# Supplementary material for: Integrating analog and digital modes of gene expression at Arabidopsis FLC
Source: eLife. 2023 Jul 19;12:e79743. doi: 10.7554/eLife.79743 (PMC10356135; doi:10.7554/eLife.79743)
Supplement: Supplementary file 2. [file elife-79743-supp2.xlsx]

## Sheet: Sheet1
Primer name	Target	Sequence (5’-3’)	Purpose
SDB_FLC_4548_F	Unspliced FLC	ACTTGATCGGTAATTGCTGAACA	qPCR
SDB_FLC_4701_R	Unspliced FLC	CATTGGACACACAACACGCA	qPCR + RT
FLC_spliced_F	Spliced FLC	AGCCAAGAAGACCGAACTCA	qPCR
FLC_spliced_R	Spliced FLC	TTTGTCCAGCAGGTGACATC	qPCR + RT
SDB_FLC-VENUS_ex6_cDNA_744_R	FLC-Venus	GTGCAGATCAGCTTCAGGGT	qPCR + RT
UBC_qPCR_F	Spliced UBC	CTGCGACTCAGGGAATCTTCTAA	qPCR
UBC_qPCR_R	Spliced UBC	TTGTGCCATTGAATTGAACCC	qPCR + RT
PP2A F2	Spliced PP2AA3	ACTGCATCTAAAGACAGAGTTCC	qPCR
PP2A R2	Spliced PP2AA3	CCAAGCATGGCCGTATCATGT	qPCR + RT
gamma.QPCR.F	γFCA	AACTCCAGGGGCCAGCCATAATACT	qPCR
gamma.QPCR.R	γFCA	TGTGTCCGAGCATAATCCTGAGCAT	qPCR + RT
SDB_fca-3_F1	fca-3 GT	TCCAACTGTTTGACTGTCAT	Genotyping
SDB_fca-3_R1	fca-3 GT	ACATACCACGACTCTGTCTA	Genotyping
fca-3 GTF	fca-3 GT	AACGGCTACCTTCCCAGTTC	Genotyping
fca-3 GTR	fca-3 GT	CCATTGCCGTCTCTTTGCTT	Genotyping
fca-1_GTF	fca-1 GT	ACCTCTTCACAGTCCACAGG	Genotyping
fca-1_GTR	fca-1 GT	TGAGTTTGCTGCGACAAGAG	Genotyping
fca-4 GTR	fca-4 GT	GGTAGGAGCTTATACAGTATGC	Genotyping
fca-4 GTF	fca-4 GT	ATGAGTTATCTTGCCCATAAC	Genotyping
fca-4 (for WT) GTR	fca-4 GT	CTCCCCGTCAGCATATCGAA	Genotyping
