# Supplementary material for: Integrating analog and digital modes of gene expression at Arabidopsis FLC
Source: eLife. 2023 Jul 19;12:e79743. doi: 10.7554/eLife.79743 (PMC10356135; doi:10.7554/eLife.79743)
Supplement: Supplementary file 5. [file elife-79743-supp5.xlsx]

## Sheet: FLC_qPCR
genotype	timepoint	rep	FLC
Ler	7	1	0.670922
Ler	7	2	0.346637
Ler	7	3	0.533165
Ler	15	1	0.317755
Ler	15	2	0.32338
Ler	15	3	0.354337
Ler	21	1	0.227409
Ler	21	2	0.136784
Ler	21	3	0.20064
fca-3	7	1	4.86996
fca-3	7	2	5.13003
fca-3	7	3	3.84704
fca-3	15	1	2.38151
fca-3	15	2	4.33846
fca-3	15	3	3.71816
fca-3	21	1	2.20586
fca-3	21	2	2.81704
fca-3	21	3	2.54218
fca-1	7	1	7.41809
fca-1	7	2	7.87344
fca-1	7	3	7.73653
fca-1	15	1	6.8235
fca-1	15	2	7.78615
fca-1	15	3	7.13316
fca-1	21	1	6.16336
fca-1	21	2	6.14556
fca-1	21	3	6.81615

## Sheet: FCA_qPCR
genotype	timepoint	rep	FCA
Ler	7	1	1.38116
Ler	7	2	0.964707
Ler	7	3	1.19111
Ler	15	1	1.16525
Ler	15	2	1.04665
Ler	15	3	1.03278
Ler	21	1	1.11258
Ler	21	2	1.12552
Ler	21	3	1.13193
fca-3	7	1	1.98354
fca-3	7	2	2.18955
fca-3	7	3	1.91908
fca-3	15	1	1.97047
fca-3	15	2	1.37603
fca-3	15	3	1.65137
fca-3	21	1	1.60838
fca-3	21	2	1.61796
fca-3	21	3	1.72921
fca-1	7	1	1.64078
fca-1	7	2	1.30314
fca-1	7	3	1.46104
fca-1	15	1	1.73615
fca-1	15	2	1.55841
fca-1	15	3	1.91985
fca-1	21	1	1.93479
fca-1	21	2	1.718
fca-1	21	3	2.57093

## Sheet: FLC_qPCR_in_FLCVenus
genotype	timepoint	rep	FLC	Outlier_test_val	Outlier_sig	Outlier_test
Ler	7	1	0.536136
Ler	7	2	0.601682
Ler	7	3	0.811965
Ler	15	1	7.32427	1.78876	Significant outlier. P < 0.05	Grubbs' test, also called the ESD method (extreme studentized deviate), to determine whether the most extreme value in the list you entered is a signficant outlier from the rest. Unlike some other outlier tests, Grubbs' test only asks whether that one value is an outlier.
Ler	15	2	0.261182
Ler	15	3	0.274435
Ler	15	4	0.193182
Ler	15	5	0.268396
Ler	21	1	0.144437
Ler	21	2	0.0995666
Ler	21	3	0.0977086
Ler	21	4	0.0951105
Ler	21	5	0.0967735
fca-3	7	1	4.39137
fca-3	7	2	2.81478
fca-3	7	3	2.8105
fca-3	7	4	2.36968
fca-3	15	1	2.18157
fca-3	15	2	1.45721
fca-3	15	3	1.50191
fca-3	15	4	1.73728
fca-3	21	1	1.511
fca-3	21	2	3.14639	2.20943	Significant outlier. P < 0.05	Grubbs' test, also called the ESD method (extreme studentized deviate), to determine whether the most extreme value in the list you entered is a signficant outlier from the rest. Unlike some other outlier tests, Grubbs' test only asks whether that one value is an outlier.
fca-3	21	3	1.23287
fca-3	21	4	1.44743
fca-3	21	5	1.16696
fca-3	21	6	1.11286
fca-3	21	7	1.48023
fca-1	7	1	3.01132
fca-1	7	2	7.37019
fca-1	7	3	6.36418
fca-1	15	1	2.94156
fca-1	15	2	4.57503
fca-1	15	3	5.54808
fca-1	15	4	5.32808
fca-1	15	5	4.78216
fca-1	21	1	3.12204
fca-1	21	2	3.13662
fca-1	21	3	4.8712
fca-1	21	4	3.82277
fca-1	21	5	5.03271

## Sheet: FCA_qPCR_in_FLCVenus
genotype	timepoint	rep	FCA	Outlier_test_val	Outlier_sig	Outlier_test
Ler	7	1	0.86694
Ler	7	2	0.640413
Ler	7	3	0.708492
Ler	15	1	0.698671
Ler	15	2	0.793586
Ler	15	3	0.841598
Ler	15	4	0.548931
Ler	15	5	0.755638
Ler	21	1	1.09064	1.72913	Significant outlier. P < 0.05	Grubbs' test, also called the ESD method (extreme studentized deviate), to determine whether the most extreme value in the list you entered is a signficant outlier from the rest. Unlike some other outlier tests, Grubbs' test only asks whether that one value is an outlier.
Ler	21	2	0.767625
Ler	21	3	0.796251
Ler	21	4	0.762644
Ler	21	5	0.688131
fca-3	7	1	0.609066
fca-3	7	2	1.27723
fca-3	7	3	1.10254
fca-3	7	4	1.17938
fca-3	15	1	1.12665
fca-3	15	2	1.02328
fca-3	15	3	0.720364
fca-3	15	4	0.866636
fca-3	21	1	1.95726
fca-3	21	2	1.82812
fca-3	21	3	0.789325
fca-3	21	4	1.01407
fca-3	21	5	1.30685
fca-3	21	6	1.30821
fca-3	21	7	1.00637
fca-1	7	1	0.761577
fca-1	7	2	0.917027
fca-1	7	3	0.882688
fca-1	15	1	0.959207
fca-1	15	2	1.06963
fca-1	15	3	1.01536
fca-1	15	4	1.15691
fca-1	15	5	1.12844
fca-1	21	1	1.49743
fca-1	21	2	1.37479
fca-1	21	3	1.05771
fca-1	21	4	1.19578
fca-1	21	5	1.33608

## Sheet: FISH_all_filtered_results
label	pixelarea	probecount	expid	probethresh	rep	genotype	treatment_hour	treatment	hour
5	6461	39	1	35	1	fca1	ctrl	ctrl	0
6	5346	7	1	35	1	fca1	ctrl	ctrl	0
7	7657	53	1	35	1	fca1	ctrl	ctrl	0
8	7150	54	1	35	1	fca1	ctrl	ctrl	0
9	3535	50	1	35	1	fca1	ctrl	ctrl	0
12	5595	62	1	35	1	fca1	ctrl	ctrl	0
14	4321	29	1	35	1	fca1	ctrl	ctrl	0
16	4708	7	1	35	1	fca1	ctrl	ctrl	0
18	3861	38	1	35	1	fca1	ctrl	ctrl	0
21	3335	78	1	35	1	fca1	ctrl	ctrl	0
22	8398	81	1	35	1	fca1	ctrl	ctrl	0
23	6780	97	1	35	1	fca1	ctrl	ctrl	0
24	6862	63	1	35	1	fca1	ctrl	ctrl	0
25	4015	49	1	35	1	fca1	ctrl	ctrl	0
27	5520	43	1	35	1	fca1	ctrl	ctrl	0
30	2108	33	1	35	1	fca1	ctrl	ctrl	0
37	4484	83	1	35	1	fca1	ctrl	ctrl	0
38	3294	55	1	35	1	fca1	ctrl	ctrl	0
39	11810	122	1	35	1	fca1	ctrl	ctrl	0
40	5930	52	1	35	1	fca1	ctrl	ctrl	0
41	7633	99	1	35	1	fca1	ctrl	ctrl	0
44	4041	74	1	35	1	fca1	ctrl	ctrl	0
47	6677	108	1	35	1	fca1	ctrl	ctrl	0
49	6087	95	1	35	1	fca1	ctrl	ctrl	0
50	4802	68	1	35	1	fca1	ctrl	ctrl	0
52	6955	77	1	35	1	fca1	ctrl	ctrl	0
54	6870	89	1	35	1	fca1	ctrl	ctrl	0
59	3976	26	1	35	1	fca1	ctrl	ctrl	0
60	4006	44	1	35	1	fca1	ctrl	ctrl	0
61	6095	44	1	35	1	fca1	ctrl	ctrl	0
62	6280	84	1	35	1	fca1	ctrl	ctrl	0
63	13396	137	1	35	1	fca1	ctrl	ctrl	0
64	4178	45	1	35	1	fca1	ctrl	ctrl	0
65	4101	13	1	35	1	fca1	ctrl	ctrl	0
71	8458	110	1	35	1	fca1	ctrl	ctrl	0
72	5490	51	1	35	1	fca1	ctrl	ctrl	0
74	5400	32	1	35	1	fca1	ctrl	ctrl	0
1	2714	44	2	35	1	fca1	ctrl	ctrl	0
2	3312	74	2	35	1	fca1	ctrl	ctrl	0
3	4254	74	2	35	1	fca1	ctrl	ctrl	0
6	5265	23	2	35	1	fca1	ctrl	ctrl	0
10	5019	19	2	35	1	fca1	ctrl	ctrl	0
12	5970	60	2	35	1	fca1	ctrl	ctrl	0
14	6966	82	2	35	1	fca1	ctrl	ctrl	0
17	3381	50	2	35	1	fca1	ctrl	ctrl	0
18	5069	56	2	35	1	fca1	ctrl	ctrl	0
19	5727	36	2	35	1	fca1	ctrl	ctrl	0
20	7189	43	2	35	1	fca1	ctrl	ctrl	0
24	2636	8	2	35	1	fca1	ctrl	ctrl	0
26	7252	91	2	35	1	fca1	ctrl	ctrl	0
28	9175	35	2	35	1	fca1	ctrl	ctrl	0
2	4238	31	3	35	1	fca1	ctrl	ctrl	0
5	7068	71	3	35	1	fca1	ctrl	ctrl	0
7	7381	20	3	35	1	fca1	ctrl	ctrl	0
8	1139	3	3	35	1	fca1	ctrl	ctrl	0
12	4684	38	3	35	1	fca1	ctrl	ctrl	0
17	4641	10	3	35	1	fca1	ctrl	ctrl	0
18	5777	4	3	35	1	fca1	ctrl	ctrl	0
19	9235	35	3	35	1	fca1	ctrl	ctrl	0
22	5573	28	3	35	1	fca1	ctrl	ctrl	0
25	7617	38	3	35	1	fca1	ctrl	ctrl	0
26	3839	15	3	35	1	fca1	ctrl	ctrl	0
28	3656	10	3	35	1	fca1	ctrl	ctrl	0
36	6568	69	3	35	1	fca1	ctrl	ctrl	0
38	6710	51	3	35	1	fca1	ctrl	ctrl	0
44	2760	7	3	35	1	fca1	ctrl	ctrl	0
47	4272	19	3	35	1	fca1	ctrl	ctrl	0
48	3463	12	3	35	1	fca1	ctrl	ctrl	0
51	4567	31	3	35	1	fca1	ctrl	ctrl	0
55	7271	66	3	35	1	fca1	ctrl	ctrl	0
60	6173	33	3	35	1	fca1	ctrl	ctrl	0
64	4858	55	3	35	1	fca1	ctrl	ctrl	0
65	6256	65	3	35	1	fca1	ctrl	ctrl	0
67	6992	59	3	35	1	fca1	ctrl	ctrl	0
8	5904	19	4	35	1	fca1	ctrl	ctrl	0
12	5053	20	4	35	1	fca1	ctrl	ctrl	0
14	6709	20	4	35	1	fca1	ctrl	ctrl	0
17	7035	47	4	35	1	fca1	ctrl	ctrl	0
18	3355	2	4	35	1	fca1	ctrl	ctrl	0
20	6218	25	4	35	1	fca1	ctrl	ctrl	0
22	5367	27	4	35	1	fca1	ctrl	ctrl	0
23	7576	26	4	35	1	fca1	ctrl	ctrl	0
24	3845	6	4	35	1	fca1	ctrl	ctrl	0
25	3577	17	4	35	1	fca1	ctrl	ctrl	0
26	8892	28	4	35	1	fca1	ctrl	ctrl	0
27	8003	41	4	35	1	fca1	ctrl	ctrl	0
31	5041	30	4	35	1	fca1	ctrl	ctrl	0
32	6987	71	4	35	1	fca1	ctrl	ctrl	0
33	3081	7	4	35	1	fca1	ctrl	ctrl	0
35	4139	5	4	35	1	fca1	ctrl	ctrl	0
36	8075	23	4	35	1	fca1	ctrl	ctrl	0
37	6767	22	4	35	1	fca1	ctrl	ctrl	0
38	6844	95	4	35	1	fca1	ctrl	ctrl	0
39	2767	22	4	35	1	fca1	ctrl	ctrl	0
40	4093	23	4	35	1	fca1	ctrl	ctrl	0
41	7493	58	4	35	1	fca1	ctrl	ctrl	0
42	4934	22	4	35	1	fca1	ctrl	ctrl	0
43	6723	13	4	35	1	fca1	ctrl	ctrl	0
44	5537	35	4	35	1	fca1	ctrl	ctrl	0
45	4967	19	4	35	1	fca1	ctrl	ctrl	0
52	5100	42	4	35	1	fca1	ctrl	ctrl	0
54	5980	59	4	35	1	fca1	ctrl	ctrl	0
60	2744	23	4	35	1	fca1	ctrl	ctrl	0
2	8546	18	5	35	1	fca1	ctrl	ctrl	0
5	10667	51	5	35	1	fca1	ctrl	ctrl	0
6	6409	41	5	35	1	fca1	ctrl	ctrl	0
8	7592	31	5	35	1	fca1	ctrl	ctrl	0
9	7204	52	5	35	1	fca1	ctrl	ctrl	0
11	2553	17	5	35	1	fca1	ctrl	ctrl	0
14	14585	71	5	35	1	fca1	ctrl	ctrl	0
21	2103	12	5	35	1	fca1	ctrl	ctrl	0
22	4172	29	5	35	1	fca1	ctrl	ctrl	0
24	5337	27	5	35	1	fca1	ctrl	ctrl	0
25	3798	20	5	35	1	fca1	ctrl	ctrl	0
27	6029	16	5	35	1	fca1	ctrl	ctrl	0
28	5035	26	5	35	1	fca1	ctrl	ctrl	0
29	4174	8	5	35	1	fca1	ctrl	ctrl	0
31	5020	20	5	35	1	fca1	ctrl	ctrl	0
32	4803	31	5	35	1	fca1	ctrl	ctrl	0
33	5291	48	5	35	1	fca1	ctrl	ctrl	0
34	5259	22	5	35	1	fca1	ctrl	ctrl	0
35	4326	26	5	35	1	fca1	ctrl	ctrl	0
36	3147	15	5	35	1	fca1	ctrl	ctrl	0
37	8373	85	5	35	1	fca1	ctrl	ctrl	0
38	3697	7	5	35	1	fca1	ctrl	ctrl	0
41	4485	20	5	35	1	fca1	ctrl	ctrl	0
42	7335	28	5	35	1	fca1	ctrl	ctrl	0
2	5284	67	6	35	1	fca1	ctrl	ctrl	0
3	2536	62	6	35	1	fca1	ctrl	ctrl	0
4	3722	34	6	35	1	fca1	ctrl	ctrl	0
5	3027	28	6	35	1	fca1	ctrl	ctrl	0
7	4788	30	6	35	1	fca1	ctrl	ctrl	0
8	3406	20	6	35	1	fca1	ctrl	ctrl	0
9	2869	34	6	35	1	fca1	ctrl	ctrl	0
10	6659	107	6	35	1	fca1	ctrl	ctrl	0
11	2691	37	6	35	1	fca1	ctrl	ctrl	0
12	6337	94	6	35	1	fca1	ctrl	ctrl	0
13	3857	57	6	35	1	fca1	ctrl	ctrl	0
14	3536	23	6	35	1	fca1	ctrl	ctrl	0
15	5837	23	6	35	1	fca1	ctrl	ctrl	0
16	5282	51	6	35	1	fca1	ctrl	ctrl	0
17	3233	44	6	35	1	fca1	ctrl	ctrl	0
20	2735	13	6	35	1	fca1	ctrl	ctrl	0
21	4209	36	6	35	1	fca1	ctrl	ctrl	0
22	2910	23	6	35	1	fca1	ctrl	ctrl	0
23	3886	93	6	35	1	fca1	ctrl	ctrl	0
24	3660	42	6	35	1	fca1	ctrl	ctrl	0
25	1738	34	6	35	1	fca1	ctrl	ctrl	0
26	6888	64	6	35	1	fca1	ctrl	ctrl	0
27	5389	19	6	35	1	fca1	ctrl	ctrl	0
30	9045	63	6	35	1	fca1	ctrl	ctrl	0
32	5729	134	6	35	1	fca1	ctrl	ctrl	0
33	3004	36	6	35	1	fca1	ctrl	ctrl	0
34	4410	61	6	35	1	fca1	ctrl	ctrl	0
35	3504	66	6	35	1	fca1	ctrl	ctrl	0
37	6150	67	6	35	1	fca1	ctrl	ctrl	0
38	6068	61	6	35	1	fca1	ctrl	ctrl	0
39	5060	72	6	35	1	fca1	ctrl	ctrl	0
41	4381	70	6	35	1	fca1	ctrl	ctrl	0
43	5309	68	6	35	1	fca1	ctrl	ctrl	0
44	6118	66	6	35	1	fca1	ctrl	ctrl	0
46	3474	52	6	35	1	fca1	ctrl	ctrl	0
47	5537	35	6	35	1	fca1	ctrl	ctrl	0
48	7514	83	6	35	1	fca1	ctrl	ctrl	0
49	4687	43	6	35	1	fca1	ctrl	ctrl	0
50	5888	52	6	35	1	fca1	ctrl	ctrl	0
51	3173	57	6	35	1	fca1	ctrl	ctrl	0
52	4821	92	6	35	1	fca1	ctrl	ctrl	0
54	2629	25	6	35	1	fca1	ctrl	ctrl	0
56	5267	86	6	35	1	fca1	ctrl	ctrl	0
58	5221	68	6	35	1	fca1	ctrl	ctrl	0
59	2187	27	6	35	1	fca1	ctrl	ctrl	0
61	3389	35	6	35	1	fca1	ctrl	ctrl	0
62	2825	21	6	35	1	fca1	ctrl	ctrl	0
64	1910	41	6	35	1	fca1	ctrl	ctrl	0
65	5120	70	6	35	1	fca1	ctrl	ctrl	0
69	5189	99	6	35	1	fca1	ctrl	ctrl	0
72	1969	39	6	35	1	fca1	ctrl	ctrl	0
2	6933	71	7	35	1	fca1	ctrl	ctrl	0
4	5588	80	7	35	1	fca1	ctrl	ctrl	0
5	3881	61	7	35	1	fca1	ctrl	ctrl	0
6	9506	104	7	35	1	fca1	ctrl	ctrl	0
7	7722	64	7	35	1	fca1	ctrl	ctrl	0
11	3540	20	7	35	1	fca1	ctrl	ctrl	0
16	5993	7	7	35	1	fca1	ctrl	ctrl	0
18	3577	69	7	35	1	fca1	ctrl	ctrl	0
21	5804	98	7	35	1	fca1	ctrl	ctrl	0
22	4648	35	7	35	1	fca1	ctrl	ctrl	0
23	6394	22	7	35	1	fca1	ctrl	ctrl	0
26	7000	113	7	35	1	fca1	ctrl	ctrl	0
29	3443	34	7	35	1	fca1	ctrl	ctrl	0
30	8228	158	7	35	1	fca1	ctrl	ctrl	0
31	2921	25	7	35	1	fca1	ctrl	ctrl	0
32	9249	126	7	35	1	fca1	ctrl	ctrl	0
36	2580	33	7	35	1	fca1	ctrl	ctrl	0
37	3644	46	7	35	1	fca1	ctrl	ctrl	0
38	5480	41	7	35	1	fca1	ctrl	ctrl	0
39	2821	32	7	35	1	fca1	ctrl	ctrl	0
43	6887	137	7	35	1	fca1	ctrl	ctrl	0
44	3894	61	7	35	1	fca1	ctrl	ctrl	0
45	4180	51	7	35	1	fca1	ctrl	ctrl	0
48	6437	150	7	35	1	fca1	ctrl	ctrl	0
49	10764	150	7	35	1	fca1	ctrl	ctrl	0
50	6832	79	7	35	1	fca1	ctrl	ctrl	0
51	3695	40	7	35	1	fca1	ctrl	ctrl	0
52	4410	31	7	35	1	fca1	ctrl	ctrl	0
53	4324	40	7	35	1	fca1	ctrl	ctrl	0
54	7123	135	7	35	1	fca1	ctrl	ctrl	0
55	3679	31	7	35	1	fca1	ctrl	ctrl	0
56	5336	59	7	35	1	fca1	ctrl	ctrl	0
57	5259	99	7	35	1	fca1	ctrl	ctrl	0
58	4958	97	7	35	1	fca1	ctrl	ctrl	0
59	4639	44	7	35	1	fca1	ctrl	ctrl	0
60	4413	21	7	35	1	fca1	ctrl	ctrl	0
62	1730	10	7	35	1	fca1	ctrl	ctrl	0
63	4312	24	7	35	1	fca1	ctrl	ctrl	0
65	7664	138	7	35	1	fca1	ctrl	ctrl	0
66	2901	24	7	35	1	fca1	ctrl	ctrl	0
67	3300	37	7	35	1	fca1	ctrl	ctrl	0
2	12780	36	8	35	1	fca1	ctrl	ctrl	0
3	12065	51	8	35	1	fca1	ctrl	ctrl	0
5	9594	24	8	35	1	fca1	ctrl	ctrl	0
6	4624	16	8	35	1	fca1	ctrl	ctrl	0
7	5017	23	8	35	1	fca1	ctrl	ctrl	0
9	9052	20	8	35	1	fca1	ctrl	ctrl	0
10	9372	21	8	35	1	fca1	ctrl	ctrl	0
12	2363	19	8	35	1	fca1	ctrl	ctrl	0
13	8347	20	8	35	1	fca1	ctrl	ctrl	0
14	4902	22	8	35	1	fca1	ctrl	ctrl	0
15	7365	20	8	35	1	fca1	ctrl	ctrl	0
18	6807	14	8	35	1	fca1	ctrl	ctrl	0
20	10529	41	8	35	1	fca1	ctrl	ctrl	0
21	4415	26	8	35	1	fca1	ctrl	ctrl	0
22	3885	13	8	35	1	fca1	ctrl	ctrl	0
23	9717	32	8	35	1	fca1	ctrl	ctrl	0
24	10056	37	8	35	1	fca1	ctrl	ctrl	0
25	7413	35	8	35	1	fca1	ctrl	ctrl	0
26	5120	29	8	35	1	fca1	ctrl	ctrl	0
29	7431	42	8	35	1	fca1	ctrl	ctrl	0
30	9772	68	8	35	1	fca1	ctrl	ctrl	0
32	5587	10	8	35	1	fca1	ctrl	ctrl	0
35	3808	14	8	35	1	fca1	ctrl	ctrl	0
36	6682	5	8	35	1	fca1	ctrl	ctrl	0
37	7165	31	8	35	1	fca1	ctrl	ctrl	0
38	4368	18	8	35	1	fca1	ctrl	ctrl	0
39	6618	16	8	35	1	fca1	ctrl	ctrl	0
40	8980	45	8	35	1	fca1	ctrl	ctrl	0
42	5228	17	8	35	1	fca1	ctrl	ctrl	0
43	9525	27	8	35	1	fca1	ctrl	ctrl	0
44	4122	33	8	35	1	fca1	ctrl	ctrl	0
45	7198	22	8	35	1	fca1	ctrl	ctrl	0
46	4287	6	8	35	1	fca1	ctrl	ctrl	0
47	4141	10	8	35	1	fca1	ctrl	ctrl	0
48	1629	4	8	35	1	fca1	ctrl	ctrl	0
49	8214	32	8	35	1	fca1	ctrl	ctrl	0
50	8855	62	8	35	1	fca1	ctrl	ctrl	0
51	5045	19	8	35	1	fca1	ctrl	ctrl	0
52	5109	27	8	35	1	fca1	ctrl	ctrl	0
3	5411	13	9	35	1	fca1	ctrl	ctrl	0
4	7063	33	9	35	1	fca1	ctrl	ctrl	0
5	4471	22	9	35	1	fca1	ctrl	ctrl	0
6	12165	31	9	35	1	fca1	ctrl	ctrl	0
7	9436	33	9	35	1	fca1	ctrl	ctrl	0
8	9851	1	9	35	1	fca1	ctrl	ctrl	0
9	7845	19	9	35	1	fca1	ctrl	ctrl	0
10	8717	28	9	35	1	fca1	ctrl	ctrl	0
11	14773	5	9	35	1	fca1	ctrl	ctrl	0
12	5425	30	9	35	1	fca1	ctrl	ctrl	0
13	10646	39	9	35	1	fca1	ctrl	ctrl	0
14	5615	12	9	35	1	fca1	ctrl	ctrl	0
16	4508	16	9	35	1	fca1	ctrl	ctrl	0
18	5151	11	9	35	1	fca1	ctrl	ctrl	0
19	9329	17	9	35	1	fca1	ctrl	ctrl	0
20	3248	4	9	35	1	fca1	ctrl	ctrl	0
21	5338	14	9	35	1	fca1	ctrl	ctrl	0
22	6658	23	9	35	1	fca1	ctrl	ctrl	0
23	12717	28	9	35	1	fca1	ctrl	ctrl	0
25	6636	13	9	35	1	fca1	ctrl	ctrl	0
26	10271	32	9	35	1	fca1	ctrl	ctrl	0
28	4876	10	9	35	1	fca1	ctrl	ctrl	0
31	4740	19	9	35	1	fca1	ctrl	ctrl	0
32	7266	16	9	35	1	fca1	ctrl	ctrl	0
4	4685	7	10	35	1	fca1	ctrl	ctrl	0
8	6604	20	10	35	1	fca1	ctrl	ctrl	0
9	5942	15	10	35	1	fca1	ctrl	ctrl	0
13	3324	11	10	35	1	fca1	ctrl	ctrl	0
14	4350	11	10	35	1	fca1	ctrl	ctrl	0
17	1928	5	10	35	1	fca1	ctrl	ctrl	0
22	3385	3	10	35	1	fca1	ctrl	ctrl	0
23	3256	21	10	35	1	fca1	ctrl	ctrl	0
27	5430	25	10	35	1	fca1	ctrl	ctrl	0
35	4793	5	10	35	1	fca1	ctrl	ctrl	0
36	2144	6	10	35	1	fca1	ctrl	ctrl	0
40	2682	3	10	35	1	fca1	ctrl	ctrl	0
43	4064	15	10	35	1	fca1	ctrl	ctrl	0
44	6909	19	10	35	1	fca1	ctrl	ctrl	0
52	16383	49	10	35	1	fca1	ctrl	ctrl	0
53	5834	9	10	35	1	fca1	ctrl	ctrl	0
54	4726	12	10	35	1	fca1	ctrl	ctrl	0
55	4336	13	10	35	1	fca1	ctrl	ctrl	0
57	2320	15	10	35	1	fca1	ctrl	ctrl	0
59	3340	8	10	35	1	fca1	ctrl	ctrl	0
60	6960	14	10	35	1	fca1	ctrl	ctrl	0
63	5651	11	10	35	1	fca1	ctrl	ctrl	0
66	5241	6	10	35	1	fca1	ctrl	ctrl	0
68	8610	55	10	35	1	fca1	ctrl	ctrl	0
1	5330	5	11	35	1	fca1	ctrl	ctrl	0
2	3510	7	11	35	1	fca1	ctrl	ctrl	0
3	4150	18	11	35	1	fca1	ctrl	ctrl	0
5	7956	7	11	35	1	fca1	ctrl	ctrl	0
6	2955	19	11	35	1	fca1	ctrl	ctrl	0
7	4493	3	11	35	1	fca1	ctrl	ctrl	0
8	2828	18	11	35	1	fca1	ctrl	ctrl	0
10	7424	15	11	35	1	fca1	ctrl	ctrl	0
15	4338	16	11	35	1	fca1	ctrl	ctrl	0
16	2826	16	11	35	1	fca1	ctrl	ctrl	0
17	3540	7	11	35	1	fca1	ctrl	ctrl	0
18	5546	27	11	35	1	fca1	ctrl	ctrl	0
21	5316	13	11	35	1	fca1	ctrl	ctrl	0
23	10056	68	11	35	1	fca1	ctrl	ctrl	0
24	6863	9	11	35	1	fca1	ctrl	ctrl	0
25	6020	1	11	35	1	fca1	ctrl	ctrl	0
27	4236	4	11	35	1	fca1	ctrl	ctrl	0
31	3719	9	11	35	1	fca1	ctrl	ctrl	0
32	7941	16	11	35	1	fca1	ctrl	ctrl	0
35	6148	19	11	35	1	fca1	ctrl	ctrl	0
38	3559	0	11	35	1	fca1	ctrl	ctrl	0
39	5238	11	11	35	1	fca1	ctrl	ctrl	0
40	5257	10	11	35	1	fca1	ctrl	ctrl	0
4	6857	1	12	35	1	fca3	ctrl	ctrl	0
11	3650	0	12	35	1	fca3	ctrl	ctrl	0
12	5601	0	12	35	1	fca3	ctrl	ctrl	0
13	3032	0	12	35	1	fca3	ctrl	ctrl	0
14	4125	1	12	35	1	fca3	ctrl	ctrl	0
15	3341	1	12	35	1	fca3	ctrl	ctrl	0
16	6035	0	12	35	1	fca3	ctrl	ctrl	0
17	4503	0	12	35	1	fca3	ctrl	ctrl	0
18	7011	3	12	35	1	fca3	ctrl	ctrl	0
19	4347	0	12	35	1	fca3	ctrl	ctrl	0
20	2035	0	12	35	1	fca3	ctrl	ctrl	0
21	4961	1	12	35	1	fca3	ctrl	ctrl	0
22	5636	0	12	35	1	fca3	ctrl	ctrl	0
23	7676	0	12	35	1	fca3	ctrl	ctrl	0
25	3752	1	12	35	1	fca3	ctrl	ctrl	0
29	6981	0	12	35	1	fca3	ctrl	ctrl	0
31	4847	0	12	35	1	fca3	ctrl	ctrl	0
32	6442	2	12	35	1	fca3	ctrl	ctrl	0
35	4056	1	12	35	1	fca3	ctrl	ctrl	0
36	6944	1	12	35	1	fca3	ctrl	ctrl	0
37	5404	1	12	35	1	fca3	ctrl	ctrl	0
38	9060	2	12	35	1	fca3	ctrl	ctrl	0
39	2530	1	12	35	1	fca3	ctrl	ctrl	0
40	4460	1	12	35	1	fca3	ctrl	ctrl	0
43	5736	0	12	35	1	fca3	ctrl	ctrl	0
44	6251	0	12	35	1	fca3	ctrl	ctrl	0
45	4891	0	12	35	1	fca3	ctrl	ctrl	0
46	7511	0	12	35	1	fca3	ctrl	ctrl	0
47	2497	0	12	35	1	fca3	ctrl	ctrl	0
48	5393	0	12	35	1	fca3	ctrl	ctrl	0
49	4617	0	12	35	1	fca3	ctrl	ctrl	0
50	5272	0	12	35	1	fca3	ctrl	ctrl	0
51	5738	0	12	35	1	fca3	ctrl	ctrl	0
53	2508	0	12	35	1	fca3	ctrl	ctrl	0
55	4019	0	12	35	1	fca3	ctrl	ctrl	0
56	5710	1	12	35	1	fca3	ctrl	ctrl	0
59	6659	0	12	35	1	fca3	ctrl	ctrl	0
60	6868	0	12	35	1	fca3	ctrl	ctrl	0
61	3168	0	12	35	1	fca3	ctrl	ctrl	0
2	4475	0	13	35	1	fca3	ctrl	ctrl	0
3	6354	1	13	35	1	fca3	ctrl	ctrl	0
4	8232	0	13	35	1	fca3	ctrl	ctrl	0
5	4056	0	13	35	1	fca3	ctrl	ctrl	0
7	4952	0	13	35	1	fca3	ctrl	ctrl	0
8	5352	0	13	35	1	fca3	ctrl	ctrl	0
9	6478	0	13	35	1	fca3	ctrl	ctrl	0
10	4767	0	13	35	1	fca3	ctrl	ctrl	0
11	5828	3	13	35	1	fca3	ctrl	ctrl	0
12	8779	1	13	35	1	fca3	ctrl	ctrl	0
13	6032	0	13	35	1	fca3	ctrl	ctrl	0
15	5230	0	13	35	1	fca3	ctrl	ctrl	0
17	5310	0	13	35	1	fca3	ctrl	ctrl	0
19	3883	0	13	35	1	fca3	ctrl	ctrl	0
20	7264	0	13	35	1	fca3	ctrl	ctrl	0
21	4068	2	13	35	1	fca3	ctrl	ctrl	0
24	4543	0	13	35	1	fca3	ctrl	ctrl	0
31	3605	0	13	35	1	fca3	ctrl	ctrl	0
32	9755	0	13	35	1	fca3	ctrl	ctrl	0
33	7714	2	13	35	1	fca3	ctrl	ctrl	0
34	8443	4	13	35	1	fca3	ctrl	ctrl	0
35	9958	4	13	35	1	fca3	ctrl	ctrl	0
36	3518	0	13	35	1	fca3	ctrl	ctrl	0
37	6795	0	13	35	1	fca3	ctrl	ctrl	0
40	4738	0	13	35	1	fca3	ctrl	ctrl	0
41	6608	0	13	35	1	fca3	ctrl	ctrl	0
43	8662	1	13	35	1	fca3	ctrl	ctrl	0
45	2974	0	13	35	1	fca3	ctrl	ctrl	0
5	2439	4	14	35	1	fca3	ctrl	ctrl	0
6	4648	7	14	35	1	fca3	ctrl	ctrl	0
10	4596	2	14	35	1	fca3	ctrl	ctrl	0
12	3639	9	14	35	1	fca3	ctrl	ctrl	0
14	4452	10	14	35	1	fca3	ctrl	ctrl	0
16	7860	3	14	35	1	fca3	ctrl	ctrl	0
18	3968	5	14	35	1	fca3	ctrl	ctrl	0
19	2178	6	14	35	1	fca3	ctrl	ctrl	0
22	4437	2	14	35	1	fca3	ctrl	ctrl	0
25	5062	2	14	35	1	fca3	ctrl	ctrl	0
28	5354	0	14	35	1	fca3	ctrl	ctrl	0
29	2801	2	14	35	1	fca3	ctrl	ctrl	0
32	3496	0	14	35	1	fca3	ctrl	ctrl	0
33	6016	0	14	35	1	fca3	ctrl	ctrl	0
37	5549	9	14	35	1	fca3	ctrl	ctrl	0
40	4544	4	14	35	1	fca3	ctrl	ctrl	0
41	8080	1	14	35	1	fca3	ctrl	ctrl	0
42	2000	1	14	35	1	fca3	ctrl	ctrl	0
44	6925	10	14	35	1	fca3	ctrl	ctrl	0
49	3721	4	14	35	1	fca3	ctrl	ctrl	0
52	4046	5	14	35	1	fca3	ctrl	ctrl	0
53	8861	2	14	35	1	fca3	ctrl	ctrl	0
54	3905	0	14	35	1	fca3	ctrl	ctrl	0
59	2898	1	14	35	1	fca3	ctrl	ctrl	0
61	3423	0	14	35	1	fca3	ctrl	ctrl	0
62	3288	0	14	35	1	fca3	ctrl	ctrl	0
64	4391	4	14	35	1	fca3	ctrl	ctrl	0
65	8701	3	14	35	1	fca3	ctrl	ctrl	0
66	6827	2	14	35	1	fca3	ctrl	ctrl	0
67	3736	0	14	35	1	fca3	ctrl	ctrl	0
70	4603	7	14	35	1	fca3	ctrl	ctrl	0
72	4504	8	14	35	1	fca3	ctrl	ctrl	0
73	5663	3	14	35	1	fca3	ctrl	ctrl	0
77	6101	9	14	35	1	fca3	ctrl	ctrl	0
80	3219	7	14	35	1	fca3	ctrl	ctrl	0
85	5335	0	14	35	1	fca3	ctrl	ctrl	0
86	6750	7	14	35	1	fca3	ctrl	ctrl	0
87	2692	0	14	35	1	fca3	ctrl	ctrl	0
92	8072	2	14	35	1	fca3	ctrl	ctrl	0
95	5571	0	14	35	1	fca3	ctrl	ctrl	0
97	4058	0	14	35	1	fca3	ctrl	ctrl	0
9	10417	8	15	35	1	fca3	ctrl	ctrl	0
11	5112	0	15	35	1	fca3	ctrl	ctrl	0
13	3298	0	15	35	1	fca3	ctrl	ctrl	0
14	5731	0	15	35	1	fca3	ctrl	ctrl	0
16	6346	15	15	35	1	fca3	ctrl	ctrl	0
17	4330	1	15	35	1	fca3	ctrl	ctrl	0
19	3632	5	15	35	1	fca3	ctrl	ctrl	0
20	6116	6	15	35	1	fca3	ctrl	ctrl	0
27	4226	0	15	35	1	fca3	ctrl	ctrl	0
29	10198	15	15	35	1	fca3	ctrl	ctrl	0
37	4058	3	15	35	1	fca3	ctrl	ctrl	0
39	5904	5	15	35	1	fca3	ctrl	ctrl	0
42	6428	1	15	35	1	fca3	ctrl	ctrl	0
44	4055	5	15	35	1	fca3	ctrl	ctrl	0
45	5372	6	15	35	1	fca3	ctrl	ctrl	0
46	5744	1	15	35	1	fca3	ctrl	ctrl	0
47	6730	2	15	35	1	fca3	ctrl	ctrl	0
48	5587	0	15	35	1	fca3	ctrl	ctrl	0
54	3350	0	15	35	1	fca3	ctrl	ctrl	0
55	3236	2	15	35	1	fca3	ctrl	ctrl	0
56	7916	9	15	35	1	fca3	ctrl	ctrl	0
59	5919	0	15	35	1	fca3	ctrl	ctrl	0
60	4710	8	15	35	1	fca3	ctrl	ctrl	0
62	2924	0	15	35	1	fca3	ctrl	ctrl	0
63	4610	1	15	35	1	fca3	ctrl	ctrl	0
64	3655	7	15	35	1	fca3	ctrl	ctrl	0
67	4309	7	15	35	1	fca3	ctrl	ctrl	0
68	7916	1	15	35	1	fca3	ctrl	ctrl	0
69	4020	2	15	35	1	fca3	ctrl	ctrl	0
71	2130	4	15	35	1	fca3	ctrl	ctrl	0
72	5867	3	15	35	1	fca3	ctrl	ctrl	0
75	3792	0	15	35	1	fca3	ctrl	ctrl	0
76	5061	2	15	35	1	fca3	ctrl	ctrl	0
77	3629	0	15	35	1	fca3	ctrl	ctrl	0
78	5322	0	15	35	1	fca3	ctrl	ctrl	0
81	5748	0	15	35	1	fca3	ctrl	ctrl	0
3	5613	0	17	35	1	fca3	ctrl	ctrl	0
6	12804	1	17	35	1	fca3	ctrl	ctrl	0
7	9191	1	17	35	1	fca3	ctrl	ctrl	0
10	2456	1	17	35	1	fca3	ctrl	ctrl	0
12	4290	1	17	35	1	fca3	ctrl	ctrl	0
13	11409	1	17	35	1	fca3	ctrl	ctrl	0
14	6582	1	17	35	1	fca3	ctrl	ctrl	0
23	3357	1	17	35	1	fca3	ctrl	ctrl	0
26	2755	0	17	35	1	fca3	ctrl	ctrl	0
28	5140	0	17	35	1	fca3	ctrl	ctrl	0
29	12208	7	17	35	1	fca3	ctrl	ctrl	0
32	10154	0	17	35	1	fca3	ctrl	ctrl	0
34	4241	0	17	35	1	fca3	ctrl	ctrl	0
35	7907	0	17	35	1	fca3	ctrl	ctrl	0
36	2789	0	17	35	1	fca3	ctrl	ctrl	0
37	3578	0	17	35	1	fca3	ctrl	ctrl	0
38	2752	1	17	35	1	fca3	ctrl	ctrl	0
39	11025	1	17	35	1	fca3	ctrl	ctrl	0
40	13641	3	17	35	1	fca3	ctrl	ctrl	0
41	3526	0	17	35	1	fca3	ctrl	ctrl	0
42	6793	0	17	35	1	fca3	ctrl	ctrl	0
43	11761	1	17	35	1	fca3	ctrl	ctrl	0
44	11353	2	17	35	1	fca3	ctrl	ctrl	0
46	4513	1	17	35	1	fca3	ctrl	ctrl	0
47	2501	0	17	35	1	fca3	ctrl	ctrl	0
49	4613	1	17	35	1	fca3	ctrl	ctrl	0
51	8295	5	17	35	1	fca3	ctrl	ctrl	0
52	3938	2	17	35	1	fca3	ctrl	ctrl	0
6	4704	2	18	35	1	fca3	ctrl	ctrl	0
8	6609	7	18	35	1	fca3	ctrl	ctrl	0
9	6222	2	18	35	1	fca3	ctrl	ctrl	0
11	10995	2	18	35	1	fca3	ctrl	ctrl	0
12	7805	1	18	35	1	fca3	ctrl	ctrl	0
15	4713	0	18	35	1	fca3	ctrl	ctrl	0
17	7963	4	18	35	1	fca3	ctrl	ctrl	0
19	6706	1	18	35	1	fca3	ctrl	ctrl	0
24	2112	2	18	35	1	fca3	ctrl	ctrl	0
25	10959	2	18	35	1	fca3	ctrl	ctrl	0
27	8483	2	18	35	1	fca3	ctrl	ctrl	0
28	6934	2	18	35	1	fca3	ctrl	ctrl	0
29	3104	0	18	35	1	fca3	ctrl	ctrl	0
30	4800	1	18	35	1	fca3	ctrl	ctrl	0
31	5259	2	18	35	1	fca3	ctrl	ctrl	0
32	5789	0	18	35	1	fca3	ctrl	ctrl	0
36	6828	3	18	35	1	fca3	ctrl	ctrl	0
38	4502	0	18	35	1	fca3	ctrl	ctrl	0
40	11377	4	18	35	1	fca3	ctrl	ctrl	0
42	4359	0	18	35	1	fca3	ctrl	ctrl	0
43	9255	1	18	35	1	fca3	ctrl	ctrl	0
44	5064	0	18	35	1	fca3	ctrl	ctrl	0
46	4520	2	18	35	1	fca3	ctrl	ctrl	0
47	3565	0	18	35	1	fca3	ctrl	ctrl	0
50	8990	0	18	35	1	fca3	ctrl	ctrl	0
51	10442	5	18	35	1	fca3	ctrl	ctrl	0
52	3520	0	18	35	1	fca3	ctrl	ctrl	0
55	6518	1	18	35	1	fca3	ctrl	ctrl	0
56	3439	0	18	35	1	fca3	ctrl	ctrl	0
60	5175	0	18	35	1	fca3	ctrl	ctrl	0
61	4498	0	18	35	1	fca3	ctrl	ctrl	0
63	4301	1	18	35	1	fca3	ctrl	ctrl	0
5	10091	1	19	35	1	fca3	ctrl	ctrl	0
6	5618	0	19	35	1	fca3	ctrl	ctrl	0
7	7331	0	19	35	1	fca3	ctrl	ctrl	0
9	8080	1	19	35	1	fca3	ctrl	ctrl	0
11	7340	0	19	35	1	fca3	ctrl	ctrl	0
12	7510	3	19	35	1	fca3	ctrl	ctrl	0
13	6841	0	19	35	1	fca3	ctrl	ctrl	0
16	6759	1	19	35	1	fca3	ctrl	ctrl	0
18	3215	0	19	35	1	fca3	ctrl	ctrl	0
20	4708	3	19	35	1	fca3	ctrl	ctrl	0
23	2621	0	19	35	1	fca3	ctrl	ctrl	0
24	2557	0	19	35	1	fca3	ctrl	ctrl	0
25	5903	0	19	35	1	fca3	ctrl	ctrl	0
26	8758	1	19	35	1	fca3	ctrl	ctrl	0
27	5362	0	19	35	1	fca3	ctrl	ctrl	0
28	7090	2	19	35	1	fca3	ctrl	ctrl	0
29	7192	0	19	35	1	fca3	ctrl	ctrl	0
30	9341	0	19	35	1	fca3	ctrl	ctrl	0
32	6826	0	19	35	1	fca3	ctrl	ctrl	0
33	3667	0	19	35	1	fca3	ctrl	ctrl	0
36	3465	0	19	35	1	fca3	ctrl	ctrl	0
37	3716	0	19	35	1	fca3	ctrl	ctrl	0
39	6084	1	19	35	1	fca3	ctrl	ctrl	0
40	10352	1	19	35	1	fca3	ctrl	ctrl	0
41	8913	0	19	35	1	fca3	ctrl	ctrl	0
42	4547	0	19	35	1	fca3	ctrl	ctrl	0
44	6565	0	19	35	1	fca3	ctrl	ctrl	0
45	3075	0	19	35	1	fca3	ctrl	ctrl	0
47	5163	0	19	35	1	fca3	ctrl	ctrl	0
48	5099	1	19	35	1	fca3	ctrl	ctrl	0
49	4571	0	19	35	1	fca3	ctrl	ctrl	0
50	10354	0	19	35	1	fca3	ctrl	ctrl	0
51	10209	1	19	35	1	fca3	ctrl	ctrl	0
52	8256	0	19	35	1	fca3	ctrl	ctrl	0
56	6954	1	19	35	1	fca3	ctrl	ctrl	0
3	8340	8	20	35	1	fca3	ctrl	ctrl	0
7	9657	1	20	35	1	fca3	ctrl	ctrl	0
8	9393	2	20	35	1	fca3	ctrl	ctrl	0
9	11335	0	20	35	1	fca3	ctrl	ctrl	0
10	10497	0	20	35	1	fca3	ctrl	ctrl	0
11	10884	1	20	35	1	fca3	ctrl	ctrl	0
12	9461	1	20	35	1	fca3	ctrl	ctrl	0
13	9867	0	20	35	1	fca3	ctrl	ctrl	0
14	9303	0	20	35	1	fca3	ctrl	ctrl	0
16	9665	1	20	35	1	fca3	ctrl	ctrl	0
17	9783	0	20	35	1	fca3	ctrl	ctrl	0
18	10664	1	20	35	1	fca3	ctrl	ctrl	0
19	5096	0	20	35	1	fca3	ctrl	ctrl	0
20	6307	0	20	35	1	fca3	ctrl	ctrl	0
21	9075	0	20	35	1	fca3	ctrl	ctrl	0
22	4643	0	20	35	1	fca3	ctrl	ctrl	0
23	7915	4	20	35	1	fca3	ctrl	ctrl	0
24	6173	2	20	35	1	fca3	ctrl	ctrl	0
25	7778	0	20	35	1	fca3	ctrl	ctrl	0
26	9099	3	20	35	1	fca3	ctrl	ctrl	0
29	5402	0	20	35	1	fca3	ctrl	ctrl	0
31	8955	0	20	35	1	fca3	ctrl	ctrl	0
32	5282	0	20	35	1	fca3	ctrl	ctrl	0
34	6324	0	20	35	1	fca3	ctrl	ctrl	0
36	6194	0	20	35	1	fca3	ctrl	ctrl	0
37	3973	0	20	35	1	fca3	ctrl	ctrl	0
38	7802	0	20	35	1	fca3	ctrl	ctrl	0
40	5021	1	20	35	1	fca3	ctrl	ctrl	0
1	3941	1	21	35	1	fca3	ctrl	ctrl	0
6	2916	1	21	35	1	fca3	ctrl	ctrl	0
7	4249	2	21	35	1	fca3	ctrl	ctrl	0
8	3372	3	21	35	1	fca3	ctrl	ctrl	0
11	9238	0	21	35	1	fca3	ctrl	ctrl	0
14	7288	2	21	35	1	fca3	ctrl	ctrl	0
15	3210	0	21	35	1	fca3	ctrl	ctrl	0
16	8947	1	21	35	1	fca3	ctrl	ctrl	0
18	5626	0	21	35	1	fca3	ctrl	ctrl	0
19	2982	4	21	35	1	fca3	ctrl	ctrl	0
22	2945	6	21	35	1	fca3	ctrl	ctrl	0
24	3771	0	21	35	1	fca3	ctrl	ctrl	0
25	2336	0	21	35	1	fca3	ctrl	ctrl	0
27	4994	0	21	35	1	fca3	ctrl	ctrl	0
28	3162	0	21	35	1	fca3	ctrl	ctrl	0
32	3258	0	21	35	1	fca3	ctrl	ctrl	0
33	4405	1	21	35	1	fca3	ctrl	ctrl	0
37	8142	3	21	35	1	fca3	ctrl	ctrl	0
39	3975	2	21	35	1	fca3	ctrl	ctrl	0
41	5511	1	21	35	1	fca3	ctrl	ctrl	0
42	5159	0	21	35	1	fca3	ctrl	ctrl	0
43	3817	1	21	35	1	fca3	ctrl	ctrl	0
44	6181	0	21	35	1	fca3	ctrl	ctrl	0
45	4907	0	21	35	1	fca3	ctrl	ctrl	0
48	1550	0	21	35	1	fca3	ctrl	ctrl	0
52	4967	0	21	35	1	fca3	ctrl	ctrl	0
53	7670	2	21	35	1	fca3	ctrl	ctrl	0
54	6756	0	21	35	1	fca3	ctrl	ctrl	0
58	7488	1	21	35	1	fca3	ctrl	ctrl	0
61	4371	1	21	35	1	fca3	ctrl	ctrl	0
62	2120	0	21	35	1	fca3	ctrl	ctrl	0
63	5256	2	21	35	1	fca3	ctrl	ctrl	0
65	4675	0	21	35	1	fca3	ctrl	ctrl	0
66	3481	0	21	35	1	fca3	ctrl	ctrl	0
68	5682	2	21	35	1	fca3	ctrl	ctrl	0
69	8858	1	21	35	1	fca3	ctrl	ctrl	0
70	6797	0	21	35	1	fca3	ctrl	ctrl	0
71	8893	1	21	35	1	fca3	ctrl	ctrl	0
72	6123	0	21	35	1	fca3	ctrl	ctrl	0
73	3598	1	21	35	1	fca3	ctrl	ctrl	0
74	6880	0	21	35	1	fca3	ctrl	ctrl	0
75	7133	0	21	35	1	fca3	ctrl	ctrl	0
76	7974	2	21	35	1	fca3	ctrl	ctrl	0
4	6715	4	22	35	1	fca3	ctrl	ctrl	0
5	8302	6	22	35	1	fca3	ctrl	ctrl	0
6	5919	2	22	35	1	fca3	ctrl	ctrl	0
11	6756	0	22	35	1	fca3	ctrl	ctrl	0
12	11065	0	22	35	1	fca3	ctrl	ctrl	0
16	6351	4	22	35	1	fca3	ctrl	ctrl	0
19	3497	0	22	35	1	fca3	ctrl	ctrl	0
20	3549	0	22	35	1	fca3	ctrl	ctrl	0
21	8944	1	22	35	1	fca3	ctrl	ctrl	0
23	5254	1	22	35	1	fca3	ctrl	ctrl	0
25	5234	0	22	35	1	fca3	ctrl	ctrl	0
26	4157	0	22	35	1	fca3	ctrl	ctrl	0
27	9348	0	22	35	1	fca3	ctrl	ctrl	0
31	6641	0	22	35	1	fca3	ctrl	ctrl	0
32	3980	0	22	35	1	fca3	ctrl	ctrl	0
36	6382	0	22	35	1	fca3	ctrl	ctrl	0
38	10360	3	22	35	1	fca3	ctrl	ctrl	0
39	3534	2	22	35	1	fca3	ctrl	ctrl	0
40	5111	0	22	35	1	fca3	ctrl	ctrl	0
41	3020	0	22	35	1	fca3	ctrl	ctrl	0
42	3936	2	22	35	1	fca3	ctrl	ctrl	0
43	6053	1	22	35	1	fca3	ctrl	ctrl	0
44	6291	0	22	35	1	fca3	ctrl	ctrl	0
45	4789	2	22	35	1	fca3	ctrl	ctrl	0
46	10443	2	22	35	1	fca3	ctrl	ctrl	0
47	4296	0	22	35	1	fca3	ctrl	ctrl	0
48	8863	3	22	35	1	fca3	ctrl	ctrl	0
49	3567	0	22	35	1	fca3	ctrl	ctrl	0
52	5756	0	22	35	1	fca3	ctrl	ctrl	0
53	4061	0	22	35	1	fca3	ctrl	ctrl	0
54	4889	1	22	35	1	fca3	ctrl	ctrl	0
56	6199	0	22	35	1	fca3	ctrl	ctrl	0
59	9856	4	22	35	1	fca3	ctrl	ctrl	0
64	6397	0	22	35	1	fca3	ctrl	ctrl	0
66	3788	0	22	35	1	fca3	ctrl	ctrl	0
2	2368	0	23	35	1	fca3	ctrl	ctrl	0
7	11281	10	23	35	1	fca3	ctrl	ctrl	0
8	5156	0	23	35	1	fca3	ctrl	ctrl	0
10	7422	2	23	35	1	fca3	ctrl	ctrl	0
14	6750	1	23	35	1	fca3	ctrl	ctrl	0
15	8593	8	23	35	1	fca3	ctrl	ctrl	0
18	6311	1	23	35	1	fca3	ctrl	ctrl	0
20	4937	0	23	35	1	fca3	ctrl	ctrl	0
21	2320	0	23	35	1	fca3	ctrl	ctrl	0
22	10557	2	23	35	1	fca3	ctrl	ctrl	0
24	6206	5	23	35	1	fca3	ctrl	ctrl	0
25	6646	2	23	35	1	fca3	ctrl	ctrl	0
27	8522	3	23	35	1	fca3	ctrl	ctrl	0
28	7693	2	23	35	1	fca3	ctrl	ctrl	0
29	7380	1	23	35	1	fca3	ctrl	ctrl	0
30	6630	1	23	35	1	fca3	ctrl	ctrl	0
33	8401	2	23	35	1	fca3	ctrl	ctrl	0
34	8541	0	23	35	1	fca3	ctrl	ctrl	0
36	5225	1	23	35	1	fca3	ctrl	ctrl	0
39	6793	7	23	35	1	fca3	ctrl	ctrl	0
40	8615	0	23	35	1	fca3	ctrl	ctrl	0
4	4772	0	24	35	1	fca3	ctrl	ctrl	0
7	3227	0	24	35	1	fca3	ctrl	ctrl	0
11	2643	0	24	35	1	fca3	ctrl	ctrl	0
13	1098	0	24	35	1	fca3	ctrl	ctrl	0
15	3679	2	24	35	1	fca3	ctrl	ctrl	0
18	5928	4	24	35	1	fca3	ctrl	ctrl	0
19	9495	2	24	35	1	fca3	ctrl	ctrl	0
22	9730	0	24	35	1	fca3	ctrl	ctrl	0
24	4918	1	24	35	1	fca3	ctrl	ctrl	0
25	4443	2	24	35	1	fca3	ctrl	ctrl	0
26	6822	3	24	35	1	fca3	ctrl	ctrl	0
27	5346	0	24	35	1	fca3	ctrl	ctrl	0
28	6835	0	24	35	1	fca3	ctrl	ctrl	0
30	3989	0	24	35	1	fca3	ctrl	ctrl	0
32	6228	1	24	35	1	fca3	ctrl	ctrl	0
35	10492	0	24	35	1	fca3	ctrl	ctrl	0
37	5524	0	24	35	1	fca3	ctrl	ctrl	0
38	9260	0	24	35	1	fca3	ctrl	ctrl	0
39	4301	1	24	35	1	fca3	ctrl	ctrl	0
40	4275	0	24	35	1	fca3	ctrl	ctrl	0
41	3355	0	24	35	1	fca3	ctrl	ctrl	0
44	10032	13	24	35	1	fca3	ctrl	ctrl	0
45	7329	1	24	35	1	fca3	ctrl	ctrl	0
47	2636	0	24	35	1	fca3	ctrl	ctrl	0
48	3254	0	24	35	1	fca3	ctrl	ctrl	0
49	4555	0	24	35	1	fca3	ctrl	ctrl	0
50	10036	1	24	35	1	fca3	ctrl	ctrl	0
51	3570	5	24	35	1	fca3	ctrl	ctrl	0
52	6424	0	24	35	1	fca3	ctrl	ctrl	0
53	5561	0	24	35	1	fca3	ctrl	ctrl	0
55	6984	0	24	35	1	fca3	ctrl	ctrl	0
56	3184	0	24	35	1	fca3	ctrl	ctrl	0
57	5711	0	24	35	1	fca3	ctrl	ctrl	0
58	6200	4	24	35	1	fca3	ctrl	ctrl	0
60	5328	0	24	35	1	fca3	ctrl	ctrl	0
63	3261	0	24	35	1	fca3	ctrl	ctrl	0
65	4449	0	24	35	1	fca3	ctrl	ctrl	0
67	7387	7	24	35	1	fca3	ctrl	ctrl	0
68	5882	1	24	35	1	fca3	ctrl	ctrl	0
69	6065	0	24	35	1	fca3	ctrl	ctrl	0
70	3933	0	24	35	1	fca3	ctrl	ctrl	0
71	7148	7	24	35	1	fca3	ctrl	ctrl	0
73	4310	1	24	35	1	fca3	ctrl	ctrl	0
7	3295	0	25	35	1	fca3	ctrl	ctrl	0
9	4466	0	25	35	1	fca3	ctrl	ctrl	0
10	7451	9	25	35	1	fca3	ctrl	ctrl	0
11	5928	0	25	35	1	fca3	ctrl	ctrl	0
12	6127	0	25	35	1	fca3	ctrl	ctrl	0
13	3889	0	25	35	1	fca3	ctrl	ctrl	0
15	4660	1	25	35	1	fca3	ctrl	ctrl	0
17	5357	8	25	35	1	fca3	ctrl	ctrl	0
18	3244	0	25	35	1	fca3	ctrl	ctrl	0
19	2500	1	25	35	1	fca3	ctrl	ctrl	0
21	4006	4	25	35	1	fca3	ctrl	ctrl	0
22	3403	0	25	35	1	fca3	ctrl	ctrl	0
23	3859	0	25	35	1	fca3	ctrl	ctrl	0
25	5993	17	25	35	1	fca3	ctrl	ctrl	0
27	5207	1	25	35	1	fca3	ctrl	ctrl	0
28	3138	0	25	35	1	fca3	ctrl	ctrl	0
29	5314	1	25	35	1	fca3	ctrl	ctrl	0
33	3443	2	25	35	1	fca3	ctrl	ctrl	0
34	5645	0	25	35	1	fca3	ctrl	ctrl	0
38	8646	6	25	35	1	fca3	ctrl	ctrl	0
40	6685	8	25	35	1	fca3	ctrl	ctrl	0
41	1761	0	25	35	1	fca3	ctrl	ctrl	0
42	7151	0	25	35	1	fca3	ctrl	ctrl	0
43	5575	6	25	35	1	fca3	ctrl	ctrl	0
47	4849	7	25	35	1	fca3	ctrl	ctrl	0
48	3528	6	25	35	1	fca3	ctrl	ctrl	0
51	5072	0	25	35	1	fca3	ctrl	ctrl	0
52	5258	6	25	35	1	fca3	ctrl	ctrl	0
55	4295	5	25	35	1	fca3	ctrl	ctrl	0
56	5107	2	25	35	1	fca3	ctrl	ctrl	0
58	1840	0	25	35	1	fca3	ctrl	ctrl	0
61	3621	5	25	35	1	fca3	ctrl	ctrl	0
63	6907	1	25	35	1	fca3	ctrl	ctrl	0
64	3756	1	25	35	1	fca3	ctrl	ctrl	0
68	3508	3	25	35	1	fca3	ctrl	ctrl	0
70	3416	5	25	35	1	fca3	ctrl	ctrl	0
72	2982	3	25	35	1	fca3	ctrl	ctrl	0
74	3668	0	25	35	1	fca3	ctrl	ctrl	0
79	3230	0	25	35	1	fca3	ctrl	ctrl	0
7	6092	0	26	35	1	fca3	ctrl	ctrl	0
9	2975	1	26	35	1	fca3	ctrl	ctrl	0
11	3131	2	26	35	1	fca3	ctrl	ctrl	0
19	3522	1	26	35	1	fca3	ctrl	ctrl	0
20	4053	1	26	35	1	fca3	ctrl	ctrl	0
22	7544	2	26	35	1	fca3	ctrl	ctrl	0
24	10145	1	26	35	1	fca3	ctrl	ctrl	0
32	3411	0	26	35	1	fca3	ctrl	ctrl	0
34	7537	2	26	35	1	fca3	ctrl	ctrl	0
35	8272	0	26	35	1	fca3	ctrl	ctrl	0
36	5404	0	26	35	1	fca3	ctrl	ctrl	0
38	3248	0	26	35	1	fca3	ctrl	ctrl	0
40	3906	0	26	35	1	fca3	ctrl	ctrl	0
41	12260	3	26	35	1	fca3	ctrl	ctrl	0
47	2710	1	26	35	1	fca3	ctrl	ctrl	0
49	8984	3	26	35	1	fca3	ctrl	ctrl	0
50	10469	6	26	35	1	fca3	ctrl	ctrl	0
52	6090	0	26	35	1	fca3	ctrl	ctrl	0
53	4367	0	26	35	1	fca3	ctrl	ctrl	0
54	4890	0	26	35	1	fca3	ctrl	ctrl	0
56	4759	1	26	35	1	fca3	ctrl	ctrl	0
58	3722	0	26	35	1	fca3	ctrl	ctrl	0
61	9060	0	26	35	1	fca3	ctrl	ctrl	0
63	3593	1	26	35	1	fca3	ctrl	ctrl	0
70	9796	1	26	35	1	fca3	ctrl	ctrl	0
71	10270	0	26	35	1	fca3	ctrl	ctrl	0
73	4117	2	26	35	1	fca3	ctrl	ctrl	0
1	8045	1	27	35	1	fca3	ctrl	ctrl	0
4	5208	0	27	35	1	fca3	ctrl	ctrl	0
5	4397	0	27	35	1	fca3	ctrl	ctrl	0
7	11951	1	27	35	1	fca3	ctrl	ctrl	0
9	11117	1	27	35	1	fca3	ctrl	ctrl	0
10	5953	1	27	35	1	fca3	ctrl	ctrl	0
11	9592	1	27	35	1	fca3	ctrl	ctrl	0
15	7723	0	27	35	1	fca3	ctrl	ctrl	0
16	4644	0	27	35	1	fca3	ctrl	ctrl	0
17	4276	1	27	35	1	fca3	ctrl	ctrl	0
18	7527	0	27	35	1	fca3	ctrl	ctrl	0
19	10581	0	27	35	1	fca3	ctrl	ctrl	0
21	5850	1	27	35	1	fca3	ctrl	ctrl	0
24	5534	0	27	35	1	fca3	ctrl	ctrl	0
25	5499	0	27	35	1	fca3	ctrl	ctrl	0
30	5127	0	27	35	1	fca3	ctrl	ctrl	0
31	8672	3	27	35	1	fca3	ctrl	ctrl	0
33	6048	0	27	35	1	fca3	ctrl	ctrl	0
35	6823	0	27	35	1	fca3	ctrl	ctrl	0
45	10901	2	27	35	1	fca3	ctrl	ctrl	0
46	5421	1	27	35	1	fca3	ctrl	ctrl	0
49	9310	0	27	35	1	fca3	ctrl	ctrl	0
55	8009	0	27	35	1	fca3	ctrl	ctrl	0
56	3999	2	27	35	1	fca3	ctrl	ctrl	0
57	1725	0	27	35	1	fca3	ctrl	ctrl	0
63	6011	1	27	35	1	fca3	ctrl	ctrl	0
67	4896	0	27	35	1	fca3	ctrl	ctrl	0
69	9087	1	27	35	1	fca3	ctrl	ctrl	0
8	5047	0	28	35	1	Ler	ctrl	ctrl	0
10	8158	0	28	35	1	Ler	ctrl	ctrl	0
12	5868	0	28	35	1	Ler	ctrl	ctrl	0
13	5272	0	28	35	1	Ler	ctrl	ctrl	0
18	4188	0	28	35	1	Ler	ctrl	ctrl	0
19	4486	0	28	35	1	Ler	ctrl	ctrl	0
22	2980	0	28	35	1	Ler	ctrl	ctrl	0
23	6313	0	28	35	1	Ler	ctrl	ctrl	0
24	8133	0	28	35	1	Ler	ctrl	ctrl	0
25	4092	0	28	35	1	Ler	ctrl	ctrl	0
26	3267	0	28	35	1	Ler	ctrl	ctrl	0
27	3142	1	28	35	1	Ler	ctrl	ctrl	0
28	4614	0	28	35	1	Ler	ctrl	ctrl	0
29	3776	0	28	35	1	Ler	ctrl	ctrl	0
30	4346	1	28	35	1	Ler	ctrl	ctrl	0
31	11477	1	28	35	1	Ler	ctrl	ctrl	0
32	6601	1	28	35	1	Ler	ctrl	ctrl	0
33	5272	0	28	35	1	Ler	ctrl	ctrl	0
34	2952	0	28	35	1	Ler	ctrl	ctrl	0
35	6121	0	28	35	1	Ler	ctrl	ctrl	0
38	10133	2	28	35	1	Ler	ctrl	ctrl	0
39	6340	0	28	35	1	Ler	ctrl	ctrl	0
40	4241	0	28	35	1	Ler	ctrl	ctrl	0
41	8176	0	28	35	1	Ler	ctrl	ctrl	0
42	5393	0	28	35	1	Ler	ctrl	ctrl	0
46	8752	1	28	35	1	Ler	ctrl	ctrl	0
47	7611	0	28	35	1	Ler	ctrl	ctrl	0
48	8047	0	28	35	1	Ler	ctrl	ctrl	0
49	5744	0	28	35	1	Ler	ctrl	ctrl	0
50	3633	0	28	35	1	Ler	ctrl	ctrl	0
54	4037	1	28	35	1	Ler	ctrl	ctrl	0
55	10026	0	28	35	1	Ler	ctrl	ctrl	0
57	3131	0	28	35	1	Ler	ctrl	ctrl	0
2	4471	0	29	35	1	Ler	ctrl	ctrl	0
4	11344	0	29	35	1	Ler	ctrl	ctrl	0
5	5014	0	29	35	1	Ler	ctrl	ctrl	0
6	12334	0	29	35	1	Ler	ctrl	ctrl	0
8	4751	0	29	35	1	Ler	ctrl	ctrl	0
9	3748	0	29	35	1	Ler	ctrl	ctrl	0
10	5570	0	29	35	1	Ler	ctrl	ctrl	0
13	8363	1	29	35	1	Ler	ctrl	ctrl	0
14	4621	0	29	35	1	Ler	ctrl	ctrl	0
15	8941	0	29	35	1	Ler	ctrl	ctrl	0
17	8081	0	29	35	1	Ler	ctrl	ctrl	0
22	5380	0	29	35	1	Ler	ctrl	ctrl	0
23	6976	0	29	35	1	Ler	ctrl	ctrl	0
24	6257	0	29	35	1	Ler	ctrl	ctrl	0
25	5630	0	29	35	1	Ler	ctrl	ctrl	0
26	12975	0	29	35	1	Ler	ctrl	ctrl	0
27	4933	0	29	35	1	Ler	ctrl	ctrl	0
29	10200	0	29	35	1	Ler	ctrl	ctrl	0
30	3634	0	29	35	1	Ler	ctrl	ctrl	0
31	6408	0	29	35	1	Ler	ctrl	ctrl	0
32	7634	0	29	35	1	Ler	ctrl	ctrl	0
33	11597	0	29	35	1	Ler	ctrl	ctrl	0
6	9176	3	30	35	1	Ler	ctrl	ctrl	0
7	7692	0	30	35	1	Ler	ctrl	ctrl	0
10	9059	1	30	35	1	Ler	ctrl	ctrl	0
11	8826	0	30	35	1	Ler	ctrl	ctrl	0
12	2644	0	30	35	1	Ler	ctrl	ctrl	0
13	8964	3	30	35	1	Ler	ctrl	ctrl	0
22	16624	3	30	35	1	Ler	ctrl	ctrl	0
29	9273	1	30	35	1	Ler	ctrl	ctrl	0
32	9414	0	30	35	1	Ler	ctrl	ctrl	0
36	5148	0	30	35	1	Ler	ctrl	ctrl	0
38	6067	0	30	35	1	Ler	ctrl	ctrl	0
41	7637	4	30	35	1	Ler	ctrl	ctrl	0
42	7716	0	30	35	1	Ler	ctrl	ctrl	0
49	6902	0	30	35	1	Ler	ctrl	ctrl	0
3	11751	1	31	35	1	Ler	ctrl	ctrl	0
4	7540	0	31	35	1	Ler	ctrl	ctrl	0
5	5115	1	31	35	1	Ler	ctrl	ctrl	0
6	5305	0	31	35	1	Ler	ctrl	ctrl	0
7	2381	2	31	35	1	Ler	ctrl	ctrl	0
8	9099	0	31	35	1	Ler	ctrl	ctrl	0
9	5574	0	31	35	1	Ler	ctrl	ctrl	0
10	5055	0	31	35	1	Ler	ctrl	ctrl	0
12	4580	1	31	35	1	Ler	ctrl	ctrl	0
13	5003	0	31	35	1	Ler	ctrl	ctrl	0
14	3763	0	31	35	1	Ler	ctrl	ctrl	0
15	8170	0	31	35	1	Ler	ctrl	ctrl	0
16	5320	0	31	35	1	Ler	ctrl	ctrl	0
20	20454	7	31	35	1	Ler	ctrl	ctrl	0
21	4232	0	31	35	1	Ler	ctrl	ctrl	0
22	2362	1	31	35	1	Ler	ctrl	ctrl	0
23	14824	0	31	35	1	Ler	ctrl	ctrl	0
24	4782	1	31	35	1	Ler	ctrl	ctrl	0
27	4171	0	31	35	1	Ler	ctrl	ctrl	0
29	5565	1	31	35	1	Ler	ctrl	ctrl	0
31	4029	0	31	35	1	Ler	ctrl	ctrl	0
32	2322	0	31	35	1	Ler	ctrl	ctrl	0
33	6569	0	31	35	1	Ler	ctrl	ctrl	0
34	11854	1	31	35	1	Ler	ctrl	ctrl	0
35	5317	0	31	35	1	Ler	ctrl	ctrl	0
38	3620	0	31	35	1	Ler	ctrl	ctrl	0
40	6415	0	31	35	1	Ler	ctrl	ctrl	0
41	5960	0	31	35	1	Ler	ctrl	ctrl	0
43	5810	0	31	35	1	Ler	ctrl	ctrl	0
44	5281	0	31	35	1	Ler	ctrl	ctrl	0
46	3916	0	31	35	1	Ler	ctrl	ctrl	0
47	7728	3	31	35	1	Ler	ctrl	ctrl	0
7	7573	0	32	35	1	Ler	ctrl	ctrl	0
13	5981	1	32	35	1	Ler	ctrl	ctrl	0
19	7110	0	32	35	1	Ler	ctrl	ctrl	0
22	3666	0	32	35	1	Ler	ctrl	ctrl	0
24	3017	0	32	35	1	Ler	ctrl	ctrl	0
28	4131	0	32	35	1	Ler	ctrl	ctrl	0
29	4555	0	32	35	1	Ler	ctrl	ctrl	0
30	4442	0	32	35	1	Ler	ctrl	ctrl	0
31	10582	1	32	35	1	Ler	ctrl	ctrl	0
32	7670	1	32	35	1	Ler	ctrl	ctrl	0
36	10515	4	32	35	1	Ler	ctrl	ctrl	0
38	4808	0	32	35	1	Ler	ctrl	ctrl	0
41	7349	0	32	35	1	Ler	ctrl	ctrl	0
42	3734	1	32	35	1	Ler	ctrl	ctrl	0
45	7423	2	32	35	1	Ler	ctrl	ctrl	0
48	3637	0	32	35	1	Ler	ctrl	ctrl	0
51	2769	0	32	35	1	Ler	ctrl	ctrl	0
53	5715	0	32	35	1	Ler	ctrl	ctrl	0
55	11337	1	32	35	1	Ler	ctrl	ctrl	0
56	12322	0	32	35	1	Ler	ctrl	ctrl	0
57	1934	0	32	35	1	Ler	ctrl	ctrl	0
58	2456	0	32	35	1	Ler	ctrl	ctrl	0
59	2446	0	32	35	1	Ler	ctrl	ctrl	0
60	9691	0	32	35	1	Ler	ctrl	ctrl	0
61	13836	2	32	35	1	Ler	ctrl	ctrl	0
62	13549	0	32	35	1	Ler	ctrl	ctrl	0
63	5854	1	32	35	1	Ler	ctrl	ctrl	0
65	3500	0	32	35	1	Ler	ctrl	ctrl	0
5	5614	0	33	35	1	Ler	ctrl	ctrl	0
7	3830	0	33	35	1	Ler	ctrl	ctrl	0
8	2329	0	33	35	1	Ler	ctrl	ctrl	0
11	4981	0	33	35	1	Ler	ctrl	ctrl	0
13	4080	0	33	35	1	Ler	ctrl	ctrl	0
14	5450	0	33	35	1	Ler	ctrl	ctrl	0
19	11306	0	33	35	1	Ler	ctrl	ctrl	0
20	17306	0	33	35	1	Ler	ctrl	ctrl	0
21	5355	0	33	35	1	Ler	ctrl	ctrl	0
23	23761	0	33	35	1	Ler	ctrl	ctrl	0
24	6414	0	33	35	1	Ler	ctrl	ctrl	0
26	3783	0	33	35	1	Ler	ctrl	ctrl	0
31	5366	1	33	35	1	Ler	ctrl	ctrl	0
37	7495	0	33	35	1	Ler	ctrl	ctrl	0
38	4283	0	33	35	1	Ler	ctrl	ctrl	0
43	3678	0	33	35	1	Ler	ctrl	ctrl	0
49	5478	0	33	35	1	Ler	ctrl	ctrl	0
57	12599	0	33	35	1	Ler	ctrl	ctrl	0
1	3998	0	34	35	1	Ler	ctrl	ctrl	0
2	6142	0	34	35	1	Ler	ctrl	ctrl	0
4	1580	0	34	35	1	Ler	ctrl	ctrl	0
5	2807	1	34	35	1	Ler	ctrl	ctrl	0
6	4341	0	34	35	1	Ler	ctrl	ctrl	0
8	2180	0	34	35	1	Ler	ctrl	ctrl	0
9	3508	0	34	35	1	Ler	ctrl	ctrl	0
10	4324	0	34	35	1	Ler	ctrl	ctrl	0
11	5972	1	34	35	1	Ler	ctrl	ctrl	0
13	3076	0	34	35	1	Ler	ctrl	ctrl	0
14	8596	0	34	35	1	Ler	ctrl	ctrl	0
15	2631	0	34	35	1	Ler	ctrl	ctrl	0
17	5138	1	34	35	1	Ler	ctrl	ctrl	0
18	2505	0	34	35	1	Ler	ctrl	ctrl	0
19	3338	0	34	35	1	Ler	ctrl	ctrl	0
20	3824	0	34	35	1	Ler	ctrl	ctrl	0
21	2184	0	34	35	1	Ler	ctrl	ctrl	0
22	12793	1	34	35	1	Ler	ctrl	ctrl	0
24	5221	0	34	35	1	Ler	ctrl	ctrl	0
25	6664	1	34	35	1	Ler	ctrl	ctrl	0
28	2366	0	34	35	1	Ler	ctrl	ctrl	0
31	3443	0	34	35	1	Ler	ctrl	ctrl	0
36	5257	0	34	35	1	Ler	ctrl	ctrl	0
3	8058	0	35	35	1	Ler	ctrl	ctrl	0
5	2594	0	35	35	1	Ler	ctrl	ctrl	0
7	9521	0	35	35	1	Ler	ctrl	ctrl	0
8	2990	0	35	35	1	Ler	ctrl	ctrl	0
9	2756	0	35	35	1	Ler	ctrl	ctrl	0
10	5482	0	35	35	1	Ler	ctrl	ctrl	0
13	3578	0	35	35	1	Ler	ctrl	ctrl	0
14	7511	0	35	35	1	Ler	ctrl	ctrl	0
15	7023	1	35	35	1	Ler	ctrl	ctrl	0
17	3539	0	35	35	1	Ler	ctrl	ctrl	0
18	8962	0	35	35	1	Ler	ctrl	ctrl	0
21	6770	0	35	35	1	Ler	ctrl	ctrl	0
28	7524	0	35	35	1	Ler	ctrl	ctrl	0
29	5386	0	35	35	1	Ler	ctrl	ctrl	0
31	6495	0	35	35	1	Ler	ctrl	ctrl	0
34	9032	0	35	35	1	Ler	ctrl	ctrl	0
35	6139	0	35	35	1	Ler	ctrl	ctrl	0
36	6673	1	35	35	1	Ler	ctrl	ctrl	0
38	13393	0	35	35	1	Ler	ctrl	ctrl	0
40	6586	0	35	35	1	Ler	ctrl	ctrl	0
41	11312	0	35	35	1	Ler	ctrl	ctrl	0
42	5874	0	35	35	1	Ler	ctrl	ctrl	0
43	9895	1	35	35	1	Ler	ctrl	ctrl	0
44	12634	0	35	35	1	Ler	ctrl	ctrl	0
45	5755	0	35	35	1	Ler	ctrl	ctrl	0
47	4840	0	35	35	1	Ler	ctrl	ctrl	0
49	9160	0	35	35	1	Ler	ctrl	ctrl	0
2	9697	0	36	35	1	Ler	ctrl	ctrl	0
3	5818	0	36	35	1	Ler	ctrl	ctrl	0
5	9617	0	36	35	1	Ler	ctrl	ctrl	0
8	13673	1	36	35	1	Ler	ctrl	ctrl	0
10	4057	0	36	35	1	Ler	ctrl	ctrl	0
13	3585	0	36	35	1	Ler	ctrl	ctrl	0
14	9031	2	36	35	1	Ler	ctrl	ctrl	0
15	10169	0	36	35	1	Ler	ctrl	ctrl	0
16	9298	0	36	35	1	Ler	ctrl	ctrl	0
17	11677	0	36	35	1	Ler	ctrl	ctrl	0
18	13465	1	36	35	1	Ler	ctrl	ctrl	0
19	9390	0	36	35	1	Ler	ctrl	ctrl	0
20	9472	0	36	35	1	Ler	ctrl	ctrl	0
21	6696	0	36	35	1	Ler	ctrl	ctrl	0
24	4328	1	36	35	1	Ler	ctrl	ctrl	0
25	8781	1	36	35	1	Ler	ctrl	ctrl	0
26	4728	0	36	35	1	Ler	ctrl	ctrl	0
29	4712	0	36	35	1	Ler	ctrl	ctrl	0
31	9251	0	36	35	1	Ler	ctrl	ctrl	0
32	6713	0	36	35	1	Ler	ctrl	ctrl	0
33	10213	0	36	35	1	Ler	ctrl	ctrl	0
4	7656	0	37	35	1	Ler	ctrl	ctrl	0
7	6335	0	37	35	1	Ler	ctrl	ctrl	0
8	4805	0	37	35	1	Ler	ctrl	ctrl	0
9	4089	0	37	35	1	Ler	ctrl	ctrl	0
10	4061	0	37	35	1	Ler	ctrl	ctrl	0
12	10400	0	37	35	1	Ler	ctrl	ctrl	0
13	4486	0	37	35	1	Ler	ctrl	ctrl	0
15	4336	0	37	35	1	Ler	ctrl	ctrl	0
17	5620	0	37	35	1	Ler	ctrl	ctrl	0
18	4086	0	37	35	1	Ler	ctrl	ctrl	0
19	9457	0	37	35	1	Ler	ctrl	ctrl	0
21	2222	0	37	35	1	Ler	ctrl	ctrl	0
23	6886	0	37	35	1	Ler	ctrl	ctrl	0
26	10806	0	37	35	1	Ler	ctrl	ctrl	0
28	3961	0	37	35	1	Ler	ctrl	ctrl	0
29	7624	0	37	35	1	Ler	ctrl	ctrl	0
30	4753	0	37	35	1	Ler	ctrl	ctrl	0
31	5745	0	37	35	1	Ler	ctrl	ctrl	0
32	5655	0	37	35	1	Ler	ctrl	ctrl	0
33	2809	0	37	35	1	Ler	ctrl	ctrl	0
34	3671	0	37	35	1	Ler	ctrl	ctrl	0
36	3706	0	37	35	1	Ler	ctrl	ctrl	0
37	4842	0	37	35	1	Ler	ctrl	ctrl	0
38	9270	0	37	35	1	Ler	ctrl	ctrl	0
39	8740	0	37	35	1	Ler	ctrl	ctrl	0
40	9220	0	37	35	1	Ler	ctrl	ctrl	0
41	8184	0	37	35	1	Ler	ctrl	ctrl	0
45	4859	0	37	35	1	Ler	ctrl	ctrl	0
46	3875	0	37	35	1	Ler	ctrl	ctrl	0
49	6834	0	37	35	1	Ler	ctrl	ctrl	0
50	7134	0	37	35	1	Ler	ctrl	ctrl	0
52	5907	0	37	35	1	Ler	ctrl	ctrl	0
11	3457	1	495	9	2	Ler	ctrl	ctrl	0
12	2329	0	495	9	2	Ler	ctrl	ctrl	0
13	1611	2	495	9	2	Ler	ctrl	ctrl	0
14	4134	0	495	9	2	Ler	ctrl	ctrl	0
16	3492	0	495	9	2	Ler	ctrl	ctrl	0
17	4046	5	495	9	2	Ler	ctrl	ctrl	0
19	1768	0	495	9	2	Ler	ctrl	ctrl	0
21	4973	2	495	9	2	Ler	ctrl	ctrl	0
23	5355	7	495	9	2	Ler	ctrl	ctrl	0
24	3938	0	495	9	2	Ler	ctrl	ctrl	0
32	2466	0	495	9	2	Ler	ctrl	ctrl	0
36	4913	1	495	9	2	Ler	ctrl	ctrl	0
47	6392	6	495	9	2	Ler	ctrl	ctrl	0
49	3510	2	495	9	2	Ler	ctrl	ctrl	0
51	5438	10	495	9	2	Ler	ctrl	ctrl	0
52	2989	1	495	9	2	Ler	ctrl	ctrl	0
53	4348	4	495	9	2	Ler	ctrl	ctrl	0
56	3674	3	495	9	2	Ler	ctrl	ctrl	0
57	7540	13	495	9	2	Ler	ctrl	ctrl	0
59	4109	0	495	9	2	Ler	ctrl	ctrl	0
60	3352	1	495	9	2	Ler	ctrl	ctrl	0
72	8472	2	495	9	2	Ler	ctrl	ctrl	0
74	3270	3	495	9	2	Ler	ctrl	ctrl	0
8	3014	3	496	9	2	Ler	ctrl	ctrl	0
9	3036	5	496	9	2	Ler	ctrl	ctrl	0
11	4148	8	496	9	2	Ler	ctrl	ctrl	0
13	1905	2	496	9	2	Ler	ctrl	ctrl	0
14	5347	2	496	9	2	Ler	ctrl	ctrl	0
18	4377	4	496	9	2	Ler	ctrl	ctrl	0
20	3622	2	496	9	2	Ler	ctrl	ctrl	0
21	4010	3	496	9	2	Ler	ctrl	ctrl	0
24	4782	3	496	9	2	Ler	ctrl	ctrl	0
25	4440	2	496	9	2	Ler	ctrl	ctrl	0
26	6822	12	496	9	2	Ler	ctrl	ctrl	0
30	3992	3	496	9	2	Ler	ctrl	ctrl	0
33	6394	3	496	9	2	Ler	ctrl	ctrl	0
36	4320	2	496	9	2	Ler	ctrl	ctrl	0
45	3446	0	496	9	2	Ler	ctrl	ctrl	0
47	4699	4	496	9	2	Ler	ctrl	ctrl	0
48	2124	1	496	9	2	Ler	ctrl	ctrl	0
50	5167	12	496	9	2	Ler	ctrl	ctrl	0
51	2689	2	496	9	2	Ler	ctrl	ctrl	0
54	2176	0	496	9	2	Ler	ctrl	ctrl	0
55	3313	1	496	9	2	Ler	ctrl	ctrl	0
57	4919	2	496	9	2	Ler	ctrl	ctrl	0
59	3080	3	496	9	2	Ler	ctrl	ctrl	0
60	3069	6	496	9	2	Ler	ctrl	ctrl	0
68	8130	3	496	9	2	Ler	ctrl	ctrl	0
69	2683	0	496	9	2	Ler	ctrl	ctrl	0
72	2354	1	496	9	2	Ler	ctrl	ctrl	0
76	3056	0	496	9	2	Ler	ctrl	ctrl	0
78	3393	3	496	9	2	Ler	ctrl	ctrl	0
79	8034	3	496	9	2	Ler	ctrl	ctrl	0
81	6710	1	496	9	2	Ler	ctrl	ctrl	0
3	3170	2	497	9	2	Ler	ctrl	ctrl	0
5	3046	1	497	9	2	Ler	ctrl	ctrl	0
7	5422	1	497	9	2	Ler	ctrl	ctrl	0
11	4509	4	497	9	2	Ler	ctrl	ctrl	0
12	2491	4	497	9	2	Ler	ctrl	ctrl	0
13	4565	0	497	9	2	Ler	ctrl	ctrl	0
14	6491	2	497	9	2	Ler	ctrl	ctrl	0
16	2841	0	497	9	2	Ler	ctrl	ctrl	0
19	2872	1	497	9	2	Ler	ctrl	ctrl	0
23	6966	7	497	9	2	Ler	ctrl	ctrl	0
26	6189	5	497	9	2	Ler	ctrl	ctrl	0
27	9508	2	497	9	2	Ler	ctrl	ctrl	0
28	8482	12	497	9	2	Ler	ctrl	ctrl	0
29	5953	2	497	9	2	Ler	ctrl	ctrl	0
32	7598	0	497	9	2	Ler	ctrl	ctrl	0
38	6014	15	497	9	2	Ler	ctrl	ctrl	0
39	6585	1	497	9	2	Ler	ctrl	ctrl	0
42	8459	2	497	9	2	Ler	ctrl	ctrl	0
48	8103	2	497	9	2	Ler	ctrl	ctrl	0
55	6757	2	497	9	2	Ler	ctrl	ctrl	0
7	4881	0	499	9	2	Ler	ctrl	ctrl	0
9	5839	3	499	9	2	Ler	ctrl	ctrl	0
10	4530	0	499	9	2	Ler	ctrl	ctrl	0
17	5055	2	499	9	2	Ler	ctrl	ctrl	0
18	3160	1	499	9	2	Ler	ctrl	ctrl	0
21	4526	0	499	9	2	Ler	ctrl	ctrl	0
23	4008	1	499	9	2	Ler	ctrl	ctrl	0
26	4705	2	499	9	2	Ler	ctrl	ctrl	0
27	2628	4	499	9	2	Ler	ctrl	ctrl	0
28	2977	3	499	9	2	Ler	ctrl	ctrl	0
29	4387	0	499	9	2	Ler	ctrl	ctrl	0
30	3167	1	499	9	2	Ler	ctrl	ctrl	0
31	2749	1	499	9	2	Ler	ctrl	ctrl	0
33	3895	2	499	9	2	Ler	ctrl	ctrl	0
34	3391	0	499	9	2	Ler	ctrl	ctrl	0
35	4870	0	499	9	2	Ler	ctrl	ctrl	0
41	3660	0	499	9	2	Ler	ctrl	ctrl	0
42	5480	2	499	9	2	Ler	ctrl	ctrl	0
45	1937	0	499	9	2	Ler	ctrl	ctrl	0
46	5545	3	499	9	2	Ler	ctrl	ctrl	0
49	5018	0	499	9	2	Ler	ctrl	ctrl	0
51	2938	2	499	9	2	Ler	ctrl	ctrl	0
53	6615	3	499	9	2	Ler	ctrl	ctrl	0
54	2975	1	499	9	2	Ler	ctrl	ctrl	0
55	3641	2	499	9	2	Ler	ctrl	ctrl	0
56	2370	0	499	9	2	Ler	ctrl	ctrl	0
57	6746	2	499	9	2	Ler	ctrl	ctrl	0
58	2997	4	499	9	2	Ler	ctrl	ctrl	0
59	2800	0	499	9	2	Ler	ctrl	ctrl	0
60	4669	0	499	9	2	Ler	ctrl	ctrl	0
3	6253	5	500	9	2	Ler	ctrl	ctrl	0
4	4658	2	500	9	2	Ler	ctrl	ctrl	0
5	5862	0	500	9	2	Ler	ctrl	ctrl	0
6	6868	11	500	9	2	Ler	ctrl	ctrl	0
7	8692	3	500	9	2	Ler	ctrl	ctrl	0
12	4305	0	500	9	2	Ler	ctrl	ctrl	0
13	4994	1	500	9	2	Ler	ctrl	ctrl	0
15	5632	1	500	9	2	Ler	ctrl	ctrl	0
16	4978	3	500	9	2	Ler	ctrl	ctrl	0
18	4688	1	500	9	2	Ler	ctrl	ctrl	0
21	6839	1	500	9	2	Ler	ctrl	ctrl	0
22	3242	1	500	9	2	Ler	ctrl	ctrl	0
27	5791	1	500	9	2	Ler	ctrl	ctrl	0
33	4408	0	500	9	2	Ler	ctrl	ctrl	0
51	2779	2	500	9	2	Ler	ctrl	ctrl	0
52	2442	0	500	9	2	Ler	ctrl	ctrl	0
53	5397	1	500	9	2	Ler	ctrl	ctrl	0
59	10133	1	500	9	2	Ler	ctrl	ctrl	0
60	4866	0	500	9	2	Ler	ctrl	ctrl	0
69	8251	1	500	9	2	Ler	ctrl	ctrl	0
73	2803	4	500	9	2	Ler	ctrl	ctrl	0
13	5017	6	501	9	2	Ler	ctrl	ctrl	0
15	3638	0	501	9	2	Ler	ctrl	ctrl	0
18	10454	13	501	9	2	Ler	ctrl	ctrl	0
19	3144	2	501	9	2	Ler	ctrl	ctrl	0
21	8829	3	501	9	2	Ler	ctrl	ctrl	0
22	7489	1	501	9	2	Ler	ctrl	ctrl	0
23	8291	1	501	9	2	Ler	ctrl	ctrl	0
26	5416	0	501	9	2	Ler	ctrl	ctrl	0
29	4814	2	501	9	2	Ler	ctrl	ctrl	0
30	7242	1	501	9	2	Ler	ctrl	ctrl	0
36	2362	0	501	9	2	Ler	ctrl	ctrl	0
38	3725	0	501	9	2	Ler	ctrl	ctrl	0
40	7631	11	501	9	2	Ler	ctrl	ctrl	0
44	4399	1	501	9	2	Ler	ctrl	ctrl	0
46	3857	0	501	9	2	Ler	ctrl	ctrl	0
47	4823	1	501	9	2	Ler	ctrl	ctrl	0
50	3490	1	501	9	2	Ler	ctrl	ctrl	0
5	8504	1	502	9	2	Ler	ctrl	ctrl	0
11	3369	0	502	9	2	Ler	ctrl	ctrl	0
13	3193	0	502	9	2	Ler	ctrl	ctrl	0
15	4128	1	502	9	2	Ler	ctrl	ctrl	0
18	5523	0	502	9	2	Ler	ctrl	ctrl	0
22	9449	2	502	9	2	Ler	ctrl	ctrl	0
23	6747	0	502	9	2	Ler	ctrl	ctrl	0
24	3466	0	502	9	2	Ler	ctrl	ctrl	0
25	8862	1	502	9	2	Ler	ctrl	ctrl	0
27	5015	5	502	9	2	Ler	ctrl	ctrl	0
28	10009	1	502	9	2	Ler	ctrl	ctrl	0
29	4167	0	502	9	2	Ler	ctrl	ctrl	0
30	4937	1	502	9	2	Ler	ctrl	ctrl	0
31	6541	0	502	9	2	Ler	ctrl	ctrl	0
32	5619	0	502	9	2	Ler	ctrl	ctrl	0
33	6322	1	502	9	2	Ler	ctrl	ctrl	0
34	7675	0	502	9	2	Ler	ctrl	ctrl	0
35	8219	0	502	9	2	Ler	ctrl	ctrl	0
36	6360	0	502	9	2	Ler	ctrl	ctrl	0
37	5399	1	502	9	2	Ler	ctrl	ctrl	0
38	3840	0	502	9	2	Ler	ctrl	ctrl	0
39	3220	1	502	9	2	Ler	ctrl	ctrl	0
8	7152	1	504	9	2	Ler	ctrl	ctrl	0
9	5346	1	504	9	2	Ler	ctrl	ctrl	0
10	10122	5	504	9	2	Ler	ctrl	ctrl	0
11	7985	2	504	9	2	Ler	ctrl	ctrl	0
13	8439	1	504	9	2	Ler	ctrl	ctrl	0
14	6188	3	504	9	2	Ler	ctrl	ctrl	0
16	8369	1	504	9	2	Ler	ctrl	ctrl	0
17	5767	3	504	9	2	Ler	ctrl	ctrl	0
18	11135	6	504	9	2	Ler	ctrl	ctrl	0
19	8850	2	504	9	2	Ler	ctrl	ctrl	0
20	7462	2	504	9	2	Ler	ctrl	ctrl	0
21	9766	1	504	9	2	Ler	ctrl	ctrl	0
26	13327	7	504	9	2	Ler	ctrl	ctrl	0
30	12316	6	504	9	2	Ler	ctrl	ctrl	0
32	11039	2	504	9	2	Ler	ctrl	ctrl	0
34	5268	0	504	9	2	Ler	ctrl	ctrl	0
35	13429	10	504	9	2	Ler	ctrl	ctrl	0
16	7219	3	505	9	2	Ler	ctrl	ctrl	0
26	3846	7	505	9	2	Ler	ctrl	ctrl	0
27	5726	11	505	9	2	Ler	ctrl	ctrl	0
28	6354	16	505	9	2	Ler	ctrl	ctrl	0
29	7423	3	505	9	2	Ler	ctrl	ctrl	0
30	4013	1	505	9	2	Ler	ctrl	ctrl	0
32	2113	5	505	9	2	Ler	ctrl	ctrl	0
34	5722	4	505	9	2	Ler	ctrl	ctrl	0
35	4615	3	505	9	2	Ler	ctrl	ctrl	0
36	2242	3	505	9	2	Ler	ctrl	ctrl	0
37	1810	7	505	9	2	Ler	ctrl	ctrl	0
38	1732	3	505	9	2	Ler	ctrl	ctrl	0
39	2716	4	505	9	2	Ler	ctrl	ctrl	0
40	3603	4	505	9	2	Ler	ctrl	ctrl	0
41	8941	7	505	9	2	Ler	ctrl	ctrl	0
43	5712	11	505	9	2	Ler	ctrl	ctrl	0
44	6782	9	505	9	2	Ler	ctrl	ctrl	0
46	4718	6	505	9	2	Ler	ctrl	ctrl	0
47	6121	5	505	9	2	Ler	ctrl	ctrl	0
49	6587	9	505	9	2	Ler	ctrl	ctrl	0
50	3275	4	505	9	2	Ler	ctrl	ctrl	0
51	4607	10	505	9	2	Ler	ctrl	ctrl	0
52	4313	5	505	9	2	Ler	ctrl	ctrl	0
53	4976	2	505	9	2	Ler	ctrl	ctrl	0
55	3794	16	505	9	2	Ler	ctrl	ctrl	0
56	6893	15	505	9	2	Ler	ctrl	ctrl	0
57	3564	0	505	9	2	Ler	ctrl	ctrl	0
58	2982	9	505	9	2	Ler	ctrl	ctrl	0
59	7587	6	505	9	2	Ler	ctrl	ctrl	0
62	7250	10	505	9	2	Ler	ctrl	ctrl	0
64	5040	1	505	9	2	Ler	ctrl	ctrl	0
65	5562	4	505	9	2	Ler	ctrl	ctrl	0
66	8523	16	505	9	2	Ler	ctrl	ctrl	0
67	3667	3	505	9	2	Ler	ctrl	ctrl	0
68	5580	2	505	9	2	Ler	ctrl	ctrl	0
69	5656	17	505	9	2	Ler	ctrl	ctrl	0
70	4679	6	505	9	2	Ler	ctrl	ctrl	0
71	3050	1	505	9	2	Ler	ctrl	ctrl	0
72	1473	1	505	9	2	Ler	ctrl	ctrl	0
73	6462	8	505	9	2	Ler	ctrl	ctrl	0
75	4153	3	505	9	2	Ler	ctrl	ctrl	0
77	6544	3	505	9	2	Ler	ctrl	ctrl	0
78	6801	15	505	9	2	Ler	ctrl	ctrl	0
79	4935	8	505	9	2	Ler	ctrl	ctrl	0
80	5790	10	505	9	2	Ler	ctrl	ctrl	0
86	8146	4	505	9	2	Ler	ctrl	ctrl	0
5	4099	5	506	9	2	Ler	ctrl	ctrl	0
6	2882	5	506	9	2	Ler	ctrl	ctrl	0
9	2693	1	506	9	2	Ler	ctrl	ctrl	0
16	4459	3	506	9	2	Ler	ctrl	ctrl	0
17	5542	0	506	9	2	Ler	ctrl	ctrl	0
21	3624	2	506	9	2	Ler	ctrl	ctrl	0
22	6033	5	506	9	2	Ler	ctrl	ctrl	0
23	4502	7	506	9	2	Ler	ctrl	ctrl	0
26	2780	1	506	9	2	Ler	ctrl	ctrl	0
27	3978	1	506	9	2	Ler	ctrl	ctrl	0
31	3501	6	506	9	2	Ler	ctrl	ctrl	0
32	3354	2	506	9	2	Ler	ctrl	ctrl	0
34	2139	1	506	9	2	Ler	ctrl	ctrl	0
36	3893	1	506	9	2	Ler	ctrl	ctrl	0
38	2226	2	506	9	2	Ler	ctrl	ctrl	0
40	2631	4	506	9	2	Ler	ctrl	ctrl	0
42	3293	3	506	9	2	Ler	ctrl	ctrl	0
44	1880	2	506	9	2	Ler	ctrl	ctrl	0
47	7618	6	506	9	2	Ler	ctrl	ctrl	0
50	4302	3	506	9	2	Ler	ctrl	ctrl	0
51	2001	3	506	9	2	Ler	ctrl	ctrl	0
52	5091	1	506	9	2	Ler	ctrl	ctrl	0
54	4515	4	506	9	2	Ler	ctrl	ctrl	0
55	2541	3	506	9	2	Ler	ctrl	ctrl	0
56	2433	2	506	9	2	Ler	ctrl	ctrl	0
60	4394	15	506	9	2	Ler	ctrl	ctrl	0
65	3553	3	506	9	2	Ler	ctrl	ctrl	0
67	2764	2	506	9	2	Ler	ctrl	ctrl	0
70	6386	10	506	9	2	Ler	ctrl	ctrl	0
72	5130	3	506	9	2	Ler	ctrl	ctrl	0
74	3978	1	506	9	2	Ler	ctrl	ctrl	0
77	3546	5	506	9	2	Ler	ctrl	ctrl	0
81	3626	3	506	9	2	Ler	ctrl	ctrl	0
82	7015	18	506	9	2	Ler	ctrl	ctrl	0
84	8276	7	506	9	2	Ler	ctrl	ctrl	0
85	5252	9	506	9	2	Ler	ctrl	ctrl	0
87	4948	1	506	9	2	Ler	ctrl	ctrl	0
88	5383	3	506	9	2	Ler	ctrl	ctrl	0
89	2775	2	506	9	2	Ler	ctrl	ctrl	0
90	5495	0	506	9	2	Ler	ctrl	ctrl	0
94	3375	11	506	9	2	Ler	ctrl	ctrl	0
95	3480	3	506	9	2	Ler	ctrl	ctrl	0
96	1649	0	506	9	2	Ler	ctrl	ctrl	0
97	2807	2	506	9	2	Ler	ctrl	ctrl	0
98	1670	0	506	9	2	Ler	ctrl	ctrl	0
101	1415	0	506	9	2	Ler	ctrl	ctrl	0
102	5765	2	506	9	2	Ler	ctrl	ctrl	0
103	2815	1	506	9	2	Ler	ctrl	ctrl	0
106	3484	3	506	9	2	Ler	ctrl	ctrl	0
108	4238	5	506	9	2	Ler	ctrl	ctrl	0
109	2353	0	506	9	2	Ler	ctrl	ctrl	0
1	4981	2	507	9	2	Ler	ctrl	ctrl	0
4	4882	6	507	9	2	Ler	ctrl	ctrl	0
5	3385	1	507	9	2	Ler	ctrl	ctrl	0
6	6257	7	507	9	2	Ler	ctrl	ctrl	0
7	3993	0	507	9	2	Ler	ctrl	ctrl	0
8	4641	6	507	9	2	Ler	ctrl	ctrl	0
12	5215	11	507	9	2	Ler	ctrl	ctrl	0
13	5800	4	507	9	2	Ler	ctrl	ctrl	0
15	4948	6	507	9	2	Ler	ctrl	ctrl	0
18	6273	4	507	9	2	Ler	ctrl	ctrl	0
19	8601	23	507	9	2	Ler	ctrl	ctrl	0
20	5325	3	507	9	2	Ler	ctrl	ctrl	0
25	5570	1	507	9	2	Ler	ctrl	ctrl	0
27	2581	2	507	9	2	Ler	ctrl	ctrl	0
32	4808	2	507	9	2	Ler	ctrl	ctrl	0
35	5502	5	507	9	2	Ler	ctrl	ctrl	0
36	5348	3	507	9	2	Ler	ctrl	ctrl	0
39	5078	2	507	9	2	Ler	ctrl	ctrl	0
44	3098	1	507	9	2	Ler	ctrl	ctrl	0
45	2640	5	507	9	2	Ler	ctrl	ctrl	0
46	4699	3	507	9	2	Ler	ctrl	ctrl	0
47	5132	3	507	9	2	Ler	ctrl	ctrl	0
50	3042	1	507	9	2	Ler	ctrl	ctrl	0
51	2338	2	507	9	2	Ler	ctrl	ctrl	0
53	4801	2	507	9	2	Ler	ctrl	ctrl	0
54	5292	0	507	9	2	Ler	ctrl	ctrl	0
59	4991	1	507	9	2	Ler	ctrl	ctrl	0
60	3715	4	507	9	2	Ler	ctrl	ctrl	0
63	5729	3	507	9	2	Ler	ctrl	ctrl	0
65	4795	2	507	9	2	Ler	ctrl	ctrl	0
67	4714	0	507	9	2	Ler	ctrl	ctrl	0
69	2922	2	507	9	2	Ler	ctrl	ctrl	0
70	5091	0	507	9	2	Ler	ctrl	ctrl	0
73	4090	0	507	9	2	Ler	ctrl	ctrl	0
76	5374	2	507	9	2	Ler	ctrl	ctrl	0
77	5647	11	507	9	2	Ler	ctrl	ctrl	0
79	4629	1	507	9	2	Ler	ctrl	ctrl	0
81	4338	0	507	9	2	Ler	ctrl	ctrl	0
83	3874	0	507	9	2	Ler	ctrl	ctrl	0
86	3117	0	507	9	2	Ler	ctrl	ctrl	0
16	3608	2	508	9	2	Ler	ctrl	ctrl	0
17	4670	7	508	9	2	Ler	ctrl	ctrl	0
20	2950	3	508	9	2	Ler	ctrl	ctrl	0
21	2488	1	508	9	2	Ler	ctrl	ctrl	0
22	4076	3	508	9	2	Ler	ctrl	ctrl	0
23	5010	23	508	9	2	Ler	ctrl	ctrl	0
24	3737	3	508	9	2	Ler	ctrl	ctrl	0
25	2765	0	508	9	2	Ler	ctrl	ctrl	0
26	3361	0	508	9	2	Ler	ctrl	ctrl	0
28	3479	1	508	9	2	Ler	ctrl	ctrl	0
29	2097	3	508	9	2	Ler	ctrl	ctrl	0
32	5831	10	508	9	2	Ler	ctrl	ctrl	0
36	3763	3	508	9	2	Ler	ctrl	ctrl	0
37	4115	2	508	9	2	Ler	ctrl	ctrl	0
38	3380	0	508	9	2	Ler	ctrl	ctrl	0
47	2034	3	508	9	2	Ler	ctrl	ctrl	0
49	4033	1	508	9	2	Ler	ctrl	ctrl	0
54	2878	3	508	9	2	Ler	ctrl	ctrl	0
55	4836	1	508	9	2	Ler	ctrl	ctrl	0
56	4197	1	508	9	2	Ler	ctrl	ctrl	0
57	2982	0	508	9	2	Ler	ctrl	ctrl	0
60	4603	0	508	9	2	Ler	ctrl	ctrl	0
63	3331	3	508	9	2	Ler	ctrl	ctrl	0
68	4212	5	508	9	2	Ler	ctrl	ctrl	0
70	3173	2	508	9	2	Ler	ctrl	ctrl	0
71	3461	0	508	9	2	Ler	ctrl	ctrl	0
72	3353	3	508	9	2	Ler	ctrl	ctrl	0
75	3873	0	508	9	2	Ler	ctrl	ctrl	0
77	2348	4	508	9	2	Ler	ctrl	ctrl	0
79	3883	5	508	9	2	Ler	ctrl	ctrl	0
80	4796	2	508	9	2	Ler	ctrl	ctrl	0
81	2517	0	508	9	2	Ler	ctrl	ctrl	0
86	5382	1	508	9	2	Ler	ctrl	ctrl	0
89	4306	1	508	9	2	Ler	ctrl	ctrl	0
91	4046	2	508	9	2	Ler	ctrl	ctrl	0
93	2602	1	508	9	2	Ler	ctrl	ctrl	0
94	3808	2	508	9	2	Ler	ctrl	ctrl	0
98	3049	0	508	9	2	Ler	ctrl	ctrl	0
101	5141	4	508	9	2	Ler	ctrl	ctrl	0
102	4376	1	508	9	2	Ler	ctrl	ctrl	0
105	4792	0	508	9	2	Ler	ctrl	ctrl	0
109	3020	1	508	9	2	Ler	ctrl	ctrl	0
112	6363	2	508	9	2	Ler	ctrl	ctrl	0
113	3735	0	508	9	2	Ler	ctrl	ctrl	0
114	3140	2	508	9	2	Ler	ctrl	ctrl	0
118	2377	1	508	9	2	Ler	ctrl	ctrl	0
120	4961	2	508	9	2	Ler	ctrl	ctrl	0
122	4798	2	508	9	2	Ler	ctrl	ctrl	0
123	4296	0	508	9	2	Ler	ctrl	ctrl	0
131	2143	2	508	9	2	Ler	ctrl	ctrl	0
3	3061	0	509	9	2	Ler	ctrl	ctrl	0
5	4133	0	509	9	2	Ler	ctrl	ctrl	0
9	1670	1	509	9	2	Ler	ctrl	ctrl	0
14	6370	0	509	9	2	Ler	ctrl	ctrl	0
15	3729	0	509	9	2	Ler	ctrl	ctrl	0
18	4555	0	509	9	2	Ler	ctrl	ctrl	0
20	3143	1	509	9	2	Ler	ctrl	ctrl	0
21	1584	0	509	9	2	Ler	ctrl	ctrl	0
22	4744	1	509	9	2	Ler	ctrl	ctrl	0
26	1035	3	509	9	2	Ler	ctrl	ctrl	0
31	4402	1	509	9	2	Ler	ctrl	ctrl	0
32	2364	0	509	9	2	Ler	ctrl	ctrl	0
34	2384	2	509	9	2	Ler	ctrl	ctrl	0
37	2977	4	509	9	2	Ler	ctrl	ctrl	0
41	5581	0	509	9	2	Ler	ctrl	ctrl	0
43	3813	0	509	9	2	Ler	ctrl	ctrl	0
44	5293	3	509	9	2	Ler	ctrl	ctrl	0
46	4105	2	509	9	2	Ler	ctrl	ctrl	0
47	3391	0	509	9	2	Ler	ctrl	ctrl	0
49	4062	1	509	9	2	Ler	ctrl	ctrl	0
51	3363	1	509	9	2	Ler	ctrl	ctrl	0
69	4082	1	509	9	2	Ler	ctrl	ctrl	0
71	7852	2	509	9	2	Ler	ctrl	ctrl	0
77	5749	1	509	9	2	Ler	ctrl	ctrl	0
80	7452	8	509	9	2	Ler	ctrl	ctrl	0
81	6177	0	509	9	2	Ler	ctrl	ctrl	0
82	8385	12	509	9	2	Ler	ctrl	ctrl	0
85	10064	11	509	9	2	Ler	ctrl	ctrl	0
86	10103	6	509	9	2	Ler	ctrl	ctrl	0
90	3943	3	509	9	2	Ler	ctrl	ctrl	0
91	2201	0	509	9	2	Ler	ctrl	ctrl	0
93	3122	2	509	9	2	Ler	ctrl	ctrl	0
11	3049	1	510	9	2	Ler	ctrl	ctrl	0
12	3443	3	510	9	2	Ler	ctrl	ctrl	0
13	2657	0	510	9	2	Ler	ctrl	ctrl	0
17	5545	0	510	9	2	Ler	ctrl	ctrl	0
21	3039	3	510	9	2	Ler	ctrl	ctrl	0
26	5765	3	510	9	2	Ler	ctrl	ctrl	0
27	5900	4	510	9	2	Ler	ctrl	ctrl	0
28	4494	2	510	9	2	Ler	ctrl	ctrl	0
30	2563	0	510	9	2	Ler	ctrl	ctrl	0
31	2904	5	510	9	2	Ler	ctrl	ctrl	0
32	4915	0	510	9	2	Ler	ctrl	ctrl	0
39	3748	4	510	9	2	Ler	ctrl	ctrl	0
41	2504	1	510	9	2	Ler	ctrl	ctrl	0
42	1610	0	510	9	2	Ler	ctrl	ctrl	0
48	2767	1	510	9	2	Ler	ctrl	ctrl	0
49	2421	1	510	9	2	Ler	ctrl	ctrl	0
51	3749	1	510	9	2	Ler	ctrl	ctrl	0
55	5364	2	510	9	2	Ler	ctrl	ctrl	0
56	1868	3	510	9	2	Ler	ctrl	ctrl	0
58	6293	2	510	9	2	Ler	ctrl	ctrl	0
64	4831	0	510	9	2	Ler	ctrl	ctrl	0
65	1942	2	510	9	2	Ler	ctrl	ctrl	0
66	5768	7	510	9	2	Ler	ctrl	ctrl	0
71	3553	4	510	9	2	Ler	ctrl	ctrl	0
72	6890	0	510	9	2	Ler	ctrl	ctrl	0
73	2761	0	510	9	2	Ler	ctrl	ctrl	0
74	3013	2	510	9	2	Ler	ctrl	ctrl	0
76	2263	3	510	9	2	Ler	ctrl	ctrl	0
77	3609	3	510	9	2	Ler	ctrl	ctrl	0
79	3550	2	510	9	2	Ler	ctrl	ctrl	0
81	4779	0	510	9	2	Ler	ctrl	ctrl	0
85	2437	1	510	9	2	Ler	ctrl	ctrl	0
86	4716	2	510	9	2	Ler	ctrl	ctrl	0
87	3952	1	510	9	2	Ler	ctrl	ctrl	0
90	2771	0	510	9	2	Ler	ctrl	ctrl	0
91	3660	0	510	9	2	Ler	ctrl	ctrl	0
96	4329	3	510	9	2	Ler	ctrl	ctrl	0
108	5581	1	510	9	2	Ler	ctrl	ctrl	0
6	5326	0	511	9	2	Ler	ctrl	ctrl	0
9	2237	3	511	9	2	Ler	ctrl	ctrl	0
12	5680	6	511	9	2	Ler	ctrl	ctrl	0
13	3112	0	511	9	2	Ler	ctrl	ctrl	0
21	7688	8	511	9	2	Ler	ctrl	ctrl	0
22	1970	3	511	9	2	Ler	ctrl	ctrl	0
24	1793	2	511	9	2	Ler	ctrl	ctrl	0
27	7226	12	511	9	2	Ler	ctrl	ctrl	0
29	2808	1	511	9	2	Ler	ctrl	ctrl	0
32	4315	2	511	9	2	Ler	ctrl	ctrl	0
39	3534	1	511	9	2	Ler	ctrl	ctrl	0
41	8219	11	511	9	2	Ler	ctrl	ctrl	0
42	3948	3	511	9	2	Ler	ctrl	ctrl	0
44	3412	0	511	9	2	Ler	ctrl	ctrl	0
46	3745	2	511	9	2	Ler	ctrl	ctrl	0
47	3297	1	511	9	2	Ler	ctrl	ctrl	0
48	2741	2	511	9	2	Ler	ctrl	ctrl	0
49	4407	3	511	9	2	Ler	ctrl	ctrl	0
50	6504	6	511	9	2	Ler	ctrl	ctrl	0
52	2998	0	511	9	2	Ler	ctrl	ctrl	0
55	5599	1	511	9	2	Ler	ctrl	ctrl	0
57	2891	3	511	9	2	Ler	ctrl	ctrl	0
60	3986	4	511	9	2	Ler	ctrl	ctrl	0
64	3881	1	511	9	2	Ler	ctrl	ctrl	0
68	5310	5	511	9	2	Ler	ctrl	ctrl	0
69	1829	1	511	9	2	Ler	ctrl	ctrl	0
70	2261	0	511	9	2	Ler	ctrl	ctrl	0
71	1626	0	511	9	2	Ler	ctrl	ctrl	0
72	1448	0	511	9	2	Ler	ctrl	ctrl	0
73	7946	8	511	9	2	Ler	ctrl	ctrl	0
75	4608	6	511	9	2	Ler	ctrl	ctrl	0
76	7670	5	511	9	2	Ler	ctrl	ctrl	0
77	2654	2	511	9	2	Ler	ctrl	ctrl	0
78	4941	3	511	9	2	Ler	ctrl	ctrl	0
79	4008	0	511	9	2	Ler	ctrl	ctrl	0
83	7648	6	511	9	2	Ler	ctrl	ctrl	0
84	4161	0	511	9	2	Ler	ctrl	ctrl	0
85	4168	3	511	9	2	Ler	ctrl	ctrl	0
88	2433	1	511	9	2	Ler	ctrl	ctrl	0
90	6240	4	511	9	2	Ler	ctrl	ctrl	0
91	4340	2	511	9	2	Ler	ctrl	ctrl	0
98	4347	1	511	9	2	Ler	ctrl	ctrl	0
8	2936	0	512	9	2	Ler	ctrl	ctrl	0
9	5444	4	512	9	2	Ler	ctrl	ctrl	0
20	2796	1	512	9	2	Ler	ctrl	ctrl	0
23	5690	8	512	9	2	Ler	ctrl	ctrl	0
25	3072	1	512	9	2	Ler	ctrl	ctrl	0
34	6427	5	512	9	2	Ler	ctrl	ctrl	0
35	4444	1	512	9	2	Ler	ctrl	ctrl	0
36	4798	1	512	9	2	Ler	ctrl	ctrl	0
38	5309	1	512	9	2	Ler	ctrl	ctrl	0
39	6799	4	512	9	2	Ler	ctrl	ctrl	0
40	6157	4	512	9	2	Ler	ctrl	ctrl	0
41	2627	0	512	9	2	Ler	ctrl	ctrl	0
42	5406	5	512	9	2	Ler	ctrl	ctrl	0
45	4156	0	512	9	2	Ler	ctrl	ctrl	0
46	4034	1	512	9	2	Ler	ctrl	ctrl	0
47	3084	2	512	9	2	Ler	ctrl	ctrl	0
52	4510	3	512	9	2	Ler	ctrl	ctrl	0
55	3387	0	512	9	2	Ler	ctrl	ctrl	0
60	4449	0	512	9	2	Ler	ctrl	ctrl	0
4	2582	1	514	9	2	Ler	ctrl	ctrl	0
6	2432	0	514	9	2	Ler	ctrl	ctrl	0
8	4988	0	514	9	2	Ler	ctrl	ctrl	0
10	6185	2	514	9	2	Ler	ctrl	ctrl	0
13	6829	5	514	9	2	Ler	ctrl	ctrl	0
16	7125	1	514	9	2	Ler	ctrl	ctrl	0
17	2194	1	514	9	2	Ler	ctrl	ctrl	0
18	5275	1	514	9	2	Ler	ctrl	ctrl	0
19	3172	0	514	9	2	Ler	ctrl	ctrl	0
20	3776	1	514	9	2	Ler	ctrl	ctrl	0
21	3683	0	514	9	2	Ler	ctrl	ctrl	0
24	6445	7	514	9	2	Ler	ctrl	ctrl	0
26	3082	0	514	9	2	Ler	ctrl	ctrl	0
27	4214	0	514	9	2	Ler	ctrl	ctrl	0
31	6249	3	514	9	2	Ler	ctrl	ctrl	0
32	3534	6	514	9	2	Ler	ctrl	ctrl	0
35	2558	0	514	9	2	Ler	ctrl	ctrl	0
37	7036	0	514	9	2	Ler	ctrl	ctrl	0
40	9508	0	514	9	2	Ler	ctrl	ctrl	0
41	5891	1	514	9	2	Ler	ctrl	ctrl	0
42	2933	1	514	9	2	Ler	ctrl	ctrl	0
43	4589	2	514	9	2	Ler	ctrl	ctrl	0
47	6795	1	514	9	2	Ler	ctrl	ctrl	0
49	3631	3	514	9	2	Ler	ctrl	ctrl	0
52	5595	0	514	9	2	Ler	ctrl	ctrl	0
53	7396	1	514	9	2	Ler	ctrl	ctrl	0
54	6318	1	514	9	2	Ler	ctrl	ctrl	0
55	6227	8	514	9	2	Ler	ctrl	ctrl	0
56	2931	0	514	9	2	Ler	ctrl	ctrl	0
62	4547	2	514	9	2	Ler	ctrl	ctrl	0
66	2711	0	514	9	2	Ler	ctrl	ctrl	0
71	2062	1	514	9	2	Ler	ctrl	ctrl	0
72	2600	1	514	9	2	Ler	ctrl	ctrl	0
73	5621	0	514	9	2	Ler	ctrl	ctrl	0
75	3708	1	514	9	2	Ler	ctrl	ctrl	0
77	3352	0	514	9	2	Ler	ctrl	ctrl	0
79	3382	0	514	9	2	Ler	ctrl	ctrl	0
83	3723	0	514	9	2	Ler	ctrl	ctrl	0
84	3756	0	514	9	2	Ler	ctrl	ctrl	0
85	5087	1	514	9	2	Ler	ctrl	ctrl	0
89	3203	0	514	9	2	Ler	ctrl	ctrl	0
3	7628	1	515	9	2	Ler	ctrl	ctrl	0
4	7806	1	515	9	2	Ler	ctrl	ctrl	0
5	6179	0	515	9	2	Ler	ctrl	ctrl	0
9	4726	0	515	9	2	Ler	ctrl	ctrl	0
10	3647	1	515	9	2	Ler	ctrl	ctrl	0
11	4039	0	515	9	2	Ler	ctrl	ctrl	0
13	2702	0	515	9	2	Ler	ctrl	ctrl	0
15	3587	1	515	9	2	Ler	ctrl	ctrl	0
17	4804	0	515	9	2	Ler	ctrl	ctrl	0
18	8234	0	515	9	2	Ler	ctrl	ctrl	0
19	5670	1	515	9	2	Ler	ctrl	ctrl	0
20	5166	0	515	9	2	Ler	ctrl	ctrl	0
21	4512	0	515	9	2	Ler	ctrl	ctrl	0
23	7268	0	515	9	2	Ler	ctrl	ctrl	0
24	6778	0	515	9	2	Ler	ctrl	ctrl	0
25	5504	0	515	9	2	Ler	ctrl	ctrl	0
28	6372	0	515	9	2	Ler	ctrl	ctrl	0
30	7933	0	515	9	2	Ler	ctrl	ctrl	0
33	6558	0	515	9	2	Ler	ctrl	ctrl	0
34	4430	0	515	9	2	Ler	ctrl	ctrl	0
35	2449	0	515	9	2	Ler	ctrl	ctrl	0
37	8083	2	515	9	2	Ler	ctrl	ctrl	0
39	6125	0	515	9	2	Ler	ctrl	ctrl	0
40	5947	2	515	9	2	Ler	ctrl	ctrl	0
13	1627	1	516	9	2	Ler	ctrl	ctrl	0
15	3955	1	516	9	2	Ler	ctrl	ctrl	0
21	1210	0	516	9	2	Ler	ctrl	ctrl	0
25	3477	0	516	9	2	Ler	ctrl	ctrl	0
26	7337	2	516	9	2	Ler	ctrl	ctrl	0
29	2493	3	516	9	2	Ler	ctrl	ctrl	0
31	3077	0	516	9	2	Ler	ctrl	ctrl	0
32	6853	4	516	9	2	Ler	ctrl	ctrl	0
33	2212	1	516	9	2	Ler	ctrl	ctrl	0
34	3779	0	516	9	2	Ler	ctrl	ctrl	0
35	4797	4	516	9	2	Ler	ctrl	ctrl	0
36	3211	2	516	9	2	Ler	ctrl	ctrl	0
38	2834	1	516	9	2	Ler	ctrl	ctrl	0
40	4566	1	516	9	2	Ler	ctrl	ctrl	0
41	5347	3	516	9	2	Ler	ctrl	ctrl	0
42	4637	6	516	9	2	Ler	ctrl	ctrl	0
43	5006	4	516	9	2	Ler	ctrl	ctrl	0
44	4206	0	516	9	2	Ler	ctrl	ctrl	0
47	3286	3	516	9	2	Ler	ctrl	ctrl	0
51	3943	0	516	9	2	Ler	ctrl	ctrl	0
56	10216	12	516	9	2	Ler	ctrl	ctrl	0
59	6348	5	516	9	2	Ler	ctrl	ctrl	0
62	3776	7	516	9	2	Ler	ctrl	ctrl	0
64	3629	3	516	9	2	Ler	ctrl	ctrl	0
66	7768	1	516	9	2	Ler	ctrl	ctrl	0
69	2866	1	516	9	2	Ler	ctrl	ctrl	0
70	1677	1	516	9	2	Ler	ctrl	ctrl	0
71	5562	0	516	9	2	Ler	ctrl	ctrl	0
74	2999	0	516	9	2	Ler	ctrl	ctrl	0
75	6647	1	516	9	2	Ler	ctrl	ctrl	0
76	6314	1	516	9	2	Ler	ctrl	ctrl	0
80	3052	2	516	9	2	Ler	ctrl	ctrl	0
83	3401	0	516	9	2	Ler	ctrl	ctrl	0
84	1676	0	516	9	2	Ler	ctrl	ctrl	0
85	4122	2	516	9	2	Ler	ctrl	ctrl	0
91	3601	2	516	9	2	Ler	ctrl	ctrl	0
92	1610	2	516	9	2	Ler	ctrl	ctrl	0
93	4687	4	516	9	2	Ler	ctrl	ctrl	0
96	5255	4	516	9	2	Ler	ctrl	ctrl	0
2	9124	37	517	9	2	fca1	ctrl	ctrl	0
4	6868	10	517	9	2	fca1	ctrl	ctrl	0
5	7504	19	517	9	2	fca1	ctrl	ctrl	0
7	5191	8	517	9	2	fca1	ctrl	ctrl	0
12	9373	12	517	9	2	fca1	ctrl	ctrl	0
13	6504	11	517	9	2	fca1	ctrl	ctrl	0
15	7741	14	517	9	2	fca1	ctrl	ctrl	0
16	6870	32	517	9	2	fca1	ctrl	ctrl	0
17	6343	9	517	9	2	fca1	ctrl	ctrl	0
22	6835	14	517	9	2	fca1	ctrl	ctrl	0
26	3296	5	517	9	2	fca1	ctrl	ctrl	0
27	5715	14	517	9	2	fca1	ctrl	ctrl	0
31	7290	36	517	9	2	fca1	ctrl	ctrl	0
15	7675	16	518	9	2	fca1	ctrl	ctrl	0
18	7108	12	518	9	2	fca1	ctrl	ctrl	0
25	4718	13	518	9	2	fca1	ctrl	ctrl	0
26	3583	5	518	9	2	fca1	ctrl	ctrl	0
27	6943	15	518	9	2	fca1	ctrl	ctrl	0
31	3846	8	518	9	2	fca1	ctrl	ctrl	0
34	5775	26	518	9	2	fca1	ctrl	ctrl	0
36	7783	52	518	9	2	fca1	ctrl	ctrl	0
37	8828	26	518	9	2	fca1	ctrl	ctrl	0
38	10074	24	518	9	2	fca1	ctrl	ctrl	0
39	8142	47	518	9	2	fca1	ctrl	ctrl	0
50	7019	8	518	9	2	fca1	ctrl	ctrl	0
51	5277	22	518	9	2	fca1	ctrl	ctrl	0
57	7707	36	518	9	2	fca1	ctrl	ctrl	0
67	3882	14	518	9	2	fca1	ctrl	ctrl	0
68	5337	6	518	9	2	fca1	ctrl	ctrl	0
73	3059	20	518	9	2	fca1	ctrl	ctrl	0
74	3883	4	518	9	2	fca1	ctrl	ctrl	0
75	2539	24	518	9	2	fca1	ctrl	ctrl	0
80	6624	14	518	9	2	fca1	ctrl	ctrl	0
3	5620	83	519	9	2	fca1	ctrl	ctrl	0
4	6927	70	519	9	2	fca1	ctrl	ctrl	0
5	5401	92	519	9	2	fca1	ctrl	ctrl	0
8	5326	71	519	9	2	fca1	ctrl	ctrl	0
25	6822	82	519	9	2	fca1	ctrl	ctrl	0
29	3843	86	519	9	2	fca1	ctrl	ctrl	0
32	6093	65	519	9	2	fca1	ctrl	ctrl	0
40	6951	100	519	9	2	fca1	ctrl	ctrl	0
43	5280	55	519	9	2	fca1	ctrl	ctrl	0
63	5686	69	519	9	2	fca1	ctrl	ctrl	0
67	8153	81	519	9	2	fca1	ctrl	ctrl	0
6	4909	25	520	9	2	fca1	ctrl	ctrl	0
7	7446	39	520	9	2	fca1	ctrl	ctrl	0
8	8304	55	520	9	2	fca1	ctrl	ctrl	0
9	7702	80	520	9	2	fca1	ctrl	ctrl	0
10	7320	65	520	9	2	fca1	ctrl	ctrl	0
12	8044	46	520	9	2	fca1	ctrl	ctrl	0
13	4819	40	520	9	2	fca1	ctrl	ctrl	0
14	3559	31	520	9	2	fca1	ctrl	ctrl	0
15	6492	65	520	9	2	fca1	ctrl	ctrl	0
17	5390	15	520	9	2	fca1	ctrl	ctrl	0
18	5335	23	520	9	2	fca1	ctrl	ctrl	0
22	6589	16	520	9	2	fca1	ctrl	ctrl	0
23	2436	33	520	9	2	fca1	ctrl	ctrl	0
26	7887	49	520	9	2	fca1	ctrl	ctrl	0
28	8076	32	520	9	2	fca1	ctrl	ctrl	0
29	3082	20	520	9	2	fca1	ctrl	ctrl	0
30	1639	23	520	9	2	fca1	ctrl	ctrl	0
31	7196	57	520	9	2	fca1	ctrl	ctrl	0
2	5109	42	521	9	2	fca1	ctrl	ctrl	0
4	2721	41	521	9	2	fca1	ctrl	ctrl	0
6	5663	32	521	9	2	fca1	ctrl	ctrl	0
7	3825	26	521	9	2	fca1	ctrl	ctrl	0
10	1910	20	521	9	2	fca1	ctrl	ctrl	0
12	6224	48	521	9	2	fca1	ctrl	ctrl	0
13	3313	37	521	9	2	fca1	ctrl	ctrl	0
18	3730	29	521	9	2	fca1	ctrl	ctrl	0
21	2891	27	521	9	2	fca1	ctrl	ctrl	0
25	1269	34	521	9	2	fca1	ctrl	ctrl	0
28	3470	42	521	9	2	fca1	ctrl	ctrl	0
33	4292	45	521	9	2	fca1	ctrl	ctrl	0
34	4118	43	521	9	2	fca1	ctrl	ctrl	0
35	6523	103	521	9	2	fca1	ctrl	ctrl	0
36	2107	49	521	9	2	fca1	ctrl	ctrl	0
38	6763	73	521	9	2	fca1	ctrl	ctrl	0
41	4838	27	521	9	2	fca1	ctrl	ctrl	0
42	5230	33	521	9	2	fca1	ctrl	ctrl	0
43	3673	37	521	9	2	fca1	ctrl	ctrl	0
44	4358	27	521	9	2	fca1	ctrl	ctrl	0
45	2415	20	521	9	2	fca1	ctrl	ctrl	0
46	3761	55	521	9	2	fca1	ctrl	ctrl	0
49	3037	13	521	9	2	fca1	ctrl	ctrl	0
50	7413	41	521	9	2	fca1	ctrl	ctrl	0
55	6311	81	521	9	2	fca1	ctrl	ctrl	0
57	2830	40	521	9	2	fca1	ctrl	ctrl	0
59	8903	69	521	9	2	fca1	ctrl	ctrl	0
61	2239	36	521	9	2	fca1	ctrl	ctrl	0
62	4757	52	521	9	2	fca1	ctrl	ctrl	0
65	5457	48	521	9	2	fca1	ctrl	ctrl	0
66	6358	59	521	9	2	fca1	ctrl	ctrl	0
5	5074	47	522	9	2	fca1	ctrl	ctrl	0
8	1707	26	522	9	2	fca1	ctrl	ctrl	0
10	10060	50	522	9	2	fca1	ctrl	ctrl	0
11	2653	37	522	9	2	fca1	ctrl	ctrl	0
19	9035	111	522	9	2	fca1	ctrl	ctrl	0
20	1946	32	522	9	2	fca1	ctrl	ctrl	0
22	2707	10	522	9	2	fca1	ctrl	ctrl	0
25	7220	31	522	9	2	fca1	ctrl	ctrl	0
26	2475	15	522	9	2	fca1	ctrl	ctrl	0
27	6792	53	522	9	2	fca1	ctrl	ctrl	0
34	7829	119	522	9	2	fca1	ctrl	ctrl	0
38	4319	33	522	9	2	fca1	ctrl	ctrl	0
40	3548	67	522	9	2	fca1	ctrl	ctrl	0
42	7679	33	522	9	2	fca1	ctrl	ctrl	0
44	6510	35	522	9	2	fca1	ctrl	ctrl	0
46	10090	67	522	9	2	fca1	ctrl	ctrl	0
47	8136	73	522	9	2	fca1	ctrl	ctrl	0
48	4885	23	522	9	2	fca1	ctrl	ctrl	0
49	4612	13	522	9	2	fca1	ctrl	ctrl	0
50	7847	101	522	9	2	fca1	ctrl	ctrl	0
51	9338	91	522	9	2	fca1	ctrl	ctrl	0
53	8226	33	522	9	2	fca1	ctrl	ctrl	0
56	2413	16	522	9	2	fca1	ctrl	ctrl	0
60	3831	30	522	9	2	fca1	ctrl	ctrl	0
61	6430	82	522	9	2	fca1	ctrl	ctrl	0
63	3295	15	522	9	2	fca1	ctrl	ctrl	0
5	3349	16	523	9	2	fca1	ctrl	ctrl	0
7	2419	23	523	9	2	fca1	ctrl	ctrl	0
8	2648	24	523	9	2	fca1	ctrl	ctrl	0
12	3805	75	523	9	2	fca1	ctrl	ctrl	0
13	3856	47	523	9	2	fca1	ctrl	ctrl	0
21	4076	21	523	9	2	fca1	ctrl	ctrl	0
22	4189	34	523	9	2	fca1	ctrl	ctrl	0
35	9785	16	523	9	2	fca1	ctrl	ctrl	0
38	4124	32	523	9	2	fca1	ctrl	ctrl	0
39	7172	61	523	9	2	fca1	ctrl	ctrl	0
40	4757	34	523	9	2	fca1	ctrl	ctrl	0
43	5001	12	523	9	2	fca1	ctrl	ctrl	0
44	1798	18	523	9	2	fca1	ctrl	ctrl	0
45	2961	49	523	9	2	fca1	ctrl	ctrl	0
46	2754	15	523	9	2	fca1	ctrl	ctrl	0
47	5794	47	523	9	2	fca1	ctrl	ctrl	0
48	3752	56	523	9	2	fca1	ctrl	ctrl	0
50	5989	82	523	9	2	fca1	ctrl	ctrl	0
51	3118	31	523	9	2	fca1	ctrl	ctrl	0
52	3961	16	523	9	2	fca1	ctrl	ctrl	0
53	3596	68	523	9	2	fca1	ctrl	ctrl	0
55	6579	35	523	9	2	fca1	ctrl	ctrl	0
56	8587	41	523	9	2	fca1	ctrl	ctrl	0
57	2379	14	523	9	2	fca1	ctrl	ctrl	0
58	7813	18	523	9	2	fca1	ctrl	ctrl	0
59	5982	56	523	9	2	fca1	ctrl	ctrl	0
60	7628	38	523	9	2	fca1	ctrl	ctrl	0
62	6973	21	523	9	2	fca1	ctrl	ctrl	0
2	5811	41	524	9	2	fca1	ctrl	ctrl	0
3	5018	21	524	9	2	fca1	ctrl	ctrl	0
4	2756	50	524	9	2	fca1	ctrl	ctrl	0
5	4019	14	524	9	2	fca1	ctrl	ctrl	0
6	3708	23	524	9	2	fca1	ctrl	ctrl	0
7	4929	28	524	9	2	fca1	ctrl	ctrl	0
9	5603	35	524	9	2	fca1	ctrl	ctrl	0
10	11573	26	524	9	2	fca1	ctrl	ctrl	0
11	5510	13	524	9	2	fca1	ctrl	ctrl	0
12	7524	29	524	9	2	fca1	ctrl	ctrl	0
15	8133	19	524	9	2	fca1	ctrl	ctrl	0
16	5714	18	524	9	2	fca1	ctrl	ctrl	0
17	3009	6	524	9	2	fca1	ctrl	ctrl	0
19	8869	11	524	9	2	fca1	ctrl	ctrl	0
20	4894	35	524	9	2	fca1	ctrl	ctrl	0
23	13329	15	524	9	2	fca1	ctrl	ctrl	0
26	11929	35	524	9	2	fca1	ctrl	ctrl	0
28	4659	11	524	9	2	fca1	ctrl	ctrl	0
29	8174	87	524	9	2	fca1	ctrl	ctrl	0
30	9748	18	524	9	2	fca1	ctrl	ctrl	0
5	3667	11	525	9	2	fca1	ctrl	ctrl	0
7	5035	24	525	9	2	fca1	ctrl	ctrl	0
8	3093	23	525	9	2	fca1	ctrl	ctrl	0
9	2364	18	525	9	2	fca1	ctrl	ctrl	0
21	2344	15	525	9	2	fca1	ctrl	ctrl	0
22	3609	15	525	9	2	fca1	ctrl	ctrl	0
24	4268	12	525	9	2	fca1	ctrl	ctrl	0
25	3931	23	525	9	2	fca1	ctrl	ctrl	0
26	5304	49	525	9	2	fca1	ctrl	ctrl	0
27	1605	24	525	9	2	fca1	ctrl	ctrl	0
28	3093	12	525	9	2	fca1	ctrl	ctrl	0
29	2109	25	525	9	2	fca1	ctrl	ctrl	0
30	10223	73	525	9	2	fca1	ctrl	ctrl	0
31	3561	23	525	9	2	fca1	ctrl	ctrl	0
32	3148	10	525	9	2	fca1	ctrl	ctrl	0
33	5820	35	525	9	2	fca1	ctrl	ctrl	0
35	7935	75	525	9	2	fca1	ctrl	ctrl	0
37	2811	16	525	9	2	fca1	ctrl	ctrl	0
39	4379	56	525	9	2	fca1	ctrl	ctrl	0
40	5035	26	525	9	2	fca1	ctrl	ctrl	0
41	5158	48	525	9	2	fca1	ctrl	ctrl	0
45	2856	13	525	9	2	fca1	ctrl	ctrl	0
46	6996	44	525	9	2	fca1	ctrl	ctrl	0
49	2534	23	525	9	2	fca1	ctrl	ctrl	0
51	9692	66	525	9	2	fca1	ctrl	ctrl	0
52	2047	10	525	9	2	fca1	ctrl	ctrl	0
56	4703	39	525	9	2	fca1	ctrl	ctrl	0
10	4385	48	526	9	2	fca1	ctrl	ctrl	0
11	3536	43	526	9	2	fca1	ctrl	ctrl	0
13	2965	25	526	9	2	fca1	ctrl	ctrl	0
15	4008	26	526	9	2	fca1	ctrl	ctrl	0
17	1296	13	526	9	2	fca1	ctrl	ctrl	0
22	4164	53	526	9	2	fca1	ctrl	ctrl	0
24	4666	43	526	9	2	fca1	ctrl	ctrl	0
25	3566	18	526	9	2	fca1	ctrl	ctrl	0
26	3031	17	526	9	2	fca1	ctrl	ctrl	0
29	3006	41	526	9	2	fca1	ctrl	ctrl	0
31	5675	7	526	9	2	fca1	ctrl	ctrl	0
34	2995	23	526	9	2	fca1	ctrl	ctrl	0
36	5166	7	526	9	2	fca1	ctrl	ctrl	0
37	3873	33	526	9	2	fca1	ctrl	ctrl	0
39	2687	22	526	9	2	fca1	ctrl	ctrl	0
41	757	3	526	9	2	fca1	ctrl	ctrl	0
42	4388	22	526	9	2	fca1	ctrl	ctrl	0
43	6643	4	526	9	2	fca1	ctrl	ctrl	0
45	3963	39	526	9	2	fca1	ctrl	ctrl	0
49	3736	24	526	9	2	fca1	ctrl	ctrl	0
50	2900	39	526	9	2	fca1	ctrl	ctrl	0
52	5917	40	526	9	2	fca1	ctrl	ctrl	0
55	9595	44	526	9	2	fca1	ctrl	ctrl	0
56	7069	31	526	9	2	fca1	ctrl	ctrl	0
57	3304	19	526	9	2	fca1	ctrl	ctrl	0
59	3435	16	526	9	2	fca1	ctrl	ctrl	0
63	4358	29	526	9	2	fca1	ctrl	ctrl	0
69	462	2	526	9	2	fca1	ctrl	ctrl	0
70	5132	39	526	9	2	fca1	ctrl	ctrl	0
73	6834	28	526	9	2	fca1	ctrl	ctrl	0
74	4869	27	526	9	2	fca1	ctrl	ctrl	0
77	5304	33	526	9	2	fca1	ctrl	ctrl	0
82	7698	29	526	9	2	fca1	ctrl	ctrl	0
10	6285	11	527	9	2	fca1	ctrl	ctrl	0
12	2514	21	527	9	2	fca1	ctrl	ctrl	0
13	4904	34	527	9	2	fca1	ctrl	ctrl	0
14	1800	14	527	9	2	fca1	ctrl	ctrl	0
15	1387	12	527	9	2	fca1	ctrl	ctrl	0
17	6868	30	527	9	2	fca1	ctrl	ctrl	0
20	6720	38	527	9	2	fca1	ctrl	ctrl	0
25	2145	9	527	9	2	fca1	ctrl	ctrl	0
27	2715	19	527	9	2	fca1	ctrl	ctrl	0
30	5113	14	527	9	2	fca1	ctrl	ctrl	0
32	4133	17	527	9	2	fca1	ctrl	ctrl	0
34	4255	13	527	9	2	fca1	ctrl	ctrl	0
41	2493	18	527	9	2	fca1	ctrl	ctrl	0
42	4111	16	527	9	2	fca1	ctrl	ctrl	0
45	3864	8	527	9	2	fca1	ctrl	ctrl	0
51	7757	33	527	9	2	fca1	ctrl	ctrl	0
54	6347	45	527	9	2	fca1	ctrl	ctrl	0
56	4096	19	527	9	2	fca1	ctrl	ctrl	0
58	4108	31	527	9	2	fca1	ctrl	ctrl	0
61	4449	29	527	9	2	fca1	ctrl	ctrl	0
64	6239	13	527	9	2	fca1	ctrl	ctrl	0
65	3384	19	527	9	2	fca1	ctrl	ctrl	0
67	2398	14	527	9	2	fca1	ctrl	ctrl	0
70	3643	24	527	9	2	fca1	ctrl	ctrl	0
72	2125	16	527	9	2	fca1	ctrl	ctrl	0
74	5551	30	527	9	2	fca1	ctrl	ctrl	0
75	2300	14	527	9	2	fca1	ctrl	ctrl	0
77	3926	15	527	9	2	fca1	ctrl	ctrl	0
81	4827	18	527	9	2	fca1	ctrl	ctrl	0
82	4391	7	527	9	2	fca1	ctrl	ctrl	0
83	5820	20	527	9	2	fca1	ctrl	ctrl	0
84	2543	9	527	9	2	fca1	ctrl	ctrl	0
3	6485	17	528	9	2	fca1	ctrl	ctrl	0
8	5729	41	528	9	2	fca1	ctrl	ctrl	0
11	5141	22	528	9	2	fca1	ctrl	ctrl	0
14	1826	10	528	9	2	fca1	ctrl	ctrl	0
15	4622	28	528	9	2	fca1	ctrl	ctrl	0
20	2234	6	528	9	2	fca1	ctrl	ctrl	0
21	3064	21	528	9	2	fca1	ctrl	ctrl	0
22	3832	18	528	9	2	fca1	ctrl	ctrl	0
24	4122	33	528	9	2	fca1	ctrl	ctrl	0
25	5769	11	528	9	2	fca1	ctrl	ctrl	0
27	3096	11	528	9	2	fca1	ctrl	ctrl	0
29	3421	10	528	9	2	fca1	ctrl	ctrl	0
30	1780	15	528	9	2	fca1	ctrl	ctrl	0
32	1972	7	528	9	2	fca1	ctrl	ctrl	0
33	2937	3	528	9	2	fca1	ctrl	ctrl	0
34	3228	8	528	9	2	fca1	ctrl	ctrl	0
36	5767	35	528	9	2	fca1	ctrl	ctrl	0
37	3647	21	528	9	2	fca1	ctrl	ctrl	0
38	5251	26	528	9	2	fca1	ctrl	ctrl	0
39	5668	43	528	9	2	fca1	ctrl	ctrl	0
40	3549	30	528	9	2	fca1	ctrl	ctrl	0
41	6602	46	528	9	2	fca1	ctrl	ctrl	0
42	7331	33	528	9	2	fca1	ctrl	ctrl	0
43	4106	27	528	9	2	fca1	ctrl	ctrl	0
45	6260	30	528	9	2	fca1	ctrl	ctrl	0
48	3779	23	528	9	2	fca1	ctrl	ctrl	0
49	4822	7	528	9	2	fca1	ctrl	ctrl	0
52	6180	33	528	9	2	fca1	ctrl	ctrl	0
55	2779	13	528	9	2	fca1	ctrl	ctrl	0
1	7173	23	529	9	2	fca1	ctrl	ctrl	0
5	8788	41	529	9	2	fca1	ctrl	ctrl	0
6	5080	23	529	9	2	fca1	ctrl	ctrl	0
9	7443	75	529	9	2	fca1	ctrl	ctrl	0
10	7670	39	529	9	2	fca1	ctrl	ctrl	0
11	28011	148	529	9	2	fca1	ctrl	ctrl	0
12	7373	31	529	9	2	fca1	ctrl	ctrl	0
14	5815	31	529	9	2	fca1	ctrl	ctrl	0
15	7566	31	529	9	2	fca1	ctrl	ctrl	0
16	5624	14	529	9	2	fca1	ctrl	ctrl	0
17	6507	24	529	9	2	fca1	ctrl	ctrl	0
19	6664	37	529	9	2	fca1	ctrl	ctrl	0
20	5456	24	529	9	2	fca1	ctrl	ctrl	0
24	5200	26	529	9	2	fca1	ctrl	ctrl	0
25	5469	11	529	9	2	fca1	ctrl	ctrl	0
26	18318	73	529	9	2	fca1	ctrl	ctrl	0
3	7844	69	530	9	2	fca1	ctrl	ctrl	0
7	9142	46	530	9	2	fca1	ctrl	ctrl	0
9	5892	44	530	9	2	fca1	ctrl	ctrl	0
11	10427	28	530	9	2	fca1	ctrl	ctrl	0
12	8865	51	530	9	2	fca1	ctrl	ctrl	0
13	4181	15	530	9	2	fca1	ctrl	ctrl	0
14	9413	28	530	9	2	fca1	ctrl	ctrl	0
15	5807	29	530	9	2	fca1	ctrl	ctrl	0
16	5640	29	530	9	2	fca1	ctrl	ctrl	0
17	4468	16	530	9	2	fca1	ctrl	ctrl	0
[truncated: 9,082 more rows]

## Sheet: Venus_time_course
mean_intensity	cell_voxels	X	Y	Z	z_mean	sphere_fit_centroid	mean_in_sphere	mean_outside_sphere	overlap_fraction	region_id	file_id	root	genotype	tissue	replicate	timepoint	flag	notes	sphere_filled
0.57	250363	144	120	85	0.6	(150, 117, 84)	1.37	0.54	1	13	1	1	fca-1	epidermis	exp1	7			0.83
0.6	178970	135	331	102	0.63	(142, 335, 104)	1.1	0.57	1	31	1	1	fca-1	epidermis	exp1	7			0.53
0.75	141529	137	395	101	0.64	(140, 395, 103)	1.61	0.69	1	40	1	1	fca-1	epidermis	exp1	7			0.92
1.12	136795	135	454	102	0.63	(137, 458, 103)	3.16	0.95	1	42	1	1	fca-1	epidermis	exp1	7			2.21
1.2	132502	137	509	105	0.63	(136, 512, 112)	3.21	1.01	1	45	1	1	fca-1	epidermis	exp1	7			2.2
0.63	128855	145	205	89	0.61	(150, 211, 93)	1.2	0.58	1	48	1	1	fca-1	epidermis	exp1	7			0.62
1.16	122025	136	563	107	0.64	(139, 568, 110)	2.7	1.03	1	52	1	1	fca-1	epidermis	exp1	7			1.67
1.42	106792	139	610	111	0.66	(141, 612, 115)	4.01	1.12	0.98	63	1	1	fca-1	epidermis	exp1	7			2.97184
1.34	97749	145	700	108	0.64	(147, 701, 113)	3.13	1.13	1	76	1	1	fca-1	epidermis	exp1	7			2
1.21	122314	140	657	107	0.64	(145, 657, 111)	3.44	1.02	0.97	92	1	1	fca-1	epidermis	exp1	7			2.52639
1.34	69007	150	733	103	0.64	(146, 735, 112)	2.28	1.16	0.92	128	1	1	fca-1	epidermis	exp1	7			1.31826
1.15	61549	157	865	111	0.66	(154, 866, 117)	2.01	0.97	0.83	144	1	1	fca-1	epidermis	exp1	7			1.45169
1.32	60926	155	820	106	0.62	(156, 821, 109)	2.32	1.07	0.88	146	1	1	fca-1	epidermis	exp1	7			1.56636
1.72	51979	149	778	106	0.62	(147, 779, 110)	2.96	1.34	0.87	176	1	1	fca-1	epidermis	exp1	7			2.0623
1.52	50275	151	756	109	0.62	(152, 756, 109)	2.48	1.26	0.85	183	1	1	fca-1	epidermis	exp1	7			1.65765
1.61	48366	153	799	108	0.64	(154, 799, 110)	2.61	1.24	0.85	187	1	1	fca-1	epidermis	exp1	7			1.83059
0.94	48621	157	887	114	0.65	(160, 889, 121)	1.25	0.86	0.56	189	1	1	fca-1	epidermis	exp1	7			1.37214
1.21	47687	157	842	113	0.62	(159, 842, 119)	1.85	0.97	0.69	191	1	1	fca-1	epidermis	exp1	7			1.71116
0.59	116448	145	261	90	0.62	(148, 260, 85)	1.09	0.55	0.94	197	1	1	fca-1	epidermis	exp1	7			0.609574
1.09	44615	164	928	113	0.62	(160, 930, 123)	1.47	0.97	0.42	208	1	1	fca-1	epidermis	exp1	7			2.53
1.16	40004	165	948	114	0.65	(164, 950, 121)	1.69	0.93	0.55	224	1	1	fca-1	epidermis	exp1	7			2.14273
1.1	44122	161	908	113	0.62	(163, 910, 121)	1.66	0.91	0.56	228	1	1	fca-1	epidermis	exp1	7			2.05429
1.14	31331	165	968	119	0.61	(166, 969, 123)	1.46	0.91	0.41	265	1	1	fca-1	epidermis	exp1	7			2.65098
2.33	30728	167	986	117	0.64	(168, 987, 120)	3.55	1.58	0.56	268	1	1	fca-1	epidermis	exp1	7			4.75929
1.04	224521	164	330	57	0.55	(170, 338, 64)	4.94	0.88	0.94	46	2	1	fca-1	epidermis	exp1	7			4.37532
1.49	122473	166	616	69	0.59	(172, 617, 70)	4.92	1.19	1	51	2	1	fca-1	epidermis	exp1	7			3.73
1.11	103312	164	425	62	0.56	(171, 431, 68)	3.25	0.9	0.96	96	2	1	fca-1	epidermis	exp1	7			2.48542
1.17	219552	171	205	48	0.47	(178, 209, 52)	5.63	0.98	0.94	107	2	1	fca-1	epidermis	exp1	7			5.00936
0.92	142977	173	72	49	0.49	(181, 78, 57)	4.43	0.69	0.89	109	2	1	fca-1	epidermis	exp1	7			4.28753
1.41	90059	162	486	64	0.58	(165, 492, 71)	4.69	1.05	0.94	112	2	1	fca-1	epidermis	exp1	7			3.93936
2.12	72750	186	836	76	0.61	(188, 838, 78)	6.16	1.51	1	118	2	1	fca-1	epidermis	exp1	7			4.65
2.08	56578	200	1004	97	0.66	(203, 1006, 95)	4.74	1.51	0.62	159	2	1	fca-1	epidermis	exp1	7			6.13516
1.91	50390	196	925	82	0.59	(196, 928, 87)	4.28	1.34	0.99	182	2	1	fca-1	epidermis	exp1	7			2.98323
2.23	62642	190	880	79	0.59	(193, 883, 79)	5.88	1.62	0.95	195	2	1	fca-1	epidermis	exp1	7			4.56947
1.7	71252	171	671	67	0.59	(176, 675, 75)	4.51	1.29	0.95	202	2	1	fca-1	epidermis	exp1	7			3.45737
2.6	64722	178	754	73	0.6	(180, 757, 72)	7.6	1.82	0.92	216	2	1	fca-1	epidermis	exp1	7			6.44087
2.03	63448	182	790	71	0.59	(188, 794, 73)	5.34	1.48	0.95	219	2	1	fca-1	epidermis	exp1	7			4.14105
2.03	61484	175	712	69	0.59	(178, 715, 74)	5.54	1.43	0.95	242	2	1	fca-1	epidermis	exp1	7			4.40158
1.7	98164	166	551	66	0.58	(171, 552, 71)	6.23	1.26	0.91	261	2	1	fca-1	epidermis	exp1	7			5.58615
2.02	44408	197	964	86	0.61	(198, 965, 90)	4.26	1.45	0.95	273	2	1	fca-1	epidermis	exp1	7			3.03421
0.79	103503	207	362	39	0.43	(211, 364, 46)	1.77	0.68	0.97	66	3	1	fca-1	epidermis	exp1	7			1.14474
1.68	102460	206	614	48	0.47	(209, 616, 56)	5.3	1.3	1	71	3	1	fca-1	epidermis	exp1	7			4
1.26	96779	205	546	47	0.48	(209, 549, 52)	3.4	1.02	0.99	79	3	1	fca-1	epidermis	exp1	7			2.41434
0.76	145778	212	115	27	0.3	(216, 124, 38)	2.61	0.64	0.93	88	3	1	fca-1	epidermis	exp1	7			2.16645
1.37	84443	212	681	49	0.49	(215, 683, 52)	3.59	1.09	1	97	3	1	fca-1	epidermis	exp1	7			2.5
0.96	78160	203	427	43	0.44	(205, 430, 51)	2.07	0.8	0.99	106	3	1	fca-1	epidermis	exp1	7			1.29091
1.08	73881	221	799	58	0.54	(222, 800, 60)	2.08	0.94	1	114	3	1	fca-1	epidermis	exp1	7			1.14
0.87	89941	206	291	34	0.35	(207, 299, 43)	1.97	0.73	0.87	122	3	1	fca-1	epidermis	exp1	7			1.53437
1.07	90846	202	482	45	0.45	(204, 484, 52)	2.74	0.88	0.97	132	3	1	fca-1	epidermis	exp1	7			1.94474
0.84	124857	212	204	29	0.35	(213, 213, 38)	2.56	0.71	0.93	137	3	1	fca-1	epidermis	exp1	7			2.04269
1.52	58262	228	903	67	0.59	(230, 904, 66)	3.24	1.18	1	151	3	1	fca-1	epidermis	exp1	7			2.06
1.28	83714	216	742	51	0.5	(217, 743, 56)	3.01	1.06	0.98	152	3	1	fca-1	epidermis	exp1	7			2.01143
1.2	64951	236	989	77	0.6	(237, 991, 79)	2.49	1.01	0.97	193	3	1	fca-1	epidermis	exp1	7			1.55701
1.31	55467	232	945	70	0.61	(231, 947, 72)	2.68	1.05	0.95	198	3	1	fca-1	epidermis	exp1	7			1.77105
1.13	78286	224	852	65	0.57	(227, 853, 64)	2.36	0.97	0.94	239	3	1	fca-1	epidermis	exp1	7			1.54064
0.63	251500	262	87	35	0.37	(261, 90, 43)	1.71	0.58	1	11	4	1	fca-1	epidermis	exp1	7			1.13
1.06	230928	255	295	38	0.39	(256, 300, 43)	3.44	0.95	1	15	4	1	fca-1	epidermis	exp1	7			2.49
0.99	214014	255	363	40	0.42	(264, 367, 45)	2.83	0.91	1	20	4	1	fca-1	epidermis	exp1	7			1.92
0.64	189342	262	224	33	0.36	(261, 230, 41)	1.49	0.6	1	24	4	1	fca-1	epidermis	exp1	7			0.89
0.77	187125	263	161	36	0.41	(262, 166, 38)	1.88	0.71	1	26	4	1	fca-1	epidermis	exp1	7			1.17
1.2	121282	255	417	42	0.44	(256, 421, 50)	3.39	1.01	1	53	4	1	fca-1	epidermis	exp1	7			2.38
0.98	108910	254	592	47	0.48	(255, 593, 54)	2.09	0.87	1	59	4	1	fca-1	epidermis	exp1	7			1.22
1.45	108743	255	453	42	0.44	(255, 456, 51)	4.09	1.2	1	61	4	1	fca-1	epidermis	exp1	7			2.89
1.13	106464	252	556	47	0.48	(252, 560, 52)	2.76	0.97	1	64	4	1	fca-1	epidermis	exp1	7			1.79
1.4	105370	260	689	53	0.55	(262, 688, 58)	3.79	1.16	1	65	4	1	fca-1	epidermis	exp1	7			2.63
1.21	103036	263	721	54	0.53	(265, 723, 57)	2.95	1.03	0.99	68	4	1	fca-1	epidermis	exp1	7			1.9498
1.08	99991	251	488	45	0.45	(252, 491, 53)	2.6	0.92	1	73	4	1	fca-1	epidermis	exp1	7			1.68
1.04	96939	252	520	47	0.48	(251, 520, 53)	2.5	0.87	0.99	78	4	1	fca-1	epidermis	exp1	7			1.65525
1.21	93910	257	654	49	0.49	(256, 655, 53)	2.77	1.03	1	84	4	1	fca-1	epidermis	exp1	7			1.74
1.1	90468	255	624	49	0.49	(257, 626, 52)	2.25	0.97	0.99	90	4	1	fca-1	epidermis	exp1	7			1.30273
1.18	80510	278	990	88	0.61	(280, 991, 87)	2.55	0.99	1	102	4	1	fca-1	epidermis	exp1	7			1.56
1.33	76032	263	751	57	0.55	(264, 752, 62)	2.92	1.1	0.97	110	4	1	fca-1	epidermis	exp1	7			1.91031
1.28	73243	263	777	57	0.55	(266, 778, 62)	2.82	1.04	0.95	115	4	1	fca-1	epidermis	exp1	7			1.92842
0.88	64548	269	801	67	0.59	(267, 802, 68)	1.4	0.77	0.84	138	4	1	fca-1	epidermis	exp1	7			0.896667
0.86	61176	266	822	68	0.58	(269, 822, 74)	1.21	0.77	0.83	145	4	1	fca-1	epidermis	exp1	7			0.687831
0.9	57420	269	880	69	0.59	(272, 881, 74)	1.28	0.79	0.81	158	4	1	fca-1	epidermis	exp1	7			0.790247
1.23	56490	269	842	68	0.58	(269, 843, 68)	2.12	1.01	0.81	160	4	1	fca-1	epidermis	exp1	7			1.60728
0.84	51951	271	861	69	0.59	(272, 861, 72)	1.03	0.75	0.72	177	4	1	fca-1	epidermis	exp1	7			0.680556
1.13	48208	272	917	73	0.6	(273, 918, 76)	1.62	0.95	0.74	188	4	1	fca-1	epidermis	exp1	7			1.23919
0.93	47559	272	899	74	0.61	(272, 899, 78)	1.16	0.82	0.75	192	4	1	fca-1	epidermis	exp1	7			0.726667
1.2	74628	275	958	81	0.61	(277, 959, 81)	2.69	0.99	0.96	210	4	1	fca-1	epidermis	exp1	7			1.81208
0.99	43449	273	934	76	0.61	(271, 935, 83)	1.23	0.86	0.76	220	4	1	fca-1	epidermis	exp1	7			0.758421
0.51	256945	315	68	31	0.33	(312, 76, 44)	1.54	0.46	0.97	12	5	1	fca-1	epidermis	exp1	7			1.12763
0.72	187120	309	285	33	0.36	(305, 297, 45)	2.04	0.65	1	27	5	1	fca-1	epidermis	exp1	7			1.39
0.67	219774	315	182	33	0.36	(311, 191, 44)	1.99	0.61	0.95	36	5	1	fca-1	epidermis	exp1	7			1.48474
1.27	138818	306	487	40	0.42	(299, 492, 49)	4.61	1.03	0.99	41	5	1	fca-1	epidermis	exp1	7			3.62657
0.95	102842	306	418	38	0.39	(303, 421, 45)	2.23	0.81	1	70	5	1	fca-1	epidermis	exp1	7			1.42
0.96	93483	307	364	37	0.38	(308, 365, 44)	2.31	0.8	1	87	5	1	fca-1	epidermis	exp1	7			1.51
1.23	130650	303	557	42	0.44	(302, 561, 48)	3.94	1.03	0.95	91	5	1	fca-1	epidermis	exp1	7			3.11737
0.89	120777	309	624	44	0.44	(308, 633, 53)	2	0.8	0.95	101	5	1	fca-1	epidermis	exp1	7			1.30526
1.13	79260	315	893	79	0.59	(317, 890, 71)	1.23	1.12	1	104	5	1	fca-1	epidermis	exp1	7			0.11
1.18	72439	317	776	57	0.55	(317, 779, 61)	2.58	0.96	1	119	5	1	fca-1	epidermis	exp1	7			1.62
1.26	70817	317	743	53	0.55	(316, 747, 61)	2.74	1.02	0.99	126	5	1	fca-1	epidermis	exp1	7			1.74768
1.13	68399	309	675	49	0.49	(310, 674, 53)	2.42	0.92	1	129	5	1	fca-1	epidermis	exp1	7			1.5
1.23	65641	322	810	59	0.56	(320, 810, 68)	2.53	1.01	0.98	134	5	1	fca-1	epidermis	exp1	7			1.57163
1.08	60350	314	708	50	0.5	(315, 712, 55)	2.05	0.89	0.99	148	5	1	fca-1	epidermis	exp1	7			1.18071
1.29	74725	321	842	62	0.56	(316, 842, 69)	3.02	1.05	0.95	217	5	1	fca-1	epidermis	exp1	7			2.12895
1.47	38509	317	937	81	0.61	(316, 935, 83)	2.48	1.13	0.99	230	5	1	fca-1	epidermis	exp1	7			1.37505
1.26	37060	317	965	81	0.61	(319, 966, 86)	1.95	1.02	0.96	243	5	1	fca-1	epidermis	exp1	7			1.01125
0.64	258275	349	123	60	0.57	(347, 132, 63)	2.28	0.58	1	18	6	1	fca-1	epidermis	exp1	7			1.7
0.74	137262	341	379	59	0.56	(339, 384, 63)	1.87	0.66	0.98	47	6	1	fca-1	epidermis	exp1	7			1.24816
0.58	140238	352	239	56	0.54	(347, 247, 62)	1.19	0.54	0.99	49	6	1	fca-1	epidermis	exp1	7			0.66202
0.53	117633	346	312	56	0.54	(342, 319, 66)	0.66	0.52	1	56	6	1	fca-1	epidermis	exp1	7			0.14
0.71	99424	345	634	69	0.59	(342, 637, 74)	1.23	0.66	0.97	105	6	1	fca-1	epidermis	exp1	7			0.608041
0.58	101980	342	512	62	0.56	(337, 515, 67)	0.66	0.57	0.95	123	6	1	fca-1	epidermis	exp1	7			0.124737
0.85	121624	341	445	57	0.55	(338, 448, 63)	2.32	0.73	0.95	133	6	1	fca-1	epidermis	exp1	7			1.71211
0.91	100851	340	570	63	0.6	(340, 575, 70)	2.41	0.77	0.93	142	6	1	fca-1	epidermis	exp1	7			1.8214
0.8	58057	344	682	73	0.6	(342, 683, 78)	1.37	0.69	1	154	6	1	fca-1	epidermis	exp1	7			0.68
1.88	56148	348	754	81	0.61	(351, 754, 82)	4.38	1.36	0.99	162	6	1	fca-1	epidermis	exp1	7			3.06424
1.97	50639	352	889	92	0.61	(354, 889, 92)	4.3	1.42	0.98	180	6	1	fca-1	epidermis	exp1	7			2.96776
1.61	51069	350	856	89	0.61	(350, 856, 89)	3.22	1.24	0.99	196	6	1	fca-1	epidermis	exp1	7			2.01253
0.88	46170	350	714	74	0.61	(348, 714, 76)	1.34	0.76	1	201	6	1	fca-1	epidermis	exp1	7			0.58
2.22	44403	351	921	91	0.63	(352, 922, 94)	4.6	1.56	0.99	209	6	1	fca-1	epidermis	exp1	7			3.08646
1.8	39916	349	949	97	0.66	(352, 950, 96)	3.33	1.32	0.98	225	6	1	fca-1	epidermis	exp1	7			2.07796
1.59	44663	350	823	87	0.63	(351, 824, 87)	3.02	1.21	0.97	231	6	1	fca-1	epidermis	exp1	7			1.9034
1.82	51669	347	790	83	0.61	(349, 790, 82)	4.15	1.32	0.94	247	6	1	fca-1	epidermis	exp1	7			3.09489
1.6	34152	347	975	102	0.63	(351, 976, 101)	2.52	1.21	0.92	248	6	1	fca-1	epidermis	exp1	7			1.52913
0.48	210726	373	96	98	0.64	(371, 99, 93)	0.98	0.46	1	22	7	1	fca-1	epidermis	exp1	7			0.52
0.58	183365	374	173	97	0.66	(371, 175, 98)	1.33	0.54	1	28	7	1	fca-1	epidermis	exp1	7			0.79
0.59	162369	370	309	95	0.62	(367, 313, 96)	1.18	0.55	1	33	7	1	fca-1	epidermis	exp1	7			0.63
0.6	161393	374	242	96	0.62	(371, 248, 95)	1.27	0.55	1	34	7	1	fca-1	epidermis	exp1	7			0.72
0.57	147096	368	367	96	0.62	(366, 371, 100)	0.95	0.54	1	38	7	1	fca-1	epidermis	exp1	7			0.41
0.86	152040	366	597	100	0.64	(368, 598, 104)	1.96	0.78	1	39	7	1	fca-1	epidermis	exp1	7			1.18
0.64	155403	366	425	96	0.62	(367, 425, 96)	1.22	0.6	0.95	50	7	1	fca-1	epidermis	exp1	7			0.684211
0.96	145370	366	541	98	0.64	(362, 542, 103)	2.53	0.85	0.96	58	7	1	fca-1	epidermis	exp1	7			1.78542
0.8	148007	366	484	98	0.64	(364, 485, 97)	1.82	0.73	0.95	99	7	1	fca-1	epidermis	exp1	7			1.18579
0.81	74535	367	670	104	0.66	(367, 671, 110)	1.39	0.7	1	111	7	1	fca-1	epidermis	exp1	7			0.69
0.97	72373	370	641	104	0.66	(369, 643, 108)	1.92	0.82	0.98	120	7	1	fca-1	epidermis	exp1	7			1.13918
1.09	71572	369	700	106	0.62	(368, 701, 108)	2.24	0.88	0.99	121	7	1	fca-1	epidermis	exp1	7			1.38263
1.36	65410	368	765	111	0.66	(368, 767, 113)	2.77	1.09	1	135	7	1	fca-1	epidermis	exp1	7			1.68
1.11	57802	367	729	107	0.64	(366, 730, 111)	2.13	0.89	1	156	7	1	fca-1	epidermis	exp1	7			1.24
1.52	55512	369	797	112	0.63	(369, 798, 119)	2.96	1.18	0.8	165	7	1	fca-1	epidermis	exp1	7			2.52
1.53	55437	371	828	114	0.65	(371, 828, 119)	3.04	1.17	0.81	166	7	1	fca-1	epidermis	exp1	7			2.58309
1.4	44682	370	912	116	0.62	(372, 911, 123)	2.4	1.11	0.51	207	7	1	fca-1	epidermis	exp1	7			3.59588
1.61	44165	369	856	117	0.64	(369, 857, 121)	2.95	1.22	0.64	214	7	1	fca-1	epidermis	exp1	7			3.38938
1.69	37399	372	968	121	0.64	(369, 967, 123)	3.03	1.17	0.48	249	7	1	fca-1	epidermis	exp1	7			5.1425
1.88	44937	370	885	117	0.64	(369, 885, 123)	3.51	1.48	0.51	279	7	1	fca-1	epidermis	exp1	7			5.40235
1.4	36097	373	939	118	0.63	(373, 940, 123)	2.17	1.07	0.48	340	7	1	fca-1	epidermis	exp1	7			3.45083
0.69	323582	211	143	90	0.62	(208, 148, 83)	3.21	0.62	1	5	8	1	fca-1	cortex	exp1	7			2.59
0.76	316836	215	219	94	0.65	(212, 215, 85)	3.49	0.69	1	6	8	1	fca-1	cortex	exp1	7			2.8
0.86	279278	206	288	94	0.65	(211, 286, 88)	3.95	0.76	1	9	8	1	fca-1	cortex	exp1	7			3.19
1.03	225916	206	358	92	0.61	(207, 361, 92)	4.24	0.89	1	16	8	1	fca-1	cortex	exp1	7			3.35
0.54	451081	213	47	94	0.65	(208, 49, 82)	2.92	0.51	0.91	19	8	1	fca-1	cortex	exp1	7			2.69879
0.88	133325	204	414	94	0.65	(204, 418, 93)	2.63	0.75	0.99	55	8	1	fca-1	cortex	exp1	7			1.90657
1.09	108623	206	480	98	0.64	(209, 484, 94)	3.19	0.89	0.99	62	8	1	fca-1	cortex	exp1	7			2.33222
1.07	103497	204	547	100	0.64	(203, 551, 99)	2.66	0.92	0.98	67	8	1	fca-1	cortex	exp1	7			1.79429
1.03	102871	206	514	97	0.66	(203, 513, 97)	2.66	0.86	1	69	8	1	fca-1	cortex	exp1	7			1.8
0.83	104108	206	447	98	0.64	(210, 448, 98)	2	0.72	0.99	75	8	1	fca-1	cortex	exp1	7			1.3002
1.43	96558	209	614	102	0.63	(209, 616, 100)	3.97	1.16	0.99	80	8	1	fca-1	cortex	exp1	7			2.8501
1.06	96179	207	582	101	0.64	(209, 581, 103)	2.51	0.91	1	81	8	1	fca-1	cortex	exp1	7			1.6
1.35	88047	210	645	101	0.64	(211, 644, 102)	3.49	1.11	0.99	94	8	1	fca-1	cortex	exp1	7			2.41525
1.34	71361	218	747	103	0.64	(222, 748, 102)	3.07	1.1	0.98	125	8	1	fca-1	cortex	exp1	7			2.03265
1.28	67507	219	773	103	0.64	(222, 774, 107)	2.68	1.04	0.9	131	8	1	fca-1	cortex	exp1	7			1.93778
0.98	65737	215	722	103	0.64	(220, 724, 106)	1.76	0.85	0.91	136	8	1	fca-1	cortex	exp1	7			1.08407
1.24	84738	212	674	99	0.62	(217, 674, 102)	2.92	1.04	0.97	140	8	1	fca-1	cortex	exp1	7			1.97031
1.41	64632	221	825	110	0.64	(225, 825, 114)	3.13	1.03	0.97	150	8	1	fca-1	cortex	exp1	7			2.1968
1.14	68900	213	699	100	0.64	(216, 700, 102)	2.15	0.96	0.92	168	8	1	fca-1	cortex	exp1	7			1.37696
1.45	67473	222	797	104	0.66	(222, 799, 110)	3.27	1.15	0.96	178	8	1	fca-1	cortex	exp1	7			2.25625
0.97	53672	225	878	113	0.62	(226, 879, 119)	1.51	0.82	0.7	179	8	1	fca-1	cortex	exp1	7			1.33714
1.13	51291	225	902	113	0.62	(226, 903, 119)	2.03	0.88	0.75	186	8	1	fca-1	cortex	exp1	7			1.82667
1.23	68359	225	853	112	0.63	(223, 853, 115)	2.56	0.95	0.92	203	8	1	fca-1	cortex	exp1	7			1.83261
1.32	41586	229	973	118	0.63	(230, 974, 123)	2.22	1.07	0.48	218	8	1	fca-1	cortex	exp1	7			3.555
1.07	46794	229	949	117	0.64	(225, 950, 123)	1.82	0.87	0.48	238	8	1	fca-1	cortex	exp1	7			2.92167
1.18	42931	231	926	114	0.65	(230, 927, 118)	1.95	0.89	0.77	240	8	1	fca-1	cortex	exp1	7			1.64247
1.24	30181	233	996	122	0.62	(229, 997, 123)	1.83	0.92	0.48	274	8	1	fca-1	cortex	exp1	7			2.8925
0.7	279261	299	222	97	0.66	(301, 221, 100)	2.69	0.63	1	7	9	1	fca-1	cortex	exp1	7			2.06
0.6	311916	296	46	101	0.64	(301, 54, 98)	3	0.53	1	8	9	1	fca-1	cortex	exp1	7			2.47
0.78	276068	293	274	99	0.62	(296, 273, 95)	3.25	0.71	1	10	9	1	fca-1	cortex	exp1	7			2.54
0.73	234188	299	170	101	0.64	(302, 170, 93)	3.12	0.64	1	14	9	1	fca-1	cortex	exp1	7			2.48
0.58	320440	296	112	99	0.62	(296, 119, 100)	2.5	0.52	0.94	17	9	1	fca-1	cortex	exp1	7			2.13957
0.89	210120	292	324	100	0.64	(297, 321, 99)	3.26	0.79	0.98	23	9	1	fca-1	cortex	exp1	7			2.53653
0.93	208502	294	365	101	0.64	(296, 364, 100)	3.39	0.83	1	25	9	1	fca-1	cortex	exp1	7			2.56
1.04	195853	293	457	100	0.64	(289, 460, 102)	3.84	0.91	0.99	29	9	1	fca-1	cortex	exp1	7			2.96879
1.26	182887	291	550	104	0.66	(292, 550, 105)	4.86	1.09	1	30	9	1	fca-1	cortex	exp1	7			3.77
1.28	186779	291	506	102	0.63	(291, 504, 100)	5.27	1.09	1	32	9	1	fca-1	cortex	exp1	7			4.18
1.09	95658	291	585	105	0.63	(296, 585, 106)	2.55	0.93	0.88	83	9	1	fca-1	cortex	exp1	7			1.96773
0.97	189095	292	410	101	0.64	(294, 412, 100)	3.49	0.87	0.92	93	9	1	fca-1	cortex	exp1	7			2.92348
1.3	84293	292	629	104	0.66	(296, 629, 107)	3.16	1.04	0.94	98	9	1	fca-1	cortex	exp1	7			2.3217
1.18	81754	293	606	102	0.63	(298, 606, 97)	2.66	1	0.85	108	9	1	fca-1	cortex	exp1	7			2.12941
1.2	70512	291	667	104	0.66	(293, 668, 111)	2.44	0.95	0.85	124	9	1	fca-1	cortex	exp1	7			1.92059
1.21	68317	300	726	109	0.62	(302, 726, 109)	2.24	0.99	0.81	130	9	1	fca-1	cortex	exp1	7			1.77543
1.11	59485	293	708	108	0.64	(298, 707, 105)	1.75	0.93	0.77	149	9	1	fca-1	cortex	exp1	7			1.34273
1.33	55801	300	764	107	0.64	(302, 765, 111)	1.57	1.24	0.81	163	9	1	fca-1	cortex	exp1	7			0.698272
1.21	52891	300	821	111	0.66	(300, 822, 122)	2.12	0.97	0.47	171	9	1	fca-1	cortex	exp1	7			3.54064
1.22	52204	299	784	110	0.64	(300, 784, 116)	1.98	0.92	0.67	175	9	1	fca-1	cortex	exp1	7			2.03522
1.33	59286	300	745	109	0.62	(301, 745, 108)	1.6	1.24	0.72	194	9	1	fca-1	cortex	exp1	7			0.982222
1.02	62923	297	688	108	0.64	(296, 688, 108)	1.68	0.89	0.83	199	9	1	fca-1	cortex	exp1	7			1.1341
1.43	46252	299	857	115	0.64	(303, 858, 121)	2.38	1.14	0.51	200	9	1	fca-1	cortex	exp1	7			3.52667
1.34	57069	297	648	106	0.62	(302, 649, 105)	2.29	1.13	0.73	212	9	1	fca-1	cortex	exp1	7			2.00699
1.3	43111	299	839	113	0.62	(305, 840, 120)	1.89	1.02	0.52	215	9	1	fca-1	cortex	exp1	7			2.61462
1.4	40454	300	874	114	0.65	(304, 875, 123)	2.17	1.1	0.38	222	9	1	fca-1	cortex	exp1	7			4.61053
1.21	45188	303	801	113	0.62	(308, 802, 119)	1.83	0.96	0.62	236	9	1	fca-1	cortex	exp1	7			1.99161
1.62	26794	294	943	120	0.62	(302, 944, 123)	2.31	0.99	0.36	285	9	1	fca-1	cortex	exp1	7			5.42667
1.73	30369	298	927	119	0.61	(308, 928, 123)	2.64	1.15	0.39	298	9	1	fca-1	cortex	exp1	7			5.61923
1.67	31398	297	911	120	0.62	(300, 911, 123)	2.72	1.08	0.38	303	9	1	fca-1	cortex	exp1	7			6.07789
1.05	21043	299	960	121	0.64	(306, 960, 123)	0.97	0.89	0.38	322	9	1	fca-1	cortex	exp1	7			1.66263
1.51	32059	297	892	119	0.61	(305, 893, 123)	2.55	0.97	0.38	351	9	1	fca-1	cortex	exp1	7			5.74053
1.05	20005	289	975	121	0.64	(302, 977, 123)	1.05	0.83	0.36	411	9	1	fca-1	cortex	exp1	7			2.08667
0.25	388329	107	67	118	0.27	(124, 75, 123)	0.46	0.24	0.97	6	1	1	fca-3	epidermis	exp1	7			0.234227
0.28	318269	98	182	120	0.29	(110, 191, 125)	0.45	0.28	1	13	1	1	fca-3	epidermis	exp1	7			0.17
0.34	249176	95	288	123	0.28	(102, 291, 114)	0.61	0.34	1	25	1	1	fca-3	epidermis	exp1	7			0.27
0.36	207074	90	373	125	0.26	(96, 380, 119)	0.49	0.35	1	36	1	1	fca-3	epidermis	exp1	7			0.14
0.38	189542	92	443	128	0.26	(94, 451, 106)	0.48	0.38	0.98	42	1	1	fca-3	epidermis	exp1	7			0.109796
0.39	182989	96	504	131	0.27	(101, 506, 123)	0.52	0.39	1	50	1	1	fca-3	epidermis	exp1	7			0.13
0.4	171288	102	565	136	0.25	(106, 568, 137)	0.53	0.4	1	54	1	1	fca-3	epidermis	exp1	7			0.13
0.35	144720	108	617	138	0.26	(97, 611, 126)	0.42	0.36	0.99	63	1	1	fca-3	epidermis	exp1	7			0.0642424
0.42	69137	108	657	145	0.23	(113, 657, 149)	0.57	0.41	0.94	149	1	1	fca-3	epidermis	exp1	7			0.196383
0.4	68837	112	684	142	0.24	(115, 684, 126)	0.44	0.4	0.98	150	1	1	fca-3	epidermis	exp1	7			0.0489796
0.33	65401	116	714	144	0.28	(122, 714, 127)	0.37	0.33	0.97	158	1	1	fca-3	epidermis	exp1	7			0.0514433
0.38	47887	118	739	147	0.24	(115, 740, 137)	0.4	0.38	0.95	188	1	1	fca-3	epidermis	exp1	7			0.0410526
0.43	35618	120	765	150	0.24	(121, 764, 149)	0.43	0.42	0.84	231	1	1	fca-3	epidermis	exp1	7			0.0919048
0.41	34613	126	786	149	0.22	(114, 788, 151)	0.38	0.42	0.75	235	1	1	fca-3	epidermis	exp1	7			0.0866667
0.56	32126	132	827	150	0.24	(130, 827, 156)	0.61	0.52	0.45	244	1	1	fca-3	epidermis	exp1	7			0.835556
0.64	29768	126	807	149	0.22	(128, 808, 156)	0.72	0.54	0.41	254	1	1	fca-3	epidermis	exp1	7			1.2161
0.47	20792	136	865	153	0.22	(133, 866, 156)	0.4	0.44	0.39	305	1	1	fca-3	epidermis	exp1	7			0.585641
0.47	16821	139	882	155	0.23	(134, 883, 156)	0.36	0.46	0.37	341	1	1	fca-3	epidermis	exp1	7			0.512973
0.5	17344	131	848	155	0.23	(126, 848, 156)	0.42	0.47	0.4	416	1	1	fca-3	epidermis	exp1	7			0.58
0.42	203785	117	357	69	0.25	(134, 324, 57)	0.47	0.42	0.96	38	2	1	fca-3	epidermis	exp1	7			0.0695833
0.35	211284	120	254	66	0.28	(130, 264, 74)	0.44	0.34	0.97	41	2	1	fca-3	epidermis	exp1	7			0.113608
0.32	228103	133	133	66	0.28	(145, 149, 71)	0.41	0.32	0.94	57	2	1	fca-3	epidermis	exp1	7			0.11617
0.6	159772	122	452	73	0.3	(131, 453, 78)	1.21	0.56	1	58	2	1	fca-3	epidermis	exp1	7			0.65
0.47	151017	137	597	83	0.3	(132, 577, 69)	0.51	0.47	1	61	2	1	fca-3	epidermis	exp1	7			0.04
0.5	136063	130	527	76	0.3	(137, 529, 81)	0.62	0.49	1	69	2	1	fca-3	epidermis	exp1	7			0.13
0.62	108252	146	738	105	0.27	(154, 743, 108)	1.09	0.57	0.99	88	2	1	fca-3	epidermis	exp1	7			0.53101
0.54	95962	158	843	119	0.27	(159, 841, 118)	0.67	0.52	1	98	2	1	fca-3	epidermis	exp1	7			0.15
0.5	86584	140	653	93	0.32	(148, 652, 92)	0.66	0.48	1	117	2	1	fca-3	epidermis	exp1	7			0.18
0.68	93671	153	788	112	0.27	(158, 790, 116)	1.46	0.59	0.95	157	2	1	fca-3	epidermis	exp1	7			0.946842
0.53	55965	167	912	130	0.27	(171, 916, 132)	0.72	0.49	0.99	176	2	1	fca-3	epidermis	exp1	7			0.237273
0.56	48335	164	883	126	0.26	(165, 882, 125)	0.67	0.52	0.94	185	2	1	fca-3	epidermis	exp1	7			0.192766
0.49	61394	142	689	97	0.29	(146, 693, 98)	0.54	0.48	0.95	204	2	1	fca-3	epidermis	exp1	7			0.0884211
0.37	367520	184	116	39	0.22	(188, 120, 21)	0.44	0.37	1	8	3	1	fca-3	epidermis	exp1	7			0.07
0.47	322478	169	253	40	0.2	(174, 260, 40)	0.92	0.45	1	17	3	1	fca-3	epidermis	exp1	7			0.47
0.57	142547	168	352	40	0.2	(172, 359, 46)	1.18	0.53	1	64	3	1	fca-3	epidermis	exp1	7			0.65
0.52	133763	167	409	45	0.21	(171, 413, 48)	0.77	0.51	1	70	3	1	fca-3	epidermis	exp1	7			0.26
0.81	117977	187	572	61	0.23	(187, 577, 65)	1.82	0.72	1	77	3	1	fca-3	epidermis	exp1	7			1.1
0.65	111460	170	463	49	0.25	(175, 467, 52)	1.04	0.61	1	81	3	1	fca-3	epidermis	exp1	7			0.43
0.6	110661	193	679	77	0.27	(195, 684, 81)	0.96	0.57	1	83	3	1	fca-3	epidermis	exp1	7			0.39
0.48	102289	176	515	56	0.26	(180, 525, 44)	0.54	0.47	1	92	3	1	fca-3	epidermis	exp1	7			0.07
0.56	100294	197	726	82	0.27	(197, 727, 87)	0.77	0.54	1	93	3	1	fca-3	epidermis	exp1	7			0.23
0.58	95980	203	770	92	0.27	(202, 772, 96)	0.87	0.55	1	97	3	1	fca-3	epidermis	exp1	7			0.32
0.56	102082	190	628	68	0.24	(193, 628, 68)	0.79	0.53	0.96	127	3	1	fca-3	epidermis	exp1	7			0.292917
0.66	68595	217	918	112	0.27	(219, 918, 111)	1.1	0.59	1	151	3	1	fca-3	epidermis	exp1	7			0.51
0.54	58608	221	946	119	0.27	(223, 947, 123)	0.74	0.5	0.98	164	3	1	fca-3	epidermis	exp1	7			0.255102
0.53	48516	211	818	96	0.29	(213, 819, 97)	0.58	0.49	0.82	194	3	1	fca-3	epidermis	exp1	7			0.217317
0.57	44815	203	800	94	0.29	(206, 800, 95)	0.61	0.53	0.8	200	3	1	fca-3	epidermis	exp1	7			0.2325
0.61	44456	206	839	100	0.31	(206, 840, 101)	0.76	0.54	0.82	201	3	1	fca-3	epidermis	exp1	7			0.386829
0.82	43218	213	893	111	0.28	(214, 893, 115)	1.21	0.68	0.84	202	3	1	fca-3	epidermis	exp1	7			0.760476
0.59	43084	213	857	102	0.27	(215, 857, 100)	0.67	0.53	0.8	203	3	1	fca-3	epidermis	exp1	7			0.3075
0.48	38977	224	970	122	0.26	(222, 970, 124)	0.43	0.46	0.78	218	3	1	fca-3	epidermis	exp1	7			0.0912821
0.72	38356	210	875	104	0.29	(211, 876, 106)	0.82	0.62	0.69	224	3	1	fca-3	epidermis	exp1	7			0.568406
0.7	30416	228	1003	129	0.26	(228, 1003, 134)	0.71	0.61	0.56	251	3	1	fca-3	epidermis	exp1	7			0.657857
0.46	34975	227	987	127	0.3	(226, 988, 117)	0.37	0.45	0.68	259	3	1	fca-3	epidermis	exp1	7			0.0941176
0.71	23676	229	1017	134	0.3	(242, 1008, 148)	0.17		0	286	3	1	fca-3	epidermis	exp1	7			#DIV/0!
0.29	146429	233	59	14	0.12	(238, 21, 27)	0.31	0.28	0.91	106	4	1	fca-3	epidermis	exp1	7			0.0606593
0.47	131897	209	405	18	0.14	(211, 409, 26)	0.67	0.45	0.98	108	4	1	fca-3	epidermis	exp1	7			0.233673
0.52	122481	212	490	27	0.16	(212, 496, 31)	0.77	0.5	1	109	4	1	fca-3	epidermis	exp1	7			0.27
0.34	135598	218	187	14	0.12	(216, 196, 24)	0.4	0.33	0.94	113	4	1	fca-3	epidermis	exp1	7			0.0955319
0.71	80012	260	876	94	0.29	(261, 877, 96)	1.38	0.62	1	122	4	1	fca-3	epidermis	exp1	7			0.76
0.4	137122	213	297	15	0.16	(211, 301, 22)	0.48	0.39	0.93	124	4	1	fca-3	epidermis	exp1	7			0.126129
0.48	72900	237	601	48	0.21	(241, 598, 38)	0.5	0.48	1	139	4	1	fca-3	epidermis	exp1	7			0.02
0.63	71079	239	652	56	0.26	(240, 655, 63)	1.02	0.57	1	144	4	1	fca-3	epidermis	exp1	7			0.45
0.59	69297	256	830	82	0.27	(256, 835, 86)	0.77	0.56	1	147	4	1	fca-3	epidermis	exp1	7			0.21
0.54	68552	248	747	72	0.26	(256, 747, 65)	0.58	0.53	1	152	4	1	fca-3	epidermis	exp1	7			0.05
0.62	62878	254	787	76	0.3	(253, 789, 79)	0.89	0.57	1	160	4	1	fca-3	epidermis	exp1	7			0.32
0.55	77981	245	699	63	0.25	(252, 703, 62)	0.6	0.54	0.97	166	4	1	fca-3	epidermis	exp1	7			0.0785567
0.52	48241	265	921	99	0.28	(262, 923, 93)	0.56	0.51	0.99	186	4	1	fca-3	epidermis	exp1	7			0.0556566
0.56	70896	235	551	38	0.19	(237, 557, 46)	0.75	0.53	0.97	187	4	1	fca-3	epidermis	exp1	7			0.243196
0.47	42247	269	953	109	0.27	(262, 956, 105)	0.48	0.47	0.99	209	4	1	fca-3	epidermis	exp1	7			0.0148485
0.42	37780	272	986	116	0.28	(279, 981, 108)	0.39	0.42	0.96	225	4	1	fca-3	epidermis	exp1	7			-0.01375
0.43	199160	257	324	17	0.13	(253, 334, 23)	0.92	0.41	0.98	79	5	1	fca-3	epidermis	exp1	7			0.528776
0.52	157181	254	454	26	0.17	(252, 459, 33)	0.87	0.5	0.97	82	5	1	fca-3	epidermis	exp1	7			0.396907
0.31	223907	268	148	16	0.14	(255, 165, 20)	0.4	0.31	0.97	101	5	1	fca-3	epidermis	exp1	7			0.102371
0.35	233189	312	59	45	0.21	(312, 105, 59)	0.41	0.35	0.92	29	6	1	fca-3	epidermis	exp1	7			0.0956522
0.54	140851	288	614	67	0.25	(293, 609, 68)	0.62	0.53	1	66	6	1	fca-3	epidermis	exp1	7			0.09
0.52	151360	286	510	51	0.21	(290, 489, 44)	0.58	0.52	0.94	68	6	1	fca-3	epidermis	exp1	7			0.0970213
0.66	132751	283	563	61	0.23	(284, 565, 63)	1.12	0.62	1	71	6	1	fca-3	epidermis	exp1	7			0.5
0.35	218179	302	176	41	0.19	(303, 175, 25)	0.43	0.35	0.95	74	6	1	fca-3	epidermis	exp1	7			0.102632
0.47	109987	291	659	74	0.26	(310, 668, 83)	0.51	0.47	0.99	84	6	1	fca-3	epidermis	exp1	7			0.0451515
0.46	108745	295	701	85	0.27	(287, 703, 68)	0.51	0.46	1	86	6	1	fca-3	epidermis	exp1	7			0.05
0.42	197520	295	298	42	0.2	(302, 334, 40)	0.47	0.42	0.98	94	6	1	fca-3	epidermis	exp1	7			0.0595918
0.61	98148	295	738	88	0.27	(295, 740, 97)	0.82	0.59	1	96	6	1	fca-3	epidermis	exp1	7			0.23
0.47	167155	291	416	47	0.2	(300, 448, 44)	0.55	0.47	1	99	6	1	fca-3	epidermis	exp1	7			0.08
0.49	94633	301	777	96	0.29	(299, 775, 79)	0.58	0.48	1	107	6	1	fca-3	epidermis	exp1	7			0.1
0.84	72762	316	959	127	0.3	(315, 960, 130)	1.72	0.71	1	140	6	1	fca-3	epidermis	exp1	7			1.01
0.62	71852	313	928	121	0.28	(312, 929, 122)	1.02	0.56	1	141	6	1	fca-3	epidermis	exp1	7			0.46
0.39	57492	312	901	114	0.28	(332, 899, 116)	0.38	0.38	0.87	167	6	1	fca-3	epidermis	exp1	7			0.0567816
0.39	48823	308	881	113	0.28	(320, 883, 102)	0.34	0.38	0.78	183	6	1	fca-3	epidermis	exp1	7			0.0558974
0.39	46447	316	1006	138	0.26	(307, 1008, 133)	0.35	0.38	0.43	192	6	1	fca-3	epidermis	exp1	7			0.433953
0.35	45702	318	986	132	0.25	(339, 983, 132)	0.31	0.34	0.81	195	6	1	fca-3	epidermis	exp1	7			0.042716
0.39	45944	308	862	109	0.27	(304, 862, 90)	0.35	0.38	0.79	197	6	1	fca-3	epidermis	exp1	7			0.063038
0.49	48534	303	806	98	0.27	(301, 805, 83)	0.44	0.48	0.8	230	6	1	fca-3	epidermis	exp1	7			0.07
0.4	51994	307	843	106	0.29	(297, 842, 87)	0.36	0.4	0.81	236	6	1	fca-3	epidermis	exp1	7			0.0444444
0.49	39603	300	824	102	0.27	(284, 825, 109)	0.42	0.49	0.8	300	6	1	fca-3	epidermis	exp1	7			0.035
0.35	297273	375	67	123	0.28	(371, 74, 120)	0.88	0.34	1	15	7	1	fca-3	epidermis	exp1	7			0.54
0.38	282933	360	336	119	0.27	(366, 331, 105)	0.47	0.38	1	19	7	1	fca-3	epidermis	exp1	7			0.09
0.52	231032	356	430	124	0.27	(355, 431, 117)	1.09	0.5	1	30	7	1	fca-3	epidermis	exp1	7			0.59
0.41	221656	364	243	117	0.32	(361, 249, 124)	0.84	0.39	0.96	39	7	1	fca-3	epidermis	exp1	7			0.485
0.43	238846	369	164	120	0.29	(363, 167, 109)	1.2	0.4	1	40	7	1	fca-3	epidermis	exp1	7			0.8
0.46	108332	358	499	127	0.3	(357, 499, 127)	0.75	0.44	1	87	7	1	fca-3	epidermis	exp1	7			0.31
0.37	105231	358	542	132	0.25	(373, 539, 128)	0.44	0.36	0.99	90	7	1	fca-3	epidermis	exp1	7			0.0844444
0.5	103661	362	584	136	0.25	(360, 586, 139)	0.77	0.47	1	91	7	1	fca-3	epidermis	exp1	7			0.3
0.45	91062	363	622	144	0.28	(361, 622, 146)	0.62	0.44	1	114	7	1	fca-3	epidermis	exp1	7			0.18
0.35	78965	365	660	145	0.23	(358, 659, 129)	0.39	0.35	0.99	126	7	1	fca-3	epidermis	exp1	7			0.0439394
0.41	55518	367	695	150	0.24	(365, 695, 151)	0.5	0.4	0.87	170	7	1	fca-3	epidermis	exp1	7			0.174713
0.42	46708	368	753	148	0.24	(371, 755, 145)	0.47	0.42	1	191	7	1	fca-3	epidermis	exp1	7			0.05
0.37	42508	368	726	152	0.22	(374, 725, 146)	0.4	0.4	0.98	207	7	1	fca-3	epidermis	exp1	7			0.00816327
0.52	34171	370	783	154	0.28	(373, 785, 156)	0.65	0.45	0.52	240	7	1	fca-3	epidermis	exp1	7			0.8
0.64	24473	374	812	156	0.22	(375, 813, 156)	0.84	0.53	0.53	279	7	1	fca-3	epidermis	exp1	7			1.05491
0.47	18828	376	841	158	0.22	(376, 841, 156)	0.46	0.45	0.47	317	7	1	fca-3	epidermis	exp1	7			0.528723
0.35	290021	347	177	62	0.25	(332, 190, 67)	0.57	0.34	0.97	22	8	1	fca-3	epidermis	exp1	7			0.247629
0.32	209222	360	53	64	0.24	(351, 29, 75)	0.82	0.3	0.93	37	8	1	fca-3	epidermis	exp1	7			0.58172
0.52	190135	338	474	70	0.26	(332, 479, 75)	1.04	0.49	0.98	46	8	1	fca-3	epidermis	exp1	7			0.571224
0.36	187108	341	299	60	0.24	(325, 314, 64)	0.42	0.36	0.99	47	8	1	fca-3	epidermis	exp1	7			0.0642424
0.4	184738	335	387	62	0.25	(346, 420, 74)	0.42	0.4	0.97	49	8	1	fca-3	epidermis	exp1	7			0.0329897
0.53	127784	342	635	92	0.27	(335, 641, 94)	0.77	0.52	1	72	8	1	fca-3	epidermis	exp1	7			0.25
0.48	162938	338	559	82	0.27	(338, 585, 70)	0.53	0.47	0.99	103	8	1	fca-3	epidermis	exp1	7			0.0653535
0.48	80013	348	723	111	0.28	(344, 726, 95)	0.52	0.48	1	121	8	1	fca-3	epidermis	exp1	7			0.04
0.58	75229	356	874	135	0.25	(354, 871, 136)	0.79	0.55	1	135	8	1	fca-3	epidermis	exp1	7			0.24
0.46	66286	345	687	104	0.29	(337, 688, 87)	0.53	0.45	0.98	156	8	1	fca-3	epidermis	exp1	7			0.0908163
0.61	64006	353	832	126	0.26	(355, 837, 131)	0.85	0.57	1	159	8	1	fca-3	epidermis	exp1	7			0.28
0.44	61394	353	795	119	0.27	(365, 794, 124)	0.45	0.44	1	161	8	1	fca-3	epidermis	exp1	7			0.01
0.44	53716	348	761	112	0.27	(362, 760, 117)	0.45	0.44	0.99	172	8	1	fca-3	epidermis	exp1	7			0.0145455
0.33	372561	156	215	103	0.29	(163, 211, 101)	1.36	0.31	1	7	9	1	fca-3	cortex	exp1	7			1.05
0.28	421381	172	90	103	0.29	(168, 96, 91)	1.34	0.25	0.94	18	9	1	fca-3	cortex	exp1	7			1.17553
0.4	278256	150	399	107	0.29	(148, 401, 106)	1.22	0.37	1	21	9	1	fca-3	cortex	exp1	7			0.85
0.48	258850	155	489	115	0.27	(158, 487, 110)	1.53	0.44	1	24	9	1	fca-3	cortex	exp1	7			1.09
0.51	221625	159	567	122	0.26	(155, 570, 118)	1.67	0.47	1	32	9	1	fca-3	cortex	exp1	7			1.2
0.39	252047	155	314	101	0.28	(151, 311, 104)	1.38	0.35	0.93	56	9	1	fca-3	cortex	exp1	7			1.13387
0.47	94758	165	645	130	0.27	(165, 645, 132)	1.01	0.42	1	104	9	1	fca-3	cortex	exp1	7			0.59
0.56	77849	176	739	138	0.26	(172, 739, 143)	1.09	0.49	0.99	129	9	1	fca-3	cortex	exp1	7			0.61101
0.49	76726	169	707	138	0.26	(171, 709, 140)	0.9	0.45	1	132	9	1	fca-3	cortex	exp1	7			0.45
0.41	70457	167	616	126	0.26	(168, 618, 128)	0.7	0.38	0.95	146	9	1	fca-3	cortex	exp1	7			0.356842
0.38	68170	170	678	134	0.3	(178, 679, 133)	0.52	0.37	0.98	153	9	1	fca-3	cortex	exp1	7			0.160612
0.46	53310	178	765	142	0.24	(177, 766, 147)	0.6	0.42	0.94	175	9	1	fca-3	cortex	exp1	7			0.218298
0.54	45122	188	835	148	0.24	(188, 836, 156)	0.79	0.47	0.5	198	9	1	fca-3	cortex	exp1	7			1.11
0.45	42652	185	813	143	0.24	(179, 813, 143)	0.44	0.43	0.83	206	9	1	fca-3	cortex	exp1	7			0.10012
0.43	42505	183	791	145	0.23	(178, 792, 145)	0.45	0.42	0.92	208	9	1	fca-3	cortex	exp1	7			0.0691304
0.61	40545	192	860	149	0.22	(187, 861, 156)	0.97	0.49	0.49	212	9	1	fca-3	cortex	exp1	7			1.48959
0.59	30373	197	908	153	0.22	(194, 909, 156)	0.75	0.5	0.47	252	9	1	fca-3	cortex	exp1	7			1.09574
0.69	29861	195	884	153	0.22	(189, 886, 156)	0.99	0.52	0.49	253	9	1	fca-3	cortex	exp1	7			1.50041
0.4	28622	205	933	155	0.23	(204, 934, 156)	0.4	0.4	0.5	262	9	1	fca-3	cortex	exp1	7			0.4
0.41	17411	215	960	158	0.22	(219, 960, 156)	0.37	0.41	0.46	335	9	1	fca-3	cortex	exp1	7			0.394348
0.31	321459	248	74	65	0.24	(231, 90, 79)	1.2	0.28	0.95	11	10	1	fca-3	cortex	exp1	7			0.983158
0.37	320914	234	240	67	0.25	(236, 250, 60)	1.36	0.34	1	12	10	1	fca-3	cortex	exp1	7			1.02
0.34	309670	242	157	68	0.24	(248, 153, 51)	1.36	0.31	1	14	10	1	fca-3	cortex	exp1	7			1.05
0.43	225893	232	312	66	0.28	(228, 308, 56)	1.51	0.38	1	31	10	1	fca-3	cortex	exp1	7			1.13
0.36	208480	227	371	68	0.24	(227, 370, 64)	0.79	0.34	1	34	10	1	fca-3	cortex	exp1	7			0.45
0.46	208006	228	433	73	0.3	(229, 434, 71)	1.4	0.41	1	35	10	1	fca-3	cortex	exp1	7			0.99
0.39	188092	231	490	77	0.27	(232, 492, 76)	0.7	0.38	1	45	10	1	fca-3	cortex	exp1	7			0.32
0.67	105569	234	539	83	0.3	(236, 545, 88)	1.78	0.55	0.99	52	10	1	fca-3	cortex	exp1	7			1.24798
0.59	113575	239	617	100	0.31	(243, 618, 102)	1.54	0.5	1	80	10	1	fca-3	cortex	exp1	7			1.04
0.57	95283	245	654	105	0.27	(245, 653, 106)	1.26	0.5	1	111	10	1	fca-3	cortex	exp1	7			0.76
0.68	90818	247	724	117	0.32	(249, 727, 120)	1.63	0.57	0.99	118	10	1	fca-3	cortex	exp1	7			1.07646
0.41	93750	253	760	122	0.26	(264, 754, 108)	0.45	0.41	0.94	123	10	1	fca-3	cortex	exp1	7			0.0687234
0.62	83182	256	832	130	0.27	(253, 832, 123)	0.69	0.61	1	128	10	1	fca-3	cortex	exp1	7			0.08
0.57	75258	260	866	138	0.26	(262, 868, 136)	1.07	0.5	1	134	10	1	fca-3	cortex	exp1	7			0.57
0.54	73697	246	692	109	0.27	(249, 690, 114)	0.93	0.49	0.99	145	10	1	fca-3	cortex	exp1	7			0.449394
0.59	89574	234	577	94	0.29	(235, 578, 95)	1.33	0.5	0.98	168	10	1	fca-3	cortex	exp1	7			0.857143
0.58	82859	255	796	125	0.26	(253, 796, 123)	1.09	0.51	0.98	171	10	1	fca-3	cortex	exp1	7			0.602245
0.3	467154	316	111	101	0.28	(319, 110, 86)	1.22	0.28	1	5	11	1	fca-3	cortex	exp1	7			0.94
0.33	243719	308	231	99	0.28	(304, 231, 94)	1.06	0.29	1	26	11	1	fca-3	cortex	exp1	7			0.77
0.27	174678	307	300	99	0.28	(304, 297, 81)	0.39	0.26	0.99	53	11	1	fca-3	cortex	exp1	7			0.133939
0.42	127036	303	469	103	0.29	(309, 470, 103)	0.7	0.39	1	73	11	1	fca-3	cortex	exp1	7			0.31
0.49	118271	302	520	108	0.27	(305, 523, 110)	1.06	0.43	1	76	11	1	fca-3	cortex	exp1	7			0.63
0.5	95406	308	602	124	0.27	(304, 604, 121)	1.11	0.45	1	100	11	1	fca-3	cortex	exp1	7			0.66
0.55	80498	315	679	136	0.25	(312, 682, 135)	1.16	0.49	1	120	11	1	fca-3	cortex	exp1	7			0.67
0.53	79186	311	641	131	0.27	(311, 642, 134)	0.97	0.48	1	125	11	1	fca-3	cortex	exp1	7			0.49
0.58	74298	305	566	117	0.32	(302, 567, 119)	1.19	0.49	1	138	11	1	fca-3	cortex	exp1	7			0.7
0.57	71558	320	758	143	0.24	(319, 759, 148)	1.09	0.49	0.98	143	11	1	fca-3	cortex	exp1	7			0.622245
0.51	69240	314	720	141	0.25	(313, 718, 144)	0.87	0.46	1	148	11	1	fca-3	cortex	exp1	7			0.41
0.47	61964	320	798	146	0.23	(319, 801, 153)	0.68	0.44	0.75	181	11	1	fca-3	cortex	exp1	7			0.466667
0.45	47558	321	831	150	0.24	(326, 832, 156)	0.6	0.42	0.54	205	11	1	fca-3	cortex	exp1	7			0.691111
0.52	25199	322	891	157	0.23	(329, 892, 156)	0.61	0.41	0.46	276	11	1	fca-3	cortex	exp1	7			0.916087
0.4	32209	321	864	154	0.28	(317, 864, 153)	0.43	0.4	0.72	304	11	1	fca-3	cortex	exp1	7			0.197222
0.33	155044	302	361	101	0.28	(308, 364, 94)	0.58	0.31	1	8592	11	1	fca-3	cortex	exp1	7			0.27
0.42	139325	300	414	101	0.28	(299, 417, 98)	1.02	0.37	1	8593	11	1	fca-3	cortex	exp1	7			0.65
0.43	262311	150	161	26	0.23	(159, 164, 33)	1.16	0.4	0.9	19	1	2	fca-3	epidermis	exp1	7			0.888889
0.45	218719	151	299	35	0.25	(157, 303, 49)	1.26	0.41	0.94	28	1	2	fca-3	epidermis	exp1	7			0.930426
0.61	160023	145	407	45	0.28	(154, 412, 52)	1.52	0.56	1	44	1	2	fca-3	epidermis	exp1	7			0.96
0.77	139174	145	479	51	0.29	(148, 487, 60)	1.91	0.68	1	49	1	2	fca-3	epidermis	exp1	7			1.23
0.76	104670	137	545	58	0.31	(141, 547, 65)	1.35	0.7	0.99	62	1	2	fca-3	epidermis	exp1	7			0.663636
0.86	84633	138	702	81	0.31	(141, 704, 82)	1.56	0.77	1	76	1	2	fca-3	epidermis	exp1	7			0.79
0.95	78993	137	652	71	0.32	(143, 655, 74)	1.82	0.83	0.99	81	1	2	fca-3	epidermis	exp1	7			1.00838
0.88	68790	139	601	64	0.32	(141, 605, 70)	1.73	0.74	0.99	97	1	2	fca-3	epidermis	exp1	7			1.00747
0.68	39968	137	763	94	0.32	(137, 764, 93)	0.74	0.65	0.9	145	1	2	fca-3	epidermis	exp1	7			0.172222
0.7	38566	134	740	88	0.31	(131, 741, 86)	0.78	0.66	0.95	151	1	2	fca-3	epidermis	exp1	7			0.161053
0.82	47063	129	813	108	0.31	(138, 814, 102)	1.05	0.76	0.97	187	1	2	fca-3	epidermis	exp1	7			0.322474
0.91	31639	136	787	96	0.32	(138, 788, 97)	1.11	0.8	0.84	202	1	2	fca-3	epidermis	exp1	7			0.521429
0.56	238413	200	190	17	0.19	(200, 185, 20)	2.02	0.5	1	22	2	2	fca-3	epidermis	exp1	7			1.52
0.52	219827	197	341	26	0.23	(199, 340, 25)	0.88	0.51	1	27	2	2	fca-3	epidermis	exp1	7			0.37
0.74	173690	194	446	31	0.23	(194, 444, 36)	1.79	0.67	1	39	2	2	fca-3	epidermis	exp1	7			1.12
0.79	150260	189	534	40	0.26	(186, 538, 46)	1.67	0.73	1	46	2	2	fca-3	epidermis	exp1	7			0.94
0.83	131056	188	603	49	0.31	(192, 604, 49)	1.65	0.76	1	50	2	2	fca-3	epidermis	exp1	7			0.89
0.99	103271	188	660	57	0.31	(189, 661, 59)	2.13	0.87	1	64	2	2	fca-3	epidermis	exp1	7			1.26
0.85	58697	187	700	64	0.32	(186, 701, 67)	1.31	0.76	0.98	108	2	2	fca-3	epidermis	exp1	7			0.576735
0.87	53158	184	726	69	0.33	(186, 728, 66)	1.34	0.76	0.98	116	2	2	fca-3	epidermis	exp1	7			0.607347
1.03	51158	183	756	73	0.35	(183, 756, 73)	1.62	0.89	0.99	118	2	2	fca-3	epidermis	exp1	7			0.746364
0.87	49351	178	864	93	0.32	(179, 866, 95)	1.22	0.78	1	124	2	2	fca-3	epidermis	exp1	7			0.44
1.04	49212	184	784	76	0.32	(184, 785, 80)	1.63	0.89	0.99	125	2	2	fca-3	epidermis	exp1	7			0.756465
1.28	47423	180	836	89	0.32	(182, 838, 86)	2.07	1.06	0.91	128	2	2	fca-3	epidermis	exp1	7			1.21473
1.55	43621	182	813	84	0.32	(182, 813, 85)	2.69	1.21	0.95	136	2	2	fca-3	epidermis	exp1	7			1.62158
0.89	40828	173	892	98	0.31	(175, 893, 99)	1.18	0.8	0.97	143	2	2	fca-3	epidermis	exp1	7			0.416495
1.05	39233	175	941	106	0.32	(174, 943, 107)	1.43	0.91	0.98	148	2	2	fca-3	epidermis	exp1	7			0.549184
1.35	38664	172	917	105	0.31	(173, 917, 107)	2.03	1.08	0.9	150	2	2	fca-3	epidermis	exp1	7			1.17556
0.55	104100	241	478	16	0.2	(245, 481, 24)	0.79	0.53	0.98	68	3	2	fca-3	epidermis	exp1	7			0.276122
0.8	98523	237	542	24	0.21	(236, 548, 27)	1.78	0.69	1	73	3	2	fca-3	epidermis	exp1	7			1.09
1.19	87139	234	681	44	0.27	(236, 683, 47)	2.87	0.98	1	75	3	2	fca-3	epidermis	exp1	7			1.89
0.81	132498	236	612	33	0.25	(236, 618, 38)	1.63	0.75	0.95	84	3	2	fca-3	epidermis	exp1	7			0.965789
0.48	83471	245	325	12	0.21	(248, 331, 18)	0.79	0.44	0.93	109	3	2	fca-3	epidermis	exp1	7			0.409462
0.78	50682	231	731	53	0.3	(233, 730, 54)	0.92	0.75	1	119	3	2	fca-3	epidermis	exp1	7			0.17
0.49	83476	243	401	13	0.18	(245, 403, 19)	0.9	0.44	0.94	121	3	2	fca-3	epidermis	exp1	7			0.517447
1.25	49630	221	871	87	0.32	(221, 871, 88)	2.31	0.99	1	122	3	2	fca-3	epidermis	exp1	7			1.32
0.94	41937	232	764	59	0.32	(233, 766, 60)	1.33	0.83	1	140	3	2	fca-3	epidermis	exp1	7			0.5
1.42	39749	228	797	64	0.32	(229, 799, 68)	2.35	1.12	1	147	3	2	fca-3	epidermis	exp1	7			1.23
1.03	38437	226	829	72	0.32	(229, 830, 72)	1.48	0.88	1	152	3	2	fca-3	epidermis	exp1	7			0.6
0.79	46354	215	918	99	0.31	(216, 927, 102)	0.91	0.76	0.99	185	3	2	fca-3	epidermis	exp1	7			0.159192
0.39	278364	291	250	20	0.2	(302, 204, 36)	0.8	0.38	0.84	21	4	2	fca-3	epidermis	exp1	7			0.572381
0.47	254123	289	366	27	0.22	(288, 370, 33)	0.61	0.46	1	23	4	2	fca-3	epidermis	exp1	7			0.15
0.71	186485	285	453	31	0.23	(281, 450, 34)	1.31	0.68	1	33	4	2	fca-3	epidermis	exp1	7			0.63
0.83	180850	285	531	36	0.25	(282, 540, 50)	2.47	0.74	1	37	4	2	fca-3	epidermis	exp1	7			1.73
0.92	139263	283	597	46	0.31	(282, 599, 52)	2.18	0.83	1	48	4	2	fca-3	epidermis	exp1	7			1.35
0.86	84157	277	718	67	0.33	(274, 719, 69)	1.41	0.79	1	77	4	2	fca-3	epidermis	exp1	7			0.62
1.17	75431	282	646	53	0.3	(283, 648, 56)	2.44	0.98	1	86	4	2	fca-3	epidermis	exp1	7			1.46
0.88	70526	265	828	87	0.32	(267, 825, 76)	0.97	0.86	0.99	91	4	2	fca-3	epidermis	exp1	7			0.119798
0.89	70476	279	680	61	0.31	(274, 679, 66)	1.42	0.8	1	92	4	2	fca-3	epidermis	exp1	7			0.62
0.87	67825	272	753	71	0.32	(272, 754, 72)	1.43	0.77	1	98	4	2	fca-3	epidermis	exp1	7			0.66
1.58	61192	263	863	97	0.34	(262, 865, 99)	3.39	1.24	0.98	104	4	2	fca-3	epidermis	exp1	7			2.21918
1.33	56395	258	890	104	0.32	(255, 891, 104)	2.53	1.11	0.98	112	4	2	fca-3	epidermis	exp1	7			1.47163
0.74	70421	270	791	77	0.33	(270, 785, 74)	0.81	0.73	0.94	155	4	2	fca-3	epidermis	exp1	7			0.131702
0.9	29969	249	921	111	0.32	(250, 922, 109)	1.07	0.79	0.98	170	4	2	fca-3	epidermis	exp1	7			0.301837
1.41	27251	245	947	116	0.3	(248, 948, 119)	2.07	1.05	0.53	178	4	2	fca-3	epidermis	exp1	7			2.85566
0.49	259408	331	343	48	0.28	(324, 353, 56)	1.55	0.45	0.92	52	5	2	fca-3	epidermis	exp1	7			1.23478
0.68	167384	323	492	61	0.31	(318, 502, 63)	1.92	0.6	0.98	87	5	2	fca-3	epidermis	exp1	7			1.35918
0.88	113632	319	604	75	0.32	(316, 604, 81)	2.21	0.76	1	4732	5	2	fca-3	epidermis	exp1	7			1.45
0.71	39882	316	669	85	0.31	(311, 671, 86)	0.89	0.65	0.99	4734	5	2	fca-3	epidermis	exp1	7			0.24899
0.84	35938	312	703	89	0.32	(315, 702, 86)	1.19	0.71	1	156	5	2	fca-3	epidermis	exp1	7			0.48
0.36	194606	334	438	104	0.32	(342, 438, 84)	0.43	0.37	0.98	4	6	2	fca-3	epidermis	exp1	7			0.0687755
0.33	263559	343	206	79	0.33	(356, 220, 81)	0.41	0.33	0.89	45	6	2	fca-3	epidermis	exp1	7			0.130674
0.47	116398	332	504	104	0.32	(327, 505, 91)	0.64	0.47	0.98	56	6	2	fca-3	epidermis	exp1	7			0.183061
0.48	113433	333	561	106	0.32	(330, 568, 89)	0.58	0.48	0.99	57	6	2	fca-3	epidermis	exp1	7			0.105859
0.55	79214	329	612	111	0.32	(318, 606, 100)	0.82	0.52	0.9	4733	6	2	fca-3	epidermis	exp1	7			0.391111
0.81	52585	329	656	112	0.3	(328, 660, 119)	1.38	0.7	0.54	4735	6	2	fca-3	epidermis	exp1	7			1.85556
0.41	185117	341	345	91	0.32	(334, 352, 76)	0.68	0.39	0.89	4737	6	2	fca-3	epidermis	exp1	7			0.374045
0.67	39084	323	692	116	0.3	(323, 692, 119)	0.9	0.62	0.54	149	6	2	fca-3	epidermis	exp1	7			1.04667
0.38	236062	172	306	74	0.32	(157, 308, 72)	1.6	0.33	0.96	10	7	2	fca-3	cortex	exp1	7			1.33667
0.52	181975	166	390	81	0.31	(170, 377, 69)	1.93	0.44	1	36	7	2	fca-3	cortex	exp1	7			1.49
0.48	160292	159	462	90	0.34	(165, 455, 91)	1.29	0.44	0.99	43	7	2	fca-3	cortex	exp1	7			0.86303
0.64	101803	158	573	95	0.31	(161, 574, 97)	1.39	0.58	1	65	7	2	fca-3	cortex	exp1	7			0.81
0.59	100529	156	620	100	0.35	(159, 620, 101)	0.93	0.56	0.99	66	7	2	fca-3	cortex	exp1	7			0.379394
0.77	67989	162	656	107	0.34	(160, 657, 110)	1.26	0.72	0.94	107	7	2	fca-3	cortex	exp1	7			0.620426
0.56	125809	158	521	87	0.32	(158, 526, 95)	1.18	0.51	0.99	4739	7	2	fca-3	cortex	exp1	7			0.681919
0.7	49244	160	734	113	0.32	(158, 737, 119)	1.13	0.64	0.53	138	7	2	fca-3	cortex	exp1	7			1.49208
0.69	43008	166	766	117	0.34	(157, 768, 119)	0.95	0.64	0.5	144	7	2	fca-3	cortex	exp1	7			1.26
0.7	51543	162	704	113	0.32	(156, 706, 113)	1.06	0.62	0.9	153	7	2	fca-3	cortex	exp1	7			0.557778
0.81	32207	161	797	117	0.34	(159, 798, 119)	1.05	0.75	0.53	164	7	2	fca-3	cortex	exp1	7			1.23113
0.69	44889	163	679	109	0.31	(156, 680, 110)	0.91	0.59	0.84	191	7	2	fca-3	cortex	exp1	7			0.493333
0.44	435026	239	238	44	0.27	(244, 263, 30)	2.89	0.38	0.93	11	8	2	fca-3	cortex	exp1	7			2.72753
0.42	233233	233	405	53	0.3	(226, 405, 51)	1.16	0.39	1	24	8	2	fca-3	cortex	exp1	7			0.77
0.67	93027	227	641	78	0.31	(224, 643, 82)	1.24	0.6	1	61	8	2	fca-3	cortex	exp1	7			0.64
0.76	74987	228	546	65	0.32	(234, 552, 61)	1.96	0.58	0.99	88	8	2	fca-3	cortex	exp1	7			1.3998
1.01	68308	219	780	101	0.32	(217, 778, 97)	1.98	0.88	1	102	8	2	fca-3	cortex	exp1	7			1.1
0.7	46716	215	841	111	0.32	(214, 841, 108)	0.89	0.65	1	130	8	2	fca-3	cortex	exp1	7			0.24
0.93	52103	228	683	80	0.35	(231, 686, 71)	1.25	0.85	0.93	132	8	2	fca-3	cortex	exp1	7			0.494086
0.88	49724	227	714	86	0.32	(223, 712, 86)	1.51	0.73	0.99	134	8	2	fca-3	cortex	exp1	7			0.795253
0.63	150310	231	500	68	0.32	(225, 502, 60)	2.09	0.53	0.99	4742	8	2	fca-3	cortex	exp1	7			1.58111
0.92	42059	214	809	103	0.32	(218, 810, 102)	1.31	0.8	0.99	139	8	2	fca-3	cortex	exp1	7			0.523232
0.67	100810	227	596	77	0.33	(229, 594, 69)	1.53	0.58	1	4743	8	2	fca-3	cortex	exp1	7			0.95
0.84	50149	219	745	91	0.32	(220, 744, 90)	1.35	0.72	0.99	165	8	2	fca-3	cortex	exp1	7			0.643636
0.48	367091	281	416	94	0.32	(291, 421, 73)	2.54	0.44	1	4353	9	2	fca-3	cortex	exp1	7			2.1
0.5	319323	273	509	97	0.34	(287, 507, 78)	2.3	0.47	1	8	9	2	fca-3	cortex	exp1	7			1.83
0.73	168392	280	577	98	0.31	(283, 574, 93)	2.48	0.64	1	41	9	2	fca-3	cortex	exp1	7			1.84
0.63	88955	276	623	106	0.32	(281, 629, 104)	1.35	0.57	0.99	72	9	2	fca-3	cortex	exp1	7			0.793636
0.87	76522	275	656	107	0.34	(278, 660, 107)	1.73	0.76	1	85	9	2	fca-3	cortex	exp1	7			0.97
0.94	49422	276	689	106	0.32	(275, 686, 114)	1.64	0.74	0.82	123	9	2	fca-3	cortex	exp1	7			1.26
0.29	383202	291	190	66	0.35	(302, 201, 52)	1.41	0.26	0.91	4745	9	2	fca-3	cortex	exp1	7			1.28945
0.34	327876	288	314	78	0.31	(301, 315, 65)	1.63	0.3	0.94	4747	9	2	fca-3	cortex	exp1	7			1.43404
0.7	35347	273	740	112	0.3	(274, 741, 114)	0.83	0.65	0.84	157	9	2	fca-3	cortex	exp1	7			0.338095
0.87	33142	277	715	112	0.3	(277, 716, 118)	1.23	0.72	0.55	160	9	2	fca-3	cortex	exp1	7			1.51636
0.78	23094	271	771	116	0.3	(271, 772, 119)	0.93	0.68	0.51	190	9	2	fca-3	cortex	exp1	7			1.14353
0.44	190201	118	343	86	0.32	(127, 347, 78)	0.62	0.44	1	32	10	2	fca-3	epidermis	exp1	7			0.18
0.46	172759	112	432	96	0.32	(119, 431, 90)	0.61	0.46	1	40	10	2	fca-3	epidermis	exp1	7			0.15
0.48	144935	108	502	102	0.31	(113, 503, 82)	0.54	0.49	0.99	47	10	2	fca-3	epidermis	exp1	7			0.0554545
0.57	99409	107	560	105	0.31	(110, 560, 103)	0.8	0.56	1	67	10	2	fca-3	epidermis	exp1	7			0.24
0.7	83119	107	602	106	0.32	(108, 603, 113)	1.21	0.64	0.91	79	10	2	fca-3	epidermis	exp1	7			0.68967
0.5	68908	106	642	110	0.32	(103, 640, 112)	0.57	0.51	0.96	96	10	2	fca-3	epidermis	exp1	7			0.08375
0.5	59542	110	684	112	0.3	(106, 691, 109)	0.54	0.52	0.98	111	10	2	fca-3	epidermis	exp1	7			0.0310204
0.77	29815	106	721	118	0.31	(104, 721, 119)	1.05	0.69	0.54	171	10	2	fca-3	epidermis	exp1	7			1.25444
0.74	21574	108	755	120	0.3	(109, 756, 119)	0.85	0.66	0.51	194	10	2	fca-3	epidermis	exp1	7			1.00667
0.89	13196	108	784	121	0.3	(107, 786, 119)	0.7	0.63	0.27	240	10	2	fca-3	epidermis	exp1	7			1.96259
0.51	60624	164	429	74	0.43	(171, 432, 72)	0.67	0.48	1	31	1	3	fca-3	epidermis	exp1	7			0.19
0.48	60290	179	667	70	0.44	(183, 667, 73)	0.62	0.45	1	69	1	3	fca-3	epidermis	exp1	7			0.17
0.45	91648	169	326	73	0.47	(165, 329, 74)	0.58	0.43	1	77	1	3	fca-3	epidermis	exp1	7			0.15
0.51	36582	185	724	72	0.44	(187, 724, 71)	0.46	0.49	0.8	78	1	3	fca-3	epidermis	exp1	7			0.085
0.45	69780	170	363	71	0.43	(171, 363, 69)	0.54	0.44	1	106	1	3	fca-3	epidermis	exp1	7			0.1
0.74	67568	168	399	72	0.44	(171, 401, 75)	1.38	0.64	1	111	1	3	fca-3	epidermis	exp1	7			0.74
0.4	181464	165	202	80	0.43	(163, 205, 65)	0.51	0.39	1	6847	1	3	fca-3	epidermis	exp1	7			0.12
0.53	140085	170	272	75	0.43	(169, 275, 76)	1	0.49	1	6850	1	3	fca-3	epidermis	exp1	7			0.51
0.45	43616	176	522	70	0.44	(164, 522, 66)	0.5	0.43	0.95	6854	1	3	fca-3	epidermis	exp1	7			0.0963158
0.41	42262	170	546	69	0.44	(155, 548, 80)	0.48	0.38	0.94	6855	1	3	fca-3	epidermis	exp1	7			0.130638
0.63	54551	173	571	71	0.43	(176, 571, 72)	1.07	0.54	0.99	6856	1	3	fca-3	epidermis	exp1	7			0.540808
0.38	40819	176	596	70	0.44	(167, 597, 76)	0.41	0.37	0.92	6857	1	3	fca-3	epidermis	exp1	7			0.0756522
0.39	44425	175	619	69	0.44	(175, 619, 60)	0.37	0.39	0.9	6858	1	3	fca-3	epidermis	exp1	7			0.0211111
0.42	37272	178	640	70	0.44	(187, 640, 71)	0.41	0.41	0.88	6859	1	3	fca-3	epidermis	exp1	7			0.0559091
0.64	54662	181	700	71	0.43	(187, 700, 69)	0.9	0.58	1	6860	1	3	fca-3	epidermis	exp1	7			0.32
0.36	144461	163	130	80	0.43	(146, 112, 87)	0.42	0.35	0.98	6878	1	3	fca-3	epidermis	exp1	7			0.0785714
0.37	67661	172	494	74	0.43	(160, 495, 69)	0.42	0.36	0.95	242	1	3	fca-3	epidermis	exp1	7			0.0821053
0.43	63401	166	462	72	0.44	(167, 464, 71)	0.52	0.42	0.96	292	1	3	fca-3	epidermis	exp1	7			0.121667
0.54	24052	189	741	66	0.45	(187, 742, 60)	0.42	0.52	0.71	294	1	3	fca-3	epidermis	exp1	7			0.0715493
0.73	23092	194	793	71	0.43	(189, 794, 73)	0.76	0.62	0.83	300	1	3	fca-3	epidermis	exp1	7			0.295663
0.58	22968	191	757	64	0.42	(202, 758, 54)	0.43	0.54	0.59	303	1	3	fca-3	epidermis	exp1	7			0.188814
0.54	19522	186	773	70	0.44	(184, 774, 73)	0.4	0.53	0.73	333	1	3	fca-3	epidermis	exp1	7			0.0179452
0.7	17478	194	811	74	0.43	(196, 812, 71)	0.6	0.63	0.74	349	1	3	fca-3	epidermis	exp1	7			0.180811
1.06	16230	199	846	74	0.43	(197, 846, 76)	1.05	0.81	0.77	364	1	3	fca-3	epidermis	exp1	7			0.553636
1.07	12648	195	828	75	0.43	(196, 830, 74)	0.93	0.79	0.7	426	1	3	fca-3	epidermis	exp1	7			0.538571
0.42	77092	194	361	41	0.36	(195, 369, 31)	0.44	0.42	0.98	94	2	3	fca-3	epidermis	exp1	7			0.0289796
0.57	70036	191	258	42	0.37	(197, 262, 48)	1.04	0.49	1	105	2	3	fca-3	epidermis	exp1	7			0.55
0.45	65093	201	516	42	0.37	(201, 517, 39)	0.56	0.43	1	116	2	3	fca-3	epidermis	exp1	7			0.13
0.46	64160	195	420	41	0.36	(196, 421, 37)	0.55	0.45	1	118	2	3	fca-3	epidermis	exp1	7			0.1
0.51	57057	194	302	37	0.36	(196, 308, 39)	0.67	0.48	1	133	2	3	fca-3	epidermis	exp1	7			0.19
0.49	53748	204	562	41	0.36	(205, 559, 35)	0.61	0.47	1	145	2	3	fca-3	epidermis	exp1	7			0.14
0.4	53315	198	469	38	0.36	(198, 458, 31)	0.45	0.39	0.99	147	2	3	fca-3	epidermis	exp1	7			0.0645455
0.68	47028	208	635	40	0.36	(208, 634, 40)	1.11	0.57	1	168	2	3	fca-3	epidermis	exp1	7			0.54
0.41	46171	205	598	39	0.39	(207, 595, 29)	0.47	0.39	0.98	171	2	3	fca-3	epidermis	exp1	7			0.0895918
0.52	135428	187	188	42	0.37	(193, 187, 44)	1.32	0.46	0.98	6846	2	3	fca-3	epidermis	exp1	7			0.886939
0.59	38892	207	668	38	0.36	(210, 670, 37)	0.8	0.53	1	6865	2	3	fca-3	epidermis	exp1	7			0.27
0.6	155510	225	152	24	0.33	(228, 160, 34)	1.44	0.54	0.99	37	3	3	fca-3	epidermis	exp1	7			0.914545
0.59	149248	221	49	27	0.34	(222, 33, 38)	1.83	0.5	0.95	38	3	3	fca-3	epidermis	exp1	7			1.42632
0.61	145561	230	245	22	0.35	(232, 247, 28)	1.33	0.56	1	40	3	3	fca-3	epidermis	exp1	7			0.77
0.59	63447	231	313	22	0.35	(233, 319, 24)	0.82	0.55	1	119	3	3	fca-3	epidermis	exp1	7			0.27
0.76	58162	231	388	22	0.35	(235, 393, 25)	1.41	0.63	0.99	131	3	3	fca-3	epidermis	exp1	7			0.794242
0.74	54391	236	502	22	0.35	(239, 503, 24)	1.35	0.61	0.99	143	3	3	fca-3	epidermis	exp1	7			0.753636
0.6	53859	232	427	22	0.35	(234, 429, 23)	0.88	0.54	1	144	3	3	fca-3	epidermis	exp1	7			0.34
0.54	51725	231	350	21	0.32	(233, 353, 26)	0.69	0.51	1	151	3	3	fca-3	epidermis	exp1	7			0.18
0.55	48368	236	466	20	0.31	(242, 465, 15)	0.72	0.51	0.99	161	3	3	fca-3	epidermis	exp1	7			0.217273
0.57	48356	236	542	21	0.32	(237, 543, 21)	0.76	0.53	1	162	3	3	fca-3	epidermis	exp1	7			0.23
0.63	46973	237	579	22	0.35	(240, 582, 20)	0.94	0.55	1	169	3	3	fca-3	epidermis	exp1	7			0.39
0.94	42441	240	691	29	0.38	(241, 695, 31)	1.7	0.72	0.97	183	3	3	fca-3	epidermis	exp1	7			1.03258
0.83	40893	242	654	23	0.33	(242, 655, 29)	1.32	0.68	0.99	258	3	3	fca-3	epidermis	exp1	7			0.653333
0.92	28439	241	735	33	0.37	(241, 734, 34)	1.34	0.7	0.98	266	3	3	fca-3	epidermis	exp1	7			0.667347
0.94	34127	239	619	22	0.35	(241, 621, 25)	1.46	0.72	0.97	270	3	3	fca-3	epidermis	exp1	7			0.785155
0.54	231443	264	76	32	0.39	(269, 86, 31)	1.11	0.52	1	17	4	3	fca-3	epidermis	exp1	7			0.59
0.63	170792	269	183	29	0.38	(271, 183, 31)	1.28	0.59	1	33	4	3	fca-3	epidermis	exp1	7			0.69
0.4	98708	269	274	29	0.38	(270, 248, 20)	0.43	0.4	0.98	72	4	3	fca-3	epidermis	exp1	7			0.0387755
0.4	83348	270	341	28	0.35	(266, 325, 35)	0.41	0.39	0.99	84	4	3	fca-3	epidermis	exp1	7			0.0241414
0.51	42618	270	443	26	0.35	(274, 443, 24)	0.66	0.47	0.98	182	4	3	fca-3	epidermis	exp1	7			0.203469
0.56	41224	272	699	33	0.37	(273, 700, 32)	0.74	0.51	1	192	4	3	fca-3	epidermis	exp1	7			0.23
0.44	40624	273	387	28	0.35	(274, 388, 32)	0.48	0.42	0.99	197	4	3	fca-3	epidermis	exp1	7			0.0648485
0.5	40618	270	415	29	0.38	(273, 416, 30)	0.63	0.45	0.99	198	4	3	fca-3	epidermis	exp1	7			0.186364
0.78	40141	268	592	29	0.38	(271, 593, 28)	1.22	0.64	0.99	203	4	3	fca-3	epidermis	exp1	7			0.592323
0.75	32527	273	729	35	0.37	(273, 731, 33)	1.09	0.61	0.99	6867	4	3	fca-3	epidermis	exp1	7			0.49101
0.59	36612	275	667	31	0.35	(277, 670, 29)	0.76	0.53	1	226	4	3	fca-3	epidermis	exp1	7			0.23
0.53	35527	275	471	28	0.35	(276, 471, 26)	0.68	0.47	0.96	230	4	3	fca-3	epidermis	exp1	7			0.238333
0.47	35201	274	497	26	0.35	(276, 497, 22)	0.52	0.44	0.96	231	4	3	fca-3	epidermis	exp1	7			0.101667
0.84	34996	272	542	26	0.35	(276, 543, 25)	1.23	0.67	0.93	234	4	3	fca-3	epidermis	exp1	7			0.652581
0.62	34778	272	566	27	0.34	(275, 567, 25)	0.82	0.53	0.91	237	4	3	fca-3	epidermis	exp1	7			0.371099
0.46	33724	275	519	27	0.34	(277, 521, 21)	0.45	0.44	0.83	244	4	3	fca-3	epidermis	exp1	7			0.102169
0.68	32768	271	760	36	0.37	(272, 761, 35)	0.97	0.56	1	249	4	3	fca-3	epidermis	exp1	7			0.41
0.7	29594	270	790	39	0.39	(271, 791, 38)	0.86	0.62	0.99	261	4	3	fca-3	epidermis	exp1	7			0.248687
0.62	26270	273	639	27	0.34	(275, 639, 24)	0.75	0.53	0.96	276	4	3	fca-3	epidermis	exp1	7			0.25125
0.71	25577	272	616	27	0.34	(271, 616, 29)	0.77	0.6	0.81	281	4	3	fca-3	epidermis	exp1	7			0.350617
1.16	20023	269	817	42	0.37	(269, 817, 38)	1.37	0.85	0.86	328	4	3	fca-3	epidermis	exp1	7			0.743023
1.18	15841	266	861	49	0.4	(268, 862, 47)	1.17	0.94	0.83	370	4	3	fca-3	epidermis	exp1	7			0.469639
1.25	15761	265	882	52	0.38	(266, 883, 49)	1.24	1.04	0.85	373	4	3	fca-3	epidermis	exp1	7			0.418824
1.12	13942	269	838	46	0.38	(269, 839, 44)	1.12	0.86	0.86	398	4	3	fca-3	epidermis	exp1	7			0.442326
0.41	172613	347	110	40	0.36	(348, 115, 47)	0.69	0.39	1	32	5	3	fca-3	epidermis	exp1	7			0.3
0.4	143070	351	216	32	0.39	(343, 249, 32)	0.45	0.4	0.97	41	5	3	fca-3	epidermis	exp1	7			0.0639175
0.47	135584	350	302	32	0.39	(348, 304, 37)	0.78	0.45	1	43	5	3	fca-3	epidermis	exp1	7			0.33
0.41	93693	363	373	44	0.36	(359, 377, 29)	0.45	0.41	0.99	75	5	3	fca-3	epidermis	exp1	7			0.0445455
0.5	86708	358	448	43	0.38	(359, 449, 56)	0.64	0.48	1	80	5	3	fca-3	epidermis	exp1	7			0.16
0.43	82211	362	413	44	0.36	(353, 416, 28)	0.47	0.42	0.97	87	5	3	fca-3	epidermis	exp1	7			0.0645361
0.54	78785	355	486	42	0.37	(356, 487, 45)	0.73	0.51	1	92	5	3	fca-3	epidermis	exp1	7			0.22
0.63	69721	356	521	41	0.36	(355, 522, 42)	1.02	0.57	1	107	5	3	fca-3	epidermis	exp1	7			0.45
0.52	63354	355	553	40	0.36	(356, 553, 42)	0.73	0.49	1	120	5	3	fca-3	epidermis	exp1	7			0.24
1	55392	350	651	38	0.36	(351, 652, 42)	1.93	0.81	1	137	5	3	fca-3	epidermis	exp1	7			1.12
1.32	52223	343	734	44	0.36	(344, 736, 45)	2.72	1.01	0.99	149	5	3	fca-3	epidermis	exp1	7			1.73747
0.88	51069	347	707	42	0.37	(348, 707, 42)	1.51	0.74	0.98	155	5	3	fca-3	epidermis	exp1	7			0.800816
1	48152	350	679	39	0.39	(350, 680, 43)	1.72	0.81	0.98	163	5	3	fca-3	epidermis	exp1	7			0.945102
0.69	41335	342	763	46	0.38	(343, 764, 46)	0.89	0.62	0.97	191	5	3	fca-3	epidermis	exp1	7			0.297526
0.74	40262	337	789	49	0.4	(339, 790, 49)	1.03	0.65	0.96	201	5	3	fca-3	epidermis	exp1	7			0.422917
0.68	35182	350	610	39	0.39	(353, 610, 36)	0.74	0.6	0.72	232	5	3	fca-3	epidermis	exp1	7			0.427778
0.7	34946	350	626	40	0.36	(352, 628, 42)	0.82	0.59	0.76	235	5	3	fca-3	epidermis	exp1	7			0.488947
0.61	34298	352	577	37	0.36	(355, 577, 38)	0.55	0.56	0.66	240	5	3	fca-3	epidermis	exp1	7			0.273333
0.63	33154	354	593	39	0.39	(356, 594, 37)	0.64	0.56	0.71	247	5	3	fca-3	epidermis	exp1	7			0.341408
0.57	26843	334	833	54	0.38	(335, 836, 58)	0.54	0.57	0.96	273	5	3	fca-3	epidermis	exp1	7			-0.0075
0.71	24440	335	812	47	0.36	(337, 813, 54)	0.68	0.66	0.85	291	5	3	fca-3	epidermis	exp1	7			0.14
0.6	113228	310	116	20	0.31	(311, 121, 28)	1.36	0.53	0.99	56	6	3	fca-3	epidermis	exp1	7			0.843737
0.64	92746	314	184	18	0.31	(311, 186, 24)	1.31	0.56	0.98	76	6	3	fca-3	epidermis	exp1	7			0.776735
0.98	81180	315	413	18	0.31	(316, 417, 21)	2.36	0.8	1	89	6	3	fca-3	epidermis	exp1	7			1.56
0.93	77987	315	362	18	0.31	(314, 366, 24)	2.12	0.77	1	93	6	3	fca-3	epidermis	exp1	7			1.35
0.83	70920	311	251	16	0.31	(309, 256, 21)	1.93	0.66	1	104	6	3	fca-3	epidermis	exp1	7			1.27
0.6	65226	310	305	17	0.3	(307, 308, 18)	0.9	0.55	1	115	6	3	fca-3	epidermis	exp1	7			0.35
0.91	43357	308	719	28	0.35	(309, 720, 27)	1.42	0.77	1	180	6	3	fca-3	epidermis	exp1	7			0.65
0.72	39253	313	494	19	0.32	(310, 496, 20)	1.01	0.62	1	209	6	3	fca-3	epidermis	exp1	7			0.39
0.61	38430	313	463	19	0.32	(312, 460, 17)	0.8	0.55	1	213	6	3	fca-3	epidermis	exp1	7			0.25
1.02	37384	304	767	32	0.39	(304, 768, 31)	1.62	0.81	0.97	221	6	3	fca-3	epidermis	exp1	7			0.860103
1.06	37306	313	528	19	0.32	(313, 525, 21)	1.75	0.82	0.98	222	6	3	fca-3	epidermis	exp1	7			0.965714
1.41	36364	310	620	21	0.32	(310, 623, 23)	2.59	0.98	0.97	227	6	3	fca-3	epidermis	exp1	7			1.6901
1.33	35166	311	590	19	0.32	(311, 586, 23)	2.42	0.9	0.96	233	6	3	fca-3	epidermis	exp1	7			1.62083
1.22	34588	307	682	22	0.35	(309, 683, 28)	1.97	0.93	0.99	238	6	3	fca-3	epidermis	exp1	7			1.0599
1.09	33264	312	557	20	0.31	(314, 559, 18)	1.81	0.8	1	246	6	3	fca-3	epidermis	exp1	7			1.01
1.51	29855	310	652	22	0.35	(309, 651, 25)	2.41	1.07	0.98	260	6	3	fca-3	epidermis	exp1	7			1.38918
0.52	190711	372	118	69	0.44	(367, 116, 69)	1.16	0.48	1	25	7	3	fca-3	epidermis	exp1	7			0.68
0.54	132580	376	217	62	0.42	(374, 218, 62)	0.9	0.51	1	45	7	3	fca-3	epidermis	exp1	7			0.39
0.51	84937	376	286	63	0.42	(377, 291, 63)	0.82	0.47	1	82	7	3	fca-3	epidermis	exp1	7			0.35
0.4	68797	375	332	58	0.39	(373, 344, 71)	0.39	0.39	0.98	109	7	3	fca-3	epidermis	exp1	7			0.00795918
0.6	100066	406	408	75	0.43	(403, 410, 75)	1.16	0.54	1	11	8	3	fca-3	epidermis	exp1	7			0.62
0.41	222013	411	153	90	0.42	(405, 159, 91)	0.93	0.38	1	19	8	3	fca-3	epidermis	exp1	7			0.55
0.58	125484	407	346	78	0.42	(403, 345, 80)	1.32	0.52	1	48	8	3	fca-3	epidermis	exp1	7			0.8
0.71	83129	412	234	85	0.41	(407, 240, 84)	1.51	0.6	0.83	85	8	3	fca-3	epidermis	exp1	7			1.21928
0.64	81903	411	283	86	0.41	(407, 284, 83)	1.41	0.54	1	88	8	3	fca-3	epidermis	exp1	7			0.87
0.72	66171	399	461	69	0.44	(401, 464, 70)	1.32	0.62	1	113	8	3	fca-3	epidermis	exp1	7			0.7
0.9	52098	394	564	65	0.42	(393, 567, 67)	1.71	0.71	1	150	8	3	fca-3	epidermis	exp1	7			1
0.83	43974	381	653	63	0.42	(382, 649, 65)	1.4	0.66	0.99	178	8	3	fca-3	epidermis	exp1	7			0.754141
0.83	47957	398	497	65	0.42	(395, 499, 70)	1.43	0.68	1	6874	8	3	fca-3	epidermis	exp1	7			0.75
1.06	46849	396	531	65	0.42	(394, 529, 69)	2.07	0.79	1	6875	8	3	fca-3	epidermis	exp1	7			1.28
0.59	72381	391	606	67	0.43	(386, 603, 65)	0.88	0.54	1	6876	8	3	fca-3	epidermis	exp1	7			0.34
0.38	317456	208	175	92	0.4	(229, 173, 70)	1.93	0.35	1	13	9	3	fca-3	cortex	exp1	7			1.58
0.32	73253	234	488	65	0.42	(259, 487, 55)	0.35	0.32	0.99	98	9	3	fca-3	cortex	exp1	7			0.0335354
0.35	71449	233	404	67	0.43	(237, 404, 58)	0.4	0.34	0.98	103	9	3	fca-3	cortex	exp1	7			0.0681633
0.44	62353	235	376	65	0.42	(235, 378, 69)	0.67	0.4	0.96	121	9	3	fca-3	cortex	exp1	7			0.297917
0.38	57111	231	431	68	0.42	(237, 430, 64)	0.46	0.36	0.92	132	9	3	fca-3	cortex	exp1	7			0.14
0.52	61221	236	539	65	0.42	(236, 540, 66)	0.84	0.45	0.93	142	9	3	fca-3	cortex	exp1	7			0.453226
0.47	48071	237	613	64	0.42	(239, 613, 65)	0.64	0.42	0.93	164	9	3	fca-3	cortex	exp1	7			0.268172
0.57	71488	237	631	73	0.47	(236, 638, 66)	0.92	0.51	0.96	166	9	3	fca-3	cortex	exp1	7			0.448333
0.43	51681	239	516	67	0.43	(242, 517, 73)	0.51	0.41	0.9	170	9	3	fca-3	cortex	exp1	7			0.156667
0.42	82187	238	283	64	0.42	(234, 284, 70)	0.83	0.37	1	6828	9	3	fca-3	cortex	exp1	7			0.46
0.42	81066	234	316	65	0.42	(229, 316, 71)	0.77	0.37	1	6829	9	3	fca-3	cortex	exp1	7			0.4
0.47	84608	239	349	64	0.42	(238, 350, 68)	0.76	0.43	1	6830	9	3	fca-3	cortex	exp1	7			0.33
0.41	61147	236	590	72	0.44	(242, 595, 83)	0.48	0.39	0.88	176	9	3	fca-3	cortex	exp1	7			0.155455
0.33	80406	237	459	65	0.42	(253, 457, 73)	0.36	0.32	0.98	6838	9	3	fca-3	cortex	exp1	7			0.0473469
0.45	52711	240	565	68	0.42	(237, 565, 71)	0.6	0.41	0.89	189	9	3	fca-3	cortex	exp1	7			0.264157
0.49	169235	226	234	71	0.43	(229, 235, 64)	1.71	0.42	1	6848	9	3	fca-3	cortex	exp1	7			1.29
0.42	215900	222	103	77	0.44	(230, 105, 75)	1.37	0.37	1	6879	9	3	fca-3	cortex	exp1	7			1
0.49	77888	236	657	78	0.42	(245, 657, 83)	0.69	0.47	1	6898	9	3	fca-3	cortex	exp1	7			0.22
0.54	195783	309	207	65	0.42	(312, 205, 66)	2.14	0.46	1	24	10	3	fca-3	cortex	exp1	7			1.68
0.67	86821	313	379	62	0.42	(312, 378, 63)	1.8	0.53	1	79	10	3	fca-3	cortex	exp1	7			1.27
1.12	56820	302	639	54	0.38	(305, 639, 55)	2.65	0.81	0.99	134	10	3	fca-3	cortex	exp1	7			1.86677
0.61	55643	308	458	56	0.43	(306, 459, 60)	1.01	0.52	0.95	136	10	3	fca-3	cortex	exp1	7			0.543158
0.89	48879	310	511	55	0.4	(308, 512, 58)	1.72	0.68	0.96	159	10	3	fca-3	cortex	exp1	7			1.11167
0.8	45750	303	432	54	0.38	(307, 433, 53)	1.42	0.63	0.98	172	10	3	fca-3	cortex	exp1	7			0.81898
0.44	115269	310	343	59	0.42	(313, 344, 60)	0.8	0.41	1	6831	10	3	fca-3	cortex	exp1	7			0.39
0.88	43668	308	485	57	0.4	(307, 485, 60)	1.67	0.65	0.96	179	10	3	fca-3	cortex	exp1	7			1.08958
0.54	94896	310	310	63	0.42	(312, 312, 66)	1.37	0.45	1	6832	10	3	fca-3	cortex	exp1	7			0.92
0.54	190527	303	261	62	0.42	(311, 264, 63)	1.96	0.46	1	6833	10	3	fca-3	cortex	exp1	7			1.5
0.77	37949	284	778	63	0.42	(294, 780, 60)	1.03	0.67	0.95	6870	10	3	fca-3	cortex	exp1	7			0.414211
0.79	72295	286	676	62	0.42	(303, 678, 55)	2.06	0.6	0.99	6871	10	3	fca-3	cortex	exp1	7			1.48081
0.63	37806	308	558	56	0.43	(311, 559, 55)	0.83	0.53	0.83	217	10	3	fca-3	cortex	exp1	7			0.47
0.58	36621	311	536	54	0.38	(307, 536, 53)	0.79	0.49	0.9	225	10	3	fca-3	cortex	exp1	7			0.387778
0.56	56913	315	409	64	0.42	(318, 409, 64)	1.01	0.46	0.91	6882	10	3	fca-3	cortex	exp1	7			0.64989
0.89	34587	301	708	59	0.42	(302, 709, 60)	1.48	0.65	0.9	239	10	3	fca-3	cortex	exp1	7			0.994444
0.9	27872	284	730	65	0.42	(298, 731, 59)	1.12	0.7	0.75	6900	10	3	fca-3	cortex	exp1	7			0.793333
0.71	43720	304	581	53	0.39	(308, 582, 45)	1.04	0.61	0.92	6916	10	3	fca-3	cortex	exp1	7			0.520435
0.65	39839	299	606	54	0.38	(304, 605, 58)	0.89	0.56	0.95	6917	10	3	fca-3	cortex	exp1	7			0.376842
0.6	267657	305	138	71	0.43	(313, 135, 63)	3.16	0.5	1	6919	10	3	fca-3	cortex	exp1	7			2.66
0.46	339520	301	50	73	0.47	(303, 48, 66)	3.1	0.38	1	6920	10	3	fca-3	cortex	exp1	7			2.72
0.81	26823	297	753	58	0.39	(301, 754, 60)	1.08	0.63	0.94	274	10	3	fca-3	cortex	exp1	7			0.518936
0.39	255920	150	133	100	0.33	(153, 139, 103)	0.47	0.39	1	8	1	4	fca-3	epidermis	exp1	7			0.08
0.73	137709	162	509	76	0.33	(167, 509, 77)	1.77	0.65	1	14	1	4	fca-3	epidermis	exp1	7			1.12
0.4	164988	148	263	99	0.31	(151, 251, 80)	0.44	0.41	0.99	20	1	4	fca-3	epidermis	exp1	7			0.0344444
0.42	102661	157	330	90	0.33	(152, 312, 84)	0.45	0.42	0.99	48	1	4	fca-3	epidermis	exp1	7			0.0345455
0.51	102631	157	440	84	0.33	(164, 443, 87)	0.69	0.49	1	49	1	4	fca-3	epidermis	exp1	7			0.2
0.55	70889	160	388	86	0.32	(162, 393, 87)	0.8	0.51	1	93	1	4	fca-3	epidermis	exp1	7			0.29
0.79	64850	167	567	73	0.32	(167, 570, 72)	1.51	0.67	1	109	1	4	fca-3	epidermis	exp1	7			0.84
0.55	62855	186	728	53	0.31	(185, 728, 51)	0.8	0.51	1	116	1	4	fca-3	epidermis	exp1	7			0.29
0.64	61259	172	606	69	0.31	(172, 607, 71)	1.03	0.57	1	122	1	4	fca-3	epidermis	exp1	7			0.46
0.65	60610	189	770	49	0.28	(190, 771, 48)	1.12	0.56	1	126	1	4	fca-3	epidermis	exp1	7			0.56
0.46	59492	177	645	62	0.29	(175, 637, 54)	0.51	0.45	0.99	131	1	4	fca-3	epidermis	exp1	7			0.0651515
0.42	57062	182	685	57	0.3	(175, 680, 48)	0.43	0.41	0.99	5728	1	4	fca-3	epidermis	exp1	7			0.0243434
0.46	205585	184	88	78	0.32	(186, 104, 86)	1.06	0.43	1	15	2	4	fca-3	epidermis	exp1	7			0.63
0.44	139215	183	203	67	0.31	(176, 211, 72)	0.49	0.44	1	28	2	4	fca-3	epidermis	exp1	7			0.05
0.45	138682	187	296	65	0.3	(187, 294, 76)	0.53	0.45	0.99	29	2	4	fca-3	epidermis	exp1	7			0.0853535
0.57	131174	191	378	65	0.3	(193, 382, 65)	0.92	0.54	1	32	2	4	fca-3	epidermis	exp1	7			0.38
0.64	108436	190	454	59	0.3	(194, 457, 61)	1.19	0.59	1	45	2	4	fca-3	epidermis	exp1	7			0.6
0.4	69979	223	825	36	0.28	(211, 818, 25)	0.4	0.4	0.95	96	2	4	fca-3	epidermis	exp1	7			0.0210526
0.51	66807	195	515	55	0.28	(188, 512, 45)	0.6	0.5	1	103	2	4	fca-3	epidermis	exp1	7			0.1
0.52	66437	205	616	44	0.26	(207, 617, 40)	0.58	0.51	1	104	2	4	fca-3	epidermis	exp1	7			0.07
0.5	64343	222	784	34	0.24	(222, 790, 43)	0.56	0.49	1	110	2	4	fca-3	epidermis	exp1	7			0.07
0.46	62104	194	553	49	0.28	(188, 552, 53)	0.49	0.45	1	119	2	4	fca-3	epidermis	exp1	7			0.04
0.7	58869	215	711	33	0.25	(215, 714, 34)	1.16	0.61	1	135	2	4	fca-3	epidermis	exp1	7			0.55
0.46	58349	201	586	47	0.28	(204, 583, 35)	0.49	0.45	1	137	2	4	fca-3	epidermis	exp1	7			0.04
0.52	58087	208	650	41	0.26	(209, 653, 47)	0.6	0.51	1	138	2	4	fca-3	epidermis	exp1	7			0.09
0.68	50486	217	745	30	0.23	(219, 746, 34)	1.05	0.59	1	158	2	4	fca-3	epidermis	exp1	7			0.46
0.54	49545	212	678	37	0.25	(214, 679, 37)	0.63	0.52	0.99	161	2	4	fca-3	epidermis	exp1	7			0.116364
0.4	45792	224	866	36	0.28	(219, 867, 30)	0.4	0.4	0.99	176	2	4	fca-3	epidermis	exp1	7			0.0040404
0.48	42212	230	904	31	0.23	(232, 904, 33)	0.53	0.46	0.99	188	2	4	fca-3	epidermis	exp1	7			0.0753535
0.45	28748	234	964	28	0.22	(237, 968, 36)	0.42	0.45	0.9	238	2	4	fca-3	epidermis	exp1	7			0.0166667
0.48	27251	234	938	27	0.22	(227, 939, 25)	0.44	0.47	0.91	245	2	4	fca-3	epidermis	exp1	7			0.0135165
0.9	17568	239	988	26	0.22	(237, 989, 25)	0.97	0.73	0.91	310	2	4	fca-3	epidermis	exp1	7			0.335934
0.47	304828	233	131	75	0.31	(227, 138, 79)	0.72	0.46	1	4	3	4	fca-3	epidermis	exp1	7			0.26
0.5	153958	239	305	70	0.34	(238, 310, 76)	0.82	0.48	1	21	3	4	fca-3	epidermis	exp1	7			0.34
0.39	152900	232	210	71	0.31	(224, 215, 51)	0.41	0.38	0.98	22	3	4	fca-3	epidermis	exp1	7			0.0383673
0.56	137050	232	259	71	0.31	(232, 260, 73)	1.07	0.52	1	30	3	4	fca-3	epidermis	exp1	7			0.55
0.58	125096	243	353	65	0.3	(245, 355, 69)	1.16	0.53	1	34	3	4	fca-3	epidermis	exp1	7			0.63
0.46	89103	231	474	62	0.29	(228, 475, 62)	0.58	0.45	1	61	3	4	fca-3	epidermis	exp1	7			0.13
0.38	86584	236	553	59	0.3	(231, 543, 42)	0.41	0.38	1	65	3	4	fca-3	epidermis	exp1	7			0.03
0.39	79091	235	512	63	0.33	(232, 511, 43)	0.42	0.39	0.98	72	3	4	fca-3	epidermis	exp1	7			0.0385714
0.51	78572	229	436	65	0.3	(232, 438, 74)	0.65	0.49	1	73	3	4	fca-3	epidermis	exp1	7			0.16
0.54	76919	230	398	67	0.31	(232, 401, 71)	0.77	0.5	1	78	3	4	fca-3	epidermis	exp1	7			0.27
0.37	71500	247	627	49	0.28	(237, 627, 37)	0.39	0.37	0.98	90	3	4	fca-3	epidermis	exp1	7			0.0279592
0.61	61638	263	892	29	0.26	(263, 892, 26)	1.02	0.53	1	121	3	4	fca-3	epidermis	exp1	7			0.49
0.65	61122	259	857	28	0.22	(261, 857, 29)	1.11	0.57	1	124	3	4	fca-3	epidermis	exp1	7			0.54
0.47	59945	260	689	35	0.25	(262, 689, 38)	0.56	0.44	0.97	129	3	4	fca-3	epidermis	exp1	7			0.13732
0.38	59059	249	660	45	0.26	(244, 658, 30)	0.38	0.38	0.99	134	3	4	fca-3	epidermis	exp1	7			0.00383838
0.58	58485	264	737	35	0.25	(267, 738, 39)	0.84	0.52	0.92	136	3	4	fca-3	epidermis	exp1	7			0.393043
0.35	57670	241	591	54	0.28	(236, 593, 66)	0.34	0.35	0.98	140	3	4	fca-3	epidermis	exp1	7			-0.00306122
0.54	54451	261	713	36	0.28	(264, 715, 38)	0.69	0.49	0.9	146	3	4	fca-3	epidermis	exp1	7			0.276667
0.67	53069	271	780	32	0.24	(273, 780, 33)	0.92	0.59	0.81	152	3	4	fca-3	epidermis	exp1	7			0.545802
0.48	49605	264	759	32	0.24	(267, 758, 29)	0.53	0.46	0.86	160	3	4	fca-3	epidermis	exp1	7			0.156279
0.7	46455	268	798	34	0.24	(270, 799, 33)	0.94	0.59	0.76	172	3	4	fca-3	epidermis	exp1	7			0.646842
0.48	44964	271	833	35	0.25	(276, 834, 31)	0.5	0.45	0.79	179	3	4	fca-3	epidermis	exp1	7			0.182911
0.57	36939	275	917	23	0.22	(278, 914, 17)	0.57	0.53	0.81	205	3	4	fca-3	epidermis	exp1	7			0.173704
0.5	36496	277	955	24	0.21	(279, 957, 26)	0.5	0.48	0.86	208	3	4	fca-3	epidermis	exp1	7			0.101395
0.48	36453	271	815	29	0.26	(272, 814, 23)	0.4	0.46	0.71	210	3	4	fca-3	epidermis	exp1	7			0.10338
0.55	33507	277	934	23	0.22	(277, 935, 21)	0.53	0.51	0.73	214	3	4	fca-3	epidermis	exp1	7			0.216027
0.54	24083	276	976	24	0.21	(281, 977, 23)	0.48	0.5	0.8	260	3	4	fca-3	epidermis	exp1	7			0.1
0.57	287759	288	84	68	0.3	(292, 99, 79)	2.4	0.51	1	5	4	4	fca-3	epidermis	exp1	7			1.89
0.58	267589	288	213	65	0.3	(288, 220, 72)	2.05	0.53	1	6	4	4	fca-3	epidermis	exp1	7			1.52
0.62	230546	296	320	59	0.3	(299, 328, 70)	1.79	0.57	1	10	4	4	fca-3	epidermis	exp1	7			1.22
0.78	98903	311	506	57	0.3	(308, 511, 57)	1.62	0.69	1	54	4	4	fca-3	epidermis	exp1	7			0.93
0.79	96984	312	565	53	0.31	(310, 566, 54)	1.78	0.69	1	56	4	4	fca-3	epidermis	exp1	7			1.09
0.63	77045	303	400	58	0.28	(306, 403, 63)	0.99	0.58	1	77	4	4	fca-3	epidermis	exp1	7			0.41
0.6	73941	316	616	49	0.28	(315, 617, 49)	0.98	0.55	1	84	4	4	fca-3	epidermis	exp1	7			0.43
0.59	70749	315	660	47	0.28	(315, 661, 41)	0.86	0.55	1	94	4	4	fca-3	epidermis	exp1	7			0.31
0.68	65600	305	448	57	0.3	(306, 451, 59)	1.14	0.61	1	107	4	4	fca-3	epidermis	exp1	7			0.53
0.54	63629	323	896	37	0.25	(317, 900, 18)	0.79	0.49	0.9	112	4	4	fca-3	epidermis	exp1	7			0.387778
0.7	62110	319	803	38	0.25	(318, 802, 37)	1.27	0.59	1	118	4	4	fca-3	epidermis	exp1	7			0.68
0.68	57301	318	938	31	0.23	(316, 942, 16)	0.84	0.63	0.9	141	4	4	fca-3	epidermis	exp1	7			0.303333
0.57	44992	319	979	33	0.25	(319, 982, 38)	0.69	0.53	0.99	178	4	4	fca-3	epidermis	exp1	7			0.16697
0.5	43660	312	697	45	0.26	(307, 692, 35)	0.51	0.49	0.96	181	4	4	fca-3	epidermis	exp1	7			0.04125
0.64	42371	322	839	38	0.25	(322, 838, 38)	0.89	0.56	0.97	186	4	4	fca-3	epidermis	exp1	7			0.357526
0.49	40147	313	720	42	0.27	(307, 722, 43)	0.52	0.47	0.93	194	4	4	fca-3	epidermis	exp1	7			0.0891398
0.57	39354	317	766	37	0.25	(317, 767, 35)	0.73	0.51	0.95	196	4	4	fca-3	epidermis	exp1	7			0.258421
0.56	38626	315	743	39	0.26	(316, 743, 39)	0.69	0.5	0.9	198	4	4	fca-3	epidermis	exp1	7			0.266667
0.73	29042	327	863	36	0.28	(327, 864, 36)	0.86	0.63	0.89	237	4	4	fca-3	epidermis	exp1	7			0.336292
0.4	211128	333	212	96	0.31	(344, 241, 103)	0.43	0.4	0.99	12	5	4	fca-3	epidermis	exp1	7			0.0343434
0.43	208867	331	112	97	0.32	(314, 108, 92)	0.62	0.43	0.97	13	5	4	fca-3	epidermis	exp1	7			0.209175
0.42	169735	336	297	94	0.35	(334, 276, 80)	0.47	0.42	1	18	5	4	fca-3	epidermis	exp1	7			0.05
0.5	166783	341	370	94	0.35	(339, 374, 91)	0.76	0.5	1	19	5	4	fca-3	epidermis	exp1	7			0.26
0.44	144543	342	429	91	0.33	(323, 416, 84)	0.49	0.44	0.99	25	5	4	fca-3	epidermis	exp1	7			0.0549495
0.43	139546	347	484	89	0.31	(343, 470, 66)	0.51	0.42	0.98	26	5	4	fca-3	epidermis	exp1	7			0.100408
0.45	91425	374	820	86	0.32	(365, 816, 71)	0.66	0.44	0.96	60	5	4	fca-3	epidermis	exp1	7			0.2475
0.48	75093	350	525	88	0.33	(349, 526, 88)	0.62	0.47	0.98	81	5	4	fca-3	epidermis	exp1	7			0.162653
0.42	72599	349	551	85	0.31	(345, 550, 63)	0.46	0.41	0.98	87	5	4	fca-3	epidermis	exp1	7			0.0593878
0.44	68935	350	583	83	0.33	(351, 581, 68)	0.49	0.43	1	100	5	4	fca-3	epidermis	exp1	7			0.06
0.49	63101	361	842	74	0.32	(364, 843, 71)	0.63	0.47	0.96	113	5	4	fca-3	epidermis	exp1	7			0.18625
0.51	59995	351	730	70	0.34	(350, 729, 65)	0.68	0.47	0.99	128	5	4	fca-3	epidermis	exp1	7			0.216869
0.42	59223	351	700	73	0.32	(347, 698, 61)	0.44	0.41	0.99	133	5	4	fca-3	epidermis	exp1	7			0.0344444
0.59	57106	351	641	78	0.32	(351, 643, 78)	0.89	0.52	0.98	142	5	4	fca-3	epidermis	exp1	7			0.388163
0.69	54440	367	867	75	0.31	(365, 867, 72)	1.08	0.58	0.83	147	5	4	fca-3	epidermis	exp1	7			0.721205
0.53	54203	350	611	78	0.32	(350, 611, 76)	0.67	0.5	0.99	149	5	4	fca-3	epidermis	exp1	7			0.176768
0.43	54168	357	913	58	0.28	(366, 909, 53)	0.45	0.43	0.97	150	5	4	fca-3	epidermis	exp1	7			0.0339175
0.69	51708	369	887	71	0.31	(368, 887, 70)	1.03	0.59	0.88	157	5	4	fca-3	epidermis	exp1	7			0.580455
0.66	49521	350	670	76	0.33	(350, 671, 76)	0.98	0.58	0.99	162	5	4	fca-3	epidermis	exp1	7			0.409899
0.51	49210	350	787	63	0.33	(353, 788, 64)	0.69	0.47	1	163	5	4	fca-3	epidermis	exp1	7			0.22
0.45	47590	353	758	67	0.31	(354, 758, 59)	0.53	0.43	1	170	5	4	fca-3	epidermis	exp1	7			0.1
0.55	47088	354	983	64	0.31	(360, 985, 66)	0.71	0.5	0.97	171	5	4	fca-3	epidermis	exp1	7			0.231959
0.49	26477	354	940	58	0.28	(355, 939, 49)	0.41	0.47	0.76	246	5	4	fca-3	epidermis	exp1	7			0.0694737
0.49	21243	350	957	56	0.29	(354, 955, 44)	0.39	0.45	0.68	282	5	4	fca-3	epidermis	exp1	7			0.123529
0.37	126523	376	68	110	0.31	(367, 76, 113)	0.46	0.38	0.53	33	6	4	fca-3	epidermis	exp1	7			0.487925
0.94	97825	388	625	102	0.31	(384, 627, 103)	2.3	0.8	1	55	6	4	fca-3	epidermis	exp1	7			1.5
0.77	93929	389	732	98	0.33	(386, 733, 95)	1.87	0.66	1	58	6	4	fca-3	epidermis	exp1	7			1.21
0.44	87527	378	254	109	0.31	(372, 267, 99)	0.48	0.45	0.94	62	6	4	fca-3	epidermis	exp1	7			0.0606383
0.65	82560	390	567	104	0.36	(390, 570, 106)	1.13	0.6	0.96	68	6	4	fca-3	epidermis	exp1	7			0.577083
0.83	81855	388	675	98	0.33	(385, 677, 94)	1.81	0.72	0.99	69	6	4	fca-3	epidermis	exp1	7			1.10828
0.43	79583	385	394	109	0.31	(392, 374, 112)	0.49	0.44	0.61	70	6	4	fca-3	epidermis	exp1	7			0.363279
0.48	76238	386	457	107	0.33	(384, 444, 102)	0.51	0.48	1	79	6	4	fca-3	epidermis	exp1	7			0.03
0.42	74232	380	322	109	0.31	(379, 309, 105)	0.45	0.43	0.98	83	6	4	fca-3	epidermis	exp1	7			0.0291837
0.67	69759	389	513	106	0.31	(387, 519, 112)	1.23	0.61	0.61	99	6	4	fca-3	epidermis	exp1	7			1.40639
0.62	67530	387	782	90	0.33	(385, 783, 89)	1.02	0.56	1	101	6	4	fca-3	epidermis	exp1	7			0.46
0.4	97190	374	170	110	0.31	(367, 168, 113)	0.43	0.41	0.5	164	6	4	fca-3	epidermis	exp1	7			0.45
0.42	145389	201	208	110	0.31	(191, 215, 113)	1.02	0.39	0.54	24	7	4	fca-3	cortex	exp1	7			1.49889
0.43	136407	204	296	109	0.31	(200, 300, 113)	0.93	0.4	0.54	31	7	4	fca-3	cortex	exp1	7			1.32222
0.55	108393	210	428	107	0.33	(203, 431, 113)	1.1	0.51	0.54	46	7	4	fca-3	cortex	exp1	7			1.52704
0.44	101764	206	120	113	0.31	(194, 118, 113)	0.82	0.42	0.48	51	7	4	fca-3	cortex	exp1	7			1.28833
0.53	87054	246	822	94	0.35	(244, 826, 101)	0.77	0.51	0.96	64	7	4	fca-3	cortex	exp1	7			0.292083
0.48	77629	213	548	102	0.31	(208, 549, 108)	0.74	0.45	0.84	75	7	4	fca-3	cortex	exp1	7			0.430952
0.59	77131	218	575	101	0.36	(215, 576, 106)	1.16	0.49	0.91	76	7	4	fca-3	cortex	exp1	7			0.784725
0.46	74236	211	385	107	0.33	(204, 386, 113)	0.73	0.44	0.54	82	7	4	fca-3	cortex	exp1	7			0.911852
0.51	107150	234	744	92	0.31	(229, 743, 83)	0.79	0.49	0.96	92	7	4	fca-3	cortex	exp1	7			0.332917
0.46	70352	209	468	105	0.33	(208, 470, 113)	0.63	0.45	0.5	95	7	4	fca-3	cortex	exp1	7			0.81
0.38	69851	208	351	107	0.33	(201, 355, 113)	0.46	0.39	0.53	98	7	4	fca-3	cortex	exp1	7			0.477925
0.5	63746	212	522	105	0.33	(209, 523, 109)	0.78	0.46	0.78	111	7	4	fca-3	cortex	exp1	7			0.54
0.56	62978	211	495	103	0.31	(207, 496, 111)	0.92	0.5	0.66	115	7	4	fca-3	cortex	exp1	7			0.893939
0.48	105367	237	771	91	0.33	(229, 768, 84)	0.61	0.46	0.9	127	7	4	fca-3	cortex	exp1	7			0.217778
0.72	62290	219	624	96	0.31	(218, 624, 97)	1.38	0.6	0.9	130	7	4	fca-3	cortex	exp1	7			0.933333
0.52	77332	223	602	104	0.36	(215, 601, 102)	0.97	0.46	0.93	145	7	4	fca-3	cortex	exp1	7			0.583011
0.74	52004	224	720	85	0.31	(225, 721, 88)	1.18	0.62	0.82	155	7	4	fca-3	cortex	exp1	7			0.819024
0.63	51802	234	792	89	0.31	(230, 787, 81)	0.73	0.59	0.72	156	7	4	fca-3	cortex	exp1	7			0.423889
0.57	72981	227	663	98	0.33	(223, 664, 98)	0.94	0.51	0.82	5730	7	4	fca-3	cortex	exp1	7			0.636341
0.66	83085	231	705	94	0.35	(227, 700, 85)	1.08	0.62	0.78	173	7	4	fca-3	cortex	exp1	7			0.764615
0.67	67333	227	684	97	0.32	(224, 682, 92)	1.11	0.58	0.82	185	7	4	fca-3	cortex	exp1	7			0.773659
0.62	67091	226	642	99	0.31	(219, 644, 94)	0.97	0.55	0.76	190	7	4	fca-3	cortex	exp1	7			0.726316
0.64	39463	230	804	77	0.36	(233, 803, 79)	0.8	0.54	0.67	195	7	4	fca-3	cortex	exp1	7			0.65403
0.56	22085	240	841	77	0.36	(241, 842, 78)	0.55	0.48	0.78	273	7	4	fca-3	cortex	exp1	7			0.225128
0.5	220457	276	63	109	0.31	(280, 68, 113)	2.04	0.47	0.54	11	8	4	fca-3	cortex	exp1	7			3.30778
0.51	189718	271	176	108	0.32	(281, 177, 113)	1.98	0.44	0.54	17	8	4	fca-3	cortex	exp1	7			3.22667
0.63	121619	289	514	102	0.31	(294, 514, 105)	1.65	0.54	0.98	35	8	4	fca-3	cortex	exp1	7			1.14367
0.52	120286	286	478	99	0.31	(292, 481, 105)	1.21	0.46	0.98	36	8	4	fca-3	cortex	exp1	7			0.774694
0.57	118875	281	328	105	0.33	(291, 337, 113)	1.49	0.52	0.53	37	8	4	fca-3	cortex	exp1	7			2.29132
0.55	113103	281	402	104	0.36	(286, 409, 113)	1.46	0.48	0.54	40	8	4	fca-3	cortex	exp1	7			2.2237
0.51	111067	287	547	100	0.33	(290, 546, 102)	1.02	0.48	1	42	8	4	fca-3	cortex	exp1	7			0.54
0.36	109895	273	247	106	0.31	(282, 252, 111)	0.47	0.37	0.68	43	8	4	fca-3	cortex	exp1	7			0.321176
0.42	142347	295	685	90	0.33	(273, 687, 77)	0.48	0.42	0.99	44	8	4	fca-3	cortex	exp1	7			0.0648485
0.57	102378	284	442	104	0.36	(289, 441, 106)	1.42	0.48	0.96	50	8	4	fca-3	cortex	exp1	7			0.999167
0.42	126533	293	610	95	0.32	(298, 612, 89)	0.53	0.42	1	52	8	4	fca-3	cortex	exp1	7			0.11
0.58	101488	291	578	96	0.31	(294, 579, 98)	1.26	0.53	1	53	8	4	fca-3	cortex	exp1	7			0.73
0.5	86170	282	367	105	0.33	(288, 370, 112)	0.88	0.47	0.6	66	8	4	fca-3	cortex	exp1	7			0.996667
0.48	79265	275	287	107	0.33	(284, 288, 113)	1	0.43	0.54	71	8	4	fca-3	cortex	exp1	7			1.42185
0.5	72483	309	869	69	0.31	(293, 868, 66)	0.57	0.49	1	88	8	4	fca-3	cortex	exp1	7			0.08
0.59	71551	299	718	80	0.33	(307, 722, 85)	0.66	0.57	1	89	8	4	fca-3	cortex	exp1	7			0.09
0.38	149351	294	648	100	0.33	(290, 649, 83)	0.44	0.39	0.95	105	8	4	fca-3	cortex	exp1	7			0.0731579
0.5	62704	309	836	73	0.32	(308, 835, 72)	0.77	0.45	0.99	117	8	4	fca-3	cortex	exp1	7			0.327778
0.42	52358	301	750	80	0.33	(314, 750, 84)	0.41	0.41	0.95	154	8	4	fca-3	cortex	exp1	7			0.0215789
0.47	40248	310	809	77	0.36	(310, 810, 75)	0.43	0.45	0.77	193	8	4	fca-3	cortex	exp1	7			0.108442
0.4	39124	306	771	75	0.31	(289, 771, 62)	0.33	0.4	0.79	197	8	4	fca-3	cortex	exp1	7			0.0177215
0.47	37984	311	790	78	0.32	(304, 791, 77)	0.49	0.45	0.86	199	8	4	fca-3	cortex	exp1	7			0.119767
0.59	36608	305	925	62	0.29	(311, 926, 64)	0.69	0.55	0.95	207	8	4	fca-3	cortex	exp1	7			0.176316
0.49	33379	311	901	69	0.31	(298, 901, 68)	0.54	0.45	0.93	216	8	4	fca-3	cortex	exp1	7			0.130645
0.45	75709	146	495	107	0.33	(161, 500, 109)	0.49	0.45	0.81	80	9	4	fca-3	epidermis	exp1	7			0.154938
0.39	69851	139	394	110	0.31	(134, 406, 106)	0.41	0.41	0.94	97	9	4	fca-3	epidermis	exp1	7			0.0261702
0.44	69053	148	540	107	0.33	(153, 543, 112)	0.56	0.44	0.61	5726	9	4	fca-3	epidermis	exp1	7			0.478033
0.38	48268	162	693	92	0.31	(163, 690, 78)	0.34	0.38	0.81	5729	9	4	fca-3	epidermis	exp1	7			0.0397531
0.38	65002	139	447	110	0.31	(131, 457, 107)	0.4	0.4	0.91	108	9	4	fca-3	epidermis	exp1	7			0.0395604
0.47	57693	156	623	100	0.33	(159, 622, 100)	0.61	0.45	0.97	139	9	4	fca-3	epidermis	exp1	7			0.178866
0.45	56709	159	648	96	0.31	(157, 650, 99)	0.51	0.43	0.95	143	9	4	fca-3	epidermis	exp1	7			0.106842
0.4	52945	162	673	90	0.33	(157, 671, 82)	0.4	0.39	0.91	153	9	4	fca-3	epidermis	exp1	7			0.0495604
0.39	48315	150	600	104	0.36	(164, 599, 103)	0.37	0.41	0.9	165	9	4	fca-3	epidermis	exp1	7			0.00111111
0.35	47980	165	711	92	0.31	(148, 714, 85)	0.29	0.33	0.79	168	9	4	fca-3	epidermis	exp1	7			0.0370886
0.34	45494	173	732	95	0.32	(180, 737, 113)	0.38	0.33	0.51	177	9	4	fca-3	epidermis	exp1	7			0.415098
0.47	44924	149	576	105	0.33	(155, 575, 107)	0.53	0.46	0.86	180	9	4	fca-3	epidermis	exp1	7			0.156279
0.39	43030	167	749	84	0.33	(156, 748, 78)	0.37	0.38	0.86	184	9	4	fca-3	epidermis	exp1	7			0.0502326
0.37	37640	173	803	71	0.31	(165, 803, 60)	0.33	0.37	0.9	201	9	4	fca-3	epidermis	exp1	7			-0.00333333
0.41	32476	172	766	79	0.31	(175, 766, 78)	0.38	0.39	0.81	218	9	4	fca-3	epidermis	exp1	7			0.0791358
0.38	31966	175	785	78	0.32	(186, 786, 84)	0.3	0.37	0.76	219	9	4	fca-3	epidermis	exp1	7			0.0247368
0.46	193941	152	451	84	0.29	(152, 458, 72)	0.58	0.46	1	31	1	5	fca-3	epidermis	exp1	7			0.12
0.37	192090	155	113	38	0.23	(163, 121, 23)	0.46	0.37	0.99	33	1	5	fca-3	epidermis	exp1	7			0.0946465
0.51	179605	147	389	76	0.28	(151, 391, 73)	0.66	0.5	1	37	1	5	fca-3	epidermis	exp1	7			0.16
0.53	177904	142	259	61	0.26	(146, 264, 68)	0.99	0.5	1	38	1	5	fca-3	epidermis	exp1	7			0.49
0.6	168059	144	325	70	0.29	(148, 330, 75)	1.13	0.57	1	40	1	5	fca-3	epidermis	exp1	7			0.56
0.47	159219	156	559	85	0.27	(155, 566, 65)	0.54	0.47	1	43	1	5	fca-3	epidermis	exp1	7			0.07
0.49	154066	152	186	51	0.25	(158, 187, 53)	0.75	0.47	1	47	1	5	fca-3	epidermis	exp1	7			0.28
0.51	144594	150	507	85	0.27	(152, 514, 79)	0.65	0.5	1	52	1	5	fca-3	epidermis	exp1	7			0.15
0.53	132881	156	607	88	0.27	(162, 607, 86)	0.72	0.52	1	57	1	5	fca-3	epidermis	exp1	7			0.2
0.46	66831	162	690	92	0.27	(164, 691, 93)	0.48	0.46	0.93	114	1	5	fca-3	epidermis	exp1	7			0.056129
0.6	63826	160	643	88	0.27	(166, 644, 91)	0.88	0.55	0.93	115	1	5	fca-3	epidermis	exp1	7			0.396237
0.57	62120	165	713	91	0.28	(167, 715, 93)	0.7	0.54	0.91	118	1	5	fca-3	epidermis	exp1	7			0.229231
0.49	59998	162	667	89	0.28	(164, 667, 88)	0.5	0.48	0.87	119	1	5	fca-3	epidermis	exp1	7			0.0947126
0.59	58293	164	735	93	0.28	(163, 735, 101)	0.74	0.54	0.79	122	1	5	fca-3	epidermis	exp1	7			0.396709
0.54	58185	164	755	96	0.28	(167, 755, 107)	0.64	0.5	0.55	123	1	5	fca-3	epidermis	exp1	7			0.663636
0.69	44864	168	806	99	0.27	(172, 807, 104)	0.87	0.6	0.64	142	1	5	fca-3	epidermis	exp1	7			0.759375
0.57	43311	165	774	97	0.32	(168, 773, 99)	0.57	0.53	0.71	146	1	5	fca-3	epidermis	exp1	7			0.272817
0.63	41066	166	825	101	0.29	(166, 825, 109)	0.83	0.54	0.41	153	1	5	fca-3	epidermis	exp1	7			1.48439
0.56	38962	166	789	98	0.27	(170, 790, 108)	0.54	0.53	0.42	157	1	5	fca-3	epidermis	exp1	7			0.755714
0.59	32766	168	844	103	0.29	(167, 844, 108)	0.66	0.52	0.46	175	1	5	fca-3	epidermis	exp1	7			0.914783
0.49	30275	170	861	102	0.27	(173, 861, 108)	0.44	0.47	0.41	184	1	5	fca-3	epidermis	exp1	7			0.603171
0.45	22716	172	905	106	0.27	(165, 905, 107)	0.36	0.44	0.48	213	1	5	fca-3	epidermis	exp1	7			0.31
0.43	22237	171	889	105	0.27	(170, 889, 109)	0.31	0.42	0.34	216	1	5	fca-3	epidermis	exp1	7			0.491765
0.46	21017	174	921	107	0.32	(171, 922, 109)	0.38	0.45	0.39	224	1	5	fca-3	epidermis	exp1	7			0.524359
0.42	20591	168	875	105	0.27	(177, 875, 106)	0.25	0.43	0.4	226	1	5	fca-3	epidermis	exp1	7			0.195
0.37	16641	173	938	109	0.26	(166, 940, 109)	0.26	0.41	0.34	254	1	5	fca-3	epidermis	exp1	7			0.354706
0.4	12671	171	955	110	0.27	(172, 955, 109)	0.28	0.41	0.34	310	1	5	fca-3	epidermis	exp1	7			0.413529
0.54	205250	182	432	34	0.22	(191, 435, 42)	1.04	0.51	1	25	2	5	fca-3	epidermis	exp1	7			0.53
0.45	199475	185	510	39	0.28	(201, 492, 44)	0.49	0.45	0.99	28	2	5	fca-3	epidermis	exp1	7			0.0449495
0.53	192753	181	353	26	0.21	(190, 353, 37)	1.37	0.48	0.98	32	2	5	fca-3	epidermis	exp1	7			0.917959
0.43	189513	181	271	19	0.2	(185, 275, 35)	0.75	0.41	1	35	2	5	fca-3	epidermis	exp1	7			0.34
0.36	149109	185	178	13	0.17	(192, 202, 28)	0.4	0.35	0.99	50	2	5	fca-3	epidermis	exp1	7			0.0540404
0.47	117410	194	581	51	0.25	(186, 580, 53)	0.52	0.47	1	67	2	5	fca-3	epidermis	exp1	7			0.05
0.48	55927	202	693	62	0.27	(198, 691, 67)	0.54	0.46	1	127	2	5	fca-3	epidermis	exp1	7			0.08
0.45	55296	206	790	71	0.27	(206, 793, 58)	0.49	0.45	0.99	129	2	5	fca-3	epidermis	exp1	7			0.0449495
0.37	52705	210	902	90	0.32	(201, 905, 83)	0.38	0.37	0.98	130	2	5	fca-3	epidermis	exp1	7			0.0177551
0.63	51913	201	660	62	0.27	(203, 658, 62)	0.95	0.56	1	131	2	5	fca-3	epidermis	exp1	7			0.39
0.5	51253	204	759	66	0.28	(201, 758, 66)	0.56	0.48	1	132	2	5	fca-3	epidermis	exp1	7			0.08
0.48	50374	203	724	64	0.27	(199, 727, 54)	0.52	0.47	1	134	2	5	fca-3	epidermis	exp1	7			0.05
0.65	47292	197	627	57	0.27	(198, 627, 58)	0.93	0.58	1	138	2	5	fca-3	epidermis	exp1	7			0.35
0.47	46933	208	849	82	0.27	(213, 850, 76)	0.55	0.45	0.99	139	2	5	fca-3	epidermis	exp1	7			0.105556
0.49	45799	208	823	77	0.28	(205, 822, 80)	0.56	0.47	0.98	141	2	5	fca-3	epidermis	exp1	7			0.101429
0.43	41665	215	929	93	0.28	(217, 930, 84)	0.43	0.43	0.89	152	2	5	fca-3	epidermis	exp1	7			0.0531461
0.46	36668	211	950	94	0.28	(214, 950, 95)	0.44	0.46	0.88	164	2	5	fca-3	epidermis	exp1	7			0.04
0.38	36617	208	876	85	0.27	(210, 876, 96)	0.35	0.38	0.93	165	2	5	fca-3	epidermis	exp1	7			-0.00365591
0.48	156090	234	395	22	0.23	(235, 399, 30)	0.59	0.48	1	45	3	5	fca-3	epidermis	exp1	7			0.11
0.49	143429	236	471	27	0.2	(226, 484, 22)	0.52	0.48	1	53	3	5	fca-3	epidermis	exp1	7			0.04
0.51	142549	237	543	32	0.23	(232, 551, 29)	0.57	0.51	1	54	3	5	fca-3	epidermis	exp1	7			0.06
0.49	128113	233	317	16	0.19	(237, 320, 21)	0.67	0.47	1	59	3	5	fca-3	epidermis	exp1	7			0.2
0.46	119470	232	227	13	0.17	(233, 232, 18)	0.8	0.43	1	63	3	5	fca-3	epidermis	exp1	7			0.37
0.58	117921	243	659	47	0.25	(248, 659, 55)	0.98	0.55	1	66	3	5	fca-3	epidermis	exp1	7			0.43
0.51	113690	239	606	42	0.25	(242, 613, 48)	0.71	0.49	1	70	3	5	fca-3	epidermis	exp1	7			0.22
0.64	84389	249	794	61	0.26	(248, 799, 62)	1.08	0.59	1	93	3	5	fca-3	epidermis	exp1	7			0.49
0.46	83108	255	916	79	0.28	(267, 914, 67)	0.48	0.46	0.99	96	3	5	fca-3	epidermis	exp1	7			0.0248485
0.64	83036	247	748	55	0.26	(247, 751, 54)	1.09	0.58	1	98	3	5	fca-3	epidermis	exp1	7			0.51
0.69	82377	250	836	66	0.28	(253, 838, 69)	1.28	0.61	1	99	3	5	fca-3	epidermis	exp1	7			0.67
0.5	81442	252	877	73	0.32	(262, 876, 60)	0.54	0.49	0.99	102	3	5	fca-3	epidermis	exp1	7			0.0554545
0.46	75185	245	707	51	0.25	(233, 707, 42)	0.49	0.46	0.99	106	3	5	fca-3	epidermis	exp1	7			0.0349495
0.45	201941	284	208	25	0.21	(298, 234, 13)	0.5	0.45	1	27	4	5	fca-3	epidermis	exp1	7			0.05
0.47	195218	282	286	29	0.25	(293, 264, 12)	0.54	0.46	0.99	30	4	5	fca-3	epidermis	exp1	7			0.0854545
0.43	142501	284	354	35	0.24	(298, 341, 24)	0.45	0.42	1	55	4	5	fca-3	epidermis	exp1	7			0.03
0.45	122284	285	403	39	0.28	(282, 415, 20)	0.48	0.44	0.99	61	4	5	fca-3	epidermis	exp1	7			0.0448485
0.48	120999	287	483	49	0.26	(287, 487, 29)	0.54	0.48	1	62	4	5	fca-3	epidermis	exp1	7			0.06
0.77	107361	287	587	58	0.26	(290, 588, 60)	1.54	0.69	1	73	4	5	fca-3	epidermis	exp1	7			0.85
0.53	100925	291	622	63	0.31	(292, 624, 66)	0.71	0.51	1	78	4	5	fca-3	epidermis	exp1	7			0.2
0.47	99697	283	445	43	0.25	(279, 446, 24)	0.52	0.47	1	79	4	5	fca-3	epidermis	exp1	7			0.05
0.41	97741	299	769	74	0.28	(321, 764, 67)	0.44	0.4	0.99	82	4	5	fca-3	epidermis	exp1	7			0.0444444
0.61	97453	285	551	54	0.25	(289, 551, 58)	0.93	0.58	1	83	4	5	fca-3	epidermis	exp1	7			0.35
0.53	96150	284	519	52	0.27	(289, 521, 48)	0.68	0.51	1	84	4	5	fca-3	epidermis	exp1	7			0.17
0.41	87192	300	837	89	0.28	(313, 837, 75)	0.44	0.41	0.99	89	4	5	fca-3	epidermis	exp1	7			0.0344444
0.43	85519	293	685	65	0.26	(285, 685, 47)	0.48	0.43	1	90	4	5	fca-3	epidermis	exp1	7			0.05
0.61	84395	296	655	63	0.31	(292, 656, 61)	0.93	0.56	0.98	95	4	5	fca-3	epidermis	exp1	7			0.38898
0.42	80233	297	737	71	0.27	(318, 737, 66)	0.44	0.41	0.96	103	4	5	fca-3	epidermis	exp1	7			0.0483333
0.52	63483	297	712	65	0.26	(298, 713, 67)	0.58	0.5	0.91	116	4	5	fca-3	epidermis	exp1	7			0.137363
0.43	59706	300	812	87	0.29	(293, 814, 77)	0.37	0.43	0.79	121	4	5	fca-3	epidermis	exp1	7			0.0383544
0.45	48985	300	795	78	0.27	(307, 795, 85)	0.37	0.44	0.76	136	4	5	fca-3	epidermis	exp1	7			0.0468421
0.51	47394	300	860	87	0.29	(298, 861, 89)	0.51	0.49	0.7	137	4	5	fca-3	epidermis	exp1	7			0.238571
0.48	40805	298	877	93	0.28	(299, 880, 92)	0.53	0.45	0.82	154	4	5	fca-3	epidermis	exp1	7			0.196341
0.41	36514	301	965	105	0.27	(297, 966, 109)	0.46	0.39	0.52	166	4	5	fca-3	epidermis	exp1	7			0.494615
0.35	35706	295	929	100	0.29	(290, 930, 88)	0.28	0.36	0.73	169	4	5	fca-3	epidermis	exp1	7			0.0235616
0.48	35319	300	896	98	0.27	(304, 896, 101)	0.49	0.45	0.76	170	4	5	fca-3	epidermis	exp1	7			0.194737
0.46	33309	299	912	100	0.29	(305, 913, 108)	0.38	0.45	0.4	172	4	5	fca-3	epidermis	exp1	7			0.5
0.33	33027	305	991	107	0.32	(318, 991, 109)	0.33	0.35	0.5	174	4	5	fca-3	epidermis	exp1	7			0.31
0.33	23406	299	944	102	0.27	(315, 943, 103)	0.22	0.33	0.56	209	4	5	fca-3	epidermis	exp1	7			0.0628571
0.43	158713	337	363	48	0.25	(327, 341, 58)	0.47	0.43	0.99	44	5	5	fca-3	epidermis	exp1	7			0.0447475
0.42	348358	337	249	39	0.28	(327, 182, 40)	0.49	0.42	0.91	48	5	5	fca-3	epidermis	exp1	7			0.118462
0.43	150917	339	435	54	0.25	(331, 419, 36)	0.45	0.43	1	49	5	5	fca-3	epidermis	exp1	7			0.02
0.49	159550	343	506	64	0.27	(341, 509, 64)	0.64	0.48	1	64	5	5	fca-3	epidermis	exp1	7			0.16
0.46	75653	343	558	68	0.27	(334, 559, 51)	0.48	0.45	1	105	5	5	fca-3	epidermis	exp1	7			0.03
0.46	74132	349	724	88	0.27	(345, 729, 88)	0.5	0.45	1	107	5	5	fca-3	epidermis	exp1	7			0.05
0.48	72865	348	626	78	0.27	(343, 625, 72)	0.54	0.47	1	108	5	5	fca-3	epidermis	exp1	7			0.07
0.43	68857	344	592	72	0.27	(337, 595, 61)	0.45	0.43	1	113	5	5	fca-3	epidermis	exp1	7			0.02
0.46	55972	348	657	81	0.28	(351, 660, 81)	0.48	0.45	0.99	126	5	5	fca-3	epidermis	exp1	7			0.0348485
0.46	55742	347	689	83	0.29	(342, 688, 72)	0.46	0.46	0.99	128	5	5	fca-3	epidermis	exp1	7			0.00464646
0.63	38172	348	816	105	0.27	(347, 815, 106)	0.95	0.55	0.74	160	5	5	fca-3	epidermis	exp1	7			0.733784
0.46	37284	345	757	98	0.27	(345, 759, 98)	0.49	0.45	0.96	162	5	5	fca-3	epidermis	exp1	7			0.0604167
0.43	36417	349	787	102	0.27	(348, 787, 94)	0.43	0.43	0.97	167	5	5	fca-3	epidermis	exp1	7			0.013299
0.68	33258	349	847	106	0.27	(349, 848, 109)	1.05	0.57	0.54	173	5	5	fca-3	epidermis	exp1	7			1.37444
0.46	27832	343	875	107	0.32	(346, 874, 109)	0.53	0.42	0.51	188	5	5	fca-3	epidermis	exp1	7			0.619216
0.49	18496	345	902	109	0.26	(344, 903, 109)	0.51	0.44	0.49	234	5	5	fca-3	epidermis	exp1	7			0.600816
0.33	250662	371	129	85	0.27	(379, 145, 57)	0.39	0.34	0.97	19	6	5	fca-3	epidermis	exp1	7			0.0620619
0.42	249766	372	335	89	0.28	(379, 321, 73)	0.5	0.43	0.99	20	6	5	fca-3	epidermis	exp1	7			0.0750505
0.34	230361	376	61	66	0.28	(362, 67, 55)	0.41	0.34	0.99	21	6	5	fca-3	epidermis	exp1	7			0.0741414
0.38	188012	372	259	87	0.29	(371, 277, 66)	0.44	0.39	0.99	36	6	5	fca-3	epidermis	exp1	7			0.0544444
0.38	174730	373	196	80	0.32	(373, 210, 59)	0.43	0.38	0.98	39	6	5	fca-3	epidermis	exp1	7			0.0587755
0.4	126000	373	405	95	0.27	(371, 394, 75)	0.47	0.4	0.99	60	6	5	fca-3	epidermis	exp1	7			0.0747475
0.39	113809	373	456	97	0.32	(370, 466, 81)	0.44	0.4	0.97	69	6	5	fca-3	epidermis	exp1	7			0.0536082
0.43	69249	377	502	102	0.27	(388, 497, 104)	0.48	0.43	0.87	112	6	5	fca-3	epidermis	exp1	7			0.121724
0.39	59766	374	579	105	0.27	(376, 575, 97)	0.42	0.41	0.98	120	6	5	fca-3	epidermis	exp1	7			0.0185714
0.42	57599	377	540	103	0.29	(375, 537, 92)	0.46	0.42	0.98	124	6	5	fca-3	epidermis	exp1	7			0.0493878
0.39	42386	377	618	108	0.27	(380, 612, 104)	0.41	0.42	0.85	150	6	5	fca-3	epidermis	exp1	7			0.0623529
0.38	36009	376	659	110	0.27	(383, 663, 108)	0.38	0.41	0.52	212	6	5	fca-3	epidermis	exp1	7			0.320769
0.39	31951	374	698	110	0.27	(375, 704, 107)	0.38	0.41	0.62	220	6	5	fca-3	epidermis	exp1	7			0.202903
0.35	411772	221	302	80	0.32	(221, 307, 66)	0.89	0.35	1	8	7	5	fca-3	cortex	exp1	7			0.54
0.44	303784	223	365	80	0.32	(219, 377, 73)	1.44	0.42	1	12	7	5	fca-3	cortex	exp1	7			1.02
0.34	292110	214	242	69	0.28	(218, 243, 56)	0.96	0.33	1	13	7	5	fca-3	cortex	exp1	7			0.63
0.37	263445	225	419	87	0.29	(228, 420, 80)	0.66	0.38	1	17	7	5	fca-3	cortex	exp1	7			0.28
0.48	220783	223	471	89	0.28	(224, 475, 87)	1.51	0.45	1	22	7	5	fca-3	cortex	exp1	7			1.06
0.58	215605	227	519	91	0.28	(227, 522, 90)	1.89	0.54	1	23	7	5	fca-3	cortex	exp1	7			1.35
0.48	118335	228	557	93	0.28	(225, 558, 93)	1.02	0.45	0.99	65	7	5	fca-3	cortex	exp1	7			0.580303
0.37	104704	236	694	99	0.27	(260, 692, 89)	0.41	0.37	0.97	74	7	5	fca-3	cortex	exp1	7			0.0526804
0.46	93710	232	584	94	0.28	(227, 585, 96)	0.75	0.42	0.91	86	7	5	fca-3	cortex	exp1	7			0.404176
0.4	87987	238	727	102	0.27	(255, 725, 93)	0.42	0.4	0.98	88	7	5	fca-3	cortex	exp1	7			0.0285714
0.43	85090	228	609	98	0.27	(229, 610, 99)	0.63	0.42	0.93	91	7	5	fca-3	cortex	exp1	7			0.257419
0.41	84791	238	661	100	0.29	(253, 660, 91)	0.44	0.41	0.99	92	7	5	fca-3	cortex	exp1	7			0.0344444
0.36	83780	238	761	103	0.29	(251, 757, 94)	0.44	0.37	0.99	94	7	5	fca-3	cortex	exp1	7			0.0744444
0.44	72296	231	633	98	0.27	(230, 634, 100)	0.59	0.41	0.93	109	7	5	fca-3	cortex	exp1	7			0.224409
0.52	62773	242	794	105	0.27	(238, 795, 109)	0.88	0.48	0.54	117	7	5	fca-3	cortex	exp1	7			1.14963
0.38	42818	242	824	108	0.27	(254, 826, 108)	0.38	0.39	0.59	148	7	5	fca-3	cortex	exp1	7			0.254068
0.39	39091	241	855	109	0.26	(253, 854, 109)	0.42	0.43	0.52	156	7	5	fca-3	cortex	exp1	7			0.377692
0.26	378541	228	176	61	0.26	(229, 203, 43)	0.34	0.26	0.96	4889	7	5	fca-3	cortex	exp1	7			0.0941667
0.26	452604	227	100	51	0.25	(205, 110, 21)	0.36	0.25	0.98	4898	7	5	fca-3	cortex	exp1	7			0.117347
0.34	456424	313	78	71	0.27	(325, 85, 65)	1.47	0.32	1	5	8	5	fca-3	cortex	exp1	7			1.15
0.41	342255	314	177	80	0.32	(315, 182, 75)	1.57	0.39	1	10	8	5	fca-3	cortex	exp1	7			1.18
0.44	284788	310	264	84	0.29	(308, 269, 82)	1.43	0.42	1	14	8	5	fca-3	cortex	exp1	7			1.01
0.43	260040	303	337	92	0.27	(312, 339, 93)	1.44	0.41	1	18	8	5	fca-3	cortex	exp1	7			1.03
0.51	195457	311	403	93	0.28	(315, 406, 97)	1.39	0.47	1	29	8	5	fca-3	cortex	exp1	7			0.92
0.47	113869	304	494	100	0.29	(310, 496, 109)	1.1	0.43	0.54	68	8	5	fca-3	cortex	exp1	7			1.60704
0.51	117296	310	456	93	0.28	(311, 458, 102)	1.13	0.45	0.96	71	8	5	fca-3	cortex	exp1	7			0.727083
0.46	99283	308	532	100	0.29	(314, 535, 109)	0.82	0.45	0.54	80	8	5	fca-3	cortex	exp1	7			1.06852
0.55	85243	307	569	101	0.29	(314, 568, 109)	1.11	0.5	0.54	100	8	5	fca-3	cortex	exp1	7			1.55556
0.4	49546	307	602	104	0.29	(293, 601, 97)	0.43	0.42	0.94	135	8	5	fca-3	cortex	exp1	7			0.0374468
0.37	43827	307	673	105	0.27	(303, 675, 99)	0.4	0.39	0.98	144	8	5	fca-3	cortex	exp1	7			0.0181633
0.37	42667	310	646	106	0.27	(310, 647, 104)	0.38	0.4	0.81	149	8	5	fca-3	cortex	exp1	7			0.0691358
0.41	38907	309	624	105	0.27	(304, 624, 103)	0.38	0.42	0.75	158	8	5	fca-3	cortex	exp1	7			0.0866667
0.38	30357	308	701	108	0.27	(301, 701, 107)	0.37	0.42	0.65	182	8	5	fca-3	cortex	exp1	7			0.149231
0.37	26696	307	725	109	0.26	(300, 726, 109)	0.33	0.41	0.48	190	8	5	fca-3	cortex	exp1	7			0.2775
0.37	26527	303	750	109	0.26	(291, 752, 109)	0.33	0.38	0.48	191	8	5	fca-3	cortex	exp1	7			0.3075
0.33	297453	122	254	107	0.31	(108, 235, 82)	0.41	0.34	1	13	1	6	fca-3	epidermis	exp1	7			0.07
0.42	189172	107	331	107	0.31	(121, 330, 97)	0.51	0.43	1	28	1	6	fca-3	epidermis	exp1	7			0.08
0.52	165495	109	380	107	0.31	(118, 387, 109)	1.19	0.49	1	35	1	6	fca-3	epidermis	exp1	7			0.7
0.58	157254	98	499	117	0.32	(112, 504, 100)	0.97	0.56	1	36	1	6	fca-3	epidermis	exp1	7			0.41
0.41	149727	103	436	116	0.28	(114, 438, 114)	0.52	0.41	1	42	1	6	fca-3	epidermis	exp1	7			0.11
0.56	105246	92	594	123	0.28	(103, 602, 116)	1.15	0.54	0.98	55	1	6	fca-3	epidermis	exp1	7			0.633469
0.46	90845	100	546	114	0.31	(111, 543, 107)	0.56	0.46	1	67	1	6	fca-3	epidermis	exp1	7			0.1
0.61	68805	90	643	127	0.28	(98, 646, 125)	1.07	0.57	1	97	1	6	fca-3	epidermis	exp1	7			0.5
0.57	58099	90	692	130	0.28	(93, 696, 132)	0.79	0.54	0.81	108	1	6	fca-3	epidermis	exp1	7			0.435309
0.49	289047	155	206	38	0.19	(160, 207, 43)	0.92	0.48	1	14	2	6	fca-3	epidermis	exp1	7			0.44
0.5	179280	155	109	30	0.18	(164, 112, 34)	1.12	0.46	0.99	32	2	6	fca-3	epidermis	exp1	7			0.671313
0.44	154361	159	296	49	0.24	(163, 310, 37)	0.52	0.44	1	37	2	6	fca-3	epidermis	exp1	7			0.08
0.51	152524	156	352	56	0.25	(155, 355, 56)	0.69	0.5	1	40	2	6	fca-3	epidermis	exp1	7			0.19
0.44	126002	154	404	61	0.23	(150, 403, 67)	0.49	0.44	1	47	2	6	fca-3	epidermis	exp1	7			0.05
0.47	114187	148	449	68	0.24	(149, 452, 73)	0.57	0.46	1	48	2	6	fca-3	epidermis	exp1	7			0.11
0.56	108933	151	494	70	0.25	(154, 498, 73)	0.94	0.52	1	49	2	6	fca-3	epidermis	exp1	7			0.42
0.56	94841	143	570	81	0.26	(147, 572, 80)	0.82	0.53	1	61	2	6	fca-3	epidermis	exp1	7			0.29
0.54	87514	151	533	76	0.26	(151, 534, 78)	0.78	0.51	1	69	2	6	fca-3	epidermis	exp1	7			0.27
0.97	84054	134	641	95	0.27	(138, 642, 97)	2.17	0.82	1	78	2	6	fca-3	epidermis	exp1	7			1.35
0.82	83413	131	704	110	0.28	(132, 705, 113)	1.69	0.71	1	79	2	6	fca-3	epidermis	exp1	7			0.98
0.51	76904	141	604	87	0.28	(140, 603, 93)	0.6	0.5	1	87	2	6	fca-3	epidermis	exp1	7			0.1
0.54	75466	130	735	115	0.27	(132, 735, 116)	0.68	0.52	1	89	2	6	fca-3	epidermis	exp1	7			0.16
0.91	74825	131	673	102	0.27	(135, 672, 104)	1.98	0.75	1	91	2	6	fca-3	epidermis	exp1	7			1.23
0.54	67892	126	765	122	0.27	(129, 766, 125)	0.73	0.53	1	99	2	6	fca-3	epidermis	exp1	7			0.2
0.6	59145	124	792	125	0.27	(125, 793, 126)	0.85	0.55	0.96	106	2	6	fca-3	epidermis	exp1	7			0.335417
1	56846	122	821	128	0.28	(126, 822, 131)	2.06	0.76	0.87	109	2	6	fca-3	epidermis	exp1	7			1.60782
0.5	179423	197	331	16	0.17	(204, 333, 21)	0.8	0.48	1	31	3	6	fca-3	epidermis	exp1	7			0.32
0.59	127523	178	624	61	0.23	(183, 627, 59)	0.78	0.57	1	45	3	6	fca-3	epidermis	exp1	7			0.21
0.48	98245	192	455	34	0.18	(195, 449, 27)	0.52	0.48	1	59	3	6	fca-3	epidermis	exp1	7			0.04
0.52	103028	186	559	48	0.2	(188, 562, 47)	0.63	0.51	1	64	3	6	fca-3	epidermis	exp1	7			0.12
0.48	89160	191	506	38	0.19	(180, 515, 39)	0.5	0.47	0.99	68	3	6	fca-3	epidermis	exp1	7			0.0350505
0.85	87272	162	846	112	0.27	(162, 845, 112)	1.75	0.74	1	70	3	6	fca-3	epidermis	exp1	7			1.01
0.47	81739	195	407	24	0.17	(201, 399, 16)	0.51	0.47	1	82	3	6	fca-3	epidermis	exp1	7			0.04
1.06	61976	177	670	70	0.25	(179, 671, 72)	2.1	0.87	0.99	102	3	6	fca-3	epidermis	exp1	7			1.25121
0.77	58652	171	753	89	0.27	(170, 754, 90)	1.18	0.69	0.98	107	3	6	fca-3	epidermis	exp1	7			0.514082
0.97	56493	174	699	75	0.25	(172, 700, 79)	1.76	0.81	0.98	110	3	6	fca-3	epidermis	exp1	7			0.985918
0.63	55462	169	781	97	0.31	(172, 781, 95)	0.79	0.6	0.97	113	3	6	fca-3	epidermis	exp1	7			0.214433
0.66	48537	165	807	101	0.29	(166, 809, 103)	0.86	0.61	0.98	123	3	6	fca-3	epidermis	exp1	7			0.267551
0.82	46732	172	728	79	0.27	(171, 727, 85)	1.24	0.7	0.96	127	3	6	fca-3	epidermis	exp1	7			0.591667
0.76	37727	159	903	124	0.31	(163, 905, 123)	1.02	0.66	0.9	136	3	6	fca-3	epidermis	exp1	7			0.473333
0.79	32734	167	881	118	0.28	(164, 880, 117)	0.95	0.7	0.91	141	3	6	fca-3	epidermis	exp1	7			0.343956
0.68	105467	247	350	11	0.16	(248, 349, 14)	1.56	0.59	1	54	4	6	fca-3	epidermis	exp1	7			0.97
0.65	91794	245	422	19	0.17	(244, 426, 24)	1.16	0.59	1	66	4	6	fca-3	epidermis	exp1	7			0.57
0.91	85308	233	559	45	0.21	(233, 562, 48)	2.27	0.74	1	75	4	6	fca-3	epidermis	exp1	7			1.53
0.64	77490	241	467	26	0.18	(243, 472, 30)	1.02	0.59	1	86	4	6	fca-3	epidermis	exp1	7			0.43
0.77	75815	238	515	34	0.18	(235, 520, 39)	1.44	0.67	1	88	4	6	fca-3	epidermis	exp1	7			0.77
0.88	73825	228	609	52	0.22	(227, 613, 58)	1.79	0.74	1	92	4	6	fca-3	epidermis	exp1	7			1.05
0.96	73409	225	655	63	0.27	(225, 657, 67)	2.07	0.79	1	93	4	6	fca-3	epidermis	exp1	7			1.28
0.99	64341	218	735	83	0.3	(220, 737, 87)	1.96	0.82	0.99	100	4	6	fca-3	epidermis	exp1	7			1.1598
0.86	56407	212	814	103	0.29	(213, 819, 107)	1.56	0.72	1	111	4	6	fca-3	epidermis	exp1	7			0.84
0.86	55908	216	776	93	0.28	(214, 781, 97)	1.44	0.74	1	112	4	6	fca-3	epidermis	exp1	7			0.7
0.69	54956	206	885	121	0.28	(204, 885, 122)	1.01	0.62	1	115	4	6	fca-3	epidermis	exp1	7			0.39
0.86	54672	222	698	72	0.25	(224, 702, 76)	1.37	0.76	1	116	4	6	fca-3	epidermis	exp1	7			0.61
0.66	51534	211	851	113	0.29	(210, 854, 112)	0.91	0.6	0.98	118	4	6	fca-3	epidermis	exp1	7			0.328571
0.7	41715	201	922	128	0.28	(200, 923, 129)	0.99	0.61	0.96	129	4	6	fca-3	epidermis	exp1	7			0.42125
0.49	225874	294	317	25	0.17	(299, 327, 46)	0.74	0.47	0.95	21	5	6	fca-3	epidermis	exp1	7			0.308947
0.59	206738	293	213	14	0.15	(291, 216, 15)	1.39	0.55	1	23	5	6	fca-3	epidermis	exp1	7			0.84
0.55	202132	290	400	37	0.18	(292, 405, 52)	0.85	0.53	0.99	24	5	6	fca-3	epidermis	exp1	7			0.328586
0.55	177704	286	470	49	0.24	(289, 476, 61)	0.65	0.54	1	33	5	6	fca-3	epidermis	exp1	7			0.11
0.54	94284	257	713	110	0.28	(258, 715, 104)	0.72	0.51	0.95	63	5	6	fca-3	epidermis	exp1	7			0.247895
0.81	85877	267	635	84	0.28	(268, 636, 87)	1.59	0.71	0.99	73	5	6	fca-3	epidermis	exp1	7			0.896061
0.5	84900	257	792	125	0.27	(261, 792, 130)	0.59	0.5	0.91	77	5	6	fca-3	epidermis	exp1	7			0.148352
0.5	82602	263	689	96	0.29	(264, 690, 107)	0.56	0.49	0.97	80	5	6	fca-3	epidermis	exp1	7			0.0873196
0.55	80388	273	580	66	0.28	(276, 580, 76)	0.69	0.53	1	83	5	6	fca-3	epidermis	exp1	7			0.16
0.55	79896	279	548	64	0.23	(280, 549, 68)	0.7	0.53	1	84	5	6	fca-3	epidermis	exp1	7			0.17
0.5	77915	281	516	54	0.21	(292, 518, 69)	0.63	0.48	0.96	85	5	6	fca-3	epidermis	exp1	7			0.17625
0.53	75188	271	608	77	0.27	(272, 608, 85)	0.6	0.51	1	90	5	6	fca-3	epidermis	exp1	7			0.09
0.48	69705	252	764	114	0.31	(256, 767, 108)	0.53	0.47	0.96	94	5	6	fca-3	epidermis	exp1	7			0.0820833
0.81	69455	266	662	90	0.31	(267, 663, 96)	1.5	0.7	0.96	95	5	6	fca-3	epidermis	exp1	7			0.8625
0.44	69452	257	740	112	0.27	(258, 742, 94)	0.46	0.44	0.94	96	5	6	fca-3	epidermis	exp1	7			0.0493617
0.54	68691	252	823	127	0.28	(252, 823, 135)	0.73	0.53	0.61	98	5	6	fca-3	epidermis	exp1	7			0.666721
0.35	312784	336	72	28	0.18	(321, 74, 29)	0.47	0.35	0.99	11	6	6	fca-3	epidermis	exp1	7			0.124747
0.52	304783	342	195	38	0.19	(340, 205, 41)	1.21	0.5	1	12	6	6	fca-3	epidermis	exp1	7			0.71
0.44	261054	344	300	53	0.22	(336, 326, 36)	0.52	0.43	0.99	15	6	6	fca-3	epidermis	exp1	7			0.0952525
0.55	241684	338	390	71	0.25	(336, 391, 70)	1.12	0.53	1	17	6	6	fca-3	epidermis	exp1	7			0.59
0.64	110221	334	451	78	0.26	(336, 453, 90)	1.24	0.59	1	26	6	6	fca-3	epidermis	exp1	7			0.65
0.48	105679	328	528	93	0.28	(325, 528, 94)	0.63	0.46	1	52	6	6	fca-3	epidermis	exp1	7			0.17
0.57	104751	335	489	86	0.28	(335, 494, 91)	0.99	0.53	1	56	6	6	fca-3	epidermis	exp1	7			0.46
0.62	103527	322	563	100	0.32	(321, 562, 104)	1.16	0.56	1	57	6	6	fca-3	epidermis	exp1	7			0.6
0.61	95142	315	632	116	0.28	(313, 630, 123)	1.13	0.56	1	60	6	6	fca-3	epidermis	exp1	7			0.57
0.47	94546	319	599	108	0.28	(318, 597, 109)	0.56	0.47	1	62	6	6	fca-3	epidermis	exp1	7			0.09
0.61	85811	312	667	119	0.27	(311, 666, 124)	1.01	0.56	1	74	6	6	fca-3	epidermis	exp1	7			0.45
0.5	49538	304	724	129	0.27	(306, 725, 136)	0.58	0.49	0.54	121	6	6	fca-3	epidermis	exp1	7			0.584074
0.54	48299	311	696	127	0.28	(304, 696, 136)	0.65	0.51	0.51	124	6	6	fca-3	epidermis	exp1	7			0.76451
0.43	32259	298	754	133	0.27	(302, 756, 136)	0.45	0.43	0.54	143	6	6	fca-3	epidermis	exp1	7			0.403333
0.78	92524	194	708	123	0.28	(195, 710, 123)	1.68	0.69	0.98	65	7	6	fca-3	cortex	exp1	7			1.02429
0.73	86142	196	680	116	0.28	(198, 682, 113)	1.44	0.65	0.99	72	7	6	fca-3	cortex	exp1	7			0.804545
0.56	113788	202	646	118	0.28	(199, 651, 110)	1.13	0.53	0.98	3684	7	6	fca-3	cortex	exp1	7			0.623061
0.7	63255	192	738	128	0.28	(191, 738, 131)	1.17	0.63	0.85	101	7	6	fca-3	cortex	exp1	7			0.746471
0.68	61911	187	764	129	0.27	(189, 765, 136)	1.17	0.62	0.52	103	7	6	fca-3	cortex	exp1	7			1.63
0.55	78950	212	552	89	0.27	(214, 554, 91)	0.91	0.5	1	3681	7	6	fca-3	cortex	exp1	7			0.41
0.47	113098	208	585	91	0.27	(205, 586, 92)	0.72	0.45	1	3682	7	6	fca-3	cortex	exp1	7			0.27
0.58	40236	189	793	133	0.27	(188, 794, 136)	0.72	0.56	0.51	132	7	6	fca-3	cortex	exp1	7			0.851765
0.58	36102	183	818	132	0.26	(184, 817, 136)	0.6	0.59	0.49	137	7	6	fca-3	cortex	exp1	7			0.63449
0.5	94679	201	618	102	0.27	(201, 621, 100)	0.77	0.47	1	3683	7	6	fca-3	cortex	exp1	7			0.3
0.33	166280	143	113	46	0.27	(160, 108, 37)	0.42	0.33	0.93	44	1	7	fca-3	epidermis	exp1	7			0.121613
0.71	108719	164	676	78	0.23	(164, 683, 81)	2.05	0.59	1	78	1	7	fca-3	epidermis	exp1	7			1.46
0.64	94338	167	725	84	0.24	(167, 729, 88)	1.52	0.54	1	86	1	7	fca-3	epidermis	exp1	7			0.98
0.54	83139	178	933	109	0.21	(179, 936, 108)	1.13	0.47	1	99	1	7	fca-3	epidermis	exp1	7			0.66
0.44	132165	165	778	95	0.22	(164, 762, 81)	0.51	0.43	1	108	1	7	fca-3	epidermis	exp1	7			0.08
0.38	66241	173	851	100	0.28	(174, 851, 100)	0.54	0.35	0.97	124	1	7	fca-3	epidermis	exp1	7			0.206701
0.4	64393	183	975	113	0.22	(182, 979, 116)	0.61	0.36	0.75	128	1	7	fca-3	epidermis	exp1	7			0.453333
0.46	57752	171	822	95	0.22	(167, 821, 97)	0.79	0.4	0.98	145	1	7	fca-3	epidermis	exp1	7			0.406122
0.51	53466	178	900	104	0.23	(180, 902, 105)	0.67	0.48	0.88	157	1	7	fca-3	epidermis	exp1	7			0.281364
0.51	43669	176	877	100	0.28	(176, 875, 95)	0.63	0.46	0.89	183	1	7	fca-3	epidermis	exp1	7			0.247865
0.36	157604	144	205	51	0.22	(154, 220, 46)	0.41	0.36	1	3806	1	7	fca-3	epidermis	exp1	7			0.05
0.38	136423	143	288	57	0.23	(130, 310, 64)	0.42	0.38	0.99	3808	1	7	fca-3	epidermis	exp1	7			0.0442424
0.44	112562	143	359	62	0.24	(151, 361, 61)	0.58	0.43	0.99	3811	1	7	fca-3	epidermis	exp1	7			0.155859
0.56	125893	146	429	68	0.23	(151, 434, 72)	1.1	0.52	0.98	3812	1	7	fca-3	epidermis	exp1	7			0.602449
0.47	111651	155	567	70	0.24	(159, 574, 71)	0.66	0.45	1	3815	1	7	fca-3	epidermis	exp1	7			0.21
0.52	108912	160	624	72	0.24	(165, 628, 75)	0.92	0.48	1	3818	1	7	fca-3	epidermis	exp1	7			0.44
0.66	138248	149	501	72	0.24	(154, 506, 77)	1.71	0.58	1	587	1	7	fca-3	epidermis	exp1	7			1.13
0.39	136806	175	229	22	0.23	(185, 229, 24)	0.5	0.38	1	53	2	7	fca-3	epidermis	exp1	7			0.12
0.64	115446	175	379	32	0.24	(180, 381, 36)	1.55	0.56	1	68	2	7	fca-3	epidermis	exp1	7			0.99
0.48	114903	174	305	26	0.21	(179, 312, 32)	0.88	0.44	1	69	2	7	fca-3	epidermis	exp1	7			0.44
0.66	92544	177	439	34	0.21	(182, 444, 40)	1.52	0.56	1	90	2	7	fca-3	epidermis	exp1	7			0.96
0.46	84436	180	497	39	0.25	(177, 501, 34)	0.53	0.45	1	98	2	7	fca-3	epidermis	exp1	7			0.08
0.53	82043	184	552	44	0.22	(186, 553, 48)	0.92	0.48	1	101	2	7	fca-3	epidermis	exp1	7			0.44
0.6	157926	216	339	21	0.19	(215, 342, 21)	1.36	0.55	1	45	3	7	fca-3	epidermis	exp1	7			0.81
0.42	139866	222	552	37	0.21	(221, 550, 33)	0.49	0.41	1	50	3	7	fca-3	epidermis	exp1	7			0.08
0.54	139728	217	414	25	0.2	(219, 420, 27)	1.09	0.5	1	51	3	7	fca-3	epidermis	exp1	7			0.59
0.54	133491	222	180	16	0.19	(227, 183, 10)	1.26	0.49	1	54	3	7	fca-3	epidermis	exp1	7			0.77
0.48	129245	226	94	15	0.19	(226, 97, 9)	0.97	0.44	1	56	3	7	fca-3	epidermis	exp1	7			0.53
0.67	126387	219	484	29	0.25	(222, 490, 31)	1.47	0.61	1	58	3	7	fca-3	epidermis	exp1	7			0.86
0.43	123501	218	260	19	0.2	(214, 253, 14)	0.49	0.42	0.99	61	3	7	fca-3	epidermis	exp1	7			0.0749495
0.79	120067	212	658	55	0.23	(212, 660, 56)	2	0.68	1	64	3	7	fca-3	epidermis	exp1	7			1.32
0.88	114902	212	609	47	0.22	(211, 612, 49)	2.42	0.74	1	70	3	7	fca-3	epidermis	exp1	7			1.68
0.69	66530	229	955	92	0.22	(228, 956, 93)	1.42	0.56	0.98	123	3	7	fca-3	epidermis	exp1	7			0.88898
0.67	65774	223	901	94	0.24	(224, 900, 90)	1.19	0.61	0.71	125	3	7	fca-3	epidermis	exp1	7			1.06606
0.82	61009	228	983	103	0.23	(229, 984, 102)	1.76	0.67	0.95	136	3	7	fca-3	epidermis	exp1	7			1.18263
0.53	56199	213	737	64	0.23	(215, 739, 65)	0.8	0.45	0.79	148	3	7	fca-3	epidermis	exp1	7			0.562658
0.56	54288	213	695	57	0.23	(215, 696, 60)	0.83	0.49	0.9	155	3	7	fca-3	epidermis	exp1	7			0.432222
0.88	51657	227	882	72	0.24	(226, 883, 80)	1.52	0.69	0.72	166	3	7	fca-3	epidermis	exp1	7			1.42111
0.64	50181	215	779	71	0.23	(214, 779, 70)	1.07	0.52	0.84	169	3	7	fca-3	epidermis	exp1	7			0.75381
0.52	48903	212	717	61	0.23	(214, 718, 63)	0.69	0.46	0.82	174	3	7	fca-3	epidermis	exp1	7			0.381463
0.46	47656	216	758	66	0.29	(217, 759, 71)	0.56	0.41	0.82	175	3	7	fca-3	epidermis	exp1	7			0.272927
0.54	45389	222	848	74	0.24	(225, 848, 72)	0.73	0.46	0.73	178	3	7	fca-3	epidermis	exp1	7			0.54
0.65	45282	228	933	101	0.23	(228, 936, 99)	0.9	0.6	0.65	179	3	7	fca-3	epidermis	exp1	7			0.784615
0.69	44380	218	796	74	0.24	(219, 798, 75)	0.95	0.57	0.75	180	3	7	fca-3	epidermis	exp1	7			0.696667
0.55	42264	222	864	77	0.25	(225, 866, 78)	0.68	0.47	0.69	185	3	7	fca-3	epidermis	exp1	7			0.515507
1	38347	224	917	85	0.23	(222, 917, 85)	1.52	0.76	0.77	194	3	7	fca-3	epidermis	exp1	7			1.21403
0.61	39545	221	831	73	0.28	(222, 833, 78)	0.62	0.56	0.73	3819	3	7	fca-3	epidermis	exp1	7			0.289315
0.64	46805	221	814	69	0.25	(221, 815, 69)	0.66	0.59	0.74	3820	3	7	fca-3	epidermis	exp1	7			0.301892
0.69	118753	260	628	28	0.21	(260, 633, 28)	1.87	0.59	1	66	4	7	fca-3	epidermis	exp1	7			1.28
0.47	113818	264	436	16	0.19	(267, 437, 17)	0.86	0.43	1	72	4	7	fca-3	epidermis	exp1	7			0.43
0.43	111788	264	503	17	0.18	(250, 509, 13)	0.5	0.42	1	75	4	7	fca-3	epidermis	exp1	7			0.08
0.42	104850	263	563	19	0.2	(250, 580, 15)	0.43	0.41	0.99	81	4	7	fca-3	epidermis	exp1	7			0.0243434
0.49	104796	260	687	31	0.2	(261, 689, 35)	0.82	0.46	1	82	4	7	fca-3	epidermis	exp1	7			0.36
0.69	102872	258	745	40	0.22	(263, 750, 45)	1.73	0.58	1	84	4	7	fca-3	epidermis	exp1	7			1.15
0.51	92780	263	791	48	0.22	(266, 791, 52)	0.85	0.46	1	88	4	7	fca-3	epidermis	exp1	7			0.39
0.41	71683	264	372	12	0.22	(256, 386, 10)	0.44	0.41	0.99	115	4	7	fca-3	epidermis	exp1	7			0.0344444
0.42	60549	266	839	54	0.23	(267, 842, 50)	0.55	0.4	1	138	4	7	fca-3	epidermis	exp1	7			0.15
0.68	58181	270	909	66	0.29	(271, 912, 67)	1.38	0.54	0.99	143	4	7	fca-3	epidermis	exp1	7			0.853939
0.53	57780	270	875	59	0.24	(271, 879, 60)	0.88	0.45	1	144	4	7	fca-3	epidermis	exp1	7			0.43
0.66	52931	271	941	73	0.28	(271, 941, 72)	1.23	0.54	0.99	161	4	7	fca-3	epidermis	exp1	7			0.702424
0.63	41981	274	973	82	0.23	(276, 972, 82)	1.01	0.5	0.93	186	4	7	fca-3	epidermis	exp1	7			0.586022
0.61	33585	272	995	85	0.23	(274, 995, 85)	0.88	0.48	0.89	207	4	7	fca-3	epidermis	exp1	7			0.508764
0.4	183572	319	232	16	0.19	(307, 201, 9)	0.46	0.39	0.98	41	5	7	fca-3	epidermis	exp1	7			0.0793878
0.33	145596	322	75	16	0.19	(333, 98, 9)	0.36	0.32	1	48	5	7	fca-3	epidermis	exp1	7			0.04
0.35	129908	317	308	22	0.23	(303, 291, 9)	0.37	0.35	0.99	55	5	7	fca-3	epidermis	exp1	7			0.0237374
0.39	123392	316	404	26	0.21	(316, 397, 9)	0.49	0.38	1	62	5	7	fca-3	epidermis	exp1	7			0.11
0.38	122782	318	450	30	0.2	(327, 441, 15)	0.42	0.37	0.99	63	5	7	fca-3	epidermis	exp1	7			0.0542424
0.36	119053	319	146	16	0.19	(303, 129, 11)	0.38	0.36	1	65	5	7	fca-3	epidermis	exp1	7			0.02
0.32	113499	315	538	33	0.22	(329, 531, 23)	0.35	0.32	0.99	73	5	7	fca-3	epidermis	exp1	7			0.0335354
0.37	109109	319	357	20	0.19	(333, 348, 9)	0.43	0.37	1	76	5	7	fca-3	epidermis	exp1	7			0.06
0.34	108925	311	617	42	0.23	(303, 616, 23)	0.37	0.33	1	77	5	7	fca-3	epidermis	exp1	7			0.04
0.35	106449	316	494	30	0.2	(304, 482, 13)	0.39	0.34	0.99	79	5	7	fca-3	epidermis	exp1	7			0.0539394
0.31	93334	313	653	45	0.23	(323, 652, 32)	0.34	0.31	0.99	87	5	7	fca-3	epidermis	exp1	7			0.0334343
0.33	87600	317	581	36	0.22	(332, 589, 48)	0.35	0.33	0.98	92	5	7	fca-3	epidermis	exp1	7			0.0271429
0.26	87597	323	934	90	0.27	(316, 930, 67)	0.3	0.25	0.97	93	5	7	fca-3	epidermis	exp1	7			0.0592784
0.32	86439	310	715	50	0.24	(328, 717, 57)	0.35	0.31	0.97	95	5	7	fca-3	epidermis	exp1	7			0.0508247
0.3	78819	311	743	56	0.27	(292, 741, 53)	0.31	0.3	0.93	105	5	7	fca-3	epidermis	exp1	7			0.0333333
0.31	77434	312	684	48	0.22	(305, 682, 31)	0.38	0.3	0.99	106	5	7	fca-3	epidermis	exp1	7			0.0838384
0.24	75464	319	964	92	0.22	(334, 967, 83)	0.25	0.24	0.97	110	5	7	fca-3	epidermis	exp1	7			0.017732
0.29	74322	319	851	72	0.24	(335, 852, 62)	0.3	0.28	0.96	111	5	7	fca-3	epidermis	exp1	7			0.0325
0.29	73289	317	823	66	0.29	(327, 826, 85)	0.32	0.29	0.96	112	5	7	fca-3	epidermis	exp1	7			0.0433333
0.29	69114	314	770	61	0.23	(309, 767, 41)	0.33	0.28	0.93	118	5	7	fca-3	epidermis	exp1	7			0.0748387
0.27	67703	318	879	76	0.24	(307, 877, 61)	0.29	0.27	0.94	121	5	7	fca-3	epidermis	exp1	7			0.0385106
0.3	65486	316	795	65	0.23	(310, 793, 47)	0.3	0.29	0.93	126	5	7	fca-3	epidermis	exp1	7			0.0325806
0.23	63358	321	993	100	0.28	(324, 994, 82)	0.25	0.23	0.93	130	5	7	fca-3	epidermis	exp1	7			0.0388172
0.27	60951	318	904	80	0.29	(311, 903, 61)	0.3	0.26	0.92	137	5	7	fca-3	epidermis	exp1	7			0.066087
0.29	220181	372	64	21	0.19	(363, 48, 26)	0.32	0.29	1	28	6	7	fca-3	epidermis	exp1	7			0.03
0.32	204760	367	187	24	0.19	(356, 193, 20)	0.35	0.32	0.95	34	6	7	fca-3	epidermis	exp1	7			0.0484211
0.37	192917	368	400	38	0.22	(361, 431, 29)	0.41	0.37	0.99	36	6	7	fca-3	epidermis	exp1	7			0.0441414
0.33	189494	368	296	27	0.2	(364, 278, 30)	0.36	0.32	1	39	6	7	fca-3	epidermis	exp1	7			0.04
0.36	141001	364	557	50	0.24	(372, 571, 42)	0.4	0.36	1	49	6	7	fca-3	epidermis	exp1	7			0.04
0.38	114301	366	487	41	0.21	(381, 498, 44)	0.41	0.37	1	71	6	7	fca-3	epidermis	exp1	7			0.04
0.36	68773	365	609	54	0.23	(357, 610, 46)	0.39	0.36	1	120	6	7	fca-3	epidermis	exp1	7			0.03
0.33	64648	366	780	79	0.25	(374, 777, 70)	0.38	0.33	0.96	127	6	7	fca-3	epidermis	exp1	7			0.0658333
0.37	61534	361	645	56	0.27	(363, 647, 52)	0.43	0.36	1	135	6	7	fca-3	epidermis	exp1	7			0.07
0.33	58800	362	749	71	0.23	(376, 744, 64)	0.38	0.31	0.98	141	6	7	fca-3	epidermis	exp1	7			0.0777551
0.33	57596	367	845	88	0.23	(373, 844, 79)	0.37	0.32	0.99	146	6	7	fca-3	epidermis	exp1	7			0.0537374
0.37	57248	361	681	61	0.23	(356, 678, 53)	0.4	0.36	0.98	147	6	7	fca-3	epidermis	exp1	7			0.0481633
0.37	55158	361	713	64	0.23	(373, 711, 62)	0.38	0.36	0.99	152	6	7	fca-3	epidermis	exp1	7			0.0238384
0.34	54460	364	811	80	0.29	(373, 812, 76)	0.35	0.34	1	154	6	7	fca-3	epidermis	exp1	7			0.01
0.3	51943	365	882	92	0.22	(377, 879, 86)	0.31	0.29	0.96	164	6	7	fca-3	epidermis	exp1	7			0.0329167
0.32	284872	403	167	60	0.24	(394, 192, 55)	0.38	0.32	0.97	16	7	7	fca-3	epidermis	exp1	7			0.0717526
0.33	87415	400	692	102	0.22	(411, 689, 95)	0.38	0.33	0.98	94	7	7	fca-3	epidermis	exp1	7			0.0577551
0.31	81082	396	725	103	0.23	(384, 724, 89)	0.37	0.32	0.99	102	7	7	fca-3	epidermis	exp1	7			0.0537374
0.33	58498	398	758	108	0.21	(412, 762, 118)	0.38	0.32	0.6	142	7	7	fca-3	epidermis	exp1	7			0.313333
0.3	55845	395	835	113	0.22	(409, 838, 119)	0.3	0.3	0.52	149	7	7	fca-3	epidermis	exp1	7			0.276923
0.3	55660	397	798	113	0.22	(390, 790, 116)	0.3	0.31	0.74	150	7	7	fca-3	epidermis	exp1	7			0.0954054
0.29	49818	391	876	116	0.21	(389, 865, 103)	0.28	0.29	0.89	172	7	7	fca-3	epidermis	exp1	7			0.0246067
0.37	253266	403	312	67	0.25	(410, 265, 77)	0.47	0.36	0.96	3821	7	7	fca-3	epidermis	exp1	7			0.129583
0.35	131121	402	410	78	0.23	(397, 426, 64)	0.38	0.34	0.99	3823	7	7	fca-3	epidermis	exp1	7			0.0438384
0.35	109821	399	541	84	0.24	(408, 528, 81)	0.37	0.35	1	3829	7	7	fca-3	epidermis	exp1	7			0.02
0.35	150370	400	474	80	0.29	(412, 460, 75)	0.39	0.35	1	3832	7	7	fca-3	epidermis	exp1	7			0.04
0.36	110529	399	604	88	0.23	(415, 607, 99)	0.41	0.36	0.99	3834	7	7	fca-3	epidermis	exp1	7			0.0541414
0.38	80986	395	656	90	0.27	(413, 656, 98)	0.47	0.37	0.98	3836	7	7	fca-3	epidermis	exp1	7			0.109592
0.33	137476	273	499	62	0.24	(269, 500, 56)	0.41	0.32	1	12	8	7	fca-3	cortex	exp1	7			0.09
0.31	229666	270	130	38	0.22	(268, 131, 32)	0.77	0.29	1	27	8	7	fca-3	cortex	exp1	7			0.48
0.4	182262	270	268	48	0.22	(269, 272, 45)	1	0.36	1	42	8	7	fca-3	cortex	exp1	7			0.64
0.72	117876	273	583	66	0.29	(273, 584, 68)	2.35	0.57	1	67	8	7	fca-3	cortex	exp1	7			1.78
0.33	112097	273	543	64	0.23	(258, 536, 51)	0.36	0.33	0.99	74	8	7	fca-3	cortex	exp1	7			0.0336364
0.34	313606	270	207	50	0.24	(274, 208, 43)	0.97	0.32	1	3802	8	7	fca-3	cortex	exp1	7			0.65
0.3	284044	267	326	52	0.24	(267, 307, 30)	0.4	0.29	0.98	3803	8	7	fca-3	cortex	exp1	7			0.118163
0.29	198450	267	391	57	0.23	(265, 385, 41)	0.38	0.29	0.99	3804	8	7	fca-3	cortex	exp1	7			0.0938384
0.35	157369	267	451	59	0.24	(268, 450, 57)	0.56	0.33	1	3851	8	7	fca-3	cortex	exp1	7			0.23
0.25	407758	351	280	82	0.23	(328, 252, 45)	0.38	0.26	0.99	10	9	7	fca-3	cortex	exp1	7			0.123838
0.31	266206	347	439	92	0.22	(338, 433, 88)	0.37	0.31	1	20	9	7	fca-3	cortex	exp1	7			0.06
0.26	192671	347	344	85	0.23	(327, 346, 54)	0.31	0.27	0.97	37	9	7	fca-3	cortex	exp1	7			0.0495876
0.27	190668	349	386	91	0.23	(348, 390, 87)	0.32	0.27	1	38	9	7	fca-3	cortex	exp1	7			0.05
0.26	138991	344	519	95	0.22	(332, 518, 71)	0.29	0.26	0.99	52	9	7	fca-3	cortex	exp1	7			0.0329293
0.31	105191	336	635	106	0.22	(318, 631, 119)	0.44	0.29	0.53	80	9	7	fca-3	cortex	exp1	7			0.540189
0.27	103266	341	604	101	0.23	(320, 605, 115)	0.29	0.27	0.7	83	9	7	fca-3	cortex	exp1	7			0.144286
0.26	102381	341	576	101	0.23	(326, 572, 78)	0.28	0.26	0.96	85	9	7	fca-3	cortex	exp1	7			0.0316667
0.27	116641	338	548	104	0.23	(315, 545, 112)	0.34	0.26	0.93	109	9	7	fca-3	cortex	exp1	7			0.105591
0.24	72823	345	660	104	0.23	(321, 659, 93)	0.27	0.25	0.95	113	9	7	fca-3	cortex	exp1	7			0.0342105
0.26	69113	338	713	107	0.26	(329, 712, 89)	0.29	0.27	0.93	119	9	7	fca-3	cortex	exp1	7			0.041828
0.24	63772	345	687	105	0.22	(335, 684, 88)	0.27	0.24	0.93	129	9	7	fca-3	cortex	exp1	7			0.0503226
0.26	60169	339	736	109	0.21	(325, 734, 98)	0.27	0.27	0.9	139	9	7	fca-3	cortex	exp1	7			0.03
0.26	52572	338	759	111	0.22	(323, 758, 105)	0.27	0.26	0.92	163	9	7	fca-3	cortex	exp1	7			0.0334783
0.33	43727	340	806	113	0.22	(349, 806, 119)	0.34	0.32	0.49	182	9	7	fca-3	cortex	exp1	7			0.373878
0.26	36208	339	782	114	0.23	(327, 781, 106)	0.23	0.26	0.81	200	9	7	fca-3	cortex	exp1	7			0.0239506
0.31	34353	338	830	115	0.21	(345, 831, 119)	0.32	0.31	0.51	205	9	7	fca-3	cortex	exp1	7			0.317451
0.25	143642	342	490	97	0.27	(353, 485, 70)	0.3	0.26	0.98	3844	9	7	fca-3	cortex	exp1	7			0.0461224
0.39	250207	129	240	105	0.22	(133, 248, 109)	0.94	0.38	1	3807	10	7	fca-3	epidermis	exp1	7			0.56
0.35	170388	131	319	107	0.26	(134, 323, 113)	0.58	0.34	0.91	3809	10	7	fca-3	epidermis	exp1	7			0.297363
0.44	168041	130	388	108	0.21	(134, 391, 116)	1.05	0.41	0.75	3810	10	7	fca-3	epidermis	exp1	7			0.99
0.48	116641	131	452	111	0.22	(136, 456, 119)	0.98	0.45	0.54	3813	10	7	fca-3	epidermis	exp1	7			1.36481
0.63	85340	133	507	113	0.22	(135, 509, 119)	1.45	0.55	0.54	3814	10	7	fca-3	epidermis	exp1	7			2.13519
0.33	94161	135	556	111	0.22	(135, 559, 103)	0.4	0.33	1	3816	10	7	fca-3	epidermis	exp1	7			0.07
0.4	88021	139	603	112	0.21	(142, 608, 119)	0.59	0.38	0.54	3817	10	7	fca-3	epidermis	exp1	7			0.712593
0.32	354663	122	142	98	0.22	(134, 144, 108)	0.91	0.3	1	3847	10	7	fca-3	epidermis	exp1	7			0.61
0.4	343301	192	302	82	0.23	(192, 304, 79)	1.53	0.38	1	13	11	7	fca-3	cortex	exp1	7			1.15
0.38	289479	191	375	86	0.24	(190, 370, 85)	1.17	0.37	1	15	11	7	fca-3	cortex	exp1	7			0.8
0.4	231738	193	443	89	0.23	(192, 446, 91)	0.97	0.39	1	26	11	7	fca-3	cortex	exp1	7			0.58
0.38	220167	195	503	92	0.22	(196, 505, 96)	0.73	0.38	1	29	11	7	fca-3	cortex	exp1	7			0.35
0.27	123948	203	580	100	0.28	(183, 576, 88)	0.34	0.28	0.97	60	11	7	fca-3	cortex	exp1	7			0.0705155
0.33	92766	202	608	97	0.27	(209, 611, 77)	0.49	0.31	0.82	89	11	7	fca-3	cortex	exp1	7			0.287561
0.33	80512	203	639	101	0.23	(218, 636, 84)	0.41	0.33	0.95	103	11	7	fca-3	cortex	exp1	7			0.101579
0.32	72393	211	696	108	0.21	(200, 696, 99)	0.36	0.33	0.94	114	11	7	fca-3	cortex	exp1	7			0.0529787
0.39	66848	203	671	106	0.22	(206, 671, 105)	0.52	0.39	0.98	122	11	7	fca-3	cortex	exp1	7			0.140612
0.3	52677	210	754	112	0.21	(219, 754, 105)	0.31	0.3	0.91	162	11	7	fca-3	cortex	exp1	7			0.0406593
0.34	50519	209	782	114	0.23	(206, 783, 119)	0.43	0.33	0.54	168	11	7	fca-3	cortex	exp1	7			0.466296
0.34	49492	205	725	110	0.23	(206, 727, 114)	0.39	0.33	0.86	173	11	7	fca-3	cortex	exp1	7			0.123488
0.32	524606	189	138	80	0.29	(188, 134, 53)	1.62	0.31	1	3845	11	7	fca-3	cortex	exp1	7			1.31
0.3	407286	189	224	81	0.23	(188, 220, 75)	0.92	0.29	1	3846	11	7	fca-3	cortex	exp1	7			0.63
0.26	118389	202	551	100	0.28	(195, 547, 80)	0.3	0.27	0.95	3848	11	7	fca-3	cortex	exp1	7			0.0457895
0.42	207396	136	250	71	0.27	(134, 249, 73)	0.64	0.41	1	32	1	8	fca-3	epidermis	exp1	7			0.23
0.29	195501	111	734	97	0.32	(86, 735, 123)	0.5	0.28	0.54	35	1	8	fca-3	epidermis	exp1	7			0.645926
0.42	175159	134	319	73	0.28	(135, 326, 76)	0.64	0.41	1	40	1	8	fca-3	epidermis	exp1	7			0.23
0.47	150278	131	426	74	0.28	(134, 430, 74)	0.73	0.45	1	48	1	8	fca-3	epidermis	exp1	7			0.28
0.35	149564	128	655	86	0.27	(133, 650, 81)	0.42	0.35	1	49	1	8	fca-3	epidermis	exp1	7			0.07
0.5	149298	129	609	90	0.28	(130, 613, 89)	0.93	0.49	1	50	1	8	fca-3	epidermis	exp1	7			0.44
0.51	144388	129	524	81	0.28	(132, 527, 79)	0.9	0.48	1	53	1	8	fca-3	epidermis	exp1	7			0.42
0.4	141258	133	374	73	0.28	(126, 360, 60)	0.46	0.4	0.99	54	1	8	fca-3	epidermis	exp1	7			0.0646465
0.42	139298	130	476	77	0.29	(126, 476, 75)	0.47	0.41	1	56	1	8	fca-3	epidermis	exp1	7			0.06
0.44	114127	126	567	84	0.28	(129, 569, 84)	0.59	0.42	1	66	1	8	fca-3	epidermis	exp1	7			0.17
0.29	100953	126	694	95	0.27	(126, 695, 100)	0.34	0.29	1	79	1	8	fca-3	epidermis	exp1	7			0.05
0.33	281193	122	69	81	0.28	(107, 89, 83)	0.41	0.32	0.97	4140	1	8	fca-3	epidermis	exp1	7			0.10268
0.39	258388	135	173	69	0.27	(138, 174, 75)	0.55	0.39	1	4141	1	8	fca-3	epidermis	exp1	7			0.16
0.41	48974	118	783	96	0.27	(122, 786, 82)	0.46	0.39	0.88	168	1	8	fca-3	epidermis	exp1	7			0.132727
0.37	45204	119	765	97	0.32	(121, 765, 92)	0.37	0.35	0.8	177	1	8	fca-3	epidermis	exp1	7			0.1125
0.34	234604	173	136	30	0.23	(181, 139, 46)	0.44	0.34	0.99	22	2	8	fca-3	epidermis	exp1	7			0.104444
0.51	110778	173	307	33	0.25	(177, 309, 40)	1.12	0.46	1	68	2	8	fca-3	epidermis	exp1	7			0.66
0.47	110639	174	238	31	0.23	(178, 236, 40)	1.08	0.42	1	69	2	8	fca-3	epidermis	exp1	7			0.66
0.5	100668	172	375	38	0.24	(172, 373, 41)	0.69	0.48	1	80	2	8	fca-3	epidermis	exp1	7			0.21
0.65	86853	170	487	40	0.25	(174, 490, 42)	1.24	0.58	1	98	2	8	fca-3	epidermis	exp1	7			0.66
0.51	86408	173	431	38	0.24	(175, 436, 39)	0.71	0.49	1	101	2	8	fca-3	epidermis	exp1	7			0.22
0.6	85697	168	547	45	0.25	(170, 550, 48)	1.14	0.53	1	103	2	8	fca-3	epidermis	exp1	7			0.61
0.6	83795	169	603	47	0.25	(169, 609, 51)	1.11	0.53	1	106	2	8	fca-3	epidermis	exp1	7			0.58
0.45	67398	167	655	51	0.25	(171, 659, 55)	0.62	0.42	1	135	2	8	fca-3	epidermis	exp1	7			0.2
0.5	216450	217	162	24	0.22	(215, 160, 19)	1.27	0.47	1	30	3	8	fca-3	epidermis	exp1	7			0.8
0.39	179394	216	256	27	0.22	(207, 247, 44)	0.45	0.39	0.98	39	3	8	fca-3	epidermis	exp1	7			0.0691837
0.57	154747	218	331	26	0.23	(218, 335, 33)	1.1	0.53	1	47	3	8	fca-3	epidermis	exp1	7			0.57
0.47	148393	214	512	36	0.29	(212, 511, 40)	0.63	0.45	1	51	3	8	fca-3	epidermis	exp1	7			0.18
0.42	131894	214	565	40	0.25	(231, 563, 48)	0.47	0.41	0.99	59	3	8	fca-3	epidermis	exp1	7			0.0647475
0.42	129509	215	456	31	0.23	(209, 459, 18)	0.45	0.41	1	60	3	8	fca-3	epidermis	exp1	7			0.04
0.49	129492	215	399	31	0.23	(217, 398, 25)	0.66	0.48	1	61	3	8	fca-3	epidermis	exp1	7			0.18
0.42	72447	214	607	43	0.25	(211, 608, 43)	0.52	0.4	0.99	124	3	8	fca-3	epidermis	exp1	7			0.125253
0.48	67706	210	718	49	0.26	(208, 720, 53)	0.72	0.44	0.99	134	3	8	fca-3	epidermis	exp1	7			0.287273
0.46	64822	207	688	50	0.26	(210, 692, 54)	0.61	0.43	0.98	139	3	8	fca-3	epidermis	exp1	7			0.192449
0.42	64311	211	662	47	0.25	(212, 664, 51)	0.55	0.39	0.96	142	3	8	fca-3	epidermis	exp1	7			0.182917
0.41	63643	212	635	42	0.26	(211, 634, 39)	0.44	0.4	0.96	143	3	8	fca-3	epidermis	exp1	7			0.0583333
0.34	57432	205	745	53	0.3	(210, 744, 34)	0.36	0.33	0.94	155	3	8	fca-3	epidermis	exp1	7			0.0529787
0.76	96822	256	478	17	0.21	(256, 482, 21)	2.06	0.61	1	86	4	8	fca-3	epidermis	exp1	7			1.45
0.85	95125	255	396	14	0.2	(255, 400, 15)	2.57	0.65	1	87	4	8	fca-3	epidermis	exp1	7			1.92
0.76	94494	249	680	33	0.25	(249, 680, 33)	2	0.62	1	88	4	8	fca-3	epidermis	exp1	7			1.38
0.62	81596	258	550	22	0.26	(255, 554, 24)	1.13	0.55	0.99	109	4	8	fca-3	epidermis	exp1	7			0.591414
0.64	41879	240	808	47	0.25	(240, 806, 51)	0.86	0.58	0.99	4144	4	8	fca-3	epidermis	exp1	7			0.288687
0.8	76001	259	304	12	0.23	(258, 305, 12)	2.25	0.59	1	118	4	8	fca-3	epidermis	exp1	7			1.66
0.57	74566	254	609	24	0.22	(253, 612, 26)	0.95	0.51	0.99	119	4	8	fca-3	epidermis	exp1	7			0.449596
0.67	35256	240	840	50	0.26	(240, 842, 54)	0.84	0.59	0.96	4145	4	8	fca-3	epidermis	exp1	7			0.285
0.48	44957	243	772	44	0.25	(242, 772, 40)	0.6	0.45	1	179	4	8	fca-3	epidermis	exp1	7			0.15
0.48	39628	247	736	36	0.29	(247, 736, 40)	0.6	0.43	0.99	184	4	8	fca-3	epidermis	exp1	7			0.176061
0.6	112845	295	584	29	0.27	(294, 589, 33)	1.47	0.52	1	67	5	8	fca-3	epidermis	exp1	7			0.95
0.43	108832	294	520	25	0.23	(303, 533, 20)	0.46	0.43	1	71	5	8	fca-3	epidermis	exp1	7			0.03
0.61	106278	289	645	31	0.23	(290, 648, 40)	1.39	0.54	1	73	5	8	fca-3	epidermis	exp1	7			0.85
0.44	103221	295	457	18	0.22	(293, 462, 27)	0.63	0.42	1	78	5	8	fca-3	epidermis	exp1	7			0.21
0.44	97018	295	389	17	0.21	(291, 396, 19)	0.68	0.42	1	85	5	8	fca-3	epidermis	exp1	7			0.26
0.56	94475	300	245	13	0.2	(297, 246, 15)	1.53	0.44	0.96	90	5	8	fca-3	epidermis	exp1	7			1.15375
0.41	92119	284	703	39	0.29	(288, 713, 26)	0.46	0.41	0.97	91	5	8	fca-3	epidermis	exp1	7			0.0642268
0.38	90342	298	323	14	0.2	(292, 330, 17)	0.52	0.36	0.99	94	5	8	fca-3	epidermis	exp1	7			0.165253
0.39	85064	282	752	44	0.25	(291, 741, 33)	0.46	0.38	0.99	104	5	8	fca-3	epidermis	exp1	7			0.0846465
0.44	345916	338	68	30	0.23	(336, 72, 29)	1.23	0.42	1	11	6	8	fca-3	epidermis	exp1	7			0.81
0.32	311103	337	195	31	0.23	(353, 203, 28)	0.39	0.32	1	12	6	8	fca-3	epidermis	exp1	7			0.07
0.43	286275	336	308	34	0.23	(335, 312, 31)	0.76	0.42	1	15	6	8	fca-3	epidermis	exp1	7			0.34
0.4	200451	330	499	50	0.26	(335, 500, 45)	0.52	0.4	1	34	6	8	fca-3	epidermis	exp1	7			0.12
0.51	141037	329	438	43	0.25	(329, 441, 44)	0.93	0.48	1	55	6	8	fca-3	epidermis	exp1	7			0.45
0.6	127105	332	387	39	0.29	(329, 390, 43)	1.35	0.53	1	62	6	8	fca-3	epidermis	exp1	7			0.82
0.48	100303	328	584	57	0.27	(326, 588, 55)	0.81	0.44	1	81	6	8	fca-3	epidermis	exp1	7			0.37
0.31	94485	314	729	68	0.26	(324, 725, 48)	0.35	0.3	0.99	89	6	8	fca-3	epidermis	exp1	7			0.0535354
0.43	91678	327	549	53	0.3	(328, 553, 58)	0.63	0.41	0.99	92	6	8	fca-3	epidermis	exp1	7			0.226364
0.48	90275	325	624	58	0.26	(323, 626, 62)	0.76	0.44	1	95	6	8	fca-3	epidermis	exp1	7			0.32
0.37	89732	319	694	62	0.26	(324, 693, 58)	0.43	0.36	1	96	6	8	fca-3	epidermis	exp1	7			0.07
0.66	78543	314	764	72	0.26	(311, 764, 72)	1.39	0.56	0.99	113	6	8	fca-3	epidermis	exp1	7			0.84404
0.45	92275	325	658	59	0.27	(323, 662, 65)	0.63	0.43	1	4147	6	8	fca-3	epidermis	exp1	7			0.2
0.41	80560	308	794	71	0.27	(307, 793, 74)	0.66	0.37	0.99	4149	6	8	fca-3	epidermis	exp1	7			0.296667
0.32	291246	381	281	63	0.31	(378, 311, 43)	0.37	0.31	0.96	14	7	8	fca-3	epidermis	exp1	7			0.0754167
0.31	276350	381	166	58	0.26	(366, 172, 59)	0.5	0.31	1	16	7	8	fca-3	epidermis	exp1	7			0.19
0.36	222034	374	384	64	0.27	(385, 371, 79)	0.42	0.35	0.98	4152	7	8	fca-3	epidermis	exp1	7			0.0785714
0.33	176703	369	467	74	0.28	(373, 441, 54)	0.36	0.33	0.97	4154	7	8	fca-3	epidermis	exp1	7			0.041134
0.34	150042	368	545	81	0.28	(382, 551, 90)	0.38	0.34	0.99	4156	7	8	fca-3	epidermis	exp1	7			0.0438384
0.45	162997	361	622	85	0.27	(358, 621, 90)	0.74	0.43	1	4160	7	8	fca-3	epidermis	exp1	7			0.31
0.35	124107	354	701	88	0.27	(368, 681, 97)	0.45	0.34	0.98	4161	7	8	fca-3	epidermis	exp1	7			0.119184
0.24	455438	269	109	56	0.27	(286, 69, 38)	0.32	0.24	0.97	4119	8	8	fca-3	cortex	exp1	7			0.0898969
0.27	420309	266	198	57	0.27	(261, 211, 36)	0.46	0.27	0.95	4122	8	8	fca-3	cortex	exp1	7			0.214211
0.39	307323	268	276	59	0.27	(273, 279, 59)	1.2	0.36	1	4124	8	8	fca-3	cortex	exp1	7			0.84
0.4	246740	264	340	63	0.31	(265, 339, 57)	1	0.37	1	4127	8	8	fca-3	cortex	exp1	7			0.63
0.38	240753	263	399	63	0.31	(261, 404, 59)	0.75	0.37	1	4132	8	8	fca-3	cortex	exp1	7			0.38
0.43	219409	257	458	66	0.27	(263, 459, 70)	0.98	0.4	1	4134	8	8	fca-3	cortex	exp1	7			0.58
0.41	173869	252	691	91	0.29	(250, 683, 118)	0.62	0.4	0.83	41	8	8	fca-3	cortex	exp1	7			0.346988
0.47	136527	258	509	69	0.27	(260, 512, 72)	1.09	0.42	1	4135	8	8	fca-3	cortex	exp1	7			0.67
0.4	133857	258	553	70	0.31	(258, 555, 76)	0.64	0.38	1	4136	8	8	fca-3	cortex	exp1	7			0.26
0.47	125226	258	598	71	0.27	(256, 598, 77)	0.93	0.43	1	4137	8	8	fca-3	cortex	exp1	7			0.5
0.48	128949	254	643	72	0.26	(256, 645, 81)	0.95	0.44	1	4138	8	8	fca-3	cortex	exp1	7			0.51
0.33	144412	249	725	102	0.26	(257, 730, 82)	0.41	0.32	0.97	52	8	8	fca-3	cortex	exp1	7			0.10268
0.31	109917	246	755	98	0.28	(251, 758, 88)	0.44	0.31	0.94	70	8	8	fca-3	cortex	exp1	7			0.158085
0.42	84716	245	779	105	0.27	(247, 779, 92)	0.65	0.39	0.73	105	8	8	fca-3	cortex	exp1	7			0.500411
0.4	74582	187	551	84	0.28	(185, 556, 89)	0.49	0.38	1	23	9	8	fca-3	cortex	exp1	7			0.11
0.44	229863	172	298	93	0.28	(191, 311, 84)	1.55	0.41	1	25	9	8	fca-3	cortex	exp1	7			1.14
0.32	176368	193	188	74	0.28	(189, 188, 69)	0.56	0.3	1	4121	9	8	fca-3	cortex	exp1	7			0.26
0.43	224768	171	351	95	0.27	(193, 359, 83)	1.3	0.41	1	28	9	8	fca-3	cortex	exp1	7			0.89
0.48	166460	194	250	77	0.29	(190, 248, 81)	1.75	0.41	1	4123	9	8	fca-3	cortex	exp1	7			1.34
0.59	117020	191	403	79	0.27	(187, 402, 83)	1.56	0.5	1	4133	9	8	fca-3	cortex	exp1	7			1.06
0.45	44821	182	635	91	0.29	(181, 635, 94)	0.59	0.4	0.86	46	9	8	fca-3	cortex	exp1	7			0.286047
0.49	136750	182	454	85	0.27	(182, 455, 84)	1.17	0.44	1	57	9	8	fca-3	cortex	exp1	7			0.73
0.62	132188	182	503	84	0.28	(185, 506, 84)	1.75	0.53	1	58	9	8	fca-3	cortex	exp1	7			1.22
0.42	91244	186	655	103	0.27	(181, 658, 94)	0.6	0.39	0.89	93	9	8	fca-3	cortex	exp1	7			0.284157
0.39	188329	191	129	78	0.27	(191, 135, 76)	1.29	0.34	1	4139	9	8	fca-3	cortex	exp1	7			0.95
0.34	61802	177	608	90	0.28	(177, 609, 78)	0.37	0.33	0.95	146	9	8	fca-3	cortex	exp1	7			0.0594737
0.36	61675	180	584	89	0.27	(184, 584, 84)	0.41	0.35	0.93	147	9	8	fca-3	cortex	exp1	7			0.0908602
0.37	54103	176	681	98	0.28	(177, 681, 97)	0.49	0.34	0.94	162	9	8	fca-3	cortex	exp1	7			0.181277
0.37	134227	126	330	73	0.28	(115, 340, 79)	0.4	0.37	1	30	1	9	fca-3	epidermis	exp1	7			0.03
0.29	193452	132	46	57	0.23	(149, 30, 54)	0.36	0.29	0.97	31	1	9	fca-3	epidermis	exp1	7			0.081134
0.32	180054	126	156	63	0.27	(126, 172, 79)	0.34	0.32	0.94	37	1	9	fca-3	epidermis	exp1	7			0.0417021
0.59	157230	132	541	89	0.23	(139, 546, 89)	1.37	0.54	0.99	47	1	9	fca-3	epidermis	exp1	7			0.843838
0.45	135268	137	609	88	0.23	(148, 615, 83)	0.6	0.46	1	60	1	9	fca-3	epidermis	exp1	7			0.14
0.57	124906	147	716	93	0.24	(150, 724, 94)	1.5	0.51	1	70	1	9	fca-3	epidermis	exp1	7			0.99
0.47	122392	145	667	87	0.25	(151, 668, 88)	0.8	0.45	1	74	1	9	fca-3	epidermis	exp1	7			0.35
0.55	99662	151	764	97	0.28	(154, 767, 100)	1.29	0.46	1	87	1	9	fca-3	epidermis	exp1	7			0.83
0.41	57592	153	803	100	0.24	(154, 802, 101)	0.48	0.4	0.97	136	1	9	fca-3	epidermis	exp1	7			0.0948454
0.43	50694	158	859	102	0.22	(154, 860, 105)	0.71	0.36	0.8	149	1	9	fca-3	epidermis	exp1	7			0.5275
0.42	44617	155	831	102	0.22	(149, 834, 108)	0.5	0.41	0.59	163	1	9	fca-3	epidermis	exp1	7			0.437458
0.38	41709	162	888	102	0.22	(161, 890, 109)	0.52	0.35	0.53	173	1	9	fca-3	epidermis	exp1	7			0.631132
0.49	30781	163	914	104	0.24	(162, 915, 109)	0.61	0.43	0.47	196	1	9	fca-3	epidermis	exp1	7			0.867872
0.48	30616	168	937	105	0.22	(169, 939, 109)	0.59	0.42	0.49	199	1	9	fca-3	epidermis	exp1	7			0.784082
0.35	159901	126	249	67	0.24	(138, 238, 53)	0.41	0.35	1	3385	1	9	fca-3	epidermis	exp1	7			0.06
0.43	130661	128	401	75	0.23	(132, 404, 80)	0.52	0.42	1	3387	1	9	fca-3	epidermis	exp1	7			0.1
0.52	161868	128	474	88	0.23	(137, 475, 87)	0.93	0.49	1	3388	1	9	fca-3	epidermis	exp1	7			0.44
0.42	345679	163	142	28	0.18	(169, 154, 39)	1.45	0.39	1	11	2	9	fca-3	epidermis	exp1	7			1.06
0.37	160181	160	275	35	0.2	(169, 285, 46)	0.44	0.37	1	46	2	9	fca-3	epidermis	exp1	7			0.07
0.45	134216	159	351	41	0.2	(166, 356, 48)	0.76	0.42	1	61	2	9	fca-3	epidermis	exp1	7			0.34
0.7	125561	199	702	69	0.24	(199, 705, 67)	1.61	0.62	1	69	2	9	fca-3	epidermis	exp1	7			0.99
0.59	117486	162	425	44	0.2	(166, 428, 53)	1.31	0.52	1	78	2	9	fca-3	epidermis	exp1	7			0.79
0.82	113661	198	656	60	0.23	(199, 657, 62)	1.98	0.71	1	80	2	9	fca-3	epidermis	exp1	7			1.27
0.59	102116	163	486	48	0.2	(168, 491, 52)	1.22	0.52	1	86	2	9	fca-3	epidermis	exp1	7			0.7
0.46	94414	166	543	53	0.23	(157, 542, 50)	0.52	0.45	1	92	2	9	fca-3	epidermis	exp1	7			0.07
0.5	87406	170	597	58	0.22	(173, 596, 64)	0.82	0.46	1	97	2	9	fca-3	epidermis	exp1	7			0.36
0.55	59747	201	819	88	0.23	(202, 820, 83)	0.86	0.5	0.81	130	2	9	fca-3	epidermis	exp1	7			0.561728
0.49	55421	200	739	70	0.24	(200, 739, 72)	0.72	0.44	0.92	143	2	9	fca-3	epidermis	exp1	7			0.342609
0.49	48869	211	890	89	0.23	(214, 889, 82)	0.64	0.44	0.77	151	2	9	fca-3	epidermis	exp1	7			0.391169
0.48	46858	199	760	72	0.23	(201, 760, 75)	0.57	0.44	0.8	155	2	9	fca-3	epidermis	exp1	7			0.2725
0.49	44576	209	905	90	0.28	(209, 906, 92)	0.59	0.43	0.72	164	2	9	fca-3	epidermis	exp1	7			0.389444
0.6	44386	206	838	86	0.24	(207, 838, 88)	0.85	0.5	0.77	166	2	9	fca-3	epidermis	exp1	7			0.603896
0.52	44295	198	780	73	0.28	(202, 781, 78)	0.72	0.44	0.81	167	2	9	fca-3	epidermis	exp1	7			0.448889
0.43	48749	204	800	81	0.23	(205, 800, 81)	0.5	0.39	0.81	3389	2	9	fca-3	epidermis	exp1	7			0.227284
0.56	50262	207	856	86	0.24	(206, 855, 78)	0.64	0.54	0.78	3393	2	9	fca-3	epidermis	exp1	7			0.280513
0.53	46310	208	872	88	0.23	(207, 873, 92)	0.63	0.49	0.74	3394	2	9	fca-3	epidermis	exp1	7			0.361351
0.57	176454	203	387	34	0.18	(202, 393, 35)	1.1	0.54	1	38	3	9	fca-3	epidermis	exp1	7			0.56
0.44	175303	208	144	21	0.16	(209, 147, 26)	0.85	0.42	1	39	3	9	fca-3	epidermis	exp1	7			0.43
0.49	172199	205	229	25	0.17	(212, 233, 24)	1.06	0.46	1	41	3	9	fca-3	epidermis	exp1	7			0.6
0.51	153612	204	463	40	0.2	(205, 465, 39)	0.87	0.49	1	49	3	9	fca-3	epidermis	exp1	7			0.38
0.6	149313	207	532	45	0.21	(208, 536, 48)	1.19	0.55	1	51	3	9	fca-3	epidermis	exp1	7			0.64
0.43	149264	203	309	29	0.22	(203, 311, 26)	0.48	0.42	1	52	3	9	fca-3	epidermis	exp1	7			0.06
0.42	135286	208	598	50	0.22	(210, 597, 55)	0.5	0.41	1	59	3	9	fca-3	epidermis	exp1	7			0.09
0.45	151785	251	485	26	0.18	(252, 487, 33)	0.74	0.43	1	50	4	9	fca-3	epidermis	exp1	7			0.31
0.36	129801	254	182	12	0.18	(257, 174, 20)	0.48	0.35	0.98	65	4	9	fca-3	epidermis	exp1	7			0.139796
0.41	128501	251	614	32	0.19	(240, 603, 37)	0.44	0.41	0.99	67	4	9	fca-3	epidermis	exp1	7			0.0344444
0.41	126842	249	419	18	0.16	(230, 421, 11)	0.47	0.4	0.99	68	4	9	fca-3	epidermis	exp1	7			0.0747475
0.64	121859	247	676	40	0.2	(250, 680, 43)	1.55	0.56	1	75	4	9	fca-3	epidermis	exp1	7			0.99
0.44	119399	252	552	28	0.18	(252, 540, 30)	0.48	0.44	1	76	4	9	fca-3	epidermis	exp1	7			0.04
0.44	119096	248	735	46	0.25	(251, 737, 54)	0.71	0.41	1	77	4	9	fca-3	epidermis	exp1	7			0.3
0.38	110279	249	346	15	0.16	(248, 346, 18)	0.46	0.38	1	81	4	9	fca-3	epidermis	exp1	7			0.08
0.59	109368	245	790	54	0.21	(250, 796, 58)	1.43	0.51	1	82	4	9	fca-3	epidermis	exp1	7			0.92
0.58	105599	249	274	14	0.14	(251, 276, 16)	1.44	0.49	1	85	4	9	fca-3	epidermis	exp1	7			0.95
0.46	95879	251	836	61	0.22	(253, 836, 64)	0.74	0.43	1	91	4	9	fca-3	epidermis	exp1	7			0.31
0.45	86928	258	918	83	0.25	(260, 923, 76)	0.76	0.41	0.98	98	4	9	fca-3	epidermis	exp1	7			0.36551
0.52	60898	260	983	89	0.23	(259, 982, 83)	0.92	0.45	1	126	4	9	fca-3	epidermis	exp1	7			0.47
0.59	57933	259	951	80	0.28	(259, 953, 80)	1.09	0.49	0.99	135	4	9	fca-3	epidermis	exp1	7			0.61101
0.39	57573	255	883	66	0.24	(255, 888, 68)	0.5	0.37	0.99	137	4	9	fca-3	epidermis	exp1	7			0.135051
0.41	277773	303	280	29	0.22	(287, 243, 18)	0.48	0.41	0.99	19	5	9	fca-3	epidermis	exp1	7			0.0748485
0.32	208540	306	119	24	0.17	(315, 146, 14)	0.35	0.32	1	25	5	9	fca-3	epidermis	exp1	7			0.03
0.37	189129	304	194	28	0.18	(287, 188, 20)	0.41	0.37	1	34	5	9	fca-3	epidermis	exp1	7			0.04
0.37	154120	301	355	33	0.19	(290, 344, 12)	0.42	0.37	0.99	48	5	9	fca-3	epidermis	exp1	7			0.0542424
0.41	140022	302	451	43	0.21	(303, 456, 24)	0.49	0.41	1	56	5	9	fca-3	epidermis	exp1	7			0.08
0.39	137759	302	403	36	0.2	(307, 395, 20)	0.44	0.38	0.99	57	5	9	fca-3	epidermis	exp1	7			0.0644444
0.34	123770	301	583	49	0.22	(287, 577, 36)	0.38	0.34	0.98	71	5	9	fca-3	epidermis	exp1	7			0.0477551
0.39	123726	304	496	44	0.2	(304, 490, 25)	0.44	0.39	1	72	5	9	fca-3	epidermis	exp1	7			0.05
0.37	113825	302	541	45	0.21	(292, 533, 28)	0.42	0.36	1	79	5	9	fca-3	epidermis	exp1	7			0.06
0.35	106944	298	662	56	0.27	(292, 666, 37)	0.38	0.35	1	83	5	9	fca-3	epidermis	exp1	7			0.03
0.33	96714	300	698	60	0.23	(285, 699, 42)	0.38	0.33	0.99	89	5	9	fca-3	epidermis	exp1	7			0.0538384
0.34	92892	304	627	52	0.22	(314, 633, 41)	0.36	0.34	0.99	94	5	9	fca-3	epidermis	exp1	7			0.0236364
0.34	91119	298	759	65	0.22	(312, 760, 81)	0.39	0.33	1	95	5	9	fca-3	epidermis	exp1	7			0.06
0.3	79523	304	865	82	0.23	(321, 865, 75)	0.32	0.3	0.98	103	5	9	fca-3	epidermis	exp1	7			0.0265306
0.32	76866	300	786	71	0.23	(288, 787, 55)	0.35	0.32	0.96	105	5	9	fca-3	epidermis	exp1	7			0.0445833
0.3	74482	306	892	87	0.25	(322, 894, 77)	0.34	0.29	0.99	108	5	9	fca-3	epidermis	exp1	7			0.0534343
0.32	74257	300	728	62	0.23	(294, 729, 45)	0.39	0.31	1	109	5	9	fca-3	epidermis	exp1	7			0.08
0.31	72089	303	813	77	0.24	(312, 812, 61)	0.34	0.3	0.92	113	5	9	fca-3	epidermis	exp1	7			0.0695652
0.26	70307	308	973	96	0.23	(302, 973, 80)	0.3	0.26	0.98	116	5	9	fca-3	epidermis	exp1	7			0.0461224
0.31	66084	303	837	80	0.28	(312, 838, 68)	0.33	0.3	0.94	119	5	9	fca-3	epidermis	exp1	7			0.0510638
0.28	65738	307	919	90	0.28	(297, 920, 77)	0.3	0.28	0.95	121	5	9	fca-3	epidermis	exp1	7			0.0357895
0.25	59298	307	1003	100	0.24	(297, 1004, 90)	0.26	0.26	0.71	132	5	9	fca-3	epidermis	exp1	7			0.106197
0.27	59131	307	944	92	0.23	(322, 945, 85)	0.28	0.28	0.93	133	5	9	fca-3	epidermis	exp1	7			0.0210753
0.28	296411	357	99	38	0.19	(365, 76, 59)	0.33	0.28	0.97	15	6	9	fca-3	epidermis	exp1	7			0.0602062
0.31	229420	352	232	42	0.2	(352, 233, 61)	0.37	0.31	0.98	22	6	9	fca-3	epidermis	exp1	7			0.067551
0.33	215624	353	343	47	0.21	(360, 329, 64)	0.38	0.32	0.98	24	6	9	fca-3	epidermis	exp1	7			0.0677551
0.36	206988	353	446	57	0.23	(365, 475, 56)	0.4	0.36	0.99	26	6	9	fca-3	epidermis	exp1	7			0.0440404
0.37	143800	352	598	67	0.24	(353, 618, 57)	0.4	0.37	0.99	54	6	9	fca-3	epidermis	exp1	7			0.0340404
0.37	137212	353	530	61	0.22	(345, 511, 50)	0.41	0.37	0.99	58	6	9	fca-3	epidermis	exp1	7			0.0441414
0.35	84776	358	790	93	0.24	(359, 788, 80)	0.38	0.35	1	99	6	9	fca-3	epidermis	exp1	7			0.03
0.33	74983	356	821	97	0.28	(367, 818, 97)	0.36	0.33	1	107	6	9	fca-3	epidermis	exp1	7			0.03
0.35	73228	351	651	71	0.23	(347, 650, 68)	0.39	0.34	1	110	6	9	fca-3	epidermis	exp1	7			0.05
0.34	60128	351	851	97	0.28	(361, 854, 91)	0.36	0.34	1	127	6	9	fca-3	epidermis	exp1	7			0.02
0.37	59939	349	723	77	0.24	(360, 722, 83)	0.4	0.36	0.99	129	6	9	fca-3	epidermis	exp1	7			0.0440404
0.36	59128	349	755	82	0.23	(361, 756, 81)	0.39	0.35	0.99	134	6	9	fca-3	epidermis	exp1	7			0.0439394
0.33	56877	354	884	101	0.23	(365, 888, 101)	0.36	0.33	0.98	139	6	9	fca-3	epidermis	exp1	7			0.0373469
0.3	45581	353	918	103	0.23	(366, 917, 108)	0.31	0.29	0.59	161	6	9	fca-3	epidermis	exp1	7			0.235424
0.29	34014	353	951	106	0.22	(363, 948, 109)	0.31	0.29	0.52	189	6	9	fca-3	epidermis	exp1	7			0.306154
0.31	25953	352	987	109	0.21	(358, 983, 109)	0.32	0.29	0.49	215	6	9	fca-3	epidermis	exp1	7			0.363061
0.36	67569	349	688	74	0.24	(344, 688, 62)	0.41	0.35	1	3425	6	9	fca-3	epidermis	exp1	7			0.06
0.31	335106	388	208	86	0.24	(396, 277, 109)	0.38	0.31	0.52	12	7	9	fca-3	epidermis	exp1	7			0.420769
0.35	256248	388	353	88	0.23	(392, 367, 109)	0.42	0.35	0.54	21	7	9	fca-3	epidermis	exp1	7			0.427778
0.26	226208	392	61	79	0.24	(381, 100, 67)	0.3	0.25	0.91	23	7	9	fca-3	epidermis	exp1	7			0.0796703
0.35	132296	386	514	99	0.22	(381, 496, 84)	0.39	0.35	0.97	63	7	9	fca-3	epidermis	exp1	7			0.0520619
0.34	128991	387	447	96	0.23	(385, 454, 85)	0.36	0.34	1	66	7	9	fca-3	epidermis	exp1	7			0.02
0.35	98008	384	578	101	0.23	(397, 565, 102)	0.38	0.35	0.95	88	7	9	fca-3	epidermis	exp1	7			0.05
0.34	93001	382	641	103	0.23	(383, 657, 96)	0.38	0.34	0.98	93	7	9	fca-3	epidermis	exp1	7			0.0477551
0.37	61415	380	692	103	0.23	(392, 689, 105)	0.42	0.37	0.81	125	7	9	fca-3	epidermis	exp1	7			0.148519
0.33	40281	383	729	106	0.22	(397, 727, 109)	0.35	0.33	0.51	176	7	9	fca-3	epidermis	exp1	7			0.356275
0.35	30742	380	761	108	0.22	(378, 763, 105)	0.36	0.36	0.8	197	7	9	fca-3	epidermis	exp1	7			0.09
0.24	623767	186	71	84	0.24	(182, 65, 93)	0.6	0.24	1	6	8	9	fca-3	cortex	exp1	7			0.36
0.34	437316	180	173	87	0.25	(172, 175, 69)	1.51	0.33	1	8	8	9	fca-3	cortex	exp1	7			1.18
0.31	365188	179	265	88	0.23	(173, 257, 88)	0.82	0.31	1	9	8	9	fca-3	cortex	exp1	7			0.51
0.41	286161	181	341	90	0.28	(177, 343, 93)	1.36	0.39	1	16	8	9	fca-3	cortex	exp1	7			0.97
0.39	278379	184	412	96	0.23	(171, 409, 99)	1.12	0.39	1	18	8	9	fca-3	cortex	exp1	7			0.73
0.4	190594	185	481	96	0.23	(174, 487, 108)	0.88	0.38	0.61	33	8	9	fca-3	cortex	exp1	7			1.06262
0.39	167889	186	540	100	0.24	(180, 542, 109)	0.67	0.39	0.54	43	8	9	fca-3	cortex	exp1	7			0.850741
0.31	70466	187	586	101	0.23	(179, 588, 94)	0.33	0.32	0.95	115	8	9	fca-3	cortex	exp1	7			0.0273684
0.35	69384	193	644	101	0.23	(199, 647, 95)	0.4	0.36	0.96	117	8	9	fca-3	cortex	exp1	7			0.0566667
0.31	66058	188	615	102	0.22	(178, 614, 96)	0.36	0.31	0.98	120	8	9	fca-3	cortex	exp1	7			0.0573469
0.36	52237	195	676	105	0.22	(208, 673, 97)	0.39	0.37	0.91	147	8	9	fca-3	cortex	exp1	7			0.0585714
0.35	138498	260	539	74	0.24	(261, 541, 68)	0.42	0.34	1	36	9	9	fca-3	cortex	exp1	7			0.08
0.34	88933	255	661	89	0.23	(259, 661, 91)	0.39	0.34	0.96	96	9	9	fca-3	cortex	exp1	7			0.06625
0.33	80069	257	687	94	0.24	(248, 686, 78)	0.41	0.33	0.93	102	9	9	fca-3	cortex	exp1	7			0.11086
0.3	72959	258	713	95	0.22	(281, 715, 95)	0.31	0.3	0.98	111	9	9	fca-3	cortex	exp1	7			0.0163265
0.29	71151	256	760	98	0.22	(247, 759, 86)	0.32	0.29	0.92	114	9	9	fca-3	cortex	exp1	7			0.0578261
0.31	66390	258	736	96	0.23	(260, 737, 84)	0.3	0.31	0.82	118	9	9	fca-3	cortex	exp1	7			0.0558537
0.32	56061	259	805	102	0.22	(252, 806, 91)	0.37	0.32	0.91	141	9	9	fca-3	cortex	exp1	7			0.0865934
0.45	52959	259	851	104	0.24	(264, 851, 108)	0.71	0.4	0.6	146	9	9	fca-3	cortex	exp1	7			0.783333
0.28	46287	256	781	100	0.24	(240, 781, 92)	0.26	0.29	0.85	158	9	9	fca-3	cortex	exp1	7			0.0158824
0.29	38141	260	825	105	0.22	(273, 826, 109)	0.25	0.3	0.42	183	9	9	fca-3	cortex	exp1	7			0.295238
0.43	35985	256	876	105	0.22	(263, 877, 109)	0.58	0.37	0.45	185	9	9	fca-3	cortex	exp1	7			0.918889
0.26	315551	255	90	54	0.21	(255, 89, 64)	0.36	0.25	1	3395	9	9	fca-3	cortex	exp1	7			0.11
0.31	255279	253	173	55	0.22	(254, 175, 51)	0.72	0.29	1	3397	9	9	fca-3	cortex	exp1	7			0.43
0.37	206732	253	248	57	0.23	(258, 251, 55)	0.86	0.34	1	3405	9	9	fca-3	cortex	exp1	7			0.52
0.39	174295	253	311	60	0.23	(254, 316, 66)	0.89	0.36	1	3408	9	9	fca-3	cortex	exp1	7			0.53
0.31	188249	251	433	67	0.24	(258, 434, 54)	0.4	0.31	0.99	3411	9	9	fca-3	cortex	exp1	7			0.0940404
0.31	213420	252	371	64	0.22	(263, 353, 54)	0.4	0.3	0.98	3412	9	9	fca-3	cortex	exp1	7			0.108163
0.35	145211	256	493	75	0.23	(252, 492, 68)	0.53	0.34	1	3413	9	9	fca-3	cortex	exp1	7			0.19
0.33	115951	258	585	80	0.28	(257, 580, 71)	0.37	0.33	1	3421	9	9	fca-3	cortex	exp1	7			0.04
0.67	116941	259	624	82	0.23	(258, 624, 86)	2.06	0.54	1	3423	9	9	fca-3	cortex	exp1	7			1.52
0.22	704019	317	122	90	0.28	(350, 127, 73)	0.33	0.22	0.96	5	10	9	fca-3	cortex	exp1	7			0.12375
0.27	356163	323	238	91	0.24	(301, 273, 109)	0.4	0.28	0.52	10	10	9	fca-3	cortex	exp1	7			0.489231
0.27	331854	326	318	93	0.24	(338, 293, 67)	0.34	0.28	0.99	13	10	9	fca-3	cortex	exp1	7			0.0634343
0.33	169333	324	476	100	0.24	(323, 467, 87)	0.39	0.34	0.99	42	10	9	fca-3	cortex	exp1	7			0.0539394
0.28	162236	323	383	95	0.22	(334, 382, 109)	0.33	0.29	0.54	44	10	9	fca-3	cortex	exp1	7			0.321111
0.3	132327	328	423	96	0.23	(338, 429, 109)	0.34	0.3	0.54	62	10	9	fca-3	cortex	exp1	7			0.32963
0.28	81435	328	558	99	0.22	(320, 557, 90)	0.29	0.29	0.98	101	10	9	fca-3	cortex	exp1	7			0.00591837
0.28	75420	325	525	100	0.24	(316, 522, 87)	0.3	0.29	0.95	106	10	9	fca-3	cortex	exp1	7			0.0257895
0.28	57243	324	612	101	0.23	(331, 613, 93)	0.28	0.3	0.93	138	10	9	fca-3	cortex	exp1	7			0.00107527
0.28	47212	323	640	105	0.22	(309, 643, 101)	0.29	0.29	0.95	154	10	9	fca-3	cortex	exp1	7			0.0152632
0.3	46695	324	668	104	0.24	(311, 670, 99)	0.3	0.31	0.94	156	10	9	fca-3	cortex	exp1	7			0.00914894
0.27	45776	327	586	104	0.24	(323, 586, 102)	0.27	0.28	0.92	159	10	9	fca-3	cortex	exp1	7			0.0134783
0.26	34472	321	722	107	0.27	(318, 722, 107)	0.25	0.27	0.65	188	10	9	fca-3	cortex	exp1	7			0.114615
0.3	27945	320	748	107	0.27	(325, 748, 105)	0.28	0.32	0.76	206	10	9	fca-3	cortex	exp1	7			0.0484211
0.26	38779	324	696	107	0.27	(330, 697, 106)	0.26	0.28	0.73	3424	10	9	fca-3	cortex	exp1	7			0.0761644
0.35	382138	123	124	74	0.23	(132, 129, 80)	1.11	0.34	0.97	8	1	10	fca-3	epidermis	exp1	7			0.80433
0.45	173621	137	545	84	0.24	(143, 545, 81)	1.13	0.43	1	54	1	10	fca-3	epidermis	exp1	7			0.7
0.36	171915	131	270	69	0.23	(141, 277, 78)	0.49	0.36	0.98	55	1	10	fca-3	epidermis	exp1	7			0.14
0.5	146342	144	617	92	0.22	(150, 625, 92)	1.19	0.47	1	65	1	10	fca-3	epidermis	exp1	7			0.72
0.32	184586	137	453	75	0.22	(128, 444, 65)	0.36	0.32	0.95	76	1	10	fca-3	epidermis	exp1	7			0.0589474
0.53	73767	147	670	93	0.23	(156, 673, 94)	1	0.48	1	112	1	10	fca-3	epidermis	exp1	7			0.52
0.49	63019	154	796	98	0.22	(158, 800, 100)	0.67	0.46	0.99	131	1	10	fca-3	epidermis	exp1	7			0.216768
0.49	60259	157	829	100	0.23	(160, 829, 106)	0.72	0.47	0.75	137	1	10	fca-3	epidermis	exp1	7			0.49
0.59	56763	147	705	97	0.28	(154, 710, 98)	1.03	0.52	0.99	143	1	10	fca-3	epidermis	exp1	7			0.520404
0.52	54619	149	740	96	0.23	(153, 740, 99)	0.77	0.48	1	148	1	10	fca-3	epidermis	exp1	7			0.29
0.49	53809	162	864	102	0.21	(166, 867, 104)	0.74	0.44	0.86	150	1	10	fca-3	epidermis	exp1	7			0.420465
0.55	51493	153	768	96	0.23	(159, 769, 99)	0.83	0.49	0.96	154	1	10	fca-3	epidermis	exp1	7			0.374583
0.37	39557	161	894	104	0.23	(155, 895, 102)	0.4	0.37	0.94	180	1	10	fca-3	epidermis	exp1	7			0.0555319
0.45	31093	162	924	106	0.21	(165, 925, 108)	0.53	0.45	0.6	196	1	10	fca-3	epidermis	exp1	7			0.433333
0.51	29711	162	956	109	0.2	(165, 954, 109)	0.65	0.45	0.51	198	1	10	fca-3	epidermis	exp1	7			0.82451
0.48	151846	134	354	71	0.22	(145, 359, 77)	1.29	0.43	1	4513	1	10	fca-3	epidermis	exp1	7			0.86
0.26	288497	160	121	38	0.2	(165, 112, 63)	0.31	0.26	0.98	14	2	10	fca-3	epidermis	exp1	7			0.0563265
0.42	261865	170	290	36	0.21	(174, 294, 32)	0.71	0.41	1	17	2	10	fca-3	epidermis	exp1	7			0.3
0.4	258337	175	372	40	0.21	(167, 361, 16)	0.46	0.4	0.99	18	2	10	fca-3	epidermis	exp1	7			0.0646465
0.29	238983	163	203	34	0.19	(174, 232, 41)	0.34	0.29	0.98	25	2	10	fca-3	epidermis	exp1	7			0.0569388
0.39	207611	174	454	41	0.2	(171, 463, 44)	0.48	0.39	1	35	2	10	fca-3	epidermis	exp1	7			0.09
0.39	198981	175	523	42	0.21	(168, 536, 30)	0.46	0.39	1	39	2	10	fca-3	epidermis	exp1	7			0.07
0.4	153232	183	654	58	0.21	(170, 651, 45)	0.44	0.39	1	61	2	10	fca-3	epidermis	exp1	7			0.05
0.34	100412	174	578	52	0.22	(160, 577, 43)	0.37	0.34	1	82	2	10	fca-3	epidermis	exp1	7			0.03
0.33	98951	203	858	83	0.24	(189, 862, 78)	0.37	0.33	1	84	2	10	fca-3	epidermis	exp1	7			0.04
0.43	93460	183	700	60	0.23	(184, 701, 63)	0.64	0.41	1	87	2	10	fca-3	epidermis	exp1	7			0.23
0.34	92634	179	610	54	0.21	(158, 614, 51)	0.39	0.33	0.98	88	2	10	fca-3	epidermis	exp1	7			0.0679592
0.46	81503	200	818	75	0.22	(200, 819, 78)	0.72	0.43	1	102	2	10	fca-3	epidermis	exp1	7			0.29
0.34	77983	201	898	90	0.28	(204, 895, 83)	0.44	0.34	1	105	2	10	fca-3	epidermis	exp1	7			0.1
0.41	77674	185	731	66	0.24	(192, 732, 67)	0.46	0.4	0.99	106	2	10	fca-3	epidermis	exp1	7			0.0646465
0.35	70383	204	930	92	0.22	(205, 930, 94)	0.46	0.33	1	117	2	10	fca-3	epidermis	exp1	7			0.13
0.4	64591	191	786	69	0.23	(186, 789, 55)	0.48	0.39	1	126	2	10	fca-3	epidermis	exp1	7			0.09
0.39	64439	191	760	66	0.24	(182, 762, 53)	0.44	0.38	0.95	127	2	10	fca-3	epidermis	exp1	7			0.0831579
0.29	42378	205	956	93	0.23	(203, 956, 82)	0.29	0.28	0.85	173	2	10	fca-3	epidermis	exp1	7			0.0611765
0.27	41272	208	975	98	0.22	(202, 975, 85)	0.24	0.27	0.73	176	2	10	fca-3	epidermis	exp1	7			0.0587671
0.3	36218	211	996	100	0.23	(232, 996, 104)	0.26	0.29	0.68	186	2	10	fca-3	epidermis	exp1	7			0.0923529
0.28	27297	210	1013	102	0.21	(196, 1008, 108)	0.18	0.22	0.06	201	2	10	fca-3	epidermis	exp1	7			2.78
0.26	252972	201	79	17	0.16	(212, 118, 27)	0.4	0.25	0.98	21	3	10	fca-3	epidermis	exp1	7			0.158163
0.31	221099	211	253	13	0.15	(220, 293, 23)	0.35	0.31	0.98	32	3	10	fca-3	epidermis	exp1	7			0.0471429
0.35	177361	215	410	14	0.15	(224, 404, 29)	0.43	0.34	0.98	53	3	10	fca-3	epidermis	exp1	7			0.0987755
0.38	104188	216	573	21	0.16	(210, 594, 17)	0.39	0.37	1	81	3	10	fca-3	epidermis	exp1	7			0.02
0.46	78423	220	635	29	0.23	(224, 636, 36)	0.71	0.43	1	104	3	10	fca-3	epidermis	exp1	7			0.28
0.36	75042	216	508	17	0.16	(208, 491, 14)	0.37	0.35	0.97	109	3	10	fca-3	epidermis	exp1	7			0.0314433
0.42	73952	223	685	33	0.2	(224, 689, 41)	0.47	0.41	1	111	3	10	fca-3	epidermis	exp1	7			0.06
0.38	72214	226	737	39	0.25	(220, 730, 28)	0.44	0.38	0.99	114	3	10	fca-3	epidermis	exp1	7			0.0644444
0.35	66290	237	934	67	0.23	(248, 935, 85)	0.37	0.34	0.93	122	3	10	fca-3	epidermis	exp1	7			0.0578495
0.35	60454	233	823	48	0.21	(221, 816, 41)	0.37	0.35	0.98	136	3	10	fca-3	epidermis	exp1	7			0.027551
0.36	58562	236	859	54	0.21	(237, 861, 43)	0.36	0.36	0.97	140	3	10	fca-3	epidermis	exp1	7			0.011134
0.38	55742	232	896	59	0.22	(223, 892, 54)	0.39	0.38	1	144	3	10	fca-3	epidermis	exp1	7			0.01
0.36	55692	241	992	74	0.23	(227, 993, 66)	0.36	0.36	0.92	146	3	10	fca-3	epidermis	exp1	7			0.0313043
0.39	54765	229	780	43	0.21	(231, 783, 37)	0.42	0.39	1	147	3	10	fca-3	epidermis	exp1	7			0.03
0.37	46190	236	968	65	0.22	(241, 968, 55)	0.38	0.37	0.97	166	3	10	fca-3	epidermis	exp1	7			0.0217526
0.36	34221	241	1015	76	0.23	(225, 1008, 71)	0.24	0.34	0.16	191	3	10	fca-3	epidermis	exp1	7			1.16
0.37	227618	261	122	20	0.16	(265, 129, 20)	0.61	0.36	1	31	4	10	fca-3	epidermis	exp1	7			0.25
0.32	209924	269	306	17	0.16	(262, 282, 26)	0.35	0.31	0.96	33	4	10	fca-3	epidermis	exp1	7			0.0545833
0.36	185816	269	393	19	0.18	(253, 423, 12)	0.41	0.36	0.99	43	4	10	fca-3	epidermis	exp1	7			0.0541414
0.44	184370	271	532	28	0.19	(260, 521, 14)	0.55	0.43	0.99	46	4	10	fca-3	epidermis	exp1	7			0.125556
0.42	182818	264	214	19	0.18	(264, 218, 21)	0.8	0.4	1	49	4	10	fca-3	epidermis	exp1	7			0.4
0.38	158665	270	468	23	0.18	(255, 485, 13)	0.46	0.38	1	58	4	10	fca-3	epidermis	exp1	7			0.08
0.39	157001	271	594	29	0.23	(257, 580, 18)	0.47	0.38	0.97	59	4	10	fca-3	epidermis	exp1	7			0.104536
0.4	136104	272	644	30	0.19	(253, 656, 17)	0.48	0.4	0.98	70	4	10	fca-3	epidermis	exp1	7			0.0897959
0.36	111794	275	688	37	0.2	(289, 684, 28)	0.38	0.36	0.99	77	4	10	fca-3	epidermis	exp1	7			0.0238384
0.35	111504	277	726	42	0.21	(260, 731, 31)	0.39	0.35	1	78	4	10	fca-3	epidermis	exp1	7			0.04
0.34	72386	283	759	46	0.26	(296, 760, 36)	0.35	0.33	0.93	113	4	10	fca-3	epidermis	exp1	7			0.0463441
0.3	64284	288	889	62	0.22	(265, 888, 49)	0.31	0.29	0.88	128	4	10	fca-3	epidermis	exp1	7			0.0622727
0.3	62853	291	931	70	0.24	(269, 934, 58)	0.32	0.3	0.9	132	4	10	fca-3	epidermis	exp1	7			0.0555556
0.33	62435	284	782	48	0.21	(304, 783, 58)	0.31	0.33	0.88	133	4	10	fca-3	epidermis	exp1	7			0.0222727
0.31	59573	286	909	68	0.22	(268, 911, 57)	0.32	0.3	0.87	138	4	10	fca-3	epidermis	exp1	7			0.0678161
0.31	59178	284	805	47	0.21	(300, 807, 41)	0.29	0.3	0.9	139	4	10	fca-3	epidermis	exp1	7			0.0222222
0.32	58262	284	827	51	0.21	(291, 831, 40)	0.32	0.32	0.92	141	4	10	fca-3	epidermis	exp1	7			0.0278261
0.35	57850	288	849	56	0.27	(268, 849, 41)	0.33	0.34	0.85	142	4	10	fca-3	epidermis	exp1	7			0.0482353
0.3	54135	295	973	75	0.22	(285, 976, 60)	0.29	0.29	0.86	149	4	10	fca-3	epidermis	exp1	7			0.0472093
0.3	52804	290	952	73	0.27	(270, 953, 72)	0.29	0.29	0.83	151	4	10	fca-3	epidermis	exp1	7			0.0593976
0.3	47414	300	992	83	0.24	(310, 996, 72)	0.26	0.3	0.82	163	4	10	fca-3	epidermis	exp1	7			0.0170732
0.32	46465	286	868	58	0.21	(271, 870, 45)	0.27	0.32	0.78	164	4	10	fca-3	epidermis	exp1	7			0.0261538
0.31	46196	298	1013	84	0.24	(286, 1008, 92)	0.25	0.3	0.29	165	4	10	fca-3	epidermis	exp1	7			0.562069
0.25	344045	324	206	19	0.18	(328, 196, 38)	0.32	0.25	0.97	11	5	10	fca-3	epidermis	exp1	7			0.0798969
0.29	291322	329	352	21	0.16	(313, 366, 22)	0.38	0.29	0.98	13	5	10	fca-3	epidermis	exp1	7			0.0977551
0.23	267797	315	56	24	0.17	(303, 57, 35)	0.31	0.23	0.93	16	5	10	fca-3	epidermis	exp1	7			0.103333
0.42	235831	329	475	24	0.17	(325, 482, 32)	0.89	0.4	1	27	5	10	fca-3	epidermis	exp1	7			0.49
0.56	132025	332	615	38	0.2	(332, 618, 44)	1.42	0.5	1	72	5	10	fca-3	epidermis	exp1	7			0.92
0.4	129903	328	558	29	0.23	(331, 556, 40)	0.59	0.39	0.99	73	5	10	fca-3	epidermis	exp1	7			0.20596
0.57	99443	343	789	58	0.21	(341, 790, 62)	1.12	0.51	1	83	5	10	fca-3	epidermis	exp1	7			0.61
0.38	92327	335	669	43	0.21	(320, 669, 32)	0.47	0.37	1	89	5	10	fca-3	epidermis	exp1	7			0.1
0.33	88908	347	871	69	0.23	(332, 879, 57)	0.37	0.33	0.99	91	5	10	fca-3	epidermis	exp1	7			0.0437374
0.42	87545	350	948	83	0.24	(352, 945, 84)	0.5	0.41	1	93	5	10	fca-3	epidermis	exp1	7			0.09
0.38	81769	338	747	50	0.22	(323, 742, 38)	0.42	0.38	0.99	100	5	10	fca-3	epidermis	exp1	7			0.0442424
0.37	80944	344	834	61	0.22	(328, 834, 48)	0.41	0.37	0.99	103	5	10	fca-3	epidermis	exp1	7			0.0441414
0.41	76048	337	709	46	0.26	(339, 708, 47)	0.49	0.4	1	108	5	10	fca-3	epidermis	exp1	7			0.09
0.36	71719	345	912	72	0.22	(331, 909, 59)	0.39	0.36	0.98	115	5	10	fca-3	epidermis	exp1	7			0.0379592
0.45	65329	354	986	89	0.22	(355, 987, 93)	0.6	0.43	1	125	5	10	fca-3	epidermis	exp1	7			0.17
0.56	36689	352	1013	92	0.22	(354, 1008, 98)	0.52	0.36	0.24	185	5	10	fca-3	epidermis	exp1	7			1.80667
0.24	383500	368	118	77	0.23	(348, 93, 56)	0.3	0.25	0.96	7	6	10	fca-3	epidermis	exp1	7			0.0625
0.27	249517	374	213	65	0.22	(351, 220, 47)	0.31	0.27	0.96	22	6	10	fca-3	epidermis	exp1	7			0.0529167
0.29	205421	379	288	62	0.22	(386, 304, 51)	0.37	0.28	0.98	36	6	10	fca-3	epidermis	exp1	7			0.097551
0.32	199230	384	511	69	0.23	(390, 526, 58)	0.38	0.32	1	37	6	10	fca-3	epidermis	exp1	7			0.06
0.3	185626	379	404	64	0.22	(383, 393, 47)	0.37	0.3	0.99	44	6	10	fca-3	epidermis	exp1	7			0.0737374
0.3	184364	378	349	64	0.22	(381, 334, 46)	0.37	0.3	0.98	47	6	10	fca-3	epidermis	exp1	7			0.077551
0.3	159632	391	656	89	0.22	(410, 660, 92)	0.38	0.3	0.99	57	6	10	fca-3	epidermis	exp1	7			0.0838384
0.31	154118	385	565	76	0.23	(372, 577, 58)	0.35	0.31	0.99	60	6	10	fca-3	epidermis	exp1	7			0.0435354
0.31	147412	382	455	68	0.22	(392, 444, 62)	0.39	0.31	1	64	6	10	fca-3	epidermis	exp1	7			0.08
0.31	142028	386	612	82	0.22	(397, 606, 75)	0.38	0.31	0.99	67	6	10	fca-3	epidermis	exp1	7			0.0738384
0.29	119938	391	702	91	0.23	(411, 697, 98)	0.35	0.29	0.98	74	6	10	fca-3	epidermis	exp1	7			0.0671429
0.3	119854	388	744	92	0.22	(411, 741, 106)	0.36	0.3	0.75	75	6	10	fca-3	epidermis	exp1	7			0.18
0.42	84095	393	782	96	0.23	(392, 783, 98)	0.61	0.4	1	97	6	10	fca-3	epidermis	exp1	7			0.21
0.32	82664	392	816	98	0.22	(404, 819, 94)	0.35	0.32	0.98	99	6	10	fca-3	epidermis	exp1	7			0.0371429
0.29	44676	395	847	100	0.23	(388, 847, 89)	0.28	0.3	0.89	168	6	10	fca-3	epidermis	exp1	7			0.0146067
0.28	39611	391	913	105	0.2	(377, 915, 107)	0.28	0.3	0.66	179	6	10	fca-3	epidermis	exp1	7			0.124242
0.29	38701	394	889	102	0.21	(386, 890, 93)	0.3	0.31	0.89	182	6	10	fca-3	epidermis	exp1	7			0.0270787
0.28	33761	394	868	103	0.22	(378, 870, 101)	0.24	0.3	0.76	192	6	10	fca-3	epidermis	exp1	7			0.0157895
0.3	20831	397	936	107	0.26	(401, 937, 106)	0.24	0.31	0.59	220	6	10	fca-3	epidermis	exp1	7			0.0967797
0.3	19643	396	955	109	0.2	(404, 956, 109)	0.24	0.33	0.4	225	6	10	fca-3	epidermis	exp1	7			0.27
0.2	234071	177	151	98	0.22	(149, 128, 96)	0.38	0.21	0.9	29	7	10	fca-3	cortex	exp1	7			0.212222
0.25	188587	180	303	95	0.22	(165, 321, 86)	0.31	0.26	0.98	42	7	10	fca-3	cortex	exp1	7			0.0563265
0.2	180155	174	229	93	0.23	(173, 250, 70)	0.26	0.21	0.96	50	7	10	fca-3	cortex	exp1	7			0.0608333
0.25	151848	181	431	95	0.22	(181, 424, 72)	0.31	0.26	0.98	62	7	10	fca-3	cortex	exp1	7			0.0563265
0.24	142004	189	500	100	0.23	(171, 509, 90)	0.29	0.26	0.98	68	7	10	fca-3	cortex	exp1	7			0.0359184
0.25	110569	184	556	100	0.23	(168, 548, 109)	0.29	0.26	0.51	79	7	10	fca-3	cortex	exp1	7			0.308627
0.26	106017	181	371	97	0.28	(165, 357, 99)	0.33	0.26	0.93	80	7	10	fca-3	cortex	exp1	7			0.0948387
0.28	417079	231	234	62	0.22	(224, 230, 58)	0.63	0.27	1	10	8	10	fca-3	cortex	exp1	7			0.36
0.31	90358	256	761	93	0.23	(248, 760, 84)	0.34	0.31	0.92	90	8	10	fca-3	cortex	exp1	7			0.0595652
0.35	83447	257	799	94	0.23	(253, 802, 90)	0.48	0.35	0.88	98	8	10	fca-3	cortex	exp1	7			0.195455
0.31	76928	253	738	93	0.23	(243, 739, 82)	0.32	0.31	0.82	107	8	10	fca-3	cortex	exp1	7			0.0802439
0.32	60900	255	824	93	0.23	(256, 824, 95)	0.32	0.31	0.87	135	8	10	fca-3	cortex	exp1	7			0.0578161
0.37	52559	246	781	89	0.22	(255, 782, 94)	0.43	0.36	0.8	152	8	10	fca-3	cortex	exp1	7			0.1775
0.34	50428	256	846	97	0.28	(251, 847, 92)	0.35	0.34	0.92	155	8	10	fca-3	cortex	exp1	7			0.0404348
0.48	49056	261	888	101	0.23	(260, 889, 103)	0.7	0.42	0.69	159	8	10	fca-3	cortex	exp1	7			0.594493
0.54	48832	260	868	102	0.21	(256, 869, 101)	0.85	0.44	0.82	160	8	10	fca-3	cortex	exp1	7			0.596585
0.48	41459	258	909	103	0.22	(256, 909, 104)	0.71	0.39	0.74	175	8	10	fca-3	cortex	exp1	7			0.569459
0.28	329993	229	135	64	0.22	(225, 126, 51)	0.95	0.26	1	4520	8	10	fca-3	cortex	exp1	7			0.69
0.34	256799	237	405	64	0.22	(234, 406, 59)	0.87	0.32	1	4524	8	10	fca-3	cortex	exp1	7			0.55
0.33	235391	241	472	67	0.23	(236, 473, 60)	0.69	0.31	1	4525	8	10	fca-3	cortex	exp1	7			0.38
0.25	329021	239	325	62	0.22	(221, 319, 47)	0.35	0.25	0.99	4526	8	10	fca-3	cortex	exp1	7			0.103535
0.32	147965	238	527	67	0.23	(233, 531, 66)	0.47	0.31	1	4530	8	10	fca-3	cortex	exp1	7			0.16
0.36	168554	241	572	70	0.24	(239, 576, 71)	0.64	0.34	1	4531	8	10	fca-3	cortex	exp1	7			0.3
0.33	146072	245	619	75	0.22	(237, 625, 63)	0.47	0.32	1	4532	8	10	fca-3	cortex	exp1	7			0.15
0.32	127711	248	706	81	0.22	(246, 705, 60)	0.36	0.31	0.98	4533	8	10	fca-3	cortex	exp1	7			0.0573469
0.5	116774	247	663	80	0.28	(242, 663, 78)	1.2	0.44	1	4534	8	10	fca-3	cortex	exp1	7			0.76
0.29	239505	321	382	74	0.23	(319, 381, 74)	0.75	0.27	1	24	9	10	fca-3	cortex	exp1	7			0.48
0.44	178079	327	644	85	0.22	(330, 643, 89)	1.15	0.42	1	51	9	10	fca-3	cortex	exp1	7			0.73
0.37	177487	327	695	93	0.23	(329, 698, 95)	0.75	0.36	1	52	9	10	fca-3	cortex	exp1	7			0.39
0.32	81566	325	732	93	0.23	(323, 733, 97)	0.37	0.33	0.94	101	9	10	fca-3	cortex	exp1	7			0.063617
0.43	68091	331	812	97	0.28	(338, 811, 107)	0.68	0.39	0.67	119	9	10	fca-3	cortex	exp1	7			0.624925
0.39	66319	330	784	97	0.28	(335, 783, 102)	0.54	0.37	0.94	121	9	10	fca-3	cortex	exp1	7			0.204468
0.4	65368	329	756	98	0.22	(332, 757, 100)	0.59	0.37	0.9	124	9	10	fca-3	cortex	exp1	7			0.285556
0.37	63871	330	839	99	0.21	(335, 839, 104)	0.44	0.36	0.85	129	9	10	fca-3	cortex	exp1	7			0.157647
0.31	50131	328	866	102	0.21	(312, 867, 95)	0.32	0.31	0.96	156	9	10	fca-3	cortex	exp1	7			0.0233333
0.33	526870	309	133	67	0.23	(317, 134, 66)	1.48	0.31	1	4536	9	10	fca-3	cortex	exp1	7			1.17
0.33	266311	311	248	64	0.22	(310, 249, 63)	1.28	0.3	1	4537	9	10	fca-3	cortex	exp1	7			0.98
0.23	222300	315	315	64	0.22	(312, 317, 51)	0.31	0.23	1	4538	9	10	fca-3	cortex	exp1	7			0.08
0.27	206896	317	441	67	0.23	(307, 456, 47)	0.37	0.27	0.99	4540	9	10	fca-3	cortex	exp1	7			0.103737
0.27	167341	323	493	76	0.23	(333, 492, 65)	0.32	0.26	0.97	4541	9	10	fca-3	cortex	exp1	7			0.0698969
0.33	181891	322	542	78	0.22	(322, 544, 75)	0.64	0.31	1	4542	9	10	fca-3	cortex	exp1	7			0.33
0.46	171137	325	592	82	0.22	(324, 598, 85)	1.34	0.41	1	4543	9	10	fca-3	cortex	exp1	7			0.93
0.23	240144	134	113	58	0.18	(146, 115, 64)	0.3	0.23	1	17	1	1	Ler	epidermis	exp1	7			0.07
0.25	197716	127	336	56	0.18	(122, 330, 42)	0.3	0.25	0.99	25	1	1	Ler	epidermis	exp1	7			0.0530303
0.23	195375	127	268	60	0.19	(111, 286, 57)	0.26	0.24	0.99	26	1	1	Ler	epidermis	exp1	7			0.0226263
0.23	181148	134	195	58	0.18	(137, 196, 41)	0.26	0.23	0.98	34	1	1	Ler	epidermis	exp1	7			0.0353061
0.22	171643	137	35	58	0.18	(133, 22, 41)	0.25	0.22	0.97	35	1	1	Ler	epidermis	exp1	7			0.037732
0.25	143313	125	392	56	0.18	(122, 383, 34)	0.28	0.25	0.97	48	1	1	Ler	epidermis	exp1	7			0.0386598
0.23	100175	136	601	55	0.18	(116, 601, 50)	0.28	0.23	0.98	4658	1	1	Ler	epidermis	exp1	7			0.0557143
0.24	101200	134	515	53	0.19	(142, 519, 41)	0.3	0.25	1	4661	1	1	Ler	epidermis	exp1	7			0.05
0.23	137746	123	437	59	0.18	(121, 428, 38)	0.28	0.23	0.97	54	1	1	Ler	epidermis	exp1	7			0.0586598
0.29	126395	131	636	58	0.18	(137, 642, 43)	0.39	0.29	1	57	1	1	Ler	epidermis	exp1	7			0.1
0.25	124609	124	480	59	0.18	(127, 480, 38)	0.33	0.25	1	60	1	1	Ler	epidermis	exp1	7			0.08
0.21	68997	146	785	57	0.23	(133, 786, 49)	0.23	0.2	0.99	76	1	1	Ler	epidermis	exp1	7			0.0323232
0.25	98921	136	716	59	0.18	(105, 719, 73)	0.35	0.24	0.46	80	1	1	Ler	epidermis	exp1	7			0.52087
0.24	84548	148	855	55	0.18	(149, 852, 16)	0.27	0.23	0.7	95	1	1	Ler	epidermis	exp1	7			0.155714
0.24	76450	133	549	51	0.19	(125, 549, 32)	0.27	0.24	0.95	103	1	1	Ler	epidermis	exp1	7			0.0442105
0.22	71473	144	751	51	0.19	(135, 754, 39)	0.25	0.22	0.98	107	1	1	Ler	epidermis	exp1	7			0.035102
0.26	60660	138	671	55	0.18	(126, 670, 54)	0.27	0.26	0.92	118	1	1	Ler	epidermis	exp1	7			0.0334783
0.24	57211	134	573	50	0.25	(122, 575, 31)	0.25	0.23	0.81	124	1	1	Ler	epidermis	exp1	7			0.078642
0.25	53893	151	830	47	0.2	(144, 837, 17)	0.25	0.24	0.78	127	1	1	Ler	epidermis	exp1	7			0.0805128
0.22	38446	151	811	47	0.2	(152, 812, 36)	0.2	0.21	0.81	162	1	1	Ler	epidermis	exp1	7			0.0369136
0.28	38174	138	690	53	0.19	(143, 692, 43)	0.26	0.27	0.78	163	1	1	Ler	epidermis	exp1	7			0.0633333
0.25	239382	168	256	23	0.2	(162, 219, 12)	0.29	0.25	0.99	18	2	1	Ler	epidermis	exp1	7			0.0429293
0.25	279605	173	141	23	0.2	(187, 163, 33)	0.3	0.25	1	4663	2	1	Ler	epidermis	exp1	7			0.05
0.29	177472	168	352	25	0.19	(158, 387, 12)	0.33	0.29	0.99	4668	2	1	Ler	epidermis	exp1	7			0.0433333
0.28	52775	176	720	23	0.2	(165, 719, 11)	0.34	0.27	0.94	4671	2	1	Ler	epidermis	exp1	7			0.0917021
0.31	59644	173	648	21	0.19	(160, 650, 9)	0.4	0.29	0.96	4672	2	1	Ler	epidermis	exp1	7			0.126667
0.3	74666	171	572	21	0.19	(159, 565, 11)	0.35	0.29	0.97	4673	2	1	Ler	epidermis	exp1	7			0.0708247
0.32	67632	168	498	21	0.19	(161, 499, 11)	0.38	0.3	0.99	4675	2	1	Ler	epidermis	exp1	7			0.0838384
0.3	71757	164	422	21	0.19	(160, 420, 10)	0.34	0.29	0.96	4676	2	1	Ler	epidermis	exp1	7			0.0641667
0.32	85749	179	782	24	0.19	(178, 797, 12)	0.37	0.31	0.96	91	2	1	Ler	epidermis	exp1	7			0.0754167
0.29	82840	166	460	23	0.2	(167, 471, 11)	0.33	0.29	0.97	98	2	1	Ler	epidermis	exp1	7			0.0502062
0.34	63581	169	533	21	0.19	(156, 537, 9)	0.41	0.33	0.92	138	2	1	Ler	epidermis	exp1	7			0.115652
0.28	44026	180	745	22	0.2	(191, 748, 12)	0.32	0.26	0.91	145	2	1	Ler	epidermis	exp1	7			0.0916484
0.36	68167	173	684	24	0.19	(167, 685, 13)	0.49	0.34	0.92	146	2	1	Ler	epidermis	exp1	7			0.192609
0.34	67086	170	610	23	0.2	(160, 609, 11)	0.42	0.33	0.97	191	2	1	Ler	epidermis	exp1	7			0.10299
0.23	166311	227	170	25	0.19	(229, 151, 12)	0.3	0.23	0.99	39	3	1	Ler	epidermis	exp1	7			0.0730303
0.24	124815	222	235	25	0.19	(226, 237, 10)	0.28	0.24	0.98	59	3	1	Ler	epidermis	exp1	7			0.0457143
0.24	114819	222	342	28	0.19	(224, 355, 11)	0.29	0.23	0.97	4669	3	1	Ler	epidermis	exp1	7			0.0689691
0.28	76181	222	592	24	0.19	(212, 596, 11)	0.37	0.27	0.96	4674	3	1	Ler	epidermis	exp1	7			0.115417
0.29	85353	223	704	25	0.19	(211, 700, 10)	0.38	0.27	0.97	4681	3	1	Ler	epidermis	exp1	7			0.121753
0.24	79596	222	667	26	0.24	(219, 666, 10)	0.31	0.23	0.96	4682	3	1	Ler	epidermis	exp1	7			0.0929167
0.33	83876	221	630	24	0.19	(227, 625, 12)	0.46	0.32	0.99	4683	3	1	Ler	epidermis	exp1	7			0.144646
0.25	84455	219	553	25	0.19	(212, 559, 10)	0.32	0.24	0.93	4684	3	1	Ler	epidermis	exp1	7			0.104086
0.24	73448	220	515	25	0.19	(213, 521, 11)	0.29	0.23	0.94	4685	3	1	Ler	epidermis	exp1	7			0.0785106
0.27	90386	218	473	22	0.2	(211, 465, 10)	0.35	0.26	0.96	4686	3	1	Ler	epidermis	exp1	7			0.104583
0.24	68608	226	738	27	0.19	(220, 737, 10)	0.33	0.23	0.97	108	3	1	Ler	epidermis	exp1	7			0.110206
0.25	123309	219	293	27	0.19	(223, 287, 11)	0.38	0.24	0.92	137	3	1	Ler	epidermis	exp1	7			0.173043
0.46	48551	223	768	24	0.19	(226, 769, 30)	0.64	0.41	0.93	139	3	1	Ler	epidermis	exp1	7			0.278172
0.31	43297	228	903	26	0.24	(233, 905, 12)	0.34	0.29	0.85	148	3	1	Ler	epidermis	exp1	7			0.11
0.73	43252	224	811	30	0.2	(227, 811, 33)	1.21	0.58	0.86	149	3	1	Ler	epidermis	exp1	7			0.826977
0.69	38796	228	831	28	0.19	(227, 832, 35)	1.07	0.53	0.82	160	3	1	Ler	epidermis	exp1	7			0.774878
0.39	38053	224	851	29	0.19	(228, 852, 24)	0.38	0.36	0.78	164	3	1	Ler	epidermis	exp1	7			0.127179
0.27	37022	229	885	31	0.19	(230, 885, 12)	0.21	0.26	0.65	166	3	1	Ler	epidermis	exp1	7			0.0630769
0.34	159021	217	407	26	0.24	(219, 409, 31)	0.62	0.32	0.93	177	3	1	Ler	epidermis	exp1	7			0.346667
0.39	32226	227	867	27	0.19	(230, 869, 29)	0.33	0.36	0.7	180	3	1	Ler	epidermis	exp1	7			0.111429
0.49	31952	223	791	24	0.19	(224, 791, 30)	0.56	0.43	0.8	182	3	1	Ler	epidermis	exp1	7			0.27
0.24	263175	380	133	26	0.24	(369, 107, 41)	0.38	0.24	0.98	15	4	1	Ler	epidermis	exp1	7			0.147755
0.21	193229	388	431	51	0.19	(375, 431, 24)	0.24	0.22	1	28	4	1	Ler	epidermis	exp1	7			0.02
0.24	154312	389	487	51	0.19	(398, 489, 42)	0.3	0.24	0.99	42	4	1	Ler	epidermis	exp1	7			0.0630303
0.22	144665	386	536	52	0.18	(394, 535, 43)	0.27	0.23	1	46	4	1	Ler	epidermis	exp1	7			0.04
0.25	124816	375	382	31	0.19	(385, 399, 25)	0.26	0.25	1	58	4	1	Ler	epidermis	exp1	7			0.01
0.23	104419	375	762	55	0.18	(386, 756, 55)	0.28	0.23	0.97	74	4	1	Ler	epidermis	exp1	7			0.0586598
0.22	102124	382	618	53	0.19	(373, 618, 31)	0.27	0.22	0.98	77	4	1	Ler	epidermis	exp1	7			0.0555102
0.23	101138	380	654	54	0.19	(377, 653, 34)	0.27	0.23	1	78	4	1	Ler	epidermis	exp1	7			0.04
0.24	144720	376	250	26	0.24	(366, 274, 28)	0.25	0.24	0.99	4688	4	1	Ler	epidermis	exp1	7			0.0125253
0.25	94495	376	322	27	0.19	(377, 329, 21)	0.26	0.25	1	4689	4	1	Ler	epidermis	exp1	7			0.01
0.24	93883	380	721	53	0.19	(406, 716, 62)	0.26	0.24	0.91	87	4	1	Ler	epidermis	exp1	7			0.0457143
0.23	92262	382	584	49	0.18	(376, 587, 31)	0.27	0.23	0.99	88	4	1	Ler	epidermis	exp1	7			0.0427273
0.25	89928	367	797	51	0.19	(377, 800, 50)	0.29	0.25	1	90	4	1	Ler	epidermis	exp1	7			0.04
0.25	85659	376	692	48	0.18	(371, 693, 29)	0.31	0.25	0.99	92	4	1	Ler	epidermis	exp1	7			0.0631313
0.23	279698	331	57	26	0.24	(350, 102, 11)	0.32	0.23	0.95	12	5	1	Ler	epidermis	exp1	7			0.106842
0.24	81867	326	482	32	0.2	(345, 481, 20)	0.29	0.24	0.98	31	5	1	Ler	epidermis	exp1	7			0.0559184
0.23	177292	326	274	27	0.19	(337, 306, 17)	0.26	0.23	1	40	5	1	Ler	epidermis	exp1	7			0.03
0.25	189997	325	361	29	0.19	(340, 383, 11)	0.32	0.25	0.97	4690	5	1	Ler	epidermis	exp1	7			0.0798969
0.25	241783	329	173	27	0.19	(342, 138, 11)	0.29	0.25	0.94	4693	5	1	Ler	epidermis	exp1	7			0.0585106
0.26	144377	327	431	32	0.2	(344, 418, 14)	0.31	0.25	0.94	4701	5	1	Ler	epidermis	exp1	7			0.0797872
0.24	61951	331	514	30	0.2	(343, 517, 20)	0.26	0.24	0.99	4707	5	1	Ler	epidermis	exp1	7			0.0226263
0.24	78450	320	729	34	0.19	(321, 726, 10)	0.34	0.23	0.9	101	5	1	Ler	epidermis	exp1	7			0.147778
0.29	77453	327	644	32	0.2	(331, 645, 12)	0.35	0.27	0.93	102	5	1	Ler	epidermis	exp1	7			0.106344
0.22	54271	316	821	37	0.2	(297, 824, 48)	0.23	0.22	0.93	4709	5	1	Ler	epidermis	exp1	7			0.0273118
0.26	80060	323	792	28	0.19	(341, 793, 10)	0.36	0.24	0.94	4710	5	1	Ler	epidermis	exp1	7			0.142979
0.26	71848	325	674	34	0.19	(341, 674, 14)	0.29	0.26	0.88	106	5	1	Ler	epidermis	exp1	7			0.0695455
0.3	68414	330	549	30	0.2	(331, 552, 35)	0.38	0.29	1	109	5	1	Ler	epidermis	exp1	7			0.09
0.24	70562	319	761	35	0.19	(304, 763, 41)	0.24	0.23	0.97	4711	5	1	Ler	epidermis	exp1	7			0.0174227
0.27	100279	321	614	30	0.2	(328, 612, 12)	0.35	0.26	0.98	4712	5	1	Ler	epidermis	exp1	7			0.0971429
0.24	62796	327	700	30	0.2	(349, 700, 11)	0.31	0.22	0.83	114	5	1	Ler	epidermis	exp1	7			0.153494
0.25	58893	328	581	29	0.19	(321, 579, 19)	0.26	0.25	0.92	121	5	1	Ler	epidermis	exp1	7			0.0326087
0.22	151105	195	323	68	0.19	(185, 322, 62)	0.31	0.22	1	6	6	1	Ler	cortex	exp1	7			0.09
0.22	329494	204	53	55	0.18	(223, 13, 10)	0.34	0.23	0.95	10	6	1	Ler	cortex	exp1	7			0.127895
0.2	202098	193	247	65	0.18	(190, 251, 56)	0.24	0.2	0.97	24	6	1	Ler	cortex	exp1	7			0.0474227
0.23	117021	192	428	64	0.23	(211, 420, 52)	0.31	0.24	0.98	305	6	1	Ler	cortex	exp1	7			0.0763265
0.2	255376	198	160	65	0.18	(192, 149, 55)	0.26	0.2	1	4666	6	1	Ler	cortex	exp1	7			0.06
0.28	134484	188	380	65	0.18	(192, 384, 63)	0.55	0.27	1	4678	6	1	Ler	cortex	exp1	7			0.28
0.22	70103	197	730	65	0.18	(188, 728, 64)	0.25	0.22	0.98	4713	6	1	Ler	cortex	exp1	7			0.035102
0.22	44075	196	644	64	0.23	(209, 645, 69)	0.21	0.22	0.73	4714	6	1	Ler	cortex	exp1	7			0.0676712
0.21	56524	202	578	62	0.18	(221, 578, 58)	0.22	0.21	0.91	4715	6	1	Ler	cortex	exp1	7			0.0317582
0.2	133758	194	477	63	0.18	(201, 469, 52)	0.22	0.2	0.98	4717	6	1	Ler	cortex	exp1	7			0.0244898
0.21	60761	199	760	65	0.18	(184, 762, 71)	0.23	0.22	0.61	117	6	1	Ler	cortex	exp1	7			0.157049
0.22	119252	194	523	63	0.18	(174, 531, 64)	0.25	0.22	1	4719	6	1	Ler	cortex	exp1	7			0.03
0.21	64342	200	557	63	0.18	(215, 558, 73)	0.21	0.22	0.51	4720	6	1	Ler	cortex	exp1	7			0.191765
0.23	56807	201	623	62	0.18	(178, 623, 57)	0.23	0.23	0.89	4721	6	1	Ler	cortex	exp1	7			0.028427
0.22	84954	205	696	64	0.23	(181, 695, 66)	0.27	0.22	0.93	4722	6	1	Ler	cortex	exp1	7			0.0703226
0.25	63944	198	793	65	0.18	(216, 795, 57)	0.29	0.25	0.91	131	6	1	Ler	cortex	exp1	7			0.0686813
0.21	53732	199	599	62	0.18	(217, 600, 59)	0.22	0.21	0.85	170	6	1	Ler	cortex	exp1	7			0.0488235
0.21	39962	204	666	64	0.23	(203, 666, 69)	0.2	0.21	0.65	194	6	1	Ler	cortex	exp1	7			0.0976923
0.9	339126	164	199	66	1.35	(180, 195, 76)	5.28	0.78	0.93	3591	1	1	fca-1	epidermis	exp1	15			4.89742
1.12	377486	162	334	66	1.35	(173, 347, 73)	6.16	0.99	1	3592	1	1	fca-1	epidermis	exp1	15			5.17
1.13	181523	163	440	67	1.34	(176, 451, 75)	4.25	0.95	1	3593	1	1	fca-1	epidermis	exp1	15			3.3
1.5	163208	161	507	63	1.4	(172, 506, 70)	5.7	1.24	1	3594	1	1	fca-1	epidermis	exp1	15			4.46
1.62	138331	164	566	63	1.4	(174, 573, 66)	5.4	1.34	1	3596	1	1	fca-1	epidermis	exp1	15			4.06
2.33	139335	170	620	64	1.37	(174, 623, 64)	7.59	1.94	1	3597	1	1	fca-1	epidermis	exp1	15			5.65
2.66	130940	170	671	62	1.4	(175, 676, 64)	8.18	2.22	1	3598	1	1	fca-1	epidermis	exp1	15			5.96
3.12	129846	172	721	61	1.4	(178, 723, 62)	9.93	2.58	1	3599	1	1	fca-1	epidermis	exp1	15			7.35
3.19	87043	183	776	59	1.44	(189, 778, 58)	7.88	2.61	1	3601	1	1	fca-1	epidermis	exp1	15			5.27
3.87	66134	186	820	58	1.44	(192, 821, 58)	10.19	2.8	1	3603	1	1	fca-1	epidermis	exp1	15			7.39
3.4	63999	192	859	56	1.48	(196, 861, 58)	8.39	2.51	1	3604	1	1	fca-1	epidermis	exp1	15			5.88
1.17	277451	190	169	29	1.59	(204, 183, 44)	7.97	0.92	0.97	25	2	1	fca-1	epidermis	exp1	15			7.29649
1.41	218405	189	289	30	1.57	(199, 297, 44)	6.77	1.16	1	30	2	1	fca-1	epidermis	exp1	15			5.61
1.8	211764	189	394	31	1.56	(201, 416, 42)	9.09	1.45	1	33	2	1	fca-1	epidermis	exp1	15			7.64
2.15	149917	191	561	29	1.59	(199, 564, 37)	7.59	1.78	1	49	2	1	fca-1	epidermis	exp1	15			5.81
4.22	104647	199	702	30	1.57	(201, 708, 31)	13.61	3.27	1	66	2	1	fca-1	epidermis	exp1	15			10.34
3.92	104211	208	813	28	1.58	(211, 814, 26)	12.17	3.08	1	67	2	1	fca-1	epidermis	exp1	15			9.09
2.68	74470	196	619	31	1.56	(202, 621, 33)	5.9	2.2	1	93	2	1	fca-1	epidermis	exp1	15			3.7
2.89	67103	194	653	28	1.58	(199, 661, 32)	6.37	2.3	0.99	103	2	1	fca-1	epidermis	exp1	15			4.13434
4.09	104727	202	757	27	1.57	(201, 745, 25)	5.29	3.96	0.99	114	2	1	fca-1	epidermis	exp1	15			1.38343
4.77	44562	212	880	27	1.57	(213, 883, 26)	9.1	3.55	0.98	135	2	1	fca-1	epidermis	exp1	15			5.73571
4.83	38918	210	853	24	1.57	(212, 853, 24)	8.68	3.51	0.96	159	2	1	fca-1	epidermis	exp1	15			5.53167
1.96	180288	189	482	30	1.57	(198, 486, 37)	8.51	1.59	1	3607	2	1	fca-1	epidermis	exp1	15			6.92
1.09	413150	235	93	24	1.57	(231, 88, 20)	6.29	0.97	1	16	3	1	fca-1	epidermis	exp1	15			5.32
2.17	239915	234	349	24	1.57	(232, 351, 24)	9.26	1.88	1	27	3	1	fca-1	epidermis	exp1	15			7.38
2.24	123573	235	515	23	1.58	(236, 516, 20)	6.92	1.85	1	59	3	1	fca-1	epidermis	exp1	15			5.07
3.54	101498	238	558	27	1.57	(239, 560, 26)	11.35	2.72	1	71	3	1	fca-1	epidermis	exp1	15			8.63
4.01	101365	245	630	28	1.58	(244, 631, 28)	12.14	3.16	1	72	3	1	fca-1	epidermis	exp1	15			8.98
4.28	99065	240	595	25	1.58	(239, 596, 24)	13.3	3.3	1	75	3	1	fca-1	epidermis	exp1	15			10
4.05	81214	240	664	25	1.58	(240, 665, 24)	10.86	3.13	0.98	80	3	1	fca-1	epidermis	exp1	15			7.95163
4.31	78100	245	720	23	1.58	(245, 721, 22)	11	3.37	0.98	85	3	1	fca-1	epidermis	exp1	15			7.85449
5.25	75843	250	750	24	1.57	(247, 749, 20)	14.19	3.96	1	90	3	1	fca-1	epidermis	exp1	15			10.23
4.31	72388	243	691	25	1.58	(242, 692, 23)	10.91	3.28	0.97	99	3	1	fca-1	epidermis	exp1	15			7.96742
4.34	55199	253	804	25	1.58	(251, 804, 20)	8.71	3.36	0.91	120	3	1	fca-1	epidermis	exp1	15			6.21143
4.72	50236	253	847	21	1.55	(253, 847, 17)	9.1	3.58	0.88	125	3	1	fca-1	epidermis	exp1	15			6.76091
5.02	47848	253	870	22	1.58	(252, 870, 17)	9.59	3.73	0.85	127	3	1	fca-1	epidermis	exp1	15			7.55235
5.56	46033	255	910	21	1.55	(252, 910, 18)	10.55	4.07	0.83	130	3	1	fca-1	epidermis	exp1	15			8.64084
6.84	44006	256	948	23	1.58	(254, 948, 18)	12.86	4.91	0.83	138	3	1	fca-1	epidermis	exp1	15			10.584
4.74	43593	252	890	20	1.55	(255, 890, 20)	8.07	3.6	0.8	141	3	1	fca-1	epidermis	exp1	15			6.4875
5.62	42634	262	986	28	1.58	(259, 986, 22)	9.67	4.16	0.77	144	3	1	fca-1	epidermis	exp1	15			8.39844
6.18	41192	250	826	20	1.55	(249, 826, 17)	11.24	4.44	0.85	150	3	1	fca-1	epidermis	exp1	15			8.78353
4.72	40615	258	929	25	1.58	(252, 929, 19)	7.38	3.6	0.74	153	3	1	fca-1	epidermis	exp1	15			6.37297
4.82	39353	266	1004	27	1.57	(266, 1004, 25)	7.57	3.75	0.61	156	3	1	fca-1	epidermis	exp1	15			8.65984
7.43	37552	259	967	22	1.58	(259, 967, 16)	13.17	5.07	0.78	166	3	1	fca-1	epidermis	exp1	15			11.8146
2.27	244073	236	444	26	1.58	(235, 446, 22)	9.64	1.96	1	3606	3	1	fca-1	epidermis	exp1	15			7.68
1.49	308956	237	236	23	1.58	(233, 232, 25)	6.54	1.33	1	3609	3	1	fca-1	epidermis	exp1	15			5.21
4.97	58788	245	779	20	1.55	(245, 778, 15)	11.51	3.68	0.98	3611	3	1	fca-1	epidermis	exp1	15			8.0649
2.34	212924	363	397	30	1.57	(362, 397, 36)	9.78	1.99	1	31	4	1	fca-1	epidermis	exp1	15			7.79
1.42	211969	360	316	31	1.56	(361, 317, 34)	5.18	1.25	1	32	4	1	fca-1	epidermis	exp1	15			3.93
3.15	141063	366	572	33	1.56	(366, 572, 36)	11.78	2.52	1	52	4	1	fca-1	epidermis	exp1	15			9.26
3.92	114936	365	712	33	1.56	(362, 713, 33)	11.6	3.21	1	64	4	1	fca-1	epidermis	exp1	15			8.39
3.47	59358	369	746	34	1.54	(369, 747, 36)	6.63	2.81	0.91	113	4	1	fca-1	epidermis	exp1	15			4.47571
4.4	54269	367	768	32	1.56	(368, 769, 35)	8.8	3.38	0.9	121	4	1	fca-1	epidermis	exp1	15			6.39778
5.13	46861	370	790	30	1.57	(368, 790, 30)	9.34	3.86	0.82	129	4	1	fca-1	epidermis	exp1	15			7.53024
4.65	121071	365	669	32	1.56	(361, 670, 31)	15.05	3.75	1	3619	4	1	fca-1	epidermis	exp1	15			11.3
1.32	289790	359	129	24	1.57	(356, 124, 30)	5.94	1.16	1	3623	4	1	fca-1	epidermis	exp1	15			4.78
1.29	242854	359	232	28	1.58	(359, 225, 31)	4.57	1.16	1	3625	4	1	fca-1	epidermis	exp1	15			3.41
2.61	199826	362	465	32	1.56	(361, 469, 38)	10.12	2.23	1	3632	4	1	fca-1	epidermis	exp1	15			7.89
2.66	149980	370	518	34	1.54	(364, 525, 37)	10.2	2.14	0.99	3642	4	1	fca-1	epidermis	exp1	15			8.16303
3.39	133308	368	622	34	1.54	(366, 622, 36)	11.43	2.77	1	3643	4	1	fca-1	epidermis	exp1	15			8.66
0.9	378739	412	101	44	1.48	(402, 123, 53)	5.78	0.77	1	18	5	1	fca-1	epidermis	exp1	15			5.01
1.33	323425	413	252	48	1.49	(409, 266, 62)	7.9	1.13	1	22	5	1	fca-1	epidermis	exp1	15			6.77
1.36	251478	416	363	50	1.5	(406, 367, 61)	6.9	1.14	0.99	3648	5	1	fca-1	epidermis	exp1	15			5.8297
1.71	230530	419	456	55	1.47	(410, 464, 62)	8.42	1.42	1	3649	5	1	fca-1	epidermis	exp1	15			7
1.67	158083	420	540	59	1.44	(415, 548, 64)	5.75	1.41	1	3657	5	1	fca-1	epidermis	exp1	15			4.34
2.69	106518	420	610	55	1.47	(416, 614, 55)	8.63	2.1	1	3658	5	1	fca-1	epidermis	exp1	15			6.53
2.72	87812	418	666	56	1.48	(417, 669, 58)	8.02	2.06	1	3659	5	1	fca-1	epidermis	exp1	15			5.96
3.27	78231	419	717	57	1.46	(418, 720, 56)	9.16	2.45	1	3660	5	1	fca-1	epidermis	exp1	15			6.71
4.21	70127	421	762	58	1.44	(417, 760, 56)	11.85	2.99	1	3661	5	1	fca-1	epidermis	exp1	15			8.86
4.94	75234	418	810	58	1.44	(420, 814, 58)	14.33	3.56	1	3662	5	1	fca-1	epidermis	exp1	15			10.77
1.53	436338	226	267	81	1.35	(209, 278, 79)	14.05	1.3	1	12	6	1	fca-1	cortex	exp1	15			12.75
1.23	327084	227	365	83	1.36	(215, 373, 86)	6.19	1.1	1	21	6	1	fca-1	cortex	exp1	15			5.09
1.75	162056	225	539	80	1.36	(222, 543, 88)	6.46	1.44	1	46	6	1	fca-1	cortex	exp1	15			5.02
2.38	134258	227	578	85	1.36	(223, 577, 90)	8.5	1.89	1	55	6	1	fca-1	cortex	exp1	15			6.61
2.03	117948	234	611	84	1.37	(226, 613, 90)	5.62	1.72	1	60	6	1	fca-1	cortex	exp1	15			3.9
3.06	93290	243	755	84	1.37	(229, 753, 78)	7.79	2.61	0.86	76	6	1	fca-1	cortex	exp1	15			6.44814
3.39	80692	235	776	76	1.32	(234, 776, 78)	7.63	2.9	0.95	81	6	1	fca-1	cortex	exp1	15			5.13158
2.35	78257	232	639	83	1.36	(230, 641, 91)	5.07	1.93	0.9	84	6	1	fca-1	cortex	exp1	15			3.70333
3.87	75931	236	707	83	1.36	(231, 709, 88)	10.5	2.83	0.93	89	6	1	fca-1	cortex	exp1	15			8.46032
3.49	73696	238	800	77	1.32	(236, 802, 82)	7.75	2.87	0.94	96	6	1	fca-1	cortex	exp1	15			5.37468
3.4	73625	231	732	79	1.34	(231, 732, 84)	7.72	2.73	0.88	97	6	1	fca-1	cortex	exp1	15			6.04273
2.73	93222	237	662	84	1.37	(232, 662, 87)	6.98	2.28	0.85	116	6	1	fca-1	cortex	exp1	15			5.93176
1.49	277250	228	444	84	1.37	(222, 449, 86)	6.43	1.37	1	3608	6	1	fca-1	cortex	exp1	15			5.06
0.97	557629	230	151	81	1.35	(221, 159, 94)	7.18	0.83	0.87	3610	6	1	fca-1	cortex	exp1	15			7.42287
1.41	155703	228	501	82	1.35	(225, 507, 91)	4.26	1.21	0.97	3634	6	1	fca-1	cortex	exp1	15			3.18175
3.66	81500	231	684	81	1.35	(228, 686, 89)	9.73	2.7	0.91	3664	6	1	fca-1	cortex	exp1	15			7.99231
0.96	435004	302	110	52	1.49	(291, 113, 30)	5.67	0.85	1	3666	7	1	fca-1	cortex	exp1	15			4.82
0.98	391012	303	197	52	1.49	(309, 196, 36)	5.97	0.86	1	3667	7	1	fca-1	cortex	exp1	15			5.11
1.39	508403	298	298	53	1.5	(300, 299, 45)	8.49	1.25	1	3668	7	1	fca-1	cortex	exp1	15			7.24
1.46	444214	301	397	54	1.48	(299, 396, 47)	8.21	1.31	1	3669	7	1	fca-1	cortex	exp1	15			6.9
1.46	196295	301	466	55	1.47	(300, 473, 57)	5.25	1.26	1	3670	7	1	fca-1	cortex	exp1	15			3.99
1.58	189839	302	508	55	1.47	(300, 505, 54)	5.25	1.39	1	3671	7	1	fca-1	cortex	exp1	15			3.86
1.85	202060	303	550	55	1.47	(304, 556, 55)	7.28	1.58	1	3672	7	1	fca-1	cortex	exp1	15			5.7
2.32	201159	305	595	56	1.48	(307, 598, 56)	9.15	1.98	1	3673	7	1	fca-1	cortex	exp1	15			7.17
2.36	111496	312	632	59	1.44	(309, 634, 55)	6.08	2.01	0.99	3674	7	1	fca-1	cortex	exp1	15			4.13141
2.57	126496	310	692	56	1.48	(308, 694, 54)	7.46	2.18	0.99	3678	7	1	fca-1	cortex	exp1	15			5.35535
2.69	133420	307	661	53	1.5	(303, 660, 55)	8.19	2.26	0.98	3686	7	1	fca-1	cortex	exp1	15			6.09714
2.73	177368	311	724	67	1.34	(309, 723, 57)	8.43	2.44	1	3690	7	1	fca-1	cortex	exp1	15			5.99
3.44	101892	311	753	56	1.48	(313, 755, 55)	9.58	2.81	0.99	3692	7	1	fca-1	cortex	exp1	15			6.86677
2.1	267264	120	638	61	1.63	(138, 637, 53)	8.67	1.97	1	24	1	2	fca-1	epidermis	exp1	15			6.7
2.51	230455	127	583	55	1.72	(142, 583, 51)	10.05	2.27	1	34	1	2	fca-1	epidermis	exp1	15			7.78
2.18	216385	137	293	51	1.77	(137, 298, 55)	6.69	2	1	38	1	2	fca-1	epidermis	exp1	15			4.69
2.23	166498	139	413	50	1.78	(137, 420, 52)	6.84	2	1	59	1	2	fca-1	epidermis	exp1	15			4.84
3.26	133071	135	729	51	1.77	(133, 734, 51)	10.53	2.79	1	80	1	2	fca-1	epidermis	exp1	15			7.74
2.61	121577	117	697	59	1.66	(133, 696, 51)	7.93	2.26	0.95	93	1	2	fca-1	epidermis	exp1	15			6.08737
3.58	78284	133	763	51	1.77	(136, 763, 53)	9.23	2.84	0.93	150	1	2	fca-1	epidermis	exp1	15			7.08473
3.27	75121	133	670	50	1.78	(135, 670, 52)	7.62	2.67	0.92	157	1	2	fca-1	epidermis	exp1	15			5.61261
3.78	70123	131	786	52	1.76	(131, 787, 55)	9.73	2.89	0.94	178	1	2	fca-1	epidermis	exp1	15			7.46106
1.3	225279	130	94	56	1.72	(136, 99, 58)	4.28	1.18	1	4120	1	2	fca-1	epidermis	exp1	15			3.1
1.71	196868	133	228	50	1.78	(142, 229, 57)	4.97	1.54	1	4127	1	2	fca-1	epidermis	exp1	15			3.43
1.51	201528	132	162	52	1.76	(141, 168, 59)	4.62	1.37	1	4131	1	2	fca-1	epidermis	exp1	15			3.25
2.25	210433	134	357	52	1.76	(141, 358, 54)	7.17	2.06	1	4132	1	2	fca-1	epidermis	exp1	15			5.11
2.16	205145	139	469	54	1.75	(144, 471, 56)	8.21	1.91	1	4134	1	2	fca-1	epidermis	exp1	15			6.3
2.56	181392	139	528	52	1.76	(140, 536, 51)	9.89	2.24	1	4136	1	2	fca-1	epidermis	exp1	15			7.65
2.43	107453	115	823	62	1.59	(135, 832, 59)	6.42	2.07	0.92	4139	1	2	fca-1	epidermis	exp1	15			4.90826
2.76	64453	131	809	54	1.75	(133, 810, 54)	5.47	2.31	0.82	4141	1	2	fca-1	epidermis	exp1	15			4.36073
1.65	172634	192	109	47	1.78	(193, 110, 44)	4.92	1.5	1	54	2	2	fca-1	epidermis	exp1	15			3.42
1.71	172186	191	67	51	1.77	(195, 70, 52)	5.05	1.55	1	55	2	2	fca-1	epidermis	exp1	15			3.5
2.15	159630	194	371	51	1.77	(197, 372, 43)	5.76	1.99	1	63	2	2	fca-1	epidermis	exp1	15			3.77
1.99	153718	195	403	47	1.78	(198, 404, 46)	5.58	1.83	0.99	65	2	2	fca-1	epidermis	exp1	15			3.80636
2.19	142447	197	489	48	1.76	(200, 489, 48)	5.85	1.96	1	73	2	2	fca-1	epidermis	exp1	15			3.89
2.38	137022	195	432	47	1.78	(199, 433, 44)	6.17	2.18	0.95	79	2	2	fca-1	epidermis	exp1	15			4.31474
2.41	130028	199	551	50	1.78	(203, 552, 49)	5.81	2.2	1	82	2	2	fca-1	epidermis	exp1	15			3.61
2.84	128763	198	459	47	1.78	(201, 460, 45)	8.01	2.51	0.99	83	2	2	fca-1	epidermis	exp1	15			5.58091
2.04	126123	196	281	46	1.77	(197, 282, 46)	5.59	1.8	0.98	87	2	2	fca-1	epidermis	exp1	15			3.90408
2.35	117496	198	579	50	1.78	(202, 582, 48)	5.54	2.14	0.99	99	2	2	fca-1	epidermis	exp1	15			3.45596
2.85	112038	197	890	40	1.74	(223, 893, 24)	6.38	2.57	0.93	108	2	2	fca-1	epidermis	exp1	15			4.29022
2.75	98309	192	604	53	1.75	(198, 607, 50)	6.05	2.52	0.87	120	2	2	fca-1	epidermis	exp1	15			4.43402
2.51	94875	196	626	48	1.76	(201, 627, 45)	5.31	2.27	0.82	123	2	2	fca-1	epidermis	exp1	15			4.20561
2.84	89753	188	712	44	1.77	(190, 713, 46)	5.88	2.51	0.81	131	2	2	fca-1	epidermis	exp1	15			4.74926
3.35	80619	191	748	47	1.78	(195, 748, 41)	6.65	2.88	0.79	145	2	2	fca-1	epidermis	exp1	15			5.53772
2.79	78055	195	661	47	1.78	(195, 662, 51)	5.37	2.4	0.78	152	2	2	fca-1	epidermis	exp1	15			4.48462
3.3	78012	190	679	49	1.78	(191, 679, 44)	6.21	2.91	0.71	153	2	2	fca-1	epidermis	exp1	15			5.83648
2.96	74048	176	904	49	1.78	(184, 906, 44)	5.47	2.56	0.73	161	2	2	fca-1	epidermis	exp1	15			4.93315
2.49	72669	186	871	50	1.78	(187, 872, 50)	4.46	2.16	0.76	165	2	2	fca-1	epidermis	exp1	15			3.70842
2.85	72330	193	695	48	1.76	(197, 696, 46)	4.92	2.51	0.69	167	2	2	fca-1	epidermis	exp1	15			4.62043
2.18	72328	195	645	49	1.78	(196, 645, 43)	3.33	2	0.66	168	2	2	fca-1	epidermis	exp1	15			3.04545
3.27	71340	190	766	48	1.76	(194, 767, 51)	5.93	2.83	0.74	172	2	2	fca-1	epidermis	exp1	15			5.18351
2.6	71148	184	853	46	1.77	(187, 854, 47)	4.52	2.25	0.72	175	2	2	fca-1	epidermis	exp1	15			4.02778
3.18	70458	185	835	46	1.77	(185, 836, 44)	5.57	2.81	0.78	176	2	2	fca-1	epidermis	exp1	15			4.33103
2.72	60856	187	797	43	1.77	(192, 798, 44)	4.25	2.32	0.72	192	2	2	fca-1	epidermis	exp1	15			3.58278
2.59	58470	188	783	48	1.76	(196, 783, 43)	3.76	2.3	0.65	197	2	2	fca-1	epidermis	exp1	15			3.48462
3.6	54920	188	729	42	1.76	(189, 731, 41)	5.8	2.94	0.69	206	2	2	fca-1	epidermis	exp1	15			5.4658
2.36	170687	191	216	50	1.78	(196, 217, 44)	7.69	2.18	1	4126	2	2	fca-1	epidermis	exp1	15			5.51
2.6	140960	197	520	47	1.78	(199, 522, 49)	7.96	2.26	1	4138	2	2	fca-1	epidermis	exp1	15			5.7
2.2	140127	195	312	48	1.76	(197, 311, 47)	6.14	1.99	1	4142	2	2	fca-1	epidermis	exp1	15			4.15
1.83	133402	194	340	50	1.78	(199, 342, 42)	4.16	1.71	0.98	4143	2	2	fca-1	epidermis	exp1	15			2.5349
1.85	176191	186	145	50	1.78	(191, 148, 44)	5.21	1.75	1	4163	2	2	fca-1	epidermis	exp1	15			3.46
1.83	155763	188	182	52	1.76	(193, 183, 48)	4.69	1.73	1	4164	2	2	fca-1	epidermis	exp1	15			2.96
2.01	157975	188	252	53	1.75	(195, 250, 45)	5.75	1.93	1	4169	2	2	fca-1	epidermis	exp1	15			3.82
2.76	78578	186	816	44	1.77	(191, 817, 46)	5.26	2.43	0.83	4178	2	2	fca-1	epidermis	exp1	15			3.90735
1.16	198415	285	194	64	1.56	(285, 195, 66)	3.68	1.05	1	4	3	2	fca-1	cortex	exp1	15			2.63
1.36	225778	280	239	65	1.53	(287, 242, 68)	4.41	1.26	0.98	7	3	2	fca-1	cortex	exp1	15			3.24
1.57	66759	272	628	68	1.49	(278, 630, 73)	2.47	1.46	0.67	9	3	2	fca-1	cortex	exp1	15			2.22657
1.75	76086	266	711	69	1.45	(271, 712, 76)	3.76	1.55	0.52	19	3	2	fca-1	cortex	exp1	15			5.68077
1.64	77957	272	655	72	1.39	(271, 656, 76)	3.69	1.47	0.53	35	3	2	fca-1	cortex	exp1	15			5.49226
1.43	87167	281	443	69	1.45	(279, 444, 73)	3	1.3	0.71	42	3	2	fca-1	cortex	exp1	15			2.92535
1.27	199562	281	152	66	1.52	(282, 151, 65)	4.19	1.16	1	46	3	2	fca-1	cortex	exp1	15			3.03
1.7	174450	281	327	65	1.53	(283, 327, 66)	5.44	1.5	1	52	3	2	fca-1	cortex	exp1	15			3.94
1.55	115980	282	363	66	1.52	(288, 366, 72)	4.21	1.36	0.79	101	3	2	fca-1	cortex	exp1	15			3.96911
1.47	106916	284	392	68	1.49	(284, 392, 66)	3.67	1.28	0.97	111	3	2	fca-1	cortex	exp1	15			2.50351
1.58	92016	275	417	65	1.53	(277, 418, 70)	3.6	1.34	0.83	129	3	2	fca-1	cortex	exp1	15			2.99735
1.76	88106	279	545	69	1.45	(279, 546, 74)	4.15	1.54	0.67	133	3	2	fca-1	cortex	exp1	15			4.65403
2.03	87242	274	469	69	1.45	(282, 470, 73)	5.29	1.68	0.7	135	3	2	fca-1	cortex	exp1	15			5.87714
1.72	85961	277	495	68	1.49	(278, 495, 74)	4	1.5	0.65	136	3	2	fca-1	cortex	exp1	15			4.65385
1.56	81302	272	603	71	1.43	(276, 603, 76)	3.04	1.49	0.53	142	3	2	fca-1	cortex	exp1	15			4.24585
1.37	214403	284	106	66	1.52	(288, 107, 71)	5.38	1.22	0.87	4147	3	2	fca-1	cortex	exp1	15			4.96391
1.17	225105	282	59	66	1.52	(279, 61, 66)	4.12	1.08	1	4148	3	2	fca-1	cortex	exp1	15			3.04
1.38	209153	285	285	64	1.56	(288, 282, 66)	4.67	1.25	1	4152	3	2	fca-1	cortex	exp1	15			3.42
1.83	77712	273	519	69	1.45	(275, 521, 75)	4.02	1.61	0.54	4154	3	2	fca-1	cortex	exp1	15			5.83444
1.57	84617	280	575	71	1.43	(283, 576, 76)	3.35	1.47	0.53	4155	3	2	fca-1	cortex	exp1	15			4.85075
1.74	83411	268	683	69	1.45	(266, 685, 76)	3.7	1.62	0.52	4159	3	2	fca-1	cortex	exp1	15			5.49538
1.97	82805	260	737	68	1.49	(265, 738, 74)	4.54	1.68	0.66	4181	3	2	fca-1	cortex	exp1	15			5.19879
1.11	359451	375	86	50	1.78	(369, 80, 41)	2.93	1.08	1	12	4	2	fca-1	epidermis	exp1	15			1.85
1.11	321455	375	148	50	1.78	(412, 155, 76)	2.4	1.08	0.48	15	4	2	fca-1	epidermis	exp1	15			3.92
1.26	273658	374	263	50	1.78	(364, 259, 40)	3.28	1.18	1	22	4	2	fca-1	epidermis	exp1	15			2.1
1.27	209215	367	203	37	1.71	(368, 207, 37)	3.5	1.16	1	41	4	2	fca-1	epidermis	exp1	15			2.34
1.38	199666	364	309	40	1.74	(365, 311, 42)	3.84	1.25	1	45	4	2	fca-1	epidermis	exp1	15			2.59
1.68	90606	336	746	51	1.77	(332, 746, 51)	3	1.56	0.85	53	4	2	fca-1	epidermis	exp1	15			1.96941
1.52	126055	347	463	47	1.78	(346, 463, 45)	3.47	1.39	0.97	88	4	2	fca-1	epidermis	exp1	15			2.18732
1.61	124882	350	488	45	1.76	(349, 488, 41)	3.61	1.45	0.93	89	4	2	fca-1	epidermis	exp1	15			2.43172
1.19	115740	361	353	50	1.78	(360, 355, 48)	2.4	1.1	1	102	4	2	fca-1	epidermis	exp1	15			1.3
1.23	106150	357	382	38	1.7	(357, 387, 46)	2.52	1.1	0.99	113	4	2	fca-1	epidermis	exp1	15			1.44545
1.42	99302	346	617	46	1.77	(348, 618, 39)	2.6	1.3	0.84	117	4	2	fca-1	epidermis	exp1	15			1.79524
1.37	98930	349	533	47	1.78	(350, 533, 45)	2.36	1.26	0.83	118	4	2	fca-1	epidermis	exp1	15			1.58337
1.41	98919	340	408	36	1.7	(338, 409, 39)	2.99	1.24	0.99	119	4	2	fca-1	epidermis	exp1	15			1.7802
1.38	96883	348	577	47	1.78	(346, 576, 47)	2.38	1.28	0.88	121	4	2	fca-1	epidermis	exp1	15			1.42455
1.49	95886	346	554	47	1.78	(346, 555, 46)	2.57	1.38	0.86	122	4	2	fca-1	epidermis	exp1	15			1.60837
1.3	92913	335	783	50	1.78	(333, 782, 46)	1.77	1.19	0.79	125	4	2	fca-1	epidermis	exp1	15			1.05051
1.07	92841	348	435	39	1.73	(342, 437, 39)	1.5	1.01	0.93	126	4	2	fca-1	epidermis	exp1	15			0.602903
1.48	88628	341	674	52	1.76	(345, 676, 49)	2.22	1.35	0.73	132	4	2	fca-1	epidermis	exp1	15			1.6911
1.61	87696	344	597	44	1.77	(345, 598, 42)	3.15	1.41	0.84	134	4	2	fca-1	epidermis	exp1	15			2.34
1.24	83043	339	800	44	1.77	(334, 801, 52)	1.78	1.15	0.78	139	4	2	fca-1	epidermis	exp1	15			1.13205
1.5	81764	337	710	49	1.78	(332, 709, 47)	2.36	1.38	0.75	141	4	2	fca-1	epidermis	exp1	15			1.76667
1.29	77770	323	816	49	1.78	(318, 816, 46)	1.67	1.21	0.75	155	4	2	fca-1	epidermis	exp1	15			1.01667
1.38	74281	340	692	49	1.78	(338, 692, 45)	1.99	1.27	0.72	160	4	2	fca-1	epidermis	exp1	15			1.49389
1.61	73006	338	765	51	1.77	(333, 765, 49)	2.12	1.44	0.7	163	4	2	fca-1	epidermis	exp1	15			1.58857
1.18	69888	345	657	44	1.77	(348, 658, 43)	1.56	1.09	0.81	179	4	2	fca-1	epidermis	exp1	15			0.835926
1.24	67693	324	834	51	1.77	(321, 834, 52)	1.62	1.14	0.72	181	4	2	fca-1	epidermis	exp1	15			1.11
1.54	96715	343	638	51	1.77	(347, 638, 50)	2.93	1.43	0.82	4157	4	2	fca-1	epidermis	exp1	15			2.14317
1.64	71079	340	727	50	1.78	(341, 728, 48)	2.52	1.47	0.74	4161	4	2	fca-1	epidermis	exp1	15			1.93541
1.59	105025	345	511	46	1.77	(345, 512, 43)	3.12	1.44	0.87	4180	4	2	fca-1	epidermis	exp1	15			2.14621
1.84	178959	231	159	21	1.47	(239, 167, 17)	6.66	1.58	0.95	26	5	2	fca-1	epidermis	exp1	15			5.43053
2.1	155854	236	239	19	1.46	(242, 241, 17)	6.92	1.8	0.95	39	5	2	fca-1	epidermis	exp1	15			5.48421
2.34	183209	231	71	19	1.46	(235, 73, 21)	8.77	1.98	1	50	5	2	fca-1	epidermis	exp1	15			6.79
2.74	148584	242	372	20	1.47	(246, 376, 20)	8.69	2.32	1	69	5	2	fca-1	epidermis	exp1	15			6.37
3.84	57156	239	674	22	1.5	(242, 677, 22)	7.82	3	0.94	77	5	2	fca-1	epidermis	exp1	15			5.31915
4.3	53410	229	816	23	1.52	(230, 817, 23)	9.51	3.12	0.94	81	5	2	fca-1	epidermis	exp1	15			6.99702
2.45	120656	244	486	19	1.46	(244, 486, 21)	7.72	1.99	1	94	5	2	fca-1	epidermis	exp1	15			5.73
3.14	108998	244	434	20	1.47	(245, 439, 20)	9.91	2.49	1	109	5	2	fca-1	epidermis	exp1	15			7.42
4.28	60258	235	735	21	1.47	(238, 736, 19)	10.68	3.06	1	195	5	2	fca-1	epidermis	exp1	15			7.62
5.84	54302	233	789	21	1.47	(233, 793, 20)	12.58	4.29	0.9	209	5	2	fca-1	epidermis	exp1	15			9.68778
6.23	51235	236	765	21	1.47	(238, 764, 21)	13.28	4.57	0.97	214	5	2	fca-1	epidermis	exp1	15			9.12072
4.08	45423	227	841	20	1.47	(228, 841, 21)	8.41	2.86	0.93	220	5	2	fca-1	epidermis	exp1	15			6.18301
2.63	131460	238	308	18	1.44	(242, 321, 17)	7.72	2.23	1	4150	5	2	fca-1	epidermis	exp1	15			5.49
3.34	127218	243	546	23	1.52	(247, 554, 28)	11.45	2.68	1	4167	5	2	fca-1	epidermis	exp1	15			8.77
4.18	131510	242	602	23	1.52	(244, 602, 23)	15.73	3.27	1	4170	5	2	fca-1	epidermis	exp1	15			12.46
3.57	66390	243	646	25	1.55	(241, 643, 22)	7.79	2.84	0.96	4174	5	2	fca-1	epidermis	exp1	15			5.27458
3.65	65890	240	705	24	1.52	(242, 706, 23)	8.59	2.8	0.99	4175	5	2	fca-1	epidermis	exp1	15			5.87677
1.59	104002	275	110	23	1.52	(279, 111, 26)	3.38	1.4	0.99	16	6	2	fca-1	epidermis	exp1	15			2.01414
2.21	106980	292	513	22	1.5	(293, 518, 24)	6.09	1.83	1	48	6	2	fca-1	epidermis	exp1	15			4.26
2.06	104902	290	390	19	1.46	(289, 396, 19)	5.07	1.75	1	114	6	2	fca-1	epidermis	exp1	15			3.32
2.51	65257	282	322	18	1.44	(284, 323, 18)	5.48	2	0.99	184	6	2	fca-1	epidermis	exp1	15			3.53535
1.52	88701	279	182	19	1.46	(278, 185, 20)	2.99	1.34	0.99	4146	6	2	fca-1	epidermis	exp1	15			1.6802
2.07	121655	294	451	21	1.47	(295, 457, 21)	5.29	1.8	1	4153	6	2	fca-1	epidermis	exp1	15			3.49
1.83	94629	280	256	18	1.44	(282, 261, 18)	4.26	1.55	1	4166	6	2	fca-1	epidermis	exp1	15			2.71
2.02	99792	291	571	26	1.57	(293, 574, 29)	5.19	1.68	1	4168	6	2	fca-1	epidermis	exp1	15			3.51
2.14	98182	290	627	25	1.55	(290, 633, 30)	5.17	1.82	1	4171	6	2	fca-1	epidermis	exp1	15			3.35
2.27	81199	286	679	27	1.57	(288, 678, 26)	5.76	1.8	1	4173	6	2	fca-1	epidermis	exp1	15			3.96
2.02	82138	284	727	27	1.57	(283, 731, 26)	4.22	1.73	1	4176	6	2	fca-1	epidermis	exp1	15			2.49
1.45	243544	314	107	21	1.47	(311, 113, 22)	5.35	1.29	1	5	7	2	fca-1	epidermis	exp1	15			4.06
1.61	172148	321	335	20	1.47	(322, 337, 25)	4.19	1.46	1	56	7	2	fca-1	epidermis	exp1	15			2.73
1.54	220030	321	231	20	1.47	(318, 242, 24)	4.93	1.39	1	4145	7	2	fca-1	epidermis	exp1	15			3.54
2.11	310552	421	154	32	1.65	(415, 152, 39)	8.87	1.89	1	18	8	2	fca-1	epidermis	exp1	15			6.98
1.97	230587	413	367	38	1.7	(408, 376, 43)	6.82	1.76	1	33	8	2	fca-1	epidermis	exp1	15			5.06
2.25	144153	419	242	33	1.66	(418, 251, 39)	6.59	1.94	1	71	8	2	fca-1	epidermis	exp1	15			4.65
2.46	127917	418	298	34	1.66	(414, 304, 40)	7.06	2.09	1	85	8	2	fca-1	epidermis	exp1	15			4.97
3.02	123659	404	558	44	1.77	(402, 559, 46)	9.73	2.5	1	91	8	2	fca-1	epidermis	exp1	15			7.23
2.96	119886	407	474	38	1.7	(404, 477, 43)	9.9	2.36	1	96	8	2	fca-1	epidermis	exp1	15			7.54
2.57	119064	402	602	47	1.78	(403, 603, 43)	7.69	2.19	1	97	8	2	fca-1	epidermis	exp1	15			5.5
[truncated: 19,751 more rows]

## Sheet: Venus_rep1_rep2_results
cell_voxels	sphere_fit_centroid	X_sphere	Y_sphere	Z_sphere	segmented_cell_centroid	X	Y	Z	z_mean	mean_intensity	mean_in_sphere	mean_outside_sphere	overlap_fraction	region_id	root	genotype	file_id	rank	sphere_filled	tissue	State	rep
34415	(106, 194, 73)	106	194	73	(108, 200, 67)	108	200	67			4.899	5.226	0.764	155	2	fca3	1	0	1.1863	epidermis	off	1
27183	(101, 235, 68)	101	235	68	(107, 238, 65)	107	238	65			4.801	5.216	0.907	309	2	fca3	1	1	0.0772745	epidermis	off	1
34892	(109, 282, 63)	109	282	63	(109, 283, 63)	109	283	63			5.331	5.275	0.932	151	2	fca3	1	2	0.444957	epidermis	off	1
45389	(112, 336, 55)	112	336	55	(109, 327, 60)	109	327	60			5.151	5.165	0.993	601	2	fca3	1	3	0.0223112	epidermis	off	1
37558	(113, 387, 49)	113	387	49	(111, 378, 56)	111	378	56			5.113	5.33	0.948	1359	2	fca3	1	4	0.0634599	epidermis	off	1
33148	(101, 414, 59)	101	414	59	(109, 417, 56)	109	417	56			5.302	5.376	0.901	170	2	fca3	1	5	0.508573	epidermis	off	1
73045	(115, 483, 56)	115	483	56	(107, 480, 56)	107	480	56			5.191	5.145	0.892	120	2	fca3	1	6	0.674507	epidermis	off	1
73911	(111, 561, 48)	111	561	48	(106, 560, 53)	106	560	53			5.124	5.182	0.913	142	2	fca3	1	7	0.430267	epidermis	off	1
77426	(103, 650, 50)	103	650	50	(99, 653, 52)	99	653	52			5.093	5.093	1	2007	2	fca3	1	8	0	epidermis	off	1
83624	(101, 730, 49)	101	730	49	(92, 750, 52)	92	750	52			5.142	5.041	0.93	35	2	fca3	1	9	0.488032	epidermis	off	1
121236	(93, 868, 46)	93	868	46	(83, 874, 51)	83	874	51			4.922	4.955	0.961	83	2	fca3	1	10	0.166748	epidermis	off	1
76176	(85, 995, 47)	85	995	47	(75, 975, 54)	75	975	54			4.763	4.931	0.931	87	2	fca3	1	11	0.185004	epidermis	off	1
15049	(98, 346, 77)	98	346	77	(99, 350, 72)	99	350	72			3.755	5.376	0.335	403	2	fca3	2	0	5.83296			1
17508	(98, 376, 77)	98	376	77	(98, 385, 71)	98	385	71			3.63	5.143	0.281	542	2	fca3	2	1	7.77515			1
36135	(93, 433, 77)	93	433	77	(90, 426, 75)	90	426	75			3.976	5.23	0.332	282	2	fca3	2	2	6.7459			1
36652	(85, 506, 77)	85	506	77	(85, 495, 74)	85	495	74			4.124	5.097	0.35	115	2	fca3	2	3	6.68586			1
23607	(85, 545, 77)	85	545	77	(85, 548, 72)	85	548	72			4.58	5.125	0.438	446	2	fca3	2	4	5.33162			1
27117	(80, 583, 77)	80	583	77	(80, 588, 71)	80	588	71			4.692	5.122	0.459	476	2	fca3	2	5	5.10022			1
70819	(77, 638, 77)	77	638	77	(73, 658, 71)	73	658	71			4.645	4.922	0.458	205	2	fca3	2	6	5.21992			1
70104	(70, 745, 77)	70	745	77	(65, 749, 72)	65	749	72			4.783	4.926	0.484	126	2	fca3	2	7	4.95623			1
50545	(62, 833, 77)	62	833	77	(58, 835, 74)	58	835	74			4.578	5.069	0.451	105	2	fca3	2	8	5.08178			1
53775	(55, 896, 77)	55	896	77	(50, 921, 74)	50	921	74			4.266	4.995	0.407	178	2	fca3	2	9	5.48657			1
34420	(45, 1008, 77)	45	1008	77	(45, 991, 74)	45	991	74			4.083	4.986	0.207	348	2	fca3	2	10	14.7386			1
31759	(147, 222, 49)	147	222	49	(150, 218, 52)	150	218	52			4.58	5.388	0.81	171	2	fca3	3	0	0.266321	epidermis	off	1
32000	(154, 259, 49)	154	259	49	(152, 259, 48)	152	259	48			5.366	5.503	0.926	159	2	fca3	3	1	0.291816	epidermis	off	1
36444	(145, 299, 47)	145	299	47	(153, 299, 47)	153	299	47			5.215	5.305	0.992	72	2	fca3	3	2	-0.0479435	epidermis	off	1
26867	(160, 336, 48)	160	336	48	(156, 339, 45)	156	339	45			4.459	5.383	0.83	243	2	fca3	3	3	-0.0107108	epidermis	off	1
35741	(149, 376, 43)	149	376	43	(158, 375, 43)	158	375	43			4.788	5.321	0.908	100	2	fca3	3	4	-0.0478722	epidermis	off	1
42551	(149, 416, 43)	149	416	43	(158, 416, 43)	158	416	43			5.266	5.418	0.933	110	2	fca3	3	5	0.226159	epidermis	off	1
43658	(145, 451, 47)	145	451	47	(157, 457, 42)	157	457	42			5.357	5.478	0.98	54	2	fca3	3	6	-0.0116735	epidermis	off	1
45590	(147, 504, 40)	147	504	40	(157, 502, 41)	157	502	41			5.336	5.359	0.988	96	2	fca3	3	7	0.0418097	epidermis	off	1
41634	(162, 554, 35)	162	554	35	(158, 549, 39)	158	549	39			5.065	5.384	0.909	141	2	fca3	3	8	0.188057	epidermis	off	1
56047	(161, 612, 36)	161	612	36	(154, 598, 40)	154	598	40			5.288	5.298	0.924	307	2	fca3	3	9	0.424944	epidermis	off	1
69557	(156, 657, 36)	156	657	36	(149, 663, 38)	149	663	38			5.411	5.362	0.937	208	2	fca3	3	10	0.412813	epidermis	off	1
60950	(153, 743, 31)	153	743	31	(146, 728, 37)	146	728	37			5.318	5.341	0.995	41	2	fca3	3	11	0.00372362	epidermis	off	1
75808	(150, 811, 30)	150	811	30	(143, 791, 37)	143	791	37			5.193	5.182	0.976	90	2	fca3	3	12	0.138697	epidermis	off	1
96227	(150, 870, 28)	150	870	28	(141, 868, 35)	141	868	35			5.218	5.165	0.999	23	2	fca3	3	13	0.0582232	epidermis	off	1
100006	(144, 952, 31)	144	952	31	(136, 953, 37)	136	953	37			5.108	5.088	0.932	46	2	fca3	3	14	0.392687	epidermis	off	1
23318	(121, 1008, 42)	121	1008	42	(124, 999, 44)	124	999	44			4.724	5.333	0.42	349	2	fca3	3	15	5.91462			1
27250	(186, 129, 41)	186	129	41	(182, 128, 41)	182	128	41			5.174	5.467	0.909	227	2	fca3	4	0	0.224969	epidermis	off	1
26925	(187, 179, 39)	187	179	39	(184, 180, 39)	184	180	39			5.234	5.44	0.921	284	2	fca3	4	1	0.242953	epidermis	off	1
35064	(189, 237, 37)	189	237	37	(188, 240, 37)	188	240	37			6.064	5.774	0.97	92	2	fca3	4	2	0.477546	epidermis	on	1
25431	(193, 300, 32)	193	300	32	(193, 304, 31)	193	304	31			5.788	5.713	0.939	244	2	fca3	4	3	0.451004	epidermis	on	1
30968	(198, 361, 29)	198	361	29	(198, 353, 32)	198	353	32			5.518	5.597	0.993	94	2	fca3	4	4	-0.0401017	epidermis	off	1
33351	(199, 414, 27)	199	414	27	(201, 409, 29)	201	409	29			5.335	5.62	0.943	218	2	fca3	4	5	0.0374761	epidermis	off	1
33896	(202, 474, 26)	202	474	26	(204, 473, 26)	204	473	26			5.92	5.646	0.993	2011	2	fca3	4	6	0.315732	epidermis	on	1
36630	(206, 533, 24)	206	533	24	(202, 536, 24)	202	536	24			5.3	5.396	0.923	370	2	fca3	4	7	0.346145	epidermis	off	1
72148	(198, 624, 23)	198	624	23	(200, 627, 21)	200	627	21			6.591	5.453	0.898	231	2	fca3	4	8	1.88664	epidermis	on	1
118136	(198, 778, 18)	198	778	18	(194, 779, 18)	194	779	18			5.91	5.274	0.977	68	2	fca3	4	9	0.77513	epidermis	on	1
105318	(190, 964, 21)	190	964	21	(189, 945, 19)	189	945	19			6.104	5.093	0.925	73	2	fca3	4	10	1.50592	epidermis	on	1
13221	(220, 153, 43)	220	153	43	(220, 155, 42)	220	155	42			4.302	5.567	0.777	270	2	fca3	5	0	-0.0303205	epidermis	might be on	1
14593	(223, 183, 43)	223	183	43	(225, 186, 41)	225	186	41			4.048	5.494	0.724	375	2	fca3	5	1	0.0971602	epidermis	might be on	1
28471	(225, 233, 38)	225	233	38	(225, 233, 39)	225	233	39			5.155	5.535	0.903	298	2	fca3	5	2	0.173749	epidermis	off	1
23627	(232, 307, 36)	232	307	36	(233, 303, 35)	233	303	35			5.276	5.65	0.888	341	2	fca3	5	3	0.291441	epidermis	off	1
17597	(237, 368, 33)	237	368	33	(239, 367, 32)	239	367	32			4.515	5.552	0.785	385	2	fca3	5	4	0.199592	epidermis	off	1
26688	(241, 444, 30)	241	444	30	(239, 437, 31)	239	437	31			5.404	5.8	0.865	232	2	fca3	5	5	0.447399	epidermis	on	1
37596	(241, 512, 29)	241	512	29	(240, 516, 29)	240	516	29			5.318	5.534	0.836	225	2	fca3	5	6	0.827244	epidermis	on	1
38574	(241, 580, 26)	241	580	26	(241, 596, 24)	241	596	24			5.212	5.427	0.92	345	2	fca3	5	7	0.238217	epidermis	off	1
42917	(237, 691, 22)	237	691	22	(240, 680, 22)	240	680	22			4.838	5.247	0.845	175	2	fca3	5	8	0.478444	epidermis	off	1
123239	(233, 838, 21)	233	838	21	(234, 843, 21)	234	843	21			5.159	5.095	0.945	108	2	fca3	5	9	0.364259	epidermis	off	1
47254	(224, 1002, 26)	224	1002	26	(227, 983, 23)	227	983	23			4.731	4.886	0.756	145	2	fca3	5	10	1.37194	epidermis	off	1
19325	(259, 182, 64)	259	182	64	(254, 188, 57)	254	188	57			3.387	5.29	0.621	308	2	fca3	6	0	0.164106	epidermis	off	1
16443	(257, 202, 61)	257	202	61	(254, 207, 55)	254	207	55			3.311	5.293	0.622	437	2	fca3	6	1	0.0301511	epidermis	off	1
27494	(263, 239, 53)	263	239	53	(259, 236, 55)	259	236	55			5.643	5.533	0.967	185	2	fca3	6	2	0.302574	epidermis	off	1
41522	(268, 281, 52)	268	281	52	(259, 279, 54)	259	279	54			5.48	5.42	0.947	274	2	fca3	6	3	0.366695	epidermis	off	1
35680	(268, 324, 50)	268	324	50	(261, 325, 51)	261	325	51			5.615	5.494	0.995	121	2	fca3	6	4	0.149216	epidermis	off	1
37248	(273, 371, 48)	273	371	48	(264, 368, 50)	264	368	50			5.468	5.418	0.945	195	2	fca3	6	5	0.368243	epidermis	off	1
37029	(275, 416, 46)	275	416	46	(266, 413, 48)	266	413	48			5.419	5.45	0.98	84	2	fca3	6	6	0.0795918	epidermis	off	1
34246	(271, 458, 46)	271	458	46	(265, 459, 46)	265	459	46			5.994	5.694	0.989	149	2	fca3	6	7	0.366667	epidermis	on	1
35121	(273, 509, 44)	273	509	44	(265, 504, 45)	265	504	45			5.336	5.421	0.908	346	2	fca3	6	8	0.455652	epidermis	off	1
35012	(271, 552, 44)	271	552	44	(265, 552, 45)	265	552	45			5.258	5.33	0.906	357	2	fca3	6	9	0.473532	epidermis	off	1
39701	(269, 609, 40)	269	609	40	(264, 600, 43)	264	600	43			5.44	5.388	0.954	152	2	fca3	6	10	0.314306	epidermis	off	1
50027	(267, 666, 39)	267	666	39	(261, 657, 42)	261	657	42			5.437	5.382	0.934	256	2	fca3	6	11	0.439199	epidermis	off	1
51821	(267, 731, 37)	267	731	37	(259, 717, 40)	259	717	40			5.39	5.373	0.979	111	2	fca3	6	12	0.132618	epidermis	off	1
51544	(265, 776, 39)	265	776	39	(258, 779, 40)	258	779	40			5.412	5.304	0.943	143	2	fca3	6	13	0.43513	epidermis	off	1
56567	(260, 830, 39)	260	830	39	(253, 841, 40)	253	841	40			5.113	5.145	0.943	210	2	fca3	6	14	0.277057	epidermis	off	1
86908	(241, 903, 46)	241	903	46	(245, 930, 43)	245	930	43			5.022	5.089	0.912	132	2	fca3	6	15	0.417579	epidermis	off	1
31862	(232, 1000, 49)	232	1000	49	(237, 996, 47)	237	996	47			4.931	5.106	0.851	116	2	fca3	6	16	0.68836	epidermis	off	1
31981	(290, 118, 65)	290	118	65	(293, 118, 66)	293	118	66			5.967	5.517	0.913	294	2	fca3	7	0	1.0186	epidermis	on	1
18602	(299, 161, 68)	299	161	68	(297, 162, 66)	297	162	66			4.706	5.405	0.863	235	2	fca3	7	1	0.0480707	epidermis	off	1
17765	(299, 191, 67)	299	191	67	(296, 191, 66)	296	191	66			4.469	5.354	0.779	509	2	fca3	7	2	0.382842	epidermis	off	1
28920	(295, 230, 65)	295	230	65	(296, 235, 65)	296	235	65			6.212	5.551	0.939	333	2	fca3	7	3	1.06455	epidermis	on	1
26323	(302, 361, 61)	302	361	61	(302, 349, 62)	302	349	62			4.924	5.265	0.87	265	2	fca3	7	4	0.39477	epidermis	off	1
40392	(306, 422, 59)	306	422	59	(305, 425, 59)	305	425	59			5.238	5.332	0.856	434	2	fca3	7	5	0.787159	epidermis	off	1
43287	(301, 501, 56)	301	501	56	(300, 521, 56)	300	521	56			4.722	5.252	0.81	197	2	fca3	7	6	0.57763	epidermis	off	1
49989	(299, 618, 50)	299	618	50	(298, 627, 50)	298	627	50			5.175	5.231	0.887	91	2	fca3	7	7	0.603273	epidermis	off	1
54458	(299, 709, 47)	299	709	47	(297, 730, 48)	297	730	48			5.124	5.194	0.926	112	2	fca3	7	8	0.339477	epidermis	off	1
69558	(294, 804, 49)	294	804	49	(286, 853, 50)	286	853	50			4.76	4.984	0.917	109	2	fca3	7	9	0.20684	epidermis	off	1
71346	(272, 964, 57)	272	964	57	(274, 962, 55)	274	962	55			4.704	4.914	0.878	60	2	fca3	7	10	0.443631	epidermis	off	1
19919	(147, 168, 77)	147	168	77	(152, 171, 73)	152	171	73			3.654	5.05	0.348	267	2	fca3	8	0	5.45			1
34431	(159, 199, 77)	159	199	77	(155, 202, 73)	155	202	73			4.692	5.043	0.484	123	2	fca3	8	1	4.65121			1
49416	(153, 243, 76)	153	243	76	(151, 249, 70)	151	249	70			5.132	5.127	0.609	79	2	fca3	8	2	3.29993	cortex	on	1
54471	(149, 290, 72)	149	290	72	(155, 292, 70)	155	292	70			5.524	5.09	0.823	148	2	fca3	8	3	1.62203	cortex	on	1
78781	(171, 348, 68)	171	348	68	(156, 343, 68)	156	343	68			4.942	4.995	0.966	2012	2	fca3	8	4	0.120942	cortex	off	1
72051	(149, 385, 71)	149	385	71	(155, 389, 68)	155	389	68			5.116	5.015	0.892	80	2	fca3	8	5	0.720426	cortex	off	1
73242	(136, 437, 68)	136	437	68	(144, 441, 67)	144	441	67			4.946	4.928	0.981	56	2	fca3	8	6	0.113794	cortex	off	1
99594	(135, 493, 71)	135	493	71	(147, 498, 68)	147	498	68			4.89	4.917	0.853	133	2	fca3	8	7	0.815708	cortex	off	1
77150	(139, 553, 67)	139	553	67	(145, 550, 68)	145	550	68			4.894	4.891	0.998	75	2	fca3	8	8	0.0128076	cortex	off	1
93421	(130, 602, 68)	130	602	68	(139, 597, 67)	139	597	67			5.028	4.899	0.959	97	2	fca3	8	9	0.343961	cortex	off	1
201842	(129, 668, 66)	129	668	66	(137, 673, 66)	137	673	66			5.232	4.924	0.935	62	2	fca3	8	10	0.671722	cortex	mght be on	1
267372	(103, 789, 69)	103	789	69	(126, 789, 65)	126	789	65			4.864	4.8	0.906	29	2	fca3	8	11	0.568653	cortex	off	1
230952	(126, 904, 67)	126	904	67	(118, 913, 66)	118	913	66			4.908	4.737	0.964	52	2	fca3	8	12	0.354286	cortex	off	1
72293	(119, 1002, 77)	119	1002	77	(107, 995, 68)	107	995	68			4.72	4.791	0.384	127	2	fca3	8	13	7.50067			1
51288	(208, 197, 68)	208	197	68	(204, 199, 65)	204	199	65			5.063	5.105	0.912	222	2	fca3	9	0	0.446535	cortex	off	1
47178	(208, 236, 63)	208	236	63	(210, 235, 63)	210	235	63			6.46	5.543	0.871	229	2	fca3	9	1	1.87376	cortex	on	1
40732	(208, 268, 63)	208	268	63	(208, 270, 61)	208	270	61			5.129	5.275	0.916	187	2	fca3	9	2	0.324345	cortex	off	1
55485	(213, 315, 59)	213	315	59	(210, 308, 62)	210	308	62			6.561	5.411	0.951	166	2	fca3	9	3	1.48805	cortex	on	1
78443	(215, 364, 56)	215	364	56	(211, 358, 60)	211	358	60			7.583	5.516	0.959	39	2	fca3	9	4	2.39119	cortex	on	1
61920	(214, 411, 54)	214	411	54	(214, 407, 57)	214	407	57			6.782	5.41	0.958	117	2	fca3	9	5	1.66933	cortex	on	1
46901	(205, 450, 57)	205	450	57	(209, 450, 56)	209	450	56			6.343	5.347	0.927	124	2	fca3	9	6	1.4955	cortex	on	1
77139	(214, 500, 50)	214	500	50	(210, 503, 53)	210	503	53			5.2	5.043	0.999	34	2	fca3	9	7	0.162205	cortex	off	1
61763	(209, 559, 47)	209	559	47	(206, 555, 51)	206	555	51			5.546	5.123	0.936	130	2	fca3	9	8	0.802214	cortex	on	1
56472	(208, 608, 50)	208	608	50	(208, 607, 48)	208	607	48			5.669	5.117	0.959	82	2	fca3	9	9	0.794366	cortex	on	1
74589	(210, 655, 45)	210	655	45	(204, 654, 49)	204	654	49			6.427	5.096	0.957	53	2	fca3	9	10	1.61978	cortex	on	1
88103	(205, 722, 47)	205	722	47	(199, 722, 46)	199	722	46			7.362	5.251	1	2008	2	fca3	9	11	2.111	cortex	on	1
95515	(196, 785, 48)	196	785	48	(196, 795, 46)	196	795	46			5.684	4.993	0.998	28	2	fca3	9	12	0.702391	cortex	on	1
96113	(195, 869, 47)	195	869	47	(193, 869, 46)	193	869	46			6.462	5.009	0.923	67	2	fca3	9	13	1.99208	cortex	on	1
113305	(182, 941, 49)	182	941	49	(187, 951, 47)	187	951	47			5.798	4.953	0.99	18	2	fca3	9	14	0.903566	cortex	on	1
48099	(169, 1004, 61)	169	1004	61	(176, 1000, 57)	176	1000	57			4.876	5.2	0.679	113	2	fca3	9	15	1.98115	cortex	on	1
17304	(269, 217, 77)	269	217	77	(261, 219, 73)	261	219	73			4.039	5.109	0.318	414	2	fca3	10	0	7.59226			1
25576	(269, 245, 77)	269	245	77	(259, 247, 73)	259	247	73			4.524	5.16	0.407	188	2	fca3	10	1	5.95548			1
17798	(263, 275, 77)	263	275	77	(257, 278, 73)	257	278	73			4.556	5.187	0.394	583	2	fca3	10	2	6.37645			1
25952	(272, 307, 77)	272	307	77	(267, 307, 73)	267	307	73			5.102	5.096	0.461	165	2	fca3	10	3	5.97125			1
35133	(272, 342, 77)	272	342	77	(264, 346, 72)	264	346	72			4.862	5.002	0.508	102	2	fca3	10	4	4.56887			1
50314	(273, 379, 77)	273	379	77	(264, 383, 71)	264	383	71			5.863	5.211	0.537	81	2	fca3	10	5	5.70706			1
44526	(268, 420, 75)	268	420	75	(262, 425, 68)	262	425	68			6.795	5.481	0.641	182	2	fca3	10	6	5.11962	cortex	on	1
39677	(249, 449, 77)	249	449	77	(259, 454, 70)	259	454	70			4.789	5.14	0.486	114	2	fca3	10	7	4.71391			1
53245	(263, 485, 74)	263	485	74	(258, 487, 69)	258	487	69			5.312	5.048	0.722	255	2	fca3	10	8	2.30934	cortex	might be on	1
54764	(264, 525, 70)	264	525	70	(261, 528, 68)	261	528	68			5.1	4.996	0.945	88	2	fca3	10	9	0.400825	cortex	off	1
133515	(274, 590, 70)	274	590	70	(259, 588, 68)	259	588	68			5.363	4.984	0.952	20	2	fca3	10	10	0.649403	cortex	might be on	1
164422	(259, 676, 72)	259	676	72	(251, 680, 67)	251	680	67			6.193	4.98	0.831	32	2	fca3	10	11	2.47247	cortex	on	1
170649	(240, 771, 77)	240	771	77	(246, 778, 67)	246	778	67			5.25	4.823	0.519	22	2	fca3	10	12	5.29261			1
195925	(232, 875, 72)	232	875	72	(233, 887, 67)	233	887	67			5.161	4.8	0.824	33	2	fca3	10	13	1.46335	cortex	on	1
99852	(217, 1002, 77)	217	1002	77	(225, 980, 69)	225	980	69			5.189	4.725	0.399	38	2	fca3	10	14	8.28001			1
20661	(310, 210, 77)	310	210	77	(309, 210, 74)	309	210	74			3.73	5.456	0.259	318	2	fca3	11	0	8.94554			1
53343	(299, 296, 63)	299	296	63	(302, 286, 66)	302	286	66			5.278	5.329	0.881	399	2	fca3	11	1	0.661919	epidermis	off	1
36006	(314, 349, 77)	314	349	77	(314, 355, 74)	314	355	74			4.313	5.119	0.38	213	2	fca3	11	2	6.231			1
39425	(315, 449, 77)	315	449	77	(313, 445, 74)	313	445	74			4.601	5.176	0.401	212	2	fca3	11	3	6.29782			1
61616	(312, 529, 77)	312	529	77	(310, 551, 70)	310	551	70			4.967	5.075	0.485	202	2	fca3	11	4	5.16624			1
85484	(301, 643, 72)	301	643	72	(305, 661, 70)	305	661	70			4.998	5.024	0.812	63	2	fca3	11	5	1.13117	epidermis	off	1
46880	(296, 782, 72)	296	782	72	(297, 763, 69)	297	763	69			5.056	5.123	0.786	59	2	fca3	11	6	1.30957	epidermis	on	1
40829	(289, 811, 76)	289	811	76	(289, 828, 71)	289	828	71			4.805	5.148	0.569	99	2	fca3	11	7	3.29664	epidermis	off	1
75120	(281, 908, 77)	281	908	77	(282, 931, 72)	282	931	72			4.785	5.013	0.505	196	2	fca3	11	8	4.46225			1
22432	(294, 47, 56)	294	47	56	(296, 47, 56)	296	47	56			4.298	5.287	0.811	100	3	fca3	1	0	0.0126301	epidermis	off	1
24348	(292, 84, 58)	292	84	58	(287, 87, 55)	287	87	55			4.431	5.186	0.82	79	3	fca3	1	1	0.217659	epidermis	off	1
25664	(286, 126, 58)	286	126	58	(280, 127, 55)	280	127	55			4.727	5.286	0.833	89	3	fca3	1	2	0.38867	epidermis	off	1
26031	(286, 162, 60)	286	162	60	(275, 168, 54)	275	168	54			4.215	5.208	0.746	135	3	fca3	1	3	0.442134	epidermis	off	1
29796	(275, 207, 58)	275	207	58	(267, 210, 53)	267	210	53			4.805	5.184	0.873	85	3	fca3	1	4	0.320009	epidermis	off	1
28580	(259, 252, 51)	259	252	51	(259, 250, 51)	259	250	51			4.51	5.149	0.85	76	3	fca3	1	5	0.156882	epidermis	off	1
25489	(257, 287, 53)	257	287	53	(250, 291, 49)	250	291	49			4.64	5.24	0.848	171	3	fca3	1	6	0.231698	epidermis	off	1
28717	(247, 333, 48)	247	333	48	(246, 332, 47)	246	332	47			5.049	5.281	0.908	70	3	fca3	1	7	0.279573	epidermis	off	1
53981	(237, 392, 48)	237	392	48	(233, 400, 46)	233	400	46			5.247	5.178	0.887	38	3	fca3	1	8	0.737445	epidermis	on	1
56636	(224, 477, 47)	224	477	47	(220, 483, 46)	220	483	46			5.061	5.054	0.909	75	3	fca3	1	9	0.513657	epidermis	might be on	1
79538	(217, 573, 49)	217	573	49	(214, 582, 48)	214	582	48			5.318	5.032	0.913	36	3	fca3	1	10	0.792754	epidermis	on	1
103698	(211, 673, 53)	211	673	53	(203, 697, 50)	203	697	50			5.405	4.953	0.916	18	3	fca3	1	11	0.947655	epidermis	on	1
143966	(192, 877, 62)	192	877	62	(190, 871, 59)	190	871	59			4.72	4.741	0.929	39	3	fca3	1	12	0.339732	epidermis	off	1
19658	(291, 198, 41)	291	198	41	(288, 198, 39)	288	198	39			4.592	5.447	0.851	61	3	fca3	2	0	-0.0509953	epidermis	off	1
28396	(286, 240, 39)	286	240	39	(290, 241, 39)	290	241	39			4.746	5.386	0.895	51	3	fca3	2	1	-0.0832067	epidermis	off	1
35697	(282, 282, 39)	282	282	39	(281, 281, 39)	281	281	39			5.137	5.45	0.948	25	3	fca3	2	2	-0.0312236	epidermis	off	1
32395	(282, 324, 40)	282	324	40	(274, 327, 36)	274	327	36			5.245	5.47	0.925	43	3	fca3	2	3	0.20027	epidermis	off	1
42764	(270, 371, 35)	270	371	35	(269, 371, 35)	269	371	35			5.126	5.427	0.916	28	3	fca3	2	4	0.16907	epidermis	off	1
38167	(266, 411, 37)	266	411	37	(263, 412, 36)	263	412	36			5.332	5.592	0.849	47	3	fca3	2	5	0.68833	epidermis	on	1
44874	(260, 453, 36)	260	453	36	(256, 456, 34)	256	456	34			4.841	5.281	0.894	32	3	fca3	2	6	0.133989	epidermis	off	1
48954	(258, 496, 38)	258	496	38	(255, 497, 36)	255	497	36			5.628	5.511	0.904	133	3	fca3	2	7	0.714664	epidermis	on	1
44168	(249, 547, 35)	249	547	35	(249, 542, 37)	249	542	37			5.635	5.435	0.922	69	3	fca3	2	8	0.676714	epidermis	on	1
69560	(251, 589, 40)	251	589	40	(248, 606, 39)	248	606	39			5.168	5.208	0.946	29	3	fca3	2	9	0.255002	epidermis	off	1
96047	(228, 711, 34)	228	711	34	(238, 697, 40)	238	697	40			5.216	5.131	0.907	53	3	fca3	2	10	0.619827	epidermis	off	1
154986	(238, 796, 45)	238	796	45	(228, 801, 42)	228	801	42			5.338	4.876	0.888	13	3	fca3	2	11	1.13526	epidermis	on	1
143389	(232, 913, 53)	232	913	53	(227, 914, 53)	227	914	53			5.637	4.866	0.953	11	3	fca3	2	12	1.04901	epidermis	on	1
11981	(334, 80, 34)	334	80	34	(331, 80, 33)	331	80	33			3.651	5.617	0.582	343	3	fca3	3	0	0.656196	epidermis	off	1
15589	(332, 118, 35)	332	118	35	(326, 119, 33)	326	119	33			3.86	5.443	0.715	173	3	fca3	3	1	-0.0443986	epidermis	off	1
21083	(318, 163, 31)	318	163	31	(319, 163, 31)	319	163	31			4.586	5.611	0.76	106	3	fca3	3	2	0.423211	epidermis	off	1
19750	(309, 210, 29)	309	210	29	(312, 211, 29)	312	211	29			4.889	5.888	0.722	164	3	fca3	3	3	0.883468	epidermis	on	1
17113	(306, 255, 28)	306	255	28	(303, 257, 26)	303	257	26			5.871	6.341	0.758	95	3	fca3	3	4	1.40438	epidermis	on	1
25641	(308, 303, 29)	308	303	29	(308, 303, 29)	308	303	29			5.74	6.201	0.75	86	3	fca3	3	5	1.45233	epidermis	on	1
25807	(303, 348, 29)	303	348	29	(297, 354, 26)	297	354	26			5.664	6.187	0.781	57	3	fca3	3	6	1.06524	epidermis	on	1
28786	(298, 427, 27)	298	427	27	(293, 425, 25)	293	425	25			4.552	5.501	0.769	45	3	fca3	3	7	0.418376	epidermis	off	1
30037	(292, 483, 27)	292	483	27	(283, 494, 23)	283	494	23			4.994	5.592	0.777	122	3	fca3	3	8	0.835284	epidermis	might be on	1
31752	(284, 553, 28)	284	553	28	(278, 567, 25)	278	567	25			4.544	5.452	0.75	96	3	fca3	3	9	0.606667	epidermis	off	1
41818	(279, 634, 30)	279	634	30	(272, 640, 26)	272	640	26			5.4	5.384	0.777	124	3	fca3	3	10	1.56581	epidermis	on	1
41047	(267, 729, 27)	267	729	27	(264, 726, 25)	264	726	25			4.521	5.139	0.821	48	3	fca3	3	11	0.367699	epidermis	off	1
73365	(260, 855, 32)	260	855	32	(257, 826, 29)	257	826	29			4.993	5.028	0.87	68	3	fca3	3	12	0.71108	epidermis	off	1
85058	(259, 925, 38)	259	925	38	(258, 943, 40)	258	943	40			4.858	4.893	0.9	108	3	fca3	3	13	0.504778	epidermis	off	1
7342	(261, 1008, 52)	261	1008	52	(255, 1006, 53)	255	1006	53			1.806	5.538	0.052	368	3	fca3	3	14	29.1928			1
11387	(377, 63, 41)	377	63	41	(386, 61, 43)	386	61	43			2.786	5.164	0.528	293	3	fca3	4	0	0.112515			1
15111	(379, 86, 43)	379	86	43	(383, 86, 42)	383	86	42			3.467	5.279	0.638	191	3	fca3	4	1	0.155169	epidermis	off	1
10488	(373, 114, 40)	373	114	40	(378, 113, 40)	378	113	40			3.749	6.082	0.536	471	3	fca3	4	2	0.912403			1
9864	(366, 141, 36)	366	141	36	(374, 139, 38)	374	139	38			3.139	5.79	0.507	294	3	fca3	4	3	0.401321			1
15865	(367, 164, 37)	367	164	37	(377, 159, 41)	377	159	41			3.415	5.879	0.503	239	3	fca3	4	4	0.910264			1
17102	(354, 188, 36)	354	188	36	(371, 183, 40)	371	183	40			3.441	5.868	0.551	174	3	fca3	4	5	0.377009	epidermis	might be on	1
11410	(357, 214, 33)	357	214	33	(366, 211, 36)	366	211	36			3.223	6.104	0.484	265	3	fca3	4	6	0.555091			1
13719	(358, 235, 33)	358	235	33	(366, 231, 36)	366	231	36			3.536	6.03	0.516	243	3	fca3	4	7	0.822713			1
28566	(352, 269, 31)	352	269	31	(362, 268, 34)	362	268	34			5.285	5.803	0.796	153	3	fca3	4	8	0.836447	epidermis	might be on	1
18913	(359, 302, 36)	359	302	36	(363, 298, 37)	363	298	37			4.191	5.701	0.655	161	3	fca3	4	9	0.697473	epidermis	might be on	1
18235	(349, 330, 33)	349	330	33	(359, 326, 37)	359	326	37			3.223	5.305	0.587	242	3	fca3	4	10	0.18563	epidermis	off	1
42244	(346, 370, 32)	346	370	32	(350, 367, 33)	350	367	33			6.369	5.787	0.923	41	3	fca3	4	11	1.11333	epidermis	on	1
32414	(353, 410, 36)	353	410	36	(354, 407, 38)	354	407	38			5.276	5.392	0.893	151	3	fca3	4	12	0.516175	epidermis	might be on	1
39793	(335, 453, 34)	335	453	34	(347, 449, 38)	347	449	38			5.332	5.297	0.938	115	3	fca3	4	13	0.387435	epidermis	off	1
38481	(328, 497, 34)	328	497	34	(340, 495, 37)	340	495	37			4.97	5.416	0.863	107	3	fca3	4	14	0.34298	epidermis	off	1
38296	(323, 551, 33)	323	551	33	(333, 544, 36)	333	544	36			5.134	5.293	0.927	92	3	fca3	4	15	0.245296	epidermis	off	1
96437	(321, 601, 35)	321	601	35	(329, 617, 36)	329	617	36			5.37	5.129	0.901	40	3	fca3	4	16	0.831044	epidermis	on	1
107896	(309, 708, 34)	309	708	34	(314, 726, 34)	314	726	34			5.444	5.042	0.925	10	3	fca3	4	17	0.843405	epidermis	on	1
81906	(298, 835, 44)	298	835	44	(305, 838, 45)	305	838	45			5.225	5.023	0.891	185	3	fca3	4	18	0.841198	epidermis		1
79871	(298, 916, 47)	298	916	47	(303, 940, 50)	303	940	50			4.895	4.838	0.9	23	3	fca3	4	19	0.600889	epidermis	off	1
31983	(425, 228, 51)	425	228	51	(429, 233, 51)	429	233	51			4.808	5.36	0.861	148	3	fca3	5	0	0.224204	epidermis	off	1
29421	(419, 283, 50)	419	283	50	(423, 286, 50)	423	286	50			5.168	5.339	0.844	241	3	fca3	5	1	0.784223	epidermis	on	1
31589	(411, 333, 49)	411	333	49	(416, 338, 49)	416	338	49			4.933	5.17	0.888	144	3	fca3	5	2	0.38518	epidermis	off	1
24860	(405, 398, 49)	405	398	49	(409, 394, 49)	409	394	49			4.857	5.186	0.876	93	3	fca3	5	3	0.358521	epidermis	off	1
25918	(399, 444, 49)	399	444	49	(399, 447, 49)	399	447	49			5.568	5.381	0.867	288	3	fca3	5	4	1.04115	epidermis	on	1
39012	(389, 511, 49)	389	511	49	(392, 516, 50)	392	516	50			4.71	5.077	0.889	98	3	fca3	5	5	0.221088	epidermis	off	1
41559	(384, 578, 50)	384	578	50	(385, 595, 51)	385	595	51			4.928	5.103	0.88	84	3	fca3	5	6	0.497	epidermis	off	1
92391	(357, 779, 49)	357	779	49	(370, 729, 51)	370	729	51			5.23	5.077	0.916	142	3	fca3	5	7	0.632607	epidermis	off	1
116660	(355, 874, 58)	355	874	58	(357, 875, 57)	357	875	57			4.775	4.853	0.908	71	3	fca3	5	8	0.405811	epidermis	off	1
31357	(351, 983, 63)	351	983	63	(352, 985, 63)	352	985	63			4.579	4.901	0.87	334	3	fca3	5	9	0.362218	epidermis	off	1
7281	(482, 66, 66)	482	66	66	(481, 66, 66)	481	66	66			2.637	4.992	0.538	310	3	fca3	6	0	-0.090513			1
5646	(483, 88, 67)	483	88	67	(481, 88, 66)	481	88	66			2.309	5.199	0.439	391	3	fca3	6	1	0.0606811			1
8967	(475, 114, 65)	475	114	65	(475, 115, 65)	475	115	65			2.887	5.116	0.56	360	3	fca3	6	2	0.0393571	epidermis	off	1
7955	(477, 140, 66)	477	140	66	(476, 139, 66)	476	139	66			2.89	4.951	0.576	450	3	fca3	6	3	0.0663611	epidermis	off	1
7583	(473, 166, 66)	473	166	66	(475, 166, 66)	475	166	66			2.746	4.939	0.545	500	3	fca3	6	4	0.0995321			1
8004	(469, 190, 66)	469	190	66	(471, 191, 66)	471	191	66			2.822	4.968	0.568	396	3	fca3	6	5	0.000309859	epidermis	off	1
9888	(468, 224, 66)	468	224	66	(471, 223, 66)	471	223	66			3.275	5.197	0.608	283	3	fca3	6	6	0.189513	epidermis	off	1
10447	(466, 259, 66)	466	259	66	(467, 258, 66)	467	258	66			3.484	5.213	0.645	205	3	fca3	6	7	0.18855	epidermis	off	1
10979	(459, 293, 66)	459	293	66	(461, 292, 66)	461	292	66			3.416	5.069	0.653	206	3	fca3	6	8	0.16224	epidermis	off	1
7822	(455, 325, 66)	455	325	66	(457, 324, 66)	457	324	66			2.916	4.879	0.587	411	3	fca3	6	9	0.088632	epidermis	off	1
15844	(442, 371, 64)	442	371	64	(445, 365, 64)	445	365	64			3.421	4.962	0.695	182	3	fca3	6	10	-0.0396978	epidermis	off	1
9933	(442, 403, 67)	442	403	67	(444, 403, 66)	444	403	66			2.999	5.018	0.579	528	3	fca3	6	11	0.16162	epidermis	off	1
13090	(434, 444, 66)	434	444	66	(436, 444, 65)	436	444	65			3.305	5.09	0.64	251	3	fca3	6	12	0.0740625	epidermis	off	1
12929	(430, 485, 66)	430	485	66	(431, 482, 66)	431	482	66			3.315	4.948	0.664	150	3	fca3	6	13	0.0444699	epidermis	off	1
35216	(407, 662, 66)	407	662	66	(408, 665, 66)	408	665	66			3.639	4.904	0.669	246	3	fca3	6	15	0.535462	epidermis	off	1
22056	(418, 133, 63)	418	133	63	(427, 133, 63)	427	133	63			4.347	5.31	0.785	165	3	fca3	7	0	0.22758	cortex	might be on	1
25144	(415, 170, 63)	415	170	63	(421, 169, 64)	421	169	64			5.122	5.389	0.867	121	3	fca3	7	1	0.518728	cortex	on	1
22632	(411, 203, 63)	411	203	63	(418, 201, 64)	418	201	64			5.289	5.668	0.911	97	3	fca3	7	2	0.137708	cortex	on	1
22283	(406, 233, 62)	406	233	62	(416, 234, 63)	416	234	63			4.199	5.121	0.779	129	3	fca3	7	3	0.269244	cortex	on	1
21773	(408, 263, 64)	408	263	64	(410, 261, 64)	410	261	64			4.282	5.01	0.796	355	3	fca3	7	4	0.369397	cortex	on	1
35614	(399, 309, 62)	399	309	62	(405, 305, 63)	405	305	63			4.913	5.057	0.882	66	3	fca3	7	5	0.513295	cortex	might be on	1
41286	(392, 360, 61)	392	360	61	(400, 353, 62)	400	353	62			4.997	4.946	0.93	152	3	fca3	7	6	0.427118	cortex	off	1
29628	(384, 401, 62)	384	401	62	(394, 402, 63)	394	402	63			4.715	4.919	0.903	87	3	fca3	7	7	0.302484	cortex	off	1
31312	(377, 452, 62)	377	452	62	(385, 447, 63)	385	447	63			5.076	5.012	0.889	140	3	fca3	7	8	0.697786	cortex	off	1
37887	(374, 491, 63)	374	491	63	(378, 496, 63)	378	496	63			5.818	5.099	0.887	104	3	fca3	7	9	1.46019	cortex	on	1
40796	(368, 552, 62)	368	552	62	(370, 548, 63)	370	548	63			5.565	4.995	0.914	72	3	fca3	7	10	1.09362	cortex	on	1
46974	(360, 619, 63)	360	619	63	(365, 613, 63)	365	613	63			4.922	4.963	0.876	109	3	fca3	7	11	0.655721	cortex	on	1
52346	(357, 670, 63)	357	670	63	(353, 680, 62)	353	680	62			4.724	4.927	0.9	99	3	fca3	7	12	0.321889	cortex	on	1
66127	(334, 759, 62)	334	759	62	(341, 766, 62)	341	766	62			4.594	4.865	0.929	46	3	fca3	7	13	0.0801023	cortex	on	1
47796	(370, 186, 62)	370	186	62	(355, 189, 56)	355	189	56			5.191	5.227	0.943	63	3	fca3	8	0	0.277772	cortex	off	1
37666	(355, 222, 57)	355	222	57	(356, 221, 57)	356	221	57			5.509	5.36	0.884	113	3	fca3	8	1	0.8719	cortex	on	1
52272	(358, 253, 59)	358	253	59	(352, 254, 56)	352	254	56			5.055	5.104	0.911	103	3	fca3	8	2	0.444847	cortex	off	1
39953	(338, 291, 52)	338	291	52	(347, 286, 56)	347	286	56			5.213	5.142	0.906	30	3	fca3	8	3	0.611863	cortex	on	1
41764	(332, 325, 51)	332	325	51	(338, 321, 53)	338	321	53			5.926	5.305	0.919	50	3	fca3	8	4	1.14331	cortex	on	1
55110	(326, 363, 48)	326	363	48	(336, 355, 54)	336	355	54			4.926	5.071	0.879	33	3	fca3	8	5	0.533096	cortex	on	1
56686	(320, 393, 51)	320	393	51	(330, 389, 55)	330	389	55			5.105	5.011	0.946	20	3	fca3	8	6	0.385406	cortex	off	1
41032	(334, 416, 62)	334	416	62	(329, 419, 57)	329	419	57			4.664	4.969	0.944	49	3	fca3	8	7	-0.028322	cortex	off	1
76784	(308, 458, 46)	308	458	46	(321, 458, 54)	321	458	54			7.221	5.397	0.931	82	3	fca3	8	8	2.35918	cortex	on	1
114256	(301, 535, 48)	301	535	48	(310, 527, 55)	310	527	55			6.846	5.281	0.98	14	3	fca3	8	9	1.70471	cortex	on	1
121581	(297, 618, 50)	297	618	50	(305, 609, 56)	305	609	56			7.386	5.188	0.908	60	3	fca3	8	10	2.94636	cortex	on	1
159342	(283, 713, 50)	283	713	50	(293, 707, 56)	293	707	56			5.083	4.865	0.989	9	3	fca3	8	11	0.274535	cortex	off	1
126655	(273, 834, 55)	273	834	55	(281, 820, 61)	281	820	61			6.129	4.869	0.881	15	3	fca3	8	12	2.08787	cortex	on	1
124371	(234, 1001, 60)	234	1001	60	(260, 962, 63)	260	962	63			4.735	4.739	0.798	24	3	fca3	8	13	1.19458	cortex	off	1
26134	(309, 194, 62)	309	194	62	(314, 194, 62)	314	194	62			4.97	5.088	0.952	80	3	fca3	9	0	0.132588	cortex	off	1
15022	(306, 227, 62)	306	227	62	(311, 226, 63)	311	226	63			3.883	5.112	0.741	149	3	fca3	9	1	0.128216	cortex	off	1
12004	(306, 247, 64)	306	247	64	(309, 247, 65)	309	247	65			3.514	5.044	0.674	201	3	fca3	9	2	0.16965	cortex	off	1
27256	(300, 281, 63)	300	281	63	(304, 281, 63)	304	281	63			5.107	5.107	0.952	59	3	fca3	9	3	0.257496	cortex	off	1
39098	(296, 331, 62)	296	331	62	(295, 328, 63)	295	328	63			5.411	5.093	0.973	34	3	fca3	9	4	0.468151	cortex	on	1
35274	(288, 374, 64)	288	374	64	(286, 380, 63)	286	380	63			5.421	5.068	0.927	37	3	fca3	9	5	0.779896	cortex	on	1
41289	(279, 445, 62)	279	445	62	(277, 436, 62)	277	436	62			4.624	4.847	0.973	26	3	fca3	9	6	-0.0946876	cortex	off	1
44354	(276, 485, 63)	276	485	63	(270, 492, 63)	270	492	63			4.746	4.948	0.929	73	3	fca3	9	7	0.160719	cortex	off	1
39188	(260, 548, 62)	260	548	62	(264, 553, 64)	264	553	64			4.773	4.842	0.954	54	3	fca3	9	8	0.161145	cortex	off	1
38946	(256, 613, 62)	256	613	62	(257, 620, 63)	257	620	63			4.647	4.727	0.923	145	3	fca3	9	9	0.30767	cortex	off	1
41824	(246, 717, 64)	246	717	64	(250, 697, 65)	250	697	65			4.012	4.909	0.885	35	3	fca3	9	10	-0.375667	cortex	off	1
29457	(215, 244, 54)	215	244	54	(210, 248, 51)	210	248	51			4.458	5.395	0.777	117	4	fca3	1	0	0.342452	epidermis	off	1
79904	(198, 302, 51)	198	302	51	(199, 304, 50)	199	304	50			5.276	5.399	0.874	52	4	fca3	1	1	0.637613	epidermis	off	1
62408	(190, 367, 51)	190	367	51	(181, 388, 45)	181	388	45			5.234	5.377	0.874	92	4	fca3	1	2	0.611558	epidermis	off	1
67506	(181, 470, 52)	181	470	52	(176, 468, 47)	176	468	47			5.073	5.256	0.944	2008	4	fca3	1	3	0.117941	epidermis	off	1
88623	(186, 537, 57)	186	537	57	(180, 556, 53)	180	556	53			5.129	5.117	0.954	432	4	fca3	1	4	0.25931	epidermis	off	1
115812	(183, 673, 64)	183	673	64	(176, 648, 58)	176	648	58			4.923	5.098	0.972	1440	4	fca3	1	5	-0.0331852	epidermis	off	1
131155	(180, 710, 68)	180	710	68	(176, 754, 63)	176	754	63			5.064	5.04	0.891	51	4	fca3	1	6	0.643502	epidermis	off	1
135542	(190, 863, 77)	190	863	77	(180, 882, 67)	180	882	67			5.082	4.891	0.492	24	4	fca3	1	7	5.43827			1
55252	(189, 971, 76)	189	971	76	(186, 984, 69)	186	984	69			4.721	4.823	0.586	44	4	fca3	1	8	3.23331	epidermis	off	1
34144	(289, 117, 62)	289	117	62	(268, 129, 51)	268	129	51			4.124	5.406	0.776	118	4	fca3	2	0	-0.091567	epidermis	off	1
30392	(271, 152, 55)	271	152	55	(256, 159, 48)	256	159	48			4.226	5.524	0.759	91	4	fca3	2	1	0.0438524	epidermis	off	1
38474	(264, 183, 54)	264	183	54	(247, 193, 46)	247	193	46			4.34	5.342	0.824	62	4	fca3	2	2	-0.0750097	epidermis	off	1
11571	(220, 231, 35)	220	231	35	(229, 226, 38)	229	226	38			2.589	5.344	0.473	258	4	fca3	2	3	0.129573			1
17132	(251, 229, 50)	251	229	50	(239, 235, 45)	239	235	45			3.108	5.343	0.595	249	4	fca3	2	4	-0.119471	epidermis	off	1
40079	(245, 262, 48)	245	262	48	(229, 271, 40)	229	271	40			4.959	5.529	0.901	64	4	fca3	2	5	-0.0251154	epidermis	off	1
56030	(213, 315, 34)	213	315	34	(231, 303, 44)	231	303	44			5.318	5.557	0.859	125	4	fca3	2	6	0.63392	epidermis	might be on	1
52378	(202, 360, 31)	202	360	31	(216, 350, 38)	216	350	38			5.183	5.367	0.922	119	4	fca3	2	7	0.254475	epidermis	off	1
53356	(197, 401, 29)	197	401	29	(212, 389, 38)	212	389	38			5.168	5.41	0.946	60	4	fca3	2	8	0.0530021	epidermis	off	1
37415	(222, 419, 44)	222	419	44	(205, 430, 36)	205	430	36			4.636	5.42	0.856	138	4	fca3	2	9	-0.00411215	epidermis	off	1
37446	(195, 469, 33)	195	469	33	(204, 462, 37)	204	462	37			4.801	5.488	0.861	2009	4	fca3	2	10	0.0880743	epidermis	off	1
59931	(190, 515, 32)	190	515	32	(206, 501, 41)	206	501	41			5.212	5.302	0.979	48	4	fca3	2	11	0.0217998	epidermis	off	1
63911	(195, 555, 34)	195	555	34	(203, 553, 39)	203	553	39			5.316	5.332	0.948	34	4	fca3	2	12	0.275595	epidermis	off	1
78786	(211, 602, 45)	211	602	45	(210, 605, 46)	210	605	46			5.578	5.361	0.904	43	4	fca3	2	13	0.809354	epidermis	might be on	1
82455	(196, 668, 41)	196	668	41	(208, 667, 48)	208	667	48			5.243	5.261	0.994	1148	4	fca3	2	14	0.0136479	epidermis	off	1
101548	(215, 704, 63)	215	704	63	(208, 727, 54)	208	727	54			5.224	5.184	0.894	33	4	fca3	2	15	0.6594	epidermis	off	1
134592	(221, 781, 71)	221	781	71	(210, 800, 56)	210	800	56			5.344	5.155	0.811	36	4	fca3	2	16	1.4344	epidermis	off	1
241264	(228, 909, 67)	228	909	67	(219, 911, 62)	219	911	62			5.837	5.099	0.882	11	4	fca3	2	17	1.51891	epidermis	on	1
34946	(240, 1005, 77)	240	1005	77	(231, 1001, 71)	231	1001	71			4.661	5.241	0.349	85	4	fca3	2	18	8.1143			1
34722	(269, 241, 37)	269	241	37	(282, 232, 44)	282	232	44			4.47	5.315	0.778	191	4	fca3	3	0	0.430501	epidermis	off	1
19960	(262, 281, 35)	262	281	35	(257, 282, 33)	257	282	33			4.73	5.845	0.765	1967	4	fca3	3	1	0.338007	epidermis	on	1
52762	(263, 329, 37)	263	329	37	(252, 339, 31)	252	339	31			5.396	5.604	0.849	100	4	fca3	3	2	0.751713	epidermis	on	1
55624	(248, 427, 33)	248	427	33	(239, 434, 28)	239	434	28			4.857	5.291	0.863	84	4	fca3	3	3	0.337042	epidermis	off	1
67454	(243, 517, 34)	243	517	34	(234, 528, 29)	234	528	29			5.019	5.185	0.924	58	4	fca3	3	4	0.246818	epidermis	off	1
90380	(245, 610, 37)	245	610	37	(241, 630, 36)	241	630	36			5.025	5.139	0.879	63	4	fca3	3	5	0.577724	epidermis	off	1
118272	(243, 752, 43)	243	752	43	(246, 749, 45)	246	749	45			5.012	5.087	0.938	32	4	fca3	3	6	0.256284	epidermis	off	1
203168	(262, 867, 60)	262	867	60	(260, 914, 58)	260	914	58			4.954	4.937	0.934	10	4	fca3	3	7	0.367069	epidermis	off	1
81673	(285, 344, 60)	285	344	60	(287, 341, 60)	287	341	60			5.742	5.255	0.998	23	4	fca3	4	0	0.498507	cortex	on	1
78306	(280, 384, 60)	280	384	60	(281, 387, 60)	281	387	60			6.735	5.503	0.995	27	4	fca3	4	1	1.26584	cortex	on	1
86936	(259, 445, 51)	259	445	51	(277, 432, 60)	277	432	60			5.11	5.083	0.994	20	4	fca3	4	2	0.0578451	cortex	off	1
98807	(285, 459, 75)	285	459	75	(272, 479, 61)	272	479	61			5.323	5.093	0.677	17	4	fca3	4	3	2.76963	cortex	off	1
123576	(273, 523, 65)	273	523	65	(271, 532, 62)	271	532	62			5.888	5.232	1	9	4	fca3	4	4	0.656	cortex	on	1
102323	(267, 584, 62)	267	584	62	(277, 583, 66)	277	583	66			5.464	5.132	0.992	29	4	fca3	4	5	0.376065	cortex	on	1
112662	(277, 634, 77)	277	634	77	(271, 637, 68)	271	637	68			5.204	5.011	0.537	19	4	fca3	4	6	4.67988			1
145649	(263, 740, 74)	263	740	74	(262, 724, 70)	262	724	70			6.08	5.043	0.696	18	4	fca3	4	7	3.69263	cortex	on	1
94366	(258, 814, 77)	258	814	77	(267, 848, 73)	267	848	73			4.779	5.267	0.508	73	4	fca3	4	8	4.14048			1
40813	(300, 400, 44)	300	400	44	(308, 398, 46)	308	398	46			5.061	5.431	0.885	71	4	fca3	5	0	0.287644	epidermis	might be on	1
51854	(305, 435, 44)	305	435	44	(303, 434, 45)	303	434	45			5.356	5.329	0.958	79	4	fca3	5	1	0.261814	epidermis	might be on	1
53339	(291, 477, 42)	291	477	42	(301, 475, 44)	301	475	44			5.84	5.399	0.938	94	4	fca3	5	2	0.827013	epidermis	on	1
60382	(302, 510, 49)	302	510	49	(301, 517, 46)	301	517	46			5.781	5.398	0.948	81	4	fca3	5	3	0.700101	epidermis	on	1
157999	(300, 570, 46)	300	570	46	(307, 570, 51)	307	570	51			6.711	5.521	0.997	2017	4	fca3	5	4	1.21019	epidermis	on	1
181707	(330, 644, 74)	330	644	74	(305, 665, 55)	305	665	55			5.223	5.122	0.72	16	4	fca3	5	5	2.13217	epidermis	off	1
194713	(290, 761, 52)	290	761	52	(304, 759, 62)	304	759	62			5.22	5.086	0.97	13	4	fca3	5	6	0.295443	epidermis	off	1
165682	(303, 867, 71)	303	867	71	(310, 868, 68)	310	868	68			5.178	4.935	0.815	21	4	fca3	5	7	1.41837	epidermis	on	1
74971	(316, 1008, 77)	316	1008	77	(314, 976, 71)	314	976	71			4.943	4.891	0.282	28	4	fca3	5	8	12.6374			1
42602	(413, 274, 76)	413	274	76	(406, 282, 68)	406	282	68			5.203	5.321	0.575	127	4	fca3	6	0	3.7277	epidermis	off	1
61021	(390, 324, 66)	390	324	66	(389, 327, 63)	389	327	63			5.282	5.318	0.911	121	4	fca3	6	1	0.480024	epidermis	off	1
60494	(407, 355, 77)	407	355	77	(382, 369, 62)	382	369	62			5.008	5.203	0.519	39	4	fca3	6	2	4.44633			1
83608	(375, 407, 65)	375	407	65	(375, 410, 62)	375	410	62			5.201	5.191	0.907	106	4	fca3	6	3	0.543289	epidermis	off	1
168495	(363, 460, 59)	363	460	59	(370, 486, 62)	370	486	62			5.107	5.076	0.957	8	4	fca3	6	4	0.260468	epidermis	off	1
148806	(369, 564, 77)	369	564	77	(367, 587, 66)	367	587	66			5.252	5.035	0.5	14	4	fca3	6	5	5.469			1
131072	(365, 658, 75)	365	658	75	(362, 707, 70)	362	707	70			4.901	4.964	0.673	30	4	fca3	6	6	2.31832	epidermis	off	1
39276	(357, 977, 77)	357	977	77	(357, 908, 72)	357	908	72			2.843	4.807	0.35	311	4	fca3	6	7	3.31586			1
39956	(231, 158, 77)	231	158	77	(220, 167, 68)	220	167	68			4.988	5.244	0.509	88	4	fca3	7	0	4.55561			1
24482	(229, 200, 77)	229	200	77	(224, 202, 71)	224	202	71			5.044	5.372	0.495	144	4	fca3	7	1	4.8179			1
40055	(218, 239, 77)	218	239	77	(208, 247, 67)	208	247	67			5.083	5.282	0.534	66	4	fca3	7	2	4.23673			1
53554	(211, 282, 77)	211	282	77	(197, 295, 66)	197	295	66			5.103	5.277	0.524	87	4	fca3	7	3	4.46155			1
53027	(207, 334, 77)	207	334	77	(192, 340, 66)	192	340	66			5.447	5.308	0.498	68	4	fca3	7	4	5.62975			1
58805	(204, 383, 76)	204	383	76	(186, 389, 67)	186	389	67			5.353	5.276	0.561	57	4	fca3	7	5	4.26589	epidermis	might be on	1
57965	(186, 440, 71)	186	440	71	(178, 440, 67)	178	440	67			5.298	5.217	0.854	41	4	fca3	7	6	0.986747	epidermis	off	1
95459	(178, 514, 72)	178	514	72	(172, 517, 68)	172	517	68			4.992	5.069	0.806	101	4	fca3	7	7	1.12455	epidermis	off	1
83365	(175, 625, 77)	175	625	77	(162, 614, 70)	162	614	70			4.917	5.023	0.481	93	4	fca3	7	8	5.19945			1
54831	(157, 685, 77)	157	685	77	(155, 715, 71)	155	715	71			4.628	5.144	0.444	113	4	fca3	7	9	5.27942			1
37129	(155, 805, 77)	155	805	77	(152, 842, 73)	152	842	73			3.573	5.051	0.27	206	4	fca3	7	10	8.18233			1
32201	(155, 981, 77)	155	981	77	(151, 973, 72)	151	973	72			3.567	4.755	0.352	300	4	fca3	7	11	5.37852			1
58876	(258, 291, 77)	258	291	77	(249, 303, 69)	249	303	69			5.929	5.347	0.537	38	4	fca3	8	0	5.69397			1
37109	(246, 336, 77)	246	336	77	(244, 343, 70)	244	343	70			5.3	5.307	0.524	89	4	fca3	8	1	4.8075			1
57114	(244, 374, 77)	244	374	77	(236, 385, 66)	236	385	66			5.749	5.321	0.537	55	4	fca3	8	2	5.38477			1
53758	(243, 413, 77)	243	413	77	(232, 423, 67)	232	423	67			4.946	5.189	0.527	2010	4	fca3	8	3	4.1962			1
57813	(242, 449, 77)	242	449	77	(229, 459, 69)	229	459	69			5.729	5.263	0.506	54	4	fca3	8	4	6.05913			1
86792	(219, 516, 72)	219	516	72	(226, 515, 69)	226	515	69			5.179	4.97	0.865	22	4	fca3	8	5	1.01728	cortex	on	1
66634	(230, 585, 77)	230	585	77	(224, 595, 72)	224	595	72			4.952	5.084	0.505	126	4	fca3	8	6	4.72194			1
12098	(176, 325, 66)	176	325	66	(174, 326, 64)	174	326	64			3.687	5.646	0.234	291	5	fca3	1	0	10.1104			1
38067	(173, 379, 65)	173	379	65	(174, 378, 61)	174	378	61			5.246	5.412	0.588	71	5	fca3	1	1	3.50977	epidermis	off	1
50549	(172, 437, 63)	172	437	63	(176, 445, 60)	176	445	60			5.159	5.263	0.694	61	5	fca3	1	2	2.17072	epidermis	off	1
60209	(180, 508, 62)	180	508	62	(177, 515, 59)	177	515	59			5.132	5.146	0.736	141	5	fca3	1	3	1.82683	epidermis	off	1
68241	(178, 589, 62)	178	589	62	(176, 594, 59)	176	594	59			5.208	5.195	0.76	34	5	fca3	1	4	1.65763	epidermis	off	1
65361	(174, 669, 61)	174	669	61	(179, 673, 59)	179	673	59			5.155	5.229	0.79	132	5	fca3	1	5	1.29632	epidermis	off	1
81535	(187, 746, 65)	187	746	65	(179, 758, 59)	179	758	59			5.188	5.035	0.56	31	5	fca3	1	6	4.22929	epidermis	might be on	1
91151	(186, 820, 66)	186	820	66	(176, 856, 59)	176	856	59			4.977	4.96	0.487	84	5	fca3	1	7	5.25971			1
78146	(173, 940, 65)	173	940	65	(171, 964, 61)	171	964	61			4.966	4.921	0.568	43	5	fca3	1	8	3.82196	epidermis	off	1
25263	(197, 265, 52)	197	265	52	(201, 263, 54)	201	263	54			4.337	5.239	0.826	81	5	fca3	2	0	0.0116053	epidermis	off	1
17769	(210, 282, 60)	210	282	60	(204, 286, 54)	204	286	54			3.356	5.438	0.565	155	5	fca3	2	1	0.501823	epidermis	off	1
19550	(210, 300, 62)	210	300	62	(207, 307, 52)	207	307	52			3.343	5.395	0.508	160	5	fca3	2	2	1.18571			1
19010	(208, 323, 57)	208	323	57	(206, 326, 53)	206	326	53			3.696	5.609	0.639	122	5	fca3	2	3	0.175038	epidermis	off	1
25606	(211, 341, 60)	211	341	60	(209, 345, 53)	209	345	53			4.404	5.576	0.7	112	5	fca3	2	4	0.715429	epidermis	off	1
16201	(210, 373, 47)	210	373	47	(209, 371, 48)	209	371	48			4.942	6.08	0.593	157	5	fca3	2	5	2.2539	epidermis	on	1
24007	(212, 391, 48)	212	391	48	(212, 391, 48)	212	391	48			4.88	6.011	0.63	148	5	fca3	2	6	1.73503	epidermis	on	1
51122	(214, 422, 47)	214	422	47	(210, 421, 48)	210	421	48			8.751	6.396	0.996	48	5	fca3	2	7	2.39014	epidermis	on	1
57165	(212, 471, 43)	212	471	43	(211, 470, 46)	211	470	46			5.689	5.481	0.968	46	5	fca3	2	8	0.396066	epidermis	off	1
51024	(214, 520, 40)	214	520	40	(213, 522, 41)	213	522	41			5.867	5.495	0.994	40	5	fca3	2	9	0.407414	epidermis	off	1
48133	(205, 572, 37)	205	572	37	(209, 566, 42)	209	566	42			5.667	5.524	0.954	82	5	fca3	2	10	0.416252	epidermis	off	1
55588	(214, 609, 43)	214	609	43	(212, 611, 43)	212	611	43			6.32	5.58	1	33	5	fca3	2	11	0.74	epidermis	on	1
53939	(202, 663, 40)	202	663	40	(214, 657, 45)	214	657	45			5.349	5.331	0.946	146	5	fca3	2	12	0.323334	epidermis	off	1
62146	(215, 708, 39)	215	708	39	(217, 704, 44)	217	704	44			5.932	5.445	1	32	5	fca3	2	13	0.487	epidermis	off	1
65270	(223, 760, 41)	223	760	41	(220, 756, 45)	220	756	45			6.371	5.495	0.999	29	5	fca3	2	14	0.882377	epidermis	on	1
69313	(222, 802, 46)	222	802	46	(217, 813, 44)	217	813	44			6.091	5.36	0.987	25	5	fca3	2	15	0.811226	epidermis	on	1
81874	(219, 871, 45)	219	871	45	(217, 873, 47)	217	873	47			5.856	5.25	0.981	27	5	fca3	2	16	0.719419	epidermis	on	1
90473	(220, 927, 54)	220	927	54	(216, 935, 50)	216	935	50			6.542	5.373	0.996	20	5	fca3	2	17	1.19527	epidermis	on	1
73867	(209, 1008, 56)	209	1008	56	(211, 989, 52)	211	989	52			5.578	5.151	0.521	28	5	fca3	2	18	5.55533			1
27691	(230, 299, 39)	230	299	39	(233, 306, 39)	233	306	39			5.245	5.518	0.833	194	5	fca3	3	0	0.778519	epidermis	might be on	1
30845	(235, 358, 36)	235	358	36	(237, 364, 36)	237	364	36			5.188	5.45	0.879	167	5	fca3	3	1	0.452162	epidermis	off	1
27652	(240, 426, 31)	240	426	31	(242, 425, 33)	242	425	33			4.794	5.44	0.832	244	5	fca3	3	2	0.322019	epidermis	off	1
32552	(240, 477, 30)	240	477	30	(242, 488, 30)	242	488	30			5.427	5.516	0.881	361	5	fca3	3	3	0.644045	epidermis	might be on	1
47202	(243, 572, 23)	243	572	23	(242, 579, 22)	242	579	22			6.511	5.671	0.974	39	5	fca3	3	4	1.0138	epidermis	on	1
52145	(248, 658, 23)	248	658	23	(243, 658, 22)	243	658	22			5.815	5.493	0.961	75	5	fca3	3	5	0.557989	epidermis	on	1
60930	(252, 737, 23)	252	737	23	(249, 744, 21)	249	744	21			5.555	5.296	0.993	58	5	fca3	3	6	0.298159	epidermis	might be on	1
69409	(250, 836, 22)	250	836	22	(250, 836, 22)	250	836	22			5.337	5.153	0.935	53	5	fca3	3	7	0.555021	epidermis	might be on	1
126334	(255, 955, 30)	255	955	30	(249, 949, 25)	249	949	25			6.832	5.176	0.896	47	5	fca3	3	8	2.449	epidermis	on	1
20620	(251, 111, 44)	251	111	44	(250, 107, 45)	250	107	45			5.162	5.455	0.921	243	5	fca3	4	0	0.149777	epidermis		1
10261	(252, 145, 41)	252	145	41	(251, 145, 41)	251	145	41			4.065	5.524	0.747	199	5	fca3	4	1	-0.0822329	epidermis		1
12108	(253, 172, 40)	253	172	40	(252, 171, 40)	252	171	40			4.396	5.481	0.805	166	5	fca3	4	2	-0.0201304	epidermis		1
19104	(254, 208, 37)	254	208	37	(254, 206, 39)	254	206	39			5.202	5.442	0.956	101	5	fca3	4	3	-0.000577406	epidermis		1
18254	(258, 248, 35)	258	248	35	(257, 247, 35)	257	247	35			5.309	5.515	0.973	110	5	fca3	4	4	-0.0586793	epidermis		1
20315	(261, 290, 32)	261	290	32	(260, 289, 33)	260	289	33			5.464	5.697	0.943	209	5	fca3	4	5	0.0972736	epidermis		1
23931	(267, 335, 31)	267	335	31	(266, 332, 32)	266	332	32			5.356	5.493	0.965	119	5	fca3	4	6	0.0572591	epidermis		1
27391	(269, 394, 27)	269	394	27	(269, 387, 29)	269	387	29			5.3	5.435	0.937	140	5	fca3	4	7	0.22135	epidermis		1
23161	(272, 444, 24)	272	444	24	(272, 442, 25)	272	442	25			5.342	5.514	0.957	103	5	fca3	4	8	0.0680272	epidermis		1
31070	(277, 498, 22)	277	498	22	(274, 501, 22)	274	501	22			5.471	5.396	0.981	65	5	fca3	4	9	0.180962	epidermis		1
36487	(280, 561, 21)	280	561	21	(278, 559, 21)	278	559	21			5.655	5.554	0.987	56	5	fca3	4	10	0.175483	epidermis	might be on	1
64028	(284, 647, 21)	284	647	21	(283, 655, 19)	283	655	19			7.289	5.594	0.929	79	5	fca3	4	11	2.25207	epidermis	on	1
81380	(291, 773, 22)	291	773	22	(290, 783, 20)	290	783	20			5.919	5.253	0.96	63	5	fca3	4	12	0.912625	epidermis	on	1
98665	(290, 966, 27)	290	966	27	(290, 939, 25)	290	939	25			5.321	5.155	0.998	44	5	fca3	4	13	0.176663	epidermis	might be on	1
41311	(268, 326, 58)	268	326	58	(269, 326, 57)	269	326	57			4.707	5.066	0.892	72	5	fca3	5	0	0.210906	epidermis	off	1
38619	(280, 347, 66)	280	347	66	(273, 352, 57)	273	352	57			4.738	5.142	0.496	90	5	fca3	5	1	4.41042			1
35537	(286, 372, 66)	286	372	66	(271, 378, 56)	271	378	56			4.106	5.053	0.416	87	5	fca3	5	2	4.81719			1
31533	(265, 397, 63)	265	397	63	(271, 400, 57)	271	400	57			4.349	5.074	0.667	73	5	fca3	5	3	1.44624	epidermis	off	1
86486	(276, 445, 50)	276	445	50	(272, 437, 54)	272	437	54			4.977	5.044	0.994	23	5	fca3	5	4	-0.0369577	epidermis	off	1
105371	(280, 481, 51)	280	481	51	(272, 489, 53)	272	489	53			5.01	5.008	0.998	17	5	fca3	5	5	0.0120401	epidermis	off	1
123096	(276, 560, 46)	276	560	46	(275, 552, 52)	275	552	52			8.173	5.285	0.994	14	5	fca3	5	6	2.93733	epidermis	on	1
121835	(273, 614, 53)	273	614	53	(274, 614, 52)	274	614	52			7.12	5.302	1	15	5	fca3	5	7	1.818	epidermis	on	1
136323	(280, 680, 45)	280	680	45	(278, 674, 51)	278	674	51			10.778	5.442	1	16	5	fca3	5	8	5.336	epidermis	on	1
158056	(281, 743, 47)	281	743	47	(280, 738, 53)	280	738	53			9.3	5.284	0.993	12	5	fca3	5	9	4.08156	epidermis	on	1
192658	(281, 833, 45)	281	833	45	(279, 820, 52)	279	820	52			7.023	4.987	0.999	11	5	fca3	5	10	2.04303	epidermis	on	1
181034	(278, 899, 59)	278	899	59	(280, 908, 54)	280	908	54			7.137	4.964	0.945	10	5	fca3	5	11	2.58838	epidermis	on	1
122387	(280, 1002, 59)	280	1002	59	(275, 985, 56)	275	985	56			5.815	4.829	0.757	13	5	fca3	5	12	2.85264	epidermis	on	1
9045	(297, 133, 48)	297	133	48	(293, 133, 46)	293	133	46			3.167	5.392	0.613	277	5	fca3	6	0	-0.225605	epidermis	off	1
13871	(292, 155, 47)	292	155	47	(291, 155, 46)	291	155	46			3.811	5.292	0.735	179	5	fca3	6	1	-0.106966	epidermis	off	1
16821	(287, 180, 43)	287	180	43	(293, 176, 47)	293	176	47			3.54	5.27	0.675	233	5	fca3	6	2	-0.0255556	epidermis	off	1
14822	(305, 194, 48)	305	194	48	(298, 195, 47)	298	195	47			3.761	5.698	0.632	230	5	fca3	6	3	0.252949	epidermis	off	1
13700	(304, 214, 46)	304	214	46	(295, 214, 46)	295	214	46			3.427	5.417	0.605	147	5	fca3	6	4	0.247463	epidermis	off	1
12594	(297, 235, 44)	297	235	44	(297, 235, 43)	297	235	43			3.452	5.413	0.631	367	5	fca3	6	5	0.0576815	epidermis	off	1
13591	(306, 256, 43)	306	256	43	(297, 256, 41)	297	256	41			3.64	5.323	0.682	322	5	fca3	6	6	0.0142434	epidermis	off	1
15854	(302, 281, 40)	302	281	40	(300, 280, 40)	300	280	40			4.321	5.353	0.791	219	5	fca3	6	7	0.109705	epidermis	off	1
15715	(307, 304, 41)	307	304	41	(304, 304, 40)	304	304	40			4.077	5.435	0.756	215	5	fca3	6	8	-0.0421429	epidermis	off	1
17205	(305, 331, 39)	305	331	39	(306, 331, 39)	306	331	39			4.696	5.472	0.839	217	5	fca3	6	9	0.125139	epidermis	off	1
21797	(313, 358, 39)	313	358	39	(307, 357, 39)	307	357	39			4.669	5.422	0.857	200	5	fca3	6	10	0.0260747	epidermis	off	1
17308	(304, 386, 35)	304	386	35	(308, 383, 38)	308	383	38			3.891	5.359	0.717	260	5	fca3	6	11	0.0677782	epidermis	off	1
17517	(318, 402, 42)	318	402	42	(311, 406, 37)	311	406	37			3.749	5.322	0.68	212	5	fca3	6	12	0.191235	epidermis	off	1
21199	(322, 427, 40)	322	427	40	(313, 429, 37)	313	429	37			4.07	5.452	0.739	181	5	fca3	6	13	0.0554425	epidermis	off	1
21408	(323, 451, 41)	323	451	41	(313, 454, 37)	313	454	37			4.246	5.464	0.716	328	5	fca3	6	14	0.466168	epidermis	off	1
23590	(322, 480, 39)	322	480	39	(316, 481, 37)	316	481	37			4.807	5.37	0.868	220	5	fca3	6	15	0.168018	epidermis	off	1
27122	(321, 514, 32)	321	514	32	(314, 512, 35)	314	512	35			4.951	5.358	0.926	93	5	fca3	6	16	-0.0113477	epidermis	off	1
22296	(319, 546, 29)	319	546	29	(316, 544, 32)	316	544	32			4.782	5.4	0.897	99	5	fca3	6	17	-0.0688963	epidermis	off	1
27265	(308, 574, 34)	308	574	34	(316, 573, 33)	316	573	33			4.895	5.401	0.864	128	5	fca3	6	18	0.264509	epidermis	off	1
53434	(328, 609, 30)	328	609	30	(323, 621, 33)	323	621	33			5.445	5.468	0.97	118	5	fca3	6	19	0.145402	epidermis	off	1
66787	(325, 711, 29)	325	711	29	(325, 690, 33)	325	690	33			5.495	5.469	0.942	85	5	fca3	6	20	0.364333	epidermis	off	1
74429	(333, 767, 31)	333	767	31	(331, 773, 34)	331	773	34			5.843	5.508	0.942	125	5	fca3	6	21	0.69476	epidermis	might be on	1
77504	(327, 854, 32)	327	854	32	(326, 853, 36)	326	853	36			5.527	5.461	0.923	108	5	fca3	6	22	0.527082	epidermis	might be on	1
94480	(332, 947, 36)	332	947	36	(328, 944, 41)	328	944	41			5.223	5.203	0.989	37	5	fca3	6	23	0.078092	epidermis	off	1
22097	(328, 1008, 46)	328	1008	46	(324, 1002, 43)	324	1002	43			4.863	5.336	0.456	178	5	fca3	6	24	5.32847			1
15523	(336, 228, 46)	336	228	46	(335, 220, 47)	335	220	47			4.03	5.395	0.721	368	5	fca3	7	0	0.194459	epidermis	off	1
18404	(339, 285, 42)	339	285	42	(337, 279, 42)	337	279	42			4.827	5.583	0.852	274	5	fca3	7	1	0.082493	epidermis	off	1
19451	(345, 347, 41)	345	347	41	(343, 336, 41)	343	336	41			4.575	5.505	0.828	305	5	fca3	7	2	0.0203623	epidermis	off	1
20732	(349, 388, 41)	349	388	41	(348, 394, 40)	348	394	40			4.915	5.517	0.85	299	5	fca3	7	3	0.265353	epidermis	off	1
28950	(354, 453, 41)	354	453	41	(354, 460, 41)	354	460	41			5.122	5.581	0.847	131	5	fca3	7	4	0.466226	epidermis	might be on	1
27573	(356, 535, 37)	356	535	37	(356, 534, 37)	356	534	37			5.583	5.483	0.889	241	5	fca3	7	5	0.79709	epidermis	on	1
33199	(362, 616, 37)	362	616	37	(361, 617, 37)	361	617	37			4.983	5.409	0.861	261	5	fca3	7	6	0.378456	epidermis	might be on	1
39973	(366, 709, 37)	366	709	37	(367, 719, 37)	367	719	37			4.671	5.209	0.809	115	5	fca3	7	7	0.564795	epidermis	off	1
92677	(368, 887, 41)	368	887	41	(370, 892, 40)	370	892	40			6.748	5.236	0.919	52	5	fca3	7	8	2.10676	epidermis	on	1
24896	(368, 997, 44)	368	997	44	(368, 994, 45)	368	994	45			4.778	5.15	0.945	94	5	fca3	7	9	-0.0939153	epidermis		1
18921	(362, 125, 64)	362	125	64	(355, 128, 60)	355	128	60			4.906	5.495	0.651	123	5	fca3	8	0	2.0411	epidermis	off	1
13484	(363, 161, 62)	363	161	62	(363, 163, 60)	363	163	60			4.821	5.471	0.69	313	5	fca3	8	1	1.51596	epidermis	off	1
16078	(370, 194, 62)	370	194	62	(367, 195, 59)	367	195	59			4.976	5.394	0.751	192	5	fca3	8	2	1.23183	epidermis	off	1
17441	(370, 229, 59)	370	229	59	(368, 231, 58)	368	231	58			5.537	5.611	0.874	144	5	fca3	8	3	0.72424	epidermis	on	1
16467	(372, 262, 59)	372	262	59	(370, 262, 58)	370	262	58			4.967	5.595	0.816	201	5	fca3	8	4	0.49201	epidermis	on	1
40825	(378, 301, 59)	378	301	59	(373, 311, 56)	373	311	56			6.007	5.606	0.855	182	5	fca3	8	5	1.41973	epidermis	on	1
27122	(376, 368, 56)	376	368	56	(377, 372, 55)	377	372	55			5.065	5.318	0.853	287	5	fca3	8	6	0.619866	epidermis	off	1
28883	(386, 432, 54)	386	432	54	(383, 430, 54)	383	430	54			5.099	5.299	0.897	288	5	fca3	8	7	0.385504	epidermis	off	1
26576	(386, 490, 54)	386	490	54	(384, 487, 54)	384	487	54			5.159	5.242	0.956	89	5	fca3	8	8	0.154444	epidermis	off	1
31094	(390, 531, 53)	390	531	53	(386, 540, 52)	386	540	52			5.098	5.257	0.947	170	5	fca3	8	9	0.126316	epidermis	off	1
73651	(393, 629, 51)	393	629	51	(393, 634, 52)	393	634	52			5.236	5.156	0.869	77	5	fca3	8	10	0.869316	epidermis	off	1
86956	(403, 761, 53)	403	761	53	(399, 766, 52)	399	766	52			4.951	5.036	0.921	95	5	fca3	8	11	0.339679	epidermis	off	1
115261	(394, 908, 63)	394	908	63	(396, 917, 59)	396	917	59			4.95	4.992	0.664	76	5	fca3	8	12	2.46282	epidermis	off	1
20669	(325, 216, 66)	325	216	66	(321, 220, 61)	321	220	61			4.834	5.312	0.409	229	5	fca3	9	0	6.50707			1
24351	(332, 244, 66)	332	244	66	(323, 247, 59)	323	247	59			5.679	5.494	0.419	269	5	fca3	9	1	8.0597			1
20299	(335, 269, 66)	335	269	66	(327, 273, 61)	327	273	61			5.595	5.508	0.434	127	5	fca3	9	2	7.38371			1
20856	(337, 296, 66)	337	296	66	(327, 300, 60)	327	300	60			5.655	5.519	0.459	195	5	fca3	9	3	6.80126			1
25654	(340, 324, 66)	340	324	66	(332, 327, 61)	332	327	61			6.044	5.449	0.496	284	5	fca3	9	4	6.73648			1
39457	(342, 358, 66)	342	358	66	(336, 363, 60)	336	363	60			6.85	5.48	0.51	124	5	fca3	9	5	7.95137			1
35425	(343, 397, 63)	343	397	63	(338, 400, 59)	338	400	59			6.949	5.436	0.741	66	5	fca3	9	6	3.94187	cortex	on	1
38398	(346, 433, 64)	346	433	64	(339, 436, 59)	339	436	59			8.773	5.76	0.648	126	5	fca3	9	7	7.77858	cortex	on	1
37091	(346, 469, 63)	346	469	63	(340, 471, 59)	340	471	59			5.868	5.311	0.745	74	5	fca3	9	8	2.56551	cortex	on	1
51405	(347, 511, 62)	347	511	62	(340, 510, 58)	340	510	58			6.761	5.324	0.806	45	5	fca3	9	9	3.06434	cortex	on	1
58242	(348, 557, 61)	348	557	61	(344, 556, 58)	344	556	58			6.574	5.213	0.868	35	5	fca3	9	10	2.36073	cortex	on	1
47881	(348, 597, 59)	348	597	59	(347, 596, 58)	347	596	58			6.066	5.331	0.925	57	5	fca3	9	11	1.22684	cortex	on	1
56930	(348, 633, 62)	348	633	62	(345, 635, 58)	345	635	58			6.512	5.3	0.81	54	5	fca3	9	12	2.73951	cortex	on	1
67237	(352, 683, 62)	352	683	62	(346, 682, 58)	346	682	58			7.121	5.221	0.777	51	5	fca3	9	13	3.94374	cortex	on	1
85532	(353, 732, 61)	353	732	61	(350, 736, 58)	350	736	58			6.1	5.021	0.868	24	5	fca3	9	14	2.00665	cortex	on	1
149308	(358, 815, 62)	358	815	62	(350, 817, 59)	350	817	59			8.849	5.239	0.81	19	5	fca3	9	15	5.68569	cortex	on	1
112173	(356, 937, 66)	356	937	66	(346, 930, 61)	346	930	61			6.903	5.082	0.508	21	5	fca3	9	16	8.50658			1
27420	(337, 1007, 66)	337	1007	66	(340, 1001, 62)	340	1001	62			4.774	5.164	0.273	255	5	fca3	9	17	12.3232			1
24196	(133, 283, 54)	133	283	54	(130, 286, 49)	130	286	49			4.334	5.404	0.736	124	6	fca3	1	0	0.484587	epidermis	off	1
26850	(115, 304, 55)	115	304	55	(128, 311, 48)	128	311	48			3.799	5.277	0.621	117	6	fca3	1	1	0.840552	epidermis	off	1
26142	(133, 332, 53)	133	332	53	(127, 335, 49)	127	335	49			4.285	5.417	0.771	119	6	fca3	1	2	0.140717	epidermis	off	1
26881	(127, 364, 46)	127	364	46	(124, 360, 49)	124	360	49			4.148	5.275	0.772	190	6	fca3	1	3	0.098057	epidermis	off	1
25611	(130, 379, 57)	130	379	57	(124, 385, 50)	124	385	50			4.071	5.201	0.626	134	6	fca3	1	4	1.30219	epidermis	off	1
30287	(123, 404, 57)	123	404	57	(128, 413, 47)	128	413	47			4.343	5.266	0.612	185	6	fca3	1	5	1.83041	epidermis	off	1
29338	(133, 438, 50)	133	438	50	(129, 440, 47)	129	440	47			4.219	5.289	0.835	100	6	fca3	1	6	-0.236305	epidermis	off	1
28803	(115, 464, 52)	115	464	52	(124, 467, 47)	124	467	47			4.607	5.155	0.855	82	6	fca3	1	7	0.233304	epidermis	off	1
35943	(133, 503, 42)	133	503	42	(129, 500, 45)	129	500	45			5.034	5.311	0.936	106	6	fca3	1	8	0.0672051	epidermis	off	1
39045	(120, 528, 50)	120	528	50	(127, 531, 46)	127	531	46			4.827	5.194	0.94	68	6	fca3	1	9	-0.0588936	epidermis	off	1
38012	(116, 564, 46)	116	564	46	(123, 564, 46)	123	564	46			4.903	5.131	0.944	55	6	fca3	1	10	0.0628559	epidermis	off	1
44323	(111, 597, 46)	111	597	46	(123, 599, 46)	123	599	46			5.107	5.192	0.948	41	6	fca3	1	11	0.195131	epidermis	off	1
98901	(128, 651, 43)	128	651	43	(115, 656, 45)	115	656	45			5.345	5.132	0.996	11	6	fca3	1	12	0.234466	epidermis	off	1
118531	(117, 723, 49)	117	723	49	(113, 736, 45)	113	736	45			6.017	5.134	0.902	56	6	fca3	1	13	1.53673	epidermis	on	1
52044	(126, 836, 44)	126	836	44	(126, 818, 46)	126	818	46			4.989	5.034	0.919	77	6	fca3	1	14	0.394727	epidermis	off	1
69024	(128, 874, 45)	128	874	45	(128, 895, 47)	128	895	47			5.021	5.019	0.999	49	6	fca3	1	15	0.00702603	epidermis	off	1
77416	(130, 983, 48)	130	983	48	(130, 973, 50)	130	973	50			4.893	4.941	0.952	43	6	fca3	1	16	0.198706	epidermis	off	1
17099	(182, 202, 35)	182	202	35	(182, 204, 33)	182	204	33			4.402	5.565	0.78	123	6	fca3	2	0	0.0785897	epidermis	off	1
18242	(177, 226, 37)	177	226	37	(179, 230, 33)	179	230	33			4.15	5.609	0.731	128	6	fca3	2	1	0.0681546	epidermis	off	1
14807	(181, 255, 34)	181	255	34	(181, 259, 30)	181	259	30			3.601	5.456	0.661	187	6	fca3	2	2	-0.00819365	epidermis	off	1
19583	(179, 281, 34)	179	281	34	(179, 285, 30)	179	285	30			3.951	5.398	0.763	2001	6	fca3	2	3	-0.219756	epidermis	off	1
35501	(178, 321, 30)	178	321	30	(174, 320, 31)	174	320	31			6.902	5.863	0.927	107	6	fca3	2	4	1.58252	epidermis	on	1
39260	(167, 363, 31)	167	363	31	(168, 367, 31)	168	367	31			5.933	5.62	0.913	125	6	fca3	2	5	0.878357	epidermis	on	1
42605	(176, 432, 26)	176	432	26	(169, 421, 29)	169	421	29			5.413	5.524	0.941	96	6	fca3	2	6	0.228391	epidermis	off	1
43088	(177, 479, 26)	177	479	26	(172, 481, 27)	172	481	27			5.559	5.444	1	39	6	fca3	2	7	0.115	epidermis	off	1
37357	(170, 529, 29)	170	529	29	(174, 534, 27)	174	534	27			5.613	5.466	0.957	62	6	fca3	2	8	0.399204	epidermis	off	1
50921	(171, 582, 27)	171	582	27	(171, 587, 27)	171	587	27			5.599	5.432	0.943	97	6	fca3	2	9	0.505434	epidermis	off	1
39131	(162, 639, 30)	162	639	30	(168, 641, 27)	168	641	27			5.362	5.341	0.951	129	6	fca3	2	10	0.297275	epidermis	off	1
51893	(169, 697, 27)	169	697	27	(166, 695, 28)	166	695	28			5.358	5.309	0.941	52	6	fca3	2	11	0.384943	epidermis	off	1
66849	(168, 761, 33)	168	761	33	(168, 766, 29)	168	766	29			5.391	5.182	0.905	30	6	fca3	2	12	0.774906	epidermis	off	1
65666	(167, 832, 36)	167	832	36	(168, 840, 31)	168	840	31			5.887	5.228	0.925	32	6	fca3	2	13	1.13632	epidermis	might be on	1
74997	(172, 912, 35)	172	912	35	(170, 923, 34)	170	923	34			4.897	4.95	0.967	19	6	fca3	2	14	0.114116	epidermis	off	1
44291	(169, 1008, 37)	169	1008	37	(173, 989, 37)	173	989	37			4.775	4.869	0.514	47	6	fca3	2	15	4.42088			1
12369	(229, 102, 39)	229	102	39	(229, 104, 37)	229	104	37			3.518	5.38	0.672	200	6	fca3	3	0	-0.144881	epidermis	off	1
14017	(223, 121, 40)	223	121	40	(227, 124, 37)	227	124	37			3.547	5.452	0.651	274	6	fca3	3	1	-0.00345929	epidermis	off	1
14158	(224, 140, 41)	224	140	41	(228, 143, 37)	228	143	37			3.346	5.348	0.615	298	6	fca3	3	2	0.0926504	epidermis	off	1
23408	(228, 173, 36)	228	173	36	(227, 173, 36)	227	173	36			6.017	5.811	0.92	87	6	fca3	3	3	0.729217	epidermis	might be on	1
16329	(234, 198, 38)	234	198	38	(228, 200, 35)	228	200	35			3.627	5.354	0.693	138	6	fca3	3	4	-0.120234	epidermis	off	1
14362	(231, 220, 35)	231	220	35	(224, 220, 35)	224	220	35			3.031	5.332	0.557	209	6	fca3	3	5	0.109652	epidermis	off	1
13741	(223, 242, 34)	223	242	34	(223, 241, 34)	223	241	34			3.612	5.638	0.583	237	6	fca3	3	6	0.55754	epidermis	on	1
12451	(224, 262, 32)	224	262	32	(221, 262, 32)	221	262	32			3.196	5.619	0.519	277	6	fca3	3	7	0.538996			1
10883	(229, 278, 34)	229	278	34	(228, 282, 30)	228	282	30			2.99	5.771	0.477	259	6	fca3	3	8	0.497344			1
16211	(230, 294, 37)	230	294	37	(225, 301, 30)	225	301	30			3.152	5.728	0.548	174	6	fca3	3	9	0.0238248			1
29891	(229, 319, 37)	229	319	37	(223, 325, 31)	223	325	31			4.529	5.365	0.817	101	6	fca3	3	10	0.178452	epidermis	off	1
35887	(232, 360, 31)	232	360	31	(222, 359, 31)	222	359	31			4.917	5.386	0.879	81	6	fca3	3	11	0.207857	epidermis	off	1
30103	(220, 396, 24)	220	396	24	(224, 396, 26)	224	396	26			4.865	5.473	0.912	80	6	fca3	3	12	-0.13857	epidermis	off	1
39345	(226, 430, 26)	226	430	26	(220, 427, 28)	220	427	28			4.957	5.37	0.917	51	6	fca3	3	13	0.0356707	epidermis	off	1
42496	(219, 464, 29)	219	464	29	(220, 464, 29)	220	464	29			7.265	5.974	0.968	46	6	fca3	3	14	1.53117	epidermis	on	1
39218	(215, 506, 27)	215	506	27	(220, 505, 27)	220	505	27			5.333	5.483	0.977	72	6	fca3	3	15	-0.0244534	epidermis	off	1
50036	(223, 559, 24)	223	559	24	(222, 551, 28)	222	551	28			5.669	5.498	0.95	84	6	fca3	3	16	0.469368	epidermis	off	1
52089	(229, 609, 23)	229	609	23	(219, 599, 29)	219	599	29			5.567	5.481	0.999	50	6	fca3	3	17	0.0915726	epidermis	off	1
54338	(230, 655, 23)	230	655	23	(218, 648, 28)	218	648	28			5.436	5.416	0.997	34	6	fca3	3	18	0.0363571	epidermis	off	1
57658	(225, 704, 24)	225	704	24	(216, 699, 28)	216	699	28			5.393	5.441	1	33	6	fca3	3	19	-0.048	epidermis	off	1
64078	(231, 769, 24)	231	769	24	(218, 755, 29)	218	755	29			5.103	5.17	0.998	31	6	fca3	3	20	-0.0567735	epidermis	off	1
73874	(213, 808, 36)	213	808	36	(217, 813, 31)	217	813	31			5.215	5.11	0.992	21	6	fca3	3	21	0.147056	epidermis	off	1
78911	(225, 876, 32)	225	876	32	(214, 881, 36)	214	881	36			5.181	5.168	0.964	24	6	fca3	3	22	0.206481	epidermis	off	1
93801	(212, 940, 36)	212	940	36	(218, 962, 38)	218	962	38			5.169	5.104	1	12	6	fca3	3	23	0.065	epidermis	off	1
11569	(220, 1008, 44)	220	1008	44	(220, 1007, 47)	220	1007	47			2.316	4.958	0.044	271	6	fca3	3	24	47.6784			1
12622	(264, 14, 43)	264	14	43	(265, 15, 42)	265	15	42			4.865	5.853	0.782	173	6	fca3	4	0	0.368228	epidermis	on	1
12606	(269, 42, 41)	269	42	41	(268, 43, 40)	268	43	40			4.063	5.447	0.768	180	6	fca3	4	1	-0.156635	epidermis	off	1
13544	(265, 67, 41)	265	67	41	(268, 67, 40)	268	67	40			3.964	5.399	0.75	188	6	fca3	4	2	-0.113667	epidermis	off	1
18302	(268, 95, 41)	268	95	41	(269, 94, 40)	269	94	40			5.149	5.571	0.85	226	6	fca3	4	3	0.486647	epidermis	on	1
16503	(273, 125, 39)	273	125	39	(271, 125, 38)	271	125	38			4.654	5.443	0.853	150	6	fca3	4	4	0.0130375	epidermis	off	1
15298	(267, 153, 38)	267	153	38	(268, 154, 37)	268	154	37			4.475	5.544	0.787	163	6	fca3	4	5	0.14215	epidermis	off	1
18825	(265, 182, 38)	265	182	38	(268, 182, 37)	268	182	37			4.735	5.411	0.852	194	6	fca3	4	6	0.146512	epidermis	off	1
23287	(266, 222, 35)	266	222	35	(268, 223, 34)	268	223	34			5.799	5.803	0.927	199	6	fca3	4	7	0.452663	epidermis	on	1
27821	(263, 267, 32)	263	267	32	(266, 265, 33)	266	265	33			5.213	5.446	0.998	74	6	fca3	4	8	-0.222553	epidermis	off	1
23091	(266, 311, 28)	266	311	28	(267, 309, 29)	267	309	29			5.14	5.39	0.956	103	6	fca3	4	9	-0.013431	epidermis	off	1
22811	(266, 350, 27)	266	350	27	(267, 346, 29)	267	346	29			5.534	5.747	0.944	90	6	fca3	4	10	0.115288	epidermis	might be on	1
31799	(269, 394, 26)	269	394	26	(269, 390, 28)	269	390	28			6.007	5.719	0.967	79	6	fca3	4	11	0.492996	epidermis	on	1
30985	(264, 436, 28)	264	436	28	(266, 434, 29)	266	434	29			6.024	5.674	0.928	93	6	fca3	4	12	0.817379	epidermis	on	1
50066	(266, 490, 26)	266	490	26	(266, 496, 27)	266	496	27			6.283	5.598	0.974	69	6	fca3	4	13	0.852719	epidermis	on	1
28359	(269, 569, 27)	269	569	27	(266, 566, 28)	266	566	28			5.423	5.423	0.92	159	6	fca3	4	14	0.471565	epidermis	off	1
31089	(263, 614, 28)	263	614	28	(263, 617, 29)	263	617	29			5.226	5.432	0.92	86	6	fca3	4	15	0.248435	epidermis	off	1
81853	(261, 707, 29)	261	707	29	(263, 704, 30)	263	704	30			6.298	5.434	0.923	59	6	fca3	4	16	1.3894	epidermis	on	1
110795	(258, 832, 38)	258	832	38	(264, 833, 35)	264	833	35			6.428	5.11	0.914	38	6	fca3	4	17	1.92282	epidermis	on	1
92762	(263, 986, 40)	263	986	40	(265, 959, 39)	265	959	39			5.404	4.991	0.983	25	6	fca3	4	18	0.506457	epidermis	off	1
9512	(300, 29, 56)	300	29	56	(297, 28, 54)	297	28	54			3.772	5.168	0.591	253	6	fca3	5	0	1.2144	epidermis	off	1
13174	(302, 49, 57)	302	49	57	(295, 49, 54)	295	49	54			3.669	5.186	0.538	205	6	fca3	5	1	1.6337			1
17653	(304, 69, 59)	304	69	59	(296, 72, 54)	296	72	54			4.079	5.12	0.495	161	6	fca3	5	2	3.1204			1
18200	(301, 96, 57)	301	96	57	(296, 97, 53)	296	97	53			4.461	5.232	0.629	261	6	fca3	5	3	1.86021	epidermis	off	1
15423	(300, 121, 58)	300	121	58	(296, 124, 53)	296	124	53			4.075	5.209	0.536	165	6	fca3	5	4	2.39361			1
17780	(303, 147, 56)	303	147	56	(295, 148, 52)	295	148	52			4.182	5.138	0.673	160	6	fca3	5	5	1.07597	epidermis	off	1
16252	(305, 170, 56)	305	170	56	(297, 171, 52)	297	171	52			3.673	5.118	0.599	155	6	fca3	5	6	1.01389	epidermis	off	1
22892	(303, 190, 59)	303	190	59	(293, 193, 51)	293	193	51			4.466	5.175	0.52	153	6	fca3	5	7	3.41346			1
23767	(295, 221, 52)	295	221	52	(292, 221, 51)	292	221	51			4.744	5.249	0.881	229	6	fca3	5	8	0.13579	epidermis	off	1
26029	(299, 253, 52)	299	253	52	(295, 253, 49)	295	253	49			5.221	5.281	0.954	118	6	fca3	5	9	0.191746	epidermis	off	1
24536	(285, 283, 49)	285	283	49	(292, 284, 48)	292	284	48			4.644	5.316	0.865	211	6	fca3	5	10	0.0527861	epidermis	off	1
27221	(298, 315, 46)	298	315	46	(296, 312, 47)	296	312	47			4.763	5.238	0.928	92	6	fca3	5	11	-0.105457	epidermis	off	1
43645	(301, 356, 46)	301	356	46	(293, 349, 48)	293	349	48			5.212	5.221	0.982	65	6	fca3	5	12	0.0865356	epidermis	off	1
23858	(301, 384, 50)	301	384	50	(293, 385, 47)	293	385	47			4.136	5.217	0.783	126	6	fca3	5	13	0.0652478	epidermis	off	1
23321	(301, 408, 51)	301	408	51	(293, 409, 48)	293	409	48			4.338	5.229	0.804	139	6	fca3	5	14	0.166522	epidermis	off	1
25923	(296, 439, 46)	296	439	46	(292, 437, 47)	292	437	47			4.387	5.233	0.845	91	6	fca3	5	15	-0.041284	epidermis	off	1
29318	(301, 458, 57)	301	458	57	(293, 464, 47)	293	464	47			4.66	5.271	0.654	109	6	fca3	5	16	1.85438	epidermis	off	1
32508	(298, 487, 57)	298	487	57	(292, 493, 47)	292	493	47			4.999	5.335	0.652	105	6	fca3	5	17	2.33218	epidermis	off	1
34947	(301, 522, 51)	301	522	51	(292, 524, 46)	292	524	46			5.071	5.235	0.925	70	6	fca3	5	18	0.247162	epidermis	off	1
56234	(299, 577, 43)	299	577	43	(291, 567, 47)	291	567	47			5.296	5.296	0.999	37	6	fca3	5	19	0.0053013	epidermis	off	1
54134	(297, 631, 43)	297	631	43	(290, 620, 47)	290	620	47			5.469	5.34	0.985	35	6	fca3	5	20	0.212284	epidermis	off	1
74319	(294, 690, 45)	294	690	45	(287, 677, 49)	287	677	49			5.337	5.257	0.999	23	6	fca3	5	21	0.0853423	epidermis	off	1
60618	(295, 727, 51)	295	727	51	(288, 740, 51)	288	740	51			5.117	5.148	0.995	29	6	fca3	5	22	-0.00528643	epidermis	off	1
59801	(294, 822, 54)	294	822	54	(288, 808, 53)	288	808	53			5.088	5.165	0.901	60	6	fca3	5	23	0.482059	epidermis	off	1
79937	(296, 883, 57)	296	883	57	(286, 886, 54)	286	886	54			5.007	5.047	0.748	16	6	fca3	5	24	1.64685	epidermis	off	1
95344	(287, 963, 60)	287	963	60	(298, 971, 54)	298	971	54			4.769	4.716	0.512	27	6	fca3	5	25	4.59845			1
15665	(251, 96, 60)	251	96	60	(248, 98, 54)	248	98	54			4.181	5.348	0.405	177	6	fca3	6	0	4.97546			1
15928	(258, 118, 57)	258	118	57	(252, 118, 54)	252	118	54			4.337	5.366	0.557	246	6	fca3	6	1	2.42036	cortex	on	1
8937	(242, 136, 55)	242	136	55	(248, 136, 54)	248	136	54			2.889	5.284	0.482	451	6	fca3	6	2	0.709776			1
15334	(257, 148, 60)	257	148	60	(247, 152, 53)	247	152	53			3.363	5.347	0.346	254	6	fca3	6	3	4.37265			1
12246	(248, 166, 60)	248	166	60	(247, 168, 55)	247	168	55			3.466	5.498	0.337	231	6	fca3	6	4	4.78687			1
12462	(253, 185, 56)	253	185	56	(248, 185, 53)	248	185	53			3.784	5.369	0.517	248	6	fca3	6	5	1.95015			1
14229	(257, 202, 58)	257	202	58	(249, 203, 54)	249	203	54			4.553	5.834	0.473	221	6	fca3	6	6	3.79179			1
22568	(249, 220, 60)	249	220	60	(246, 222, 53)	246	222	53			5.636	6.06	0.452	120	6	fca3	6	7	6.40903			1
25724	(237, 247, 54)	237	247	54	(243, 248, 52)	243	248	52			4.787	5.241	0.843	98	6	fca3	6	8	0.437529	cortex	off	1
29470	(250, 276, 53)	250	276	53	(247, 276, 52)	247	276	52			4.909	5.129	0.93	85	6	fca3	6	9	0.149495	cortex	off	1
25763	(252, 303, 54)	252	303	54	(248, 303, 51)	248	303	51			4.409	5.259	0.754	122	6	fca3	6	10	0.58848	cortex	off	1
26083	(239, 322, 59)	239	322	59	(245, 325, 52)	245	325	52			4.634	5.245	0.506	142	6	fca3	6	11	3.9131			1
25152	(255, 347, 55)	255	347	55	(248, 350, 51)	248	350	51			4.232	5.178	0.711	145	6	fca3	6	12	0.77418	cortex	off	1
28763	(232, 365, 60)	232	365	60	(245, 371, 52)	245	371	52			3.989	5.239	0.375	305	6	fca3	6	13	5.39833			1
58954	(250, 407, 53)	250	407	53	(243, 407, 51)	243	407	51			5.412	5.158	0.932	45	6	fca3	6	14	0.648867	cortex	off	1
34297	(255, 443, 56)	255	443	56	(245, 445, 52)	245	445	52			4.971	5.249	0.763	83	6	fca3	6	15	1.26607	cortex	off	1
42355	(240, 472, 57)	240	472	57	(242, 477, 51)	242	477	51			5.231	5.15	0.706	99	6	fca3	6	16	2.25935	cortex	off	1
42299	(234, 509, 56)	234	509	56	(243, 513, 49)	243	513	49			4.902	5.048	0.78	66	6	fca3	6	17	1.23662	cortex	off	1
37113	(234, 541, 53)	234	541	53	(244, 541, 51)	244	541	51			4.899	5.025	0.902	113	6	fca3	6	18	0.406264	cortex	off	1
81703	(237, 595, 59)	237	595	59	(241, 589, 52)	241	589	52			5.777	5.172	0.57	58	6	fca3	6	19	4.96309	cortex	on	1
79963	(244, 657, 52)	244	657	52	(238, 652, 52)	238	652	52			5.706	5.081	0.907	121	6	fca3	6	20	1.21007	cortex	on	1
97317	(235, 713, 52)	235	713	52	(235, 726, 52)	235	726	52			4.959	4.962	0.979	13	6	fca3	6	21	0.103373	cortex	off	1
97292	(245, 807, 58)	245	807	58	(235, 805, 54)	235	805	54			5.022	4.963	0.634	36	6	fca3	6	22	2.95814	cortex	might be on	1
96801	(244, 901, 60)	244	901	60	(235, 905, 55)	235	905	55			5.121	4.907	0.504	71	6	fca3	6	23	5.25371			1
51792	(241, 978, 60)	241	978	60	(239, 986, 56)	239	986	56			4.673	5.004	0.515	48	6	fca3	6	24	4.06979			1
22245	(203, 145, 60)	203	145	60	(196, 147, 54)	196	147	54			4.443	5.163	0.462	144	6	fca3	7	0	4.45388			1
23850	(189, 167, 59)	189	167	59	(194, 172, 53)	194	172	53			3.978	5.074	0.5	116	6	fca3	7	1	2.882			1
24275	(201, 190, 59)	201	190	59	(193, 193, 53)	193	193	53			4.151	5.088	0.496	114	6	fca3	7	2	3.28095			1
20906	(193, 214, 57)	193	214	57	(193, 216, 53)	193	216	53			4.194	5.111	0.618	148	6	fca3	7	3	1.67541	cortex	off	1
27349	(183, 240, 57)	183	240	57	(191, 242, 52)	191	242	52			4.952	5.242	0.677	181	6	fca3	7	4	2.07262	cortex	might be on	1
30433	(180, 267, 55)	180	267	55	(188, 269, 51)	188	269	51			4.623	5.258	0.741	168	6	fca3	7	5	0.980866	cortex	off	1
25097	(200, 291, 53)	200	291	53	(189, 291, 52)	189	291	52			4.045	5.253	0.764	110	6	fca3	7	6	0.0415026	cortex	off	1
28949	(195, 309, 60)	195	309	60	(185, 314, 52)	185	314	52			4.507	5.074	0.475	94	6	fca3	7	7	4.41442			1
34706	(195, 341, 55)	195	341	55	(185, 342, 52)	185	342	52			4.917	5.077	0.839	78	6	fca3	7	8	0.783548	cortex	off	1
47694	(200, 381, 45)	200	381	45	(185, 375, 49)	185	375	49			4.924	5.045	0.958	40	6	fca3	7	9	0.0948747	cortex	off	1
27998	(181, 395, 60)	181	395	60	(181, 400, 51)	181	400	51			4.353	5.117	0.439	182	6	fca3	7	10	4.79872			1
39515	(197, 426, 53)	197	426	53	(183, 426, 50)	183	426	50			4.841	5.095	0.909	53	6	fca3	7	11	0.230633	cortex	off	1
40847	(194, 454, 56)	194	454	56	(184, 457, 51)	184	457	51			4.937	5.075	0.757	73	6	fca3	7	12	1.4468	cortex	off	1
50839	(191, 496, 47)	191	496	47	(182, 491, 50)	182	491	50			4.946	5.033	0.972	63	6	fca3	7	13	0.0554774	cortex	off	1
42554	(191, 520, 58)	191	520	58	(183, 525, 50)	183	525	50			5.007	5.069	0.653	67	6	fca3	7	14	2.59869	cortex	off	1
49285	(191, 560, 50)	191	560	50	(181, 558, 50)	181	558	50			4.923	5.04	0.942	104	6	fca3	7	15	0.186115	cortex	off	1
97701	(175, 614, 53)	175	614	53	(178, 611, 50)	178	611	50			5.187	5.06	0.935	20	6	fca3	7	16	0.487594	cortex	off	1
107529	(175, 680, 53)	175	680	53	(174, 676, 51)	174	676	51			5.829	5.103	0.955	18	6	fca3	7	17	1.00066	cortex	on	1
107861	(175, 747, 52)	175	747	52	(172, 746, 51)	172	746	51			5.602	4.973	0.975	9	6	fca3	7	18	0.772641	cortex	on	1
95230	(169, 822, 57)	169	822	57	(175, 819, 53)	175	819	53			7.987	5.073	0.746	15	6	fca3	7	19	5.63343	cortex	on	1
103479	(182, 912, 57)	182	912	57	(176, 904, 54)	176	904	54			4.845	4.826	0.746	10	6	fca3	7	20	1.66864	cortex	off	1
74885	(177, 999, 60)	177	999	60	(184, 982, 55)	184	982	55			4.646	4.741	0.47	22	6	fca3	7	21	5.14411			1
19162	(89, 396, 60)	89	396	60	(87, 398, 58)	87	398	58			3.911	5.394	0.3	207	6	fca3	8	0	7.64267			1
26603	(87, 458, 60)	87	458	60	(85, 459, 57)	85	459	57			5.069	5.254	0.412	227	6	fca3	8	1	7.0494			1
46528	(85, 533, 60)	85	533	60	(84, 533, 57)	84	533	57			4.967	5.2	0.441	136	6	fca3	8	2	6.06304			1
38148	(75, 612, 60)	75	612	60	(80, 618, 57)	80	618	57			4.007	5.187	0.331	203	6	fca3	8	3	6.91874			1
28688	(80, 674, 60)	80	674	60	(79, 686, 58)	79	686	58			3.515	5.182	0.239	256	6	fca3	8	4	9.52511			1
74057	(92, 811, 59)	92	811	59	(88, 815, 54)	88	815	54			4.902	4.948	0.561	115	6	fca3	8	5	3.78997	epidermis	off	1
82238	(92, 900, 60)	92	900	60	(89, 921, 54)	89	921	54			4.771	4.797	0.498	28	6	fca3	8	6	4.78332			1
24924	(94, 1006, 60)	94	1006	60	(93, 996, 56)	93	996	56			4.35	4.735	0.33	112	6	fca3	8	7	8.44682			1
8959	(143, 296, 76)	143	296	76	(145, 294, 74)	145	294	74			2.231	5.541	0.106	402	7	fca3	1	0	15.5062			1
15547	(143, 347, 76)	143	347	76	(145, 342, 74)	145	342	74			3.492	5.151	0.243	384	7	fca3	1	1	9.21937			1
23733	(141, 409, 76)	141	409	76	(141, 397, 73)	141	397	73			4.323	5.197	0.377	263	7	fca3	1	2	6.26984			1
38353	(143, 456, 75)	143	456	75	(144, 460, 71)	144	460	71			5.254	5.141	0.555	216	7	fca3	1	3	4.32567			1
47271	(142, 519, 74)	142	519	74	(143, 525, 70)	143	525	70			5.16	5.128	0.648	151	7	fca3	1	4	2.83496			1
51784	(144, 595, 73)	144	595	73	(141, 592, 69)	141	592	69			5.192	5.041	0.669	128	7	fca3	1	5	2.71984			1
51161	(141, 652, 72)	141	652	72	(139, 668, 68)	139	668	68			5.078	5.067	0.746	69	7	fca3	1	6	1.73997			1
69666	(144, 764, 71)	144	764	71	(142, 741, 67)	142	741	67			4.939	4.985	0.827	38	7	fca3	1	7	0.987189			1
143049	(150, 856, 72)	150	856	72	(147, 859, 68)	147	859	68			5.176	4.99	0.748	58	7	fca3	1	8	1.92979			1
57175	(152, 962, 75)	152	962	75	(152, 979, 69)	152	979	69			4.761	4.817	0.571	207	7	fca3	1	9	3.521			1
14255	(186, 128, 76)	186	128	76	(185, 129, 72)	185	129	72			3.897	5.284	0.374	347	7	fca3	2	0	5.13579			1
19824	(189, 154, 76)	189	154	76	(185, 154, 72)	185	154	72			4.595	5.081	0.495	231	7	fca3	2	1	4.20183			1
18421	(180, 178, 76)	180	178	76	(185, 179, 71)	185	179	71			4.307	5.057	0.457	201	7	fca3	2	2	4.36751			1
16180	(189, 203, 76)	189	203	76	(183, 201, 71)	183	201	71			3.699	5.09	0.401	233	7	fca3	2	3	4.13444			1
12997	(191, 222, 74)	191	222	74	(187, 220, 69)	187	220	69			3.106	5.119	0.41	259	7	fca3	2	4	2.45661			1
14140	(174, 234, 76)	174	234	76	(182, 235, 69)	182	235	69			3.47	5.061	0.364	275	7	fca3	2	5	4.47197			1
12818	(184, 254, 76)	184	254	76	(182, 252, 69)	182	252	69			3.083	5.104	0.325	266	7	fca3	2	6	4.38215			1
11961	(173, 267, 73)	173	267	73	(180, 268, 68)	180	268	68			3.05	5.111	0.441	331	7	fca3	2	7	1.8051			1
23878	(177, 289, 71)	177	289	71	(182, 289, 68)	182	289	68			4.549	5.091	0.77	144	7	fca3	2	8	0.816792			1
28126	(185, 317, 66)	185	317	66	(183, 316, 67)	183	316	67			5.095	5.156	0.979	98	7	fca3	2	9	0.0482901			1
30356	(170, 346, 74)	170	346	74	(180, 347, 66)	180	347	66			4.872	5.013	0.651	100	7	fca3	2	10	2.47087			1
35825	(168, 377, 74)	168	377	74	(180, 378, 65)	180	378	65			4.887	5.017	0.656	63	7	fca3	2	11	2.4327			1
30375	(171, 407, 76)	171	407	76	(179, 407, 64)	179	407	64			4.738	5.025	0.496	83	7	fca3	2	12	4.52742			1
34516	(172, 434, 64)	172	434	64	(180, 435, 62)	180	435	62			4.918	5.077	0.973	55	7	fca3	2	13	-0.0225293			1
34330	(182, 467, 55)	182	467	55	(181, 468, 60)	181	468	60			4.995	4.975	0.994	57	7	fca3	2	14	0.0501509		off	1
42652	(172, 500, 62)	172	500	62	(181, 501, 60)	181	501	60			4.956	5.003	0.997	40	7	fca3	2	15	-0.0320873		off	1
43048	(196, 536, 53)	196	536	53	(185, 535, 59)	185	535	59			4.941	5.026	0.98	59	7	fca3	2	16	0.0158367		off	1
40442	(189, 567, 52)	189	567	52	(186, 568, 58)	186	568	58			5.071	5.106	0.923	135	7	fca3	2	17	0.388041		off	1
51410	(187, 602, 51)	187	602	51	(185, 605, 57)	185	605	57			5.133	5.104	0.973	42	7	fca3	2	18	0.171437		off	1
49620	(185, 645, 52)	185	645	52	(184, 647, 57)	184	647	57			5.051	5.11	0.989	31	7	fca3	2	19	-0.00282103		off	1
51602	(194, 686, 51)	194	686	51	(186, 690, 57)	186	690	57			4.971	4.994	0.992	32	7	fca3	2	20	0.0170887		off	1
48670	(191, 728, 52)	191	728	52	(189, 734, 56)	189	734	56			4.979	5.002	1	34	7	fca3	2	21	-0.023		off	1
84319	(193, 800, 56)	193	800	56	(190, 802, 54)	190	802	54			5.832	5.216	0.902	51	7	fca3	2	22	1.24963		on	1
88954	(202, 877, 52)	202	877	52	(194, 880, 56)	194	880	56			5.563	5.13	0.921	67	7	fca3	2	23	0.910174		on	1
97527	(201, 954, 60)	201	954	60	(198, 960, 59)	198	960	59			5.383	5.116	0.938	71	7	fca3	2	24	0.622806		on	1
24841	(213, 1008, 56)	213	1008	56	(203, 1004, 59)	203	1004	59			4.136	5.18	0.334	274	7	fca3	2	25	7.20323			1
24035	(219, 130, 62)	219	130	62	(217, 130, 62)	217	130	62			5.471	5.353	0.988	109	7	fca3	3	0	0.184449		might be on	1
28046	(220, 168, 57)	220	168	57	(216, 167, 61)	216	167	61			5.208	5.194	0.996	75	7	fca3	3	1	0.0349157		off	1
29189	(221, 203, 54)	221	203	54	(217, 205, 58)	217	205	58			5.132	5.283	0.97	140	7	fca3	3	2	0.00772165		off	1
30120	(219, 246, 52)	219	246	52	(217, 246, 54)	217	246	54			5.501	5.34	0.951	156	7	fca3	3	3	0.444437		might be on	1
33808	(224, 286, 47)	224	286	47	(218, 288, 50)	218	288	50			5.195	5.259	0.951	192	7	fca3	3	4	0.203671			1
22011	(223, 326, 46)	223	326	46	(219, 326, 48)	219	326	48			5.005	5.274	0.919	248	7	fca3	3	5	0.172137		off	1
18675	(221, 354, 46)	221	354	46	(218, 354, 47)	218	354	47			4.754	5.265	0.877	246	7	fca3	3	6	0.155753		off	1
20189	(223, 383, 45)	223	383	45	(219, 383, 46)	219	383	46			4.83	5.252	0.906	221	7	fca3	3	7	0.0791258		off	1
22725	(221, 414, 46)	221	414	46	(219, 412, 45)	219	412	45			5.089	5.259	0.936	247	7	fca3	3	8	0.177966		off	1
34440	(223, 462, 40)	223	462	40	(222, 460, 41)	222	460	41			5.133	5.3	0.957	110	7	fca3	3	9	0.0636364			1
47164	(230, 534, 35)	230	534	35	(224, 521, 39)	224	521	39			5.238	5.298	0.954	179	7	fca3	3	10	0.192566		off	1
51374	(229, 583, 36)	229	583	36	(228, 591, 37)	228	591	37			5.243	5.305	0.927	101	7	fca3	3	11	0.350879			1
51834	(234, 657, 30)	234	657	30	(230, 660, 34)	230	660	34			5.142	5.21	0.937	41	7	fca3	3	12	0.277727		off	1
58757	(235, 711, 32)	235	711	32	(233, 734, 33)	233	734	33			5.146	5.18	0.986	54	7	fca3	3	13	0.0390669			1
60761	(241, 817, 32)	241	817	32	(237, 821, 34)	237	821	34			5.495	5.304	0.904	91	7	fca3	3	14	0.77454		on	1
55918	(243, 916, 38)	243	916	38	(242, 922, 38)	242	922	38			5.453	5.25	0.905	99	7	fca3	3	15	0.775414		on	1
31587	(247, 987, 41)	247	987	41	(248, 991, 41)	248	991	41			5.03	5.164	0.917	119	7	fca3	3	16	0.321278			1
10002	(252, 155, 55)	252	155	55	(251, 155, 56)	251	155	56			4.184	5.432	0.708	467	7	fca3	4	0	0.477605		might be on	1
9459	(254, 179, 52)	254	179	52	(253, 178, 52)	253	178	52			4.348	5.415	0.766	308	7	fca3	4	1	0.26124		might be on	1
21284	(254, 217, 50)	254	217	50	(254, 214, 51)	254	214	51			4.787	5.361	0.91	111	7	fca3	4	2	-0.10056		off	1
21776	(257, 268, 47)	257	268	47	(256, 261, 47)	256	261	47			5.187	5.572	0.893	358	7	fca3	4	3	0.236511		might be on	1
24964	(257, 310, 45)	257	310	45	(257, 307, 45)	257	307	45			5.251	5.436	0.939	116	7	fca3	4	4	0.156119		off	1
31665	(257, 361, 43)	257	361	43	(257, 361, 44)	257	361	44			5.226	5.38	0.877	161	7	fca3	4	5	0.578951		on	1
26245	(258, 415, 41)	258	415	41	(258, 416, 41)	258	416	41			5.29	5.483	0.815	230	7	fca3	4	6	1.0078		on	1
27189	(258, 473, 38)	258	473	38	(258, 471, 38)	258	471	38			5.089	5.484	0.862	113	7	fca3	4	7	0.419712		on	1
26186	(264, 515, 34)	264	515	34	(262, 521, 36)	262	521	36			4.685	5.499	0.811	160	7	fca3	4	8	0.277819		off	1
30982	(264, 577, 35)	264	577	35	(263, 580, 36)	263	580	36			5.326	5.608	0.822	150	7	fca3	4	9	0.871319		on	1
33497	(263, 638, 36)	263	638	36	(265, 639, 35)	265	639	35			5.455	5.451	0.837	126	7	fca3	4	10	1.06632		on	1
35467	(267, 705, 34)	267	705	34	(269, 706, 32)	269	706	32			6.197	5.502	0.809	193	7	fca3	4	11	2.15807		on	1
40404	(270, 774, 34)	270	774	34	(274, 775, 31)	274	775	31			5.858	5.373	0.831	205	7	fca3	4	12	1.67634		on	1
56682	(278, 866, 29)	278	866	29	(281, 864, 27)	281	864	27			5.658	5.25	0.948	25	7	fca3	4	13	0.718354		on	1
70165	(283, 956, 34)	283	956	34	(288, 959, 31)	288	959	31			5.441	5.211	0.888	112	7	fca3	4	14	0.916252		on	1
12374	(323, 226, 53)	323	226	53	(319, 225, 56)	319	225	56			4.3	5.467	0.804	255	7	fca3	5	0	-0.118741		off	1
15044	(324, 253, 52)	324	253	52	(321, 252, 55)	321	252	55			4.764	5.332	0.896	197	7	fca3	5	1	-0.0150357		off	1
15586	(328, 280, 51)	328	280	51	(324, 279, 55)	324	279	55			4.782	5.308	0.862	352	7	fca3	5	2	0.239564		might be on	1
16973	(326, 309, 52)	326	309	52	(327, 309, 52)	327	309	52			6.185	5.786	0.897	327	7	fca3	5	3	1.10921		on	1
15621	(329, 341, 48)	329	341	48	(327, 339, 49)	327	339	49			6.468	5.901	0.973	185	7	fca3	5	4	0.746482		on	1
20841	(329, 375, 47)	329	375	47	(326, 374, 50)	326	374	50			5.43	5.348	0.978	158	7	fca3	5	5	0.204147		might be on	1
23194	(331, 411, 46)	331	411	46	(327, 412, 49)	327	412	49			5.181	5.311	0.979	118	7	fca3	5	6	-0.0188652		off	1
44433	(327, 463, 48)	327	463	48	(329, 465, 47)	329	465	47			9.454	5.9	0.938	127	7	fca3	5	7	4.17889		on	1
32830	(330, 524, 45)	330	524	45	(330, 529, 45)	330	529	45			5.956	5.412	0.93	122	7	fca3	5	8	0.992301		on	1
31320	(329, 584, 47)	329	584	47	(328, 588, 47)	328	588	47			5.873	5.516	0.886	72	7	fca3	5	9	1.11267		on	1
31673	(331, 635, 45)	331	635	45	(332, 638, 44)	332	638	44			6.131	5.519	0.841	257	7	fca3	5	10	1.77113		on	1
68977	(334, 709, 44)	334	709	44	(337, 715, 42)	337	715	42			7.066	5.43	0.939	23	7	fca3	5	11	2.09503		on	1
72777	(336, 802, 45)	336	802	45	(342, 812, 41)	342	812	41			6.144	5.22	0.838	68	7	fca3	5	12	2.11174		on	1
72916	(349, 880, 42)	349	880	42	(349, 917, 46)	349	917	46			4.942	5.17	0.945	143	7	fca3	5	13	0.0596296		sphere position	1
28799	(357, 994, 47)	357	994	47	(356, 994, 47)	356	994	47			4.728	5.221	0.916	236	7	fca3	5	14	-0.0594279		sphere position	1
15537	(333, 220, 76)	333	220	76	(341, 221, 69)	341	221	69			3.767	5.154	0.391	225	7	fca3	6	0	4.48027			1
15552	(335, 241, 76)	335	241	76	(343, 241, 69)	343	241	69			3.799	5.169	0.402	219	7	fca3	6	1	4.28125			1
25877	(338, 268, 74)	338	268	74	(341, 269, 69)	341	269	69			4.958	5.207	0.666	129	7	fca3	6	2	2.23744		off	1
21784	(343, 299, 71)	343	299	71	(343, 297, 68)	343	297	68			4.857	5.285	0.796	273	7	fca3	6	3	0.816759			1
23064	(348, 331, 69)	348	331	69	(345, 332, 67)	345	332	67			5.59	5.441	0.909	180	7	fca3	6	4	0.708615		on	1
25914	(345, 367, 67)	345	367	67	(344, 368, 67)	344	368	67			5.564	5.28	0.988	96	7	fca3	6	5	0.351579		on	1
24280	(347, 412, 67)	347	412	67	(345, 408, 65)	345	408	65			4.991	5.232	0.986	90	7	fca3	6	6	-0.170134		off	1
23487	(345, 447, 66)	345	447	66	(342, 447, 65)	342	447	65			5.168	5.187	0.992	103	7	fca3	6	7	0.0226774		off	1
52406	(344, 507, 65)	344	507	65	(344, 507, 64)	344	507	64			5.003	5.161	0.986	53	7	fca3	6	8	-0.0869635		off	1
57142	(342, 588, 66)	342	588	66	(349, 588, 62)	349	588	62			5.147	5.203	0.922	198	7	fca3	6	9	0.37943		might be on	1
57166	(349, 652, 59)	349	652	59	(354, 662, 58)	354	662	58			5.125	5.137	0.878	64	7	fca3	6	10	0.70013		off	1
65290	(367, 716, 54)	367	716	54	(359, 742, 57)	359	742	57			5.033	5.101	0.993	66	7	fca3	6	11	-0.0325206		off	1
59288	(365, 809, 57)	365	809	57	(362, 821, 57)	362	821	57			4.935	5.085	0.964	49	7	fca3	6	12	0.0342946		off	1
69621	(378, 897, 55)	378	897	55	(372, 918, 59)	372	918	59			4.769	4.968	0.925	94	7	fca3	6	13	0.187676		off	1
41430	(368, 1001, 70)	368	1001	70	(376, 992, 63)	376	992	63			4.864	4.933	0.714	47	7	fca3	6	14	1.87932		off	1
18375	(288, 227, 52)	288	227	52	(284, 227, 56)	284	227	56			4.158	5.251	0.81	190	7	fca3	7	0	-0.117667		off	1
16791	(287, 250, 52)	287	250	52	(283, 249, 55)	283	249	55			3.863	5.229	0.758	165	7	fca3	7	1	-0.132694		off	1
15308	(290, 272, 52)	290	272	52	(286, 271, 54)	286	271	54			3.897	5.246	0.767	209	7	fca3	7	2	-0.165166		off	1
22182	(284, 294, 55)	284	294	55	(286, 294, 54)	286	294	54			4.458	5.218	0.864	164	7	fca3	7	3	-0.0582778		off	1
29436	(291, 324, 50)	291	324	50	(289, 324, 52)	289	324	52			5.897	5.439	0.994	85	7	fca3	7	4	0.493596		on	1
27035	(290, 355, 49)	290	355	49	(289, 354, 51)	289	354	51			5.346	5.31	0.96	77	7	fca3	7	5	0.25875		on	1
24564	(294, 384, 46)	294	384	46	(289, 384, 49)	289	384	49			5.144	5.299	0.95	80	7	fca3	7	6	0.115737		might be on	1
24524	(290, 411, 47)	290	411	47	(287, 411, 48)	287	411	48			4.765	5.255	0.88	188	7	fca3	7	7	0.159773		might be on	1
24853	(284, 438, 48)	284	438	48	(288, 437, 47)	288	437	47			4.561	5.27	0.905	76	7	fca3	7	8	-0.230221		off	1
23592	(296, 463, 41)	296	463	41	(288, 463, 46)	288	463	46			4.731	5.414	0.876	157	7	fca3	7	9	-0.0133151		might be on	1
26358	(288, 490, 46)	288	490	46	(288, 490, 46)	288	490	46			5.359	5.422	0.905	132	7	fca3	7	10	0.499547		on	1
32783	(295, 519, 44)	295	519	44	(289, 518, 46)	289	518	46			5.607	5.354	0.985	60	7	fca3	7	11	0.338386		on	1
26567	(295, 549, 41)	295	549	41	(290, 548, 44)	290	548	44			4.991	5.314	0.888	194	7	fca3	7	12	0.306495		might be on	1
27117	(300, 577, 39)	300	577	39	(292, 576, 44)	292	576	44			5.064	5.317	0.913	200	7	fca3	7	13	0.22955		might be on	1
64200	(291, 621, 45)	291	621	45	(292, 623, 46)	292	623	46			7.621	5.71	0.927	87	7	fca3	7	14	2.51114		on	1
68962	(302, 682, 38)	302	682	38	(297, 687, 42)	297	687	42			5.61	5.293	0.927	82	7	fca3	7	15	0.75878		on	1
73665	(299, 751, 42)	299	751	42	(298, 758, 43)	298	758	43			6.69	5.497	0.93	141	7	fca3	7	16	1.69655		on	1
59741	(309, 836, 37)	309	836	37	(302, 833, 42)	302	833	42			5.285	5.24	0.922	131	7	fca3	7	17	0.492104		might be on	1
62380	(315, 883, 38)	315	883	38	(308, 893, 43)	308	893	43			5.326	5.255	0.947	78	7	fca3	7	18	0.369076		off	1
67220	(304, 954, 50)	304	954	50	(314, 956, 45)	314	956	45			5.006	5.075	0.928	46	7	fca3	7	19	0.319397		off	1
33824	(312, 1008, 49)	312	1008	49	(318, 1000, 45)	318	1000	45			5.077	5.243	0.5	139	7	fca3	7	20	4.911			1
19703	(244, 193, 76)	244	193	76	(243, 192, 71)	243	192	71			4.519	5.181	0.44	223	7	fca3	8	0	5.08945			1
24490	(240, 219, 76)	240	219	76	(239, 220, 71)	239	220	71			5.501	5.263	0.501	125	7	fca3	8	1	5.71704			1
27886	(235, 245, 76)	235	245	76	(239, 245, 71)	239	245	71			5.949	5.357	0.497	260	7	fca3	8	2	6.61282			1
34090	(236, 276, 73)	236	276	73	(239, 276, 70)	239	276	70			6.421	5.343	0.682	199	7	fca3	8	3	4.07196		on	1
35544	(238, 306, 71)	238	306	71	(237, 307, 69)	237	307	69			5.005	5.026	0.816	253	7	fca3	8	4	1.10758		might be on but looks off, value too high	1
48365	(226, 337, 72)	226	337	72	(236, 336, 68)	236	336	68			5.088	4.988	0.793	102	7	fca3	8	5	1.42814		might be on but looks off, value too high	1
43348	(253, 368, 70)	253	368	70	(238, 368, 68)	238	368	68			4.914	4.994	0.865	142	7	fca3	8	6	0.686925			1
48028	(240, 399, 68)	240	399	68	(235, 399, 68)	235	399	68			5.248	5.008	0.952	62	7	fca3	8	7	0.504605		on	1
45807	(234, 430, 67)	234	430	67	(234, 429, 66)	234	429	66			5.699	5.103	0.991	43	7	fca3	8	8	0.647757		on	1
44666	(232, 458, 70)	232	458	70	(232, 457, 66)	232	457	66			5.722	5.113	0.849	50	7	fca3	8	9	1.62669		on	1
48980	(235, 486, 69)	235	486	69	(234, 485, 66)	234	485	66			5.85	5.152	0.872	97	7	fca3	8	10	1.55672		on	1
45588	(231, 516, 68)	231	516	68	(231, 515, 67)	231	515	67			5.639	5.035	0.91	74	7	fca3	8	11	1.1617		on	1
63310	(232, 547, 67)	232	547	67	(236, 546, 64)	236	546	64			5.761	5.056	1	24	7	fca3	8	12	0.705		on	1
58315	(230, 580, 65)	230	580	65	(235, 578, 65)	235	578	65			6.364	5.11	0.993	29	7	fca3	8	13	1.29886		on	1
54034	(237, 611, 68)	237	611	68	(237, 609, 66)	237	609	66			5.493	5	0.977	37	7	fca3	8	14	0.622313		on	1
97960	(233, 655, 69)	233	655	69	(237, 653, 64)	237	653	64			5.855	4.922	0.903	35	7	fca3	8	15	1.56194		on	1
108589	(237, 699, 65)	237	699	65	(237, 700, 63)	237	700	63			5.884	4.935	1	13	7	fca3	8	16	0.949		on	1
105360	(236, 746, 62)	236	746	62	(237, 749, 63)	237	749	63			5.2	4.878	0.993	17	7	fca3	8	17	0.358657		off	1
122143	(243, 796, 60)	243	796	60	(244, 800, 62)	244	800	62			7.277	5.002	0.907	39	7	fca3	8	18	3.02115		on	1
124013	(244, 843, 64)	244	843	64	(245, 854, 61)	245	854	61			5.039	4.809	0.99	14	7	fca3	8	19	0.280899		off	1
108127	(251, 896, 61)	251	896	61	(248, 903, 64)	248	903	64			6.926	4.967	0.948	22	7	fca3	8	20	2.33891		on	1
196715	(253, 977, 70)	253	977	70	(256, 967, 64)	256	967	64			8.928	5.051	0.846	15	7	fca3	8	21	5.50219		on	1
11994	(302, 192, 76)	302	192	76	(301, 192, 73)	301	192	73			3.754	5.102	0.258	570	7	fca3	9	0	9.44839			1
15706	(298, 215, 76)	298	215	76	(296, 215, 72)	296	215	72			4.651	5.251	0.381	234	7	fca3	9	1	6.95635			1
17916	(300, 241, 76)	300	241	76	(294, 240, 72)	294	240	72			4.342	5.054	0.396	280	7	fca3	9	2	5.91065			1
15718	(293, 264, 76)	293	264	76	(293, 264, 71)	293	264	71			4.335	5.313	0.388	335	7	fca3	9	3	5.85968			1
22170	(298, 289, 76)	298	289	76	(294, 289, 72)	294	289	72			5.108	5.197	0.44	267	7	fca3	9	4	6.41209			1
22802	(307, 316, 76)	307	316	76	(299, 316, 72)	299	316	72			4.934	5.173	0.458	330	7	fca3	9	5	5.59993			1
22257	(305, 343, 76)	305	343	76	(298, 342, 71)	298	342	71			4.768	5.118	0.511	155	7	fca3	9	6	4.21272			1
21751	(292, 365, 76)	292	365	76	(298, 365, 71)	298	365	71			4.495	5.073	0.465	262	7	fca3	9	7	4.59367			1
30271	(297, 392, 76)	297	392	76	(298, 392, 71)	298	392	71			5.297	5.167	0.503	222	7	fca3	9	8	5.36382			1
29535	(293, 420, 76)	293	420	76	(297, 420, 70)	297	420	70			5.12	5.032	0.521	93	7	fca3	9	9	4.79526			1
35648	(294, 449, 76)	294	449	76	(294, 448, 69)	294	448	69			5.747	5.16	0.51	121	7	fca3	9	10	6.10863			1
31917	(299, 476, 71)	299	476	71	(296, 476, 69)	296	476	69			5.318	5.063	0.83	81	7	fca3	9	11	1.34423		on	1
57477	(292, 520, 76)	292	520	76	(295, 515, 69)	295	515	69			6.157	5.099	0.516	79	7	fca3	9	12	6.83317			1
68805	(298, 571, 75)	298	571	75	(299, 567, 69)	299	567	69			6.755	5.154	0.557	120	7	fca3	9	13	6.97347		on	1
50588	(288, 622, 73)	288	622	73	(298, 619, 69)	298	619	69			4.782	4.92	0.724	105	7	fca3	9	14	1.68497		off	1
58087	(310, 652, 68)	310	652	68	(303, 655, 68)	303	655	68			4.713	4.819	0.977	27	7	fca3	9	15	0.00495087		off	1
112366	(313, 714, 67)	313	714	67	(306, 712, 68)	306	712	68			5.089	4.825	0.976	16	7	fca3	9	16	0.389139		on	1
129268	(315, 789, 66)	315	789	66	(306, 788, 67)	306	788	67			5.501	4.854	0.999	12	7	fca3	9	17	0.652507		on	1
111973	(319, 858, 66)	319	858	66	(313, 861, 68)	313	861	68			4.786	4.765	0.926	36	7	fca3	9	18	0.403467		might be on	1
132826	(326, 936, 70)	326	936	70	(320, 944, 69)	320	944	69			4.872	4.769	0.912	10	7	fca3	9	19	0.573105		might be on	1
37535	(332, 1008, 72)	332	1008	72	(324, 1001, 69)	324	1001	69			4.609	4.832	0.421	61	7	fca3	9	20	6.11574			1
18344	(247, 27, 45)	247	27	45	(253, 25, 46)	253	25	46			3.589	5.399	0.664	357	9	fca3	1	0	0.00612048		off	1
21314	(258, 50, 43)	258	50	43	(256, 51, 42)	256	51	42			4.432	5.472	0.798	234	9	fca3	1	1	0.0818847		off	1
21779	(256, 78, 38)	256	78	38	(254, 76, 40)	254	76	40			4.882	5.568	0.793	224	9	fca3	1	2	0.588368		on	1
12516	(273, 96, 42)	273	96	42	(272, 97, 41)	272	97	41			3.858	5.303	0.762	260	9	fca3	1	3	-0.240008		off	1
11916	(271, 119, 43)	271	119	43	(271, 120, 41)	271	120	41			3.579	5.356	0.695	295	9	fca3	1	4	-0.20636		off	1
26500	(244, 119, 35)	244	119	35	(243, 115, 36)	243	115	36			5.22	5.445	0.986	143	9	fca3	1	5	-0.150882		off	1
27363	(247, 162, 33)	247	162	33	(246, 160, 34)	246	160	34			5.167	5.421	0.984	119	9	fca3	1	6	-0.169984		off	1
28506	(274, 147, 44)	274	147	44	(274, 154, 41)	274	154	41			5.113	5.305	0.947	125	9	fca3	1	7	0.0941552		off	1
24890	(271, 197, 33)	271	197	33	(265, 195, 36)	265	195	36			4.738	5.459	0.837	239	9	fca3	1	8	0.201693			1
25915	(264, 216, 40)	264	216	40	(266, 218, 37)	266	218	37			4.636	5.447	0.838	230	9	fca3	1	9	0.0852196			1
24909	(267, 245, 37)	267	245	37	(266, 245, 36)	266	245	36			4.91	5.653	0.789	122	9	fca3	1	10	0.570067		on	1
24147	(270, 269, 37)	270	269	37	(267, 270, 36)	267	270	36			5.138	5.625	0.839	141	9	fca3	1	11	0.498957		on	1
26714	(275, 300, 30)	275	300	30	(268, 299, 33)	268	299	33			4.923	5.472	0.919	123	9	fca3	1	12	-0.11509			1
29672	(274, 323, 41)	274	323	41	(269, 325, 36)	269	325	36			5.011	5.494	0.876	208	9	fca3	1	13	0.22632			1
72202	(272, 368, 35)	272	368	35	(270, 373, 32)	270	373	32			5.81	5.506	1	25	9	fca3	1	14	0.304		on	1
33569	(286, 429, 31)	286	429	31	(286, 433, 31)	286	433	31			5.701	5.54	0.969	117	9	fca3	1	15	0.343385		on	1
32886	(254, 439, 33)	254	439	33	(253, 436, 33)	253	436	33			6.308	5.807	0.942	167	9	fca3	1	16	0.889391		on	1
41812	(254, 504, 34)	254	504	34	(254, 494, 33)	254	494	33			5.43	5.48	0.983	83	9	fca3	1	17	0.0439064			1
26179	(287, 485, 31)	287	485	31	(287, 492, 31)	287	492	31			5.694	5.76	0.868	161	9	fca3	1	18	0.799908		on	1
91545	(265, 565, 34)	265	565	34	(267, 567, 32)	267	567	32			6.665	5.634	0.972	46	9	fca3	1	19	1.223		on	1
89127	(264, 648, 33)	264	648	33	(267, 651, 32)	267	651	32			6.033	5.562	1	2002	9	fca3	1	20	0.471		on	1
97288	(271, 727, 31)	271	727	31	(270, 739, 30)	270	739	30			7.078	5.582	1	2001	9	fca3	1	21	1.496		on	1
104634	(266, 811, 34)	266	811	34	(270, 830, 29)	270	830	29			7.314	5.428	0.949	23	9	fca3	1	22	2.27906		on	1
175503	(277, 959, 31)	277	959	31	(269, 948, 27)	269	948	27			5.006	4.906	0.999	14	9	fca3	1	23	0.105011		off	1
6677	(253, 1008, 40)	253	1008	40	(250, 1008, 40)	250	1008	40			1.173		0.001	677	9	fca3	1	24	1173			1
15839	(310, 26, 54)	310	26	54	(302, 28, 51)	302	28	51			3.977	5.385	0.698	333	9	fca3	2	0	0.312708		off	1
30878	(302, 66, 43)	302	66	43	(304, 60, 47)	304	60	47			5.335	5.424	0.996	108	9	fca3	2	1	-0.0675743		off	1
20425	(311, 96, 46)	311	96	46	(308, 97, 47)	308	97	47			4.657	5.369	0.881	185	9	fca3	2	2	-0.0829614		off	1
23301	(305, 125, 44)	305	125	44	(309, 122, 46)	309	122	46			4.587	5.321	0.877	146	9	fca3	2	3	-0.0906693		off	1
17687	(322, 151, 43)	322	151	43	(313, 150, 44)	313	150	44			4.148	5.382	0.77	226	9	fca3	2	4	0.00501299		off	1
18170	(311, 175, 43)	311	175	43	(314, 174, 43)	314	174	43			4.409	5.375	0.797	320	9	fca3	2	5	0.156995		off	1
34204	(312, 223, 41)	312	223	41	(314, 213, 43)	314	213	43			5.339	5.431	0.948	151	9	fca3	2	6	0.200857		off	1
41106	(315, 262, 40)	315	262	40	(316, 266, 43)	316	266	43			5.447	5.417	0.946	228	9	fca3	2	7	0.340928		off	1
58432	(322, 337, 40)	322	337	40	(316, 329, 43)	316	329	43			5.243	5.289	0.999	45	9	fca3	2	8	-0.0407518		off	1
52129	(318, 411, 39)	318	411	39	(318, 400, 41)	318	400	41			5.376	5.444	0.979	55	9	fca3	2	9	0.0473177		off	1
50836	(315, 458, 42)	315	458	42	(317, 475, 41)	317	475	41			5.242	5.341	0.994	128	9	fca3	2	10	-0.0673581		off	1
58902	(311, 541, 36)	311	541	36	(314, 547, 39)	314	547	39			5.261	5.252	0.927	99	9	fca3	2	11	0.423297		off	1
74804	(308, 613, 39)	308	613	39	(312, 626, 39)	312	626	39			5.306	5.2	0.997	39	9	fca3	2	12	0.121966		off	1
82753	(307, 699, 40)	307	699	40	(315, 718, 36)	315	718	36			5.202	5.047	0.965	29	9	fca3	2	13	0.343674		off	1
213096	(310, 858, 40)	310	858	40	(317, 881, 36)	317	881	36			5.27	4.912	0.948	20	9	fca3	2	14	0.647072		off	1
15422	(317, 1008, 38)	317	1008	38	(316, 1003, 38)	316	1003	38			4.505	5.376	0.403	319	9	fca3	2	15	5.80266			1
14496	(209, 32, 42)	209	32	42	(208, 32, 41)	208	32	41			4.956	5.539	0.917	240	9	fca3	3	0	-0.13442		off	1
12916	(211, 59, 41)	211	59	41	(209, 59, 41)	209	59	41			4.533	5.664	0.805	266	9	fca3	3	1	-0.0329441		off	1
17456	(209, 89, 39)	209	89	39	(208, 89, 39)	208	89	39			5.8	5.745	0.947	189	9	fca3	3	2	0.379604		on	1
14175	(210, 123, 36)	210	123	36	(210, 123, 35)	210	123	35			5.5	5.615	0.934	246	9	fca3	3	3	0.273651		on	1
36215	(212, 175, 34)	212	175	34	(213, 176, 34)	213	176	34			6.102	5.598	0.968	137	9	fca3	3	4	0.705719		on	1
29871	(221, 229, 29)	221	229	29	(217, 226, 31)	217	226	31			5.466	5.564	0.999	107	9	fca3	3	5	-0.0925285		off	1
37132	(226, 279, 27)	226	279	27	(220, 273, 29)	220	273	29			5.553	5.512	0.993	80	9	fca3	3	6	0.080145		off	1
39708	(221, 331, 25)	221	331	25	(220, 322, 28)	220	322	28			5.393	5.485	0.994	84	9	fca3	3	7	-0.0594467		off	1
46529	(221, 378, 30)	221	378	30	(220, 378, 27)	220	378	27			6.094	5.526	0.928	160	9	fca3	3	8	1.04081		on	1
40840	(220, 435, 25)	220	435	25	(220, 435, 25)	220	435	25			5.963	5.621	0.992	77	9	fca3	3	9	0.390089		on	1
50784	(224, 500, 21)	224	500	21	(218, 495, 25)	218	495	25			5.398	5.406	0.979	90	9	fca3	3	10	0.10779		off	1
63755	(218, 548, 30)	218	548	30	(221, 563, 24)	221	563	24			5.616	5.411	0.93	86	9	fca3	3	11	0.62771		on	1
153636	(221, 649, 29)	221	649	29	(225, 689, 21)	225	689	21			5.378	5.114	0.924	15	9	fca3	3	12	0.706346		might be off	1
152205	(217, 834, 22)	217	834	22	(227, 857, 19)	227	857	19			5.036	4.969	0.996	33	9	fca3	3	13	0.0872249		off	1
64810	(216, 1008, 28)	216	1008	28	(219, 980, 20)	219	980	20			4.72	4.856	0.484	47	9	fca3	3	14	4.89607			1
7809	(171, 14, 51)	171	14	51	(168, 13, 51)	168	13	51			2.61	5.3	0.491	427	9	fca3	4	0	0.0156823			1
27319	(165, 34, 55)	165	34	55	(165, 31, 57)	165	31	57			5.216	5.464	0.923	148	9	fca3	4	1	0.187138		might be on	1
20397	(180, 58, 55)	180	58	55	(170, 57, 56)	170	57	56			3.945	5.394	0.719	263	9	fca3	4	2	0.0927872			1
18439	(163, 73, 62)	163	73	62	(167, 77, 56)	167	77	56			3.831	5.394	0.727	211	9	fca3	4	3	-0.124399			1
19723	(167, 99, 55)	167	99	55	(167, 99, 55)	167	99	55			4.187	5.38	0.718	349	9	fca3	4	4	0.451476			1
22152	(174, 126, 47)	174	126	47	(170, 121, 53)	170	121	53			3.941	5.339	0.688	296	9	fca3	4	5	0.389198			1
17375	(163, 138, 60)	163	138	60	(168, 142, 53)	168	142	53			3.725	5.233	0.735	229	9	fca3	4	6	-0.164973			1
18835	(169, 160, 55)	169	160	55	(171, 161, 52)	171	161	52			3.625	5.202	0.681	341	9	fca3	4	7	0.121054			1
37602	(168, 190, 50)	168	190	50	(172, 188, 52)	172	188	52			5.237	5.324	0.925	182	9	fca3	4	8	0.337622			1
40304	(176, 228, 45)	176	228	45	(173, 223, 51)	173	223	51			5.424	5.316	0.959	154	9	fca3	4	9	0.339892			1
44545	(176, 265, 44)	176	265	44	(173, 262, 50)	173	262	50			5.575	5.392	0.998	74	9	fca3	4	10	0.194172			1
39980	(179, 307, 41)	179	307	41	(173, 302, 48)	173	302	48			5.298	5.264	0.998	97	9	fca3	4	11	0.0446172			1
42486	(178, 348, 40)	178	348	40	(171, 342, 46)	171	342	46			5.516	5.316	1	82	9	fca3	4	12	0.2		might be on	1
53528	(176, 392, 40)	176	392	40	(170, 388, 47)	170	388	47			5.69	5.398	0.957	79	9	fca3	4	13	0.547664		on	1
59917	(178, 453, 38)	178	453	38	(171, 440, 45)	171	440	45			5.403	5.397	0.999	73	9	fca3	4	14	0.0114084			1
64615	(175, 511, 38)	175	511	38	(167, 499, 45)	167	499	45			5.401	5.347	0.931	171	9	fca3	4	15	0.454289			1
66098	(166, 557, 41)	166	557	41	(169, 558, 44)	169	558	44			5.594	5.469	0.916	135	9	fca3	4	16	0.637987		on	1
68140	(176, 628, 36)	176	628	36	(171, 623, 41)	171	623	41			5.715	5.416	0.946	71	9	fca3	4	17	0.625226			1
77889	(175, 684, 41)	175	684	41	(173, 688, 41)	173	688	41			6.319	5.432	0.949	68	9	fca3	4	18	1.22659		on	1
94523	(178, 764, 39)	178	764	39	(172, 767, 39)	172	767	39			6.585	5.379	0.924	50	9	fca3	4	19	1.74762		on	1
104097	(174, 858, 36)	174	858	36	(171, 857, 40)	171	857	40			5.655	5.179	0.953	54	9	fca3	4	20	0.754893			1
140544	(171, 953, 39)	171	953	39	(166, 962, 37)	166	962	37			5.022	4.923	0.942	19	9	fca3	4	21	0.40821			1
22345	(129, 30, 63)	129	30	63	(129, 28, 65)	129	28	65			5.383	5.492	0.922	149	9	fca3	5	0	0.346395			1
27949	(124, 63, 65)	124	63	65	(124, 62, 66)	124	62	66			5.32	5.332	0.948	183	9	fca3	5	1	0.279814			1
19508	(130, 95, 65)	130	95	65	(129, 95, 64)	129	95	64			5.101	5.299	0.915	330	9	fca3	5	2	0.275863			1
60210	(130, 144, 62)	130	144	62	(126, 143, 64)	126	143	64			8.148	5.786	0.926	126	9	fca3	5	3	3.01314			1
22046	(128, 196, 60)	128	196	60	(127, 195, 61)	127	195	61			5.211	5.345	0.931	259	9	fca3	5	4	0.252207			1
21183	(131, 230, 57)	131	230	57	(130, 227, 60)	130	227	60			4.925	5.269	0.929	166	9	fca3	5	5	0.0323994			1
55435	(131, 276, 57)	131	276	57	(128, 281, 58)	128	281	58			5.622	5.302	0.926	113	9	fca3	5	6	0.769274			1
71647	(130, 363, 51)	130	363	51	(125, 365, 56)	125	365	56			5.49	5.237	0.998	30	9	fca3	5	7	0.264002			1
73689	(126, 446, 52)	126	446	52	(121, 454, 53)	121	454	53			5.664	5.376	0.968	49	9	fca3	5	8	0.47524			1
107245	(125, 560, 55)	125	560	55	(121, 562, 53)	121	562	53			5.875	5.29	0.905	53	9	fca3	5	9	1.20171			1
120887	(127, 670, 51)	127	670	51	(123, 699, 51)	123	699	51			5.737	5.192	0.945	111	9	fca3	5	10	0.878899			1
147134	(126, 872, 44)	126	872	44	(120, 872, 48)	120	872	48			5.044	4.959	0.967	78	9	fca3	5	11	0.257132			1
45521	(112, 986, 53)	112	986	53	(115, 991, 54)	115	991	54			4.717	4.865	0.993	87	9	fca3	5	12	-0.114748			1
32042	(111, 218, 76)	111	218	76	(109, 212, 72)	109	212	72			4.703	5.344	0.408	237	9	fca3	6	0	6.18296			1
42232	(108, 294, 76)	108	294	76	(107, 288, 72)	107	288	72			4.675	5.226	0.449	276	9	fca3	6	1	5.18603			1
45747	(106, 351, 76)	106	351	76	(100, 364, 72)	100	364	72			4.804	5.154	0.453	157	9	fca3	6	2	5.45086			1
60081	(91, 456, 76)	91	456	76	(93, 462, 72)	93	462	72			4.916	5.196	0.43	329	9	fca3	6	3	6.23656			1
70720	(94, 553, 76)	94	553	76	(91, 580, 71)	91	580	71			4.878	4.988	0.477	163	9	fca3	6	4	5.23842			1
87815	(88, 689, 75)	88	689	75	(91, 711, 70)	91	711	70			4.851	4.957	0.546	127	9	fca3	6	5	3.92762			1
126323	(91, 841, 73)	91	841	73	(86, 853, 70)	86	853	70			4.923	4.825	0.747	43	9	fca3	6	6	1.76536			1
40641	(87, 969, 76)	87	969	76	(88, 975, 72)	88	975	72			4.63	4.832	0.528	121	9	fca3	6	7	3.93694			1
20918	(329, 23, 72)	329	23	72	(325, 24, 69)	325	24	69			4.662	5.227	0.746	191	9	fca3	7	0	1.02233		off	1
18056	(339, 47, 76)	339	47	76	(328, 51, 67)	328	51	67			3.943	5.205	0.413	293	9	fca3	7	1	4.34222			1
20083	(324, 71, 72)	324	71	72	(330, 73, 66)	330	73	66			4.158	5.248	0.641	301	9	fca3	7	2	1.23874			1
25760	(343, 99, 68)	343	99	68	(334, 99, 67)	334	99	67			4.755	5.122	0.927	138	9	fca3	7	3	0.00744984			1
29732	(344, 129, 65)	344	129	65	(336, 128, 66)	336	128	66			4.741	5.068	0.934	118	9	fca3	7	4	0.00801713			1
23748	(331, 154, 68)	331	154	68	(337, 155, 65)	337	155	65			4.347	5.213	0.799	396	9	fca3	7	5	0.227551			1
26825	(326, 180, 64)	326	180	64	(333, 179, 64)	333	179	64			4.292	5.231	0.805	286	9	fca3	7	6	0.100677			1
26118	(322, 204, 68)	322	204	68	(333, 204, 65)	333	204	65			4.324	5.159	0.818	158	9	fca3	7	7	0.127064			1
25397	(350, 228, 66)	350	228	66	(340, 228, 65)	340	228	65			4.372	5.077	0.859	264	9	fca3	7	8	0.0126391			1
39926	(347, 257, 65)	347	257	65	(338, 258, 65)	338	258	65			5.056	5.109	0.947	176	9	fca3	7	9	0.229965			1
43724	(331, 293, 63)	331	293	63	(339, 290, 65)	339	290	65			4.983	5.071	0.987	101	9	fca3	7	10	-0.0223678			1
34573	(351, 320, 67)	351	320	67	(340, 321, 65)	340	321	65			4.999	5.046	0.976	203	9	fca3	7	11	0.0759262			1
38932	(349, 354, 65)	349	354	65	(339, 353, 65)	339	353	65			5.081	5.106	0.993	181	9	fca3	7	12	0.0108177			1
39779	(346, 389, 63)	346	389	63	(336, 388, 64)	336	388	64			5.199	5.156	0.994	192	9	fca3	7	13	0.0743823			1
39862	(344, 426, 63)	344	426	63	(335, 424, 64)	335	424	64			5.093	5.142	0.995	85	9	fca3	7	14	-0.023407			1
35503	(341, 460, 65)	341	460	65	(333, 459, 65)	333	459	65			5.038	5.1	0.974	217	9	fca3	7	15	0.0724846			1
35772	(340, 497, 63)	340	497	63	(332, 495, 64)	332	495	64			5.182	5.126	0.947	162	9	fca3	7	16	0.346017			1
92726	(340, 571, 61)	340	571	61	(331, 556, 64)	331	556	64			5.223	5.104	0.975	142	9	fca3	7	17	0.252923			1
102595	(338, 645, 60)	338	645	60	(330, 640, 64)	330	640	64			5.104	5.064	0.999	32	9	fca3	7	18	0.0451091			1
133053	(326, 735, 62)	326	735	62	(336, 740, 61)	336	740	61			4.894	4.901	0.927	199	9	fca3	7	19	0.378396			1
154739	(326, 842, 73)	326	842	73	(337, 851, 62)	337	851	62			4.85	4.788	0.658	57	9	fca3	7	20	2.58282			1
104921	(338, 984, 63)	338	984	63	(329, 965, 64)	329	965	64			4.996	4.844	0.947	109	9	fca3	7	21	0.431607			1
12496	(161, 97, 76)	161	97	76	(158, 99, 74)	158	99	74			2.976	5.117	0.179	401	9	fca3	8	0	11.5087			1
9081	(156, 120, 76)	156	120	76	(158, 122, 73)	158	122	73			3.028	5.213	0.246	480	9	fca3	8	1	7.09594			1
11744	(158, 140, 76)	158	140	76	(158, 142, 73)	158	142	73			3.232	5.241	0.257	363	9	fca3	8	2	7.33488			1
13467	(155, 163, 76)	155	163	76	(154, 165, 72)	154	165	72			3.475	5.111	0.324	322	9	fca3	8	3	5.61431			1
14054	(156, 185, 76)	156	185	76	(156, 186, 73)	156	186	73			3.9	5.116	0.333	530	9	fca3	8	4	6.59571			1
11246	(153, 204, 76)	153	204	76	(155, 206, 73)	155	206	73			3.363	5.218	0.272	393	9	fca3	8	5	7.14597			1
10055	(154, 224, 76)	154	224	76	(154, 227, 72)	154	227	72			3.268	5.11	0.282	415	9	fca3	8	6	6.47865			1
23293	(151, 250, 76)	151	250	76	(154, 252, 72)	154	252	72			4.855	5.096	0.464	328	9	fca3	8	7	5.36736			1
25744	(155, 281, 76)	155	281	76	(157, 282, 71)	157	282	71			4.888	5.041	0.522	173	9	fca3	8	8	4.32298			1
21714	(151, 311, 76)	151	311	76	(150, 313, 71)	150	313	71			4.491	4.983	0.505	205	9	fca3	8	9	3.91007			1
28523	(151, 341, 75)	151	341	75	(155, 341, 71)	155	341	71			4.647	4.961	0.599	165	9	fca3	8	10	2.79693		off	1
29715	(150, 373, 76)	150	373	76	(151, 376, 71)	151	376	71			4.763	4.953	0.533	172	9	fca3	8	11	3.98321			1
32168	(139, 406, 76)	139	406	76	(146, 407, 71)	146	407	71			4.894	5.054	0.533	144	9	fca3	8	12	4.12799			1
61350	(140, 449, 76)	140	449	76	(145, 453, 70)	145	453	70			5.296	5.041	0.536	56	9	fca3	8	13	4.8396			1
72378	(138, 515, 76)	138	515	76	(145, 519, 71)	145	519	71			5.104	4.95	0.507	64	9	fca3	8	14	5.11706			1
94485	(142, 587, 76)	142	587	76	(148, 593, 69)	148	593	69			5.638	4.966	0.499	95	9	fca3	8	15	6.3326			1
118358	(144, 680, 72)	144	680	72	(147, 678, 68)	147	678	68			4.896	4.839	0.773	34	9	fca3	8	16	1.49476			1
121576	(143, 766, 75)	143	766	75	(143, 765, 68)	143	765	68			6.156	4.929	0.588	37	9	fca3	8	17	5.54039			1
243361	(149, 959, 67)	149	959	67	(143, 896, 67)	143	896	67			4.601	4.627	0.994	12	9	fca3	8	18	0.00177264			1
59330	(158, 1008, 74)	158	1008	74	(144, 993, 70)	144	993	70			4.575	4.711	0.321	188	9	fca3	8	19	9.54134			1
54197	(217, 241, 58)	217	241	58	(214, 237, 60)	214	237	60			6.133	5.243	0.993	2005	9	fca3	9	0	0.933234			1
46211	(217, 275, 57)	217	275	57	(217, 274, 59)	217	274	59			6.728	5.295	0.998	76	9	fca3	9	1	1.44648			1
83908	(214, 324, 55)	214	324	55	(215, 318, 58)	215	318	58			6.3	5.175	0.979	72	9	fca3	9	2	1.26014			1
74163	(213, 371, 57)	213	371	57	(214, 367, 58)	214	367	58			6.167	5.134	0.934	75	9	fca3	9	3	1.46878			1
44623	(210, 411, 54)	210	411	54	(207, 409, 57)	207	409	57			5.109	5.032	0.986	93	9	fca3	9	4	0.149542			1
62880	(213, 450, 56)	213	450	56	(209, 446, 58)	209	446	58			5.94	5.14	0.958	92	9	fca3	9	5	1.06042			1
56317	(213, 498, 52)	213	498	52	(208, 492, 55)	208	492	55			5.003	5.004	0.942	100	9	fca3	9	6	0.30704			1
65704	(211, 548, 52)	211	548	52	(213, 539, 55)	213	539	55			5.126	4.977	0.997	58	9	fca3	9	7	0.164424			1
78603	(215, 597, 49)	215	597	49	(211, 591, 53)	211	591	53			5.097	4.993	1	42	9	fca3	9	8	0.104			1
77064	(211, 650, 51)	211	650	51	(210, 649, 53)	210	649	53			5.309	4.989	1	40	9	fca3	9	9	0.32			1
99666	(209, 719, 53)	209	719	53	(209, 717, 53)	209	717	53			5.895	5.017	0.996	28	9	fca3	9	10	0.901675			1
108559	(212, 789, 47)	212	789	47	(209, 786, 53)	209	786	53			5.036	4.853	0.999	17	9	fca3	9	11	0.188041			1
137758	(214, 865, 47)	214	865	47	(213, 862, 52)	213	862	52			6.816	4.821	0.992	13	9	fca3	9	12	2.04997			1
186521	(205, 941, 58)	205	941	58	(206, 954, 52)	206	954	52			4.785	4.695	0.982	2007	9	fca3	9	13	0.177709			1
37328	(219, 1008, 76)	219	1008	76	(209, 1004, 70)	209	1004	70			4.435	4.954	0.213	375	9	fca3	9	14	15.8676			1
47427	(282, 207, 67)	282	207	67	(276, 207, 65)	276	207	65			5.939	5.229	0.912	273	9	fca3	10	0	1.28306			1
41829	(288, 237, 66)	288	237	66	(282, 237, 65)	282	237	65			6.117	5.288	0.993	106	9	fca3	10	1	0.872121			1
56605	(287, 271, 63)	287	271	63	(280, 271, 63)	280	271	63			5.228	5.042	0.998	65	9	fca3	10	2	0.196477			1
42750	(280, 305, 64)	280	305	64	(281, 304, 63)	281	304	63			5.656	5.107	0.998	91	9	fca3	10	3	0.560335			1
44135	(288, 339, 64)	288	339	64	(282, 338, 63)	282	338	63			5.325	5.129	0.954	175	9	fca3	10	4	0.452761			1
50767	(281, 368, 65)	281	368	65	(278, 368, 64)	278	368	64			5.654	5.096	0.985	70	9	fca3	10	5	0.644102			1
79722	(281, 414, 63)	281	414	63	(281, 416, 61)	281	416	61			6.587	5.172	1	27	9	fca3	10	6	1.415			1
76316	(279, 465, 61)	279	465	61	(278, 467, 62)	278	467	62			6.599	5.115	0.933	52	9	fca3	10	7	1.95788			1
101192	(278, 522, 61)	278	522	61	(277, 518, 62)	277	518	62			7.478	5.226	1	16	9	fca3	10	8	2.252			1
87181	(279, 573, 66)	279	573	66	(278, 578, 62)	278	578	62			6.295	5.16	1	22	9	fca3	10	9	1.135			1
84056	(277, 636, 63)	277	636	63	(276, 637, 61)	276	637	61			5.938	5.015	1	24	9	fca3	10	10	0.923			1
104057	(273, 695, 65)	273	695	65	(277, 699, 61)	277	699	61			7.542	5.039	0.928	89	9	fca3	10	11	3.08816			1
89689	(274, 762, 62)	274	762	62	(280, 768, 60)	280	768	60			6.466	4.969	0.938	62	9	fca3	10	12	1.92439			1
142244	(287, 858, 56)	287	858	56	(280, 844, 61)	280	844	61			6.881	4.73	0.992	9	9	fca3	10	13	2.20649			1
240611	(275, 963, 73)	275	963	73	(272, 952, 62)	272	952	62			7.071	4.814	0.712	10	9	fca3	10	14	5.11718			1
22251	(180, 589, 77)	180	589	77	(181, 581, 75)	181	581	75			3.077	4.927	0.16	2001	10	fca3	1	0	14.3042			1
22589	(168, 642, 77)	168	642	77	(169, 636, 76)	169	636	76			2.43	5.142	0.068	331	10	fca3	1	1	30.5933			1
37159	(164, 725, 77)	164	725	77	(165, 715, 75)	165	715	75			3.76	4.989	0.291	207	10	fca3	1	2	7.93196			1
44957	(155, 817, 77)	155	817	77	(160, 797, 75)	160	797	75			3.692	4.878	0.3	171	10	fca3	1	3	7.42867			1
70578	(150, 892, 76)	150	892	76	(152, 889, 72)	152	889	72			4.816	4.807	0.588	115	10	fca3	1	4	3.38348	epidermis	off	1
84654	(138, 981, 74)	138	981	74	(143, 972, 71)	143	972	71			4.638	4.676	0.695	100	10	fca3	1	5	1.99738	epidermis	off	1
7358	(187, 205, 77)	187	205	77	(186, 207, 76)	186	207	76			2.558	11	0.08	495	10	fca3	2	0	20.975			1
12770	(187, 233, 77)	187	233	77	(185, 233, 74)	185	233	74			3.849	5.279	0.252	474	10	fca3	2	1	9.99481			1
20699	(194, 268, 77)	194	268	77	(188, 275, 74)	188	275	74			4.139	5.376	0.265	347	10	fca3	2	2	10.2429			1
21896	(187, 326, 77)	187	326	77	(185, 329, 73)	185	329	73			4.809	5.276	0.363	297	10	fca3	2	3	7.97193			1
31464	(197, 373, 77)	197	373	77	(191, 375, 72)	191	375	72			5.662	5.301	0.494	185	10	fca3	2	4	6.16054			1
44809	(197, 427, 76)	197	427	76	(192, 428, 71)	192	428	71			5.869	5.249	0.56	226	10	fca3	2	5	5.23136	epidermis	on	1
51260	(191, 481, 75)	191	481	75	(191, 482, 70)	191	482	70			5.62	5.192	0.676	81	10	fca3	2	6	3.12161	epidermis	on	1
75712	(178, 552, 66)	178	552	66	(185, 554, 67)	185	554	67			4.943	5.014	0.994	2003	10	fca3	2	7	-0.041163	epidermis	off	1
97305	(180, 663, 65)	180	663	65	(178, 665, 64)	178	665	64			5.261	4.964	0.944	99	10	fca3	2	8	0.609093	epidermis	might be on	1
133314	(178, 787, 65)	178	787	65	(168, 805, 60)	168	805	60			5.094	4.856	0.885	50	10	fca3	2	9	0.899932	epidermis	might be on	1
98404	(148, 993, 53)	148	993	53	(151, 950, 52)	151	950	52			4.736	4.755	0.91	85	10	fca3	2	10	0.449396	epidermis	off	1
17626	(210, 238, 68)	210	238	68	(210, 238, 68)	210	238	68			5.01	5.531	0.922	257	10	fca3	3	0	-0.0971605	epidermis	off	1
16408	(211, 267, 67)	211	267	67	(211, 266, 67)	211	266	67			4.779	5.441	0.878	263	10	fca3	3	1	0.00205239	epidermis	off	1
49716	(218, 320, 77)	218	320	77	(210, 310, 67)	210	310	67			5.285	5.162	0.509	119	10	fca3	3	2	5.2211			1
33352	(213, 374, 61)	213	374	61	(213, 365, 64)	213	365	64			5.082	5.263	0.943	256	10	fca3	3	3	0.126183	epidermis	off	1
36339	(211, 418, 58)	211	418	58	(214, 416, 62)	214	416	62			5.1	5.249	0.973	113	10	fca3	3	4	-0.00747893	epidermis	off	1
24837	(207, 478, 54)	207	478	54	(212, 470, 59)	212	470	59			4.779	5.224	0.903	330	10	fca3	3	5	0.0683588	epidermis	off	1
32541	(207, 515, 53)	207	515	53	(209, 525, 54)	209	525	54			4.816	5.113	0.969	146	10	fca3	3	6	-0.142928	epidermis	off	1
77212	(207, 646, 54)	207	646	54	(203, 615, 50)	203	615	50			5.28	5.187	0.94	134	10	fca3	3	7	0.430021	epidermis	off	1
81412	(200, 715, 51)	200	715	51	(195, 746, 47)	195	746	47			5.16	5	0.893	169	10	fca3	3	8	0.778275	epidermis	off	1
113249	(191, 842, 46)	191	842	46	(181, 891, 39)	181	891	39			5.083	4.856	0.91	91	10	fca3	3	9	0.729714	epidermis	off	1
30993	(171, 985, 37)	171	985	37	(170, 989, 36)	170	989	36			4.515	4.739	0.919	183	10	fca3	3	10	0.173949	epidermis	off	1
15261	(231, 30, 75)	231	30	75	(233, 32, 70)	233	32	70			4.469	5.273	0.595	279	10	fca3	4	0	2.23792	epidermis	off	1
17675	(231, 55, 73)	231	55	73	(233, 55, 70)	233	55	70			4.911	5.298	0.74	252	10	fca3	4	1	1.33849	epidermis	off	1
21656	(235, 79, 77)	235	79	77	(235, 80, 69)	235	80	69			4.355	5.162	0.45	205	10	fca3	4	2	4.51578			1
21633	(240, 101, 74)	240	101	74	(237, 102, 68)	237	102	68			4.559	5.282	0.671	215	10	fca3	4	3	1.51234	epidermis	off	1
23419	(238, 127, 66)	238	127	66	(241, 126, 68)	241	126	68			4.604	5.189	0.863	286	10	fca3	4	4	0.145878	epidermis	off	1
19613	(238, 151, 66)	238	151	66	(242, 149, 67)	242	149	67			4.213	5.134	0.84	223	10	fca3	4	5	-0.118524	epidermis	off	1
16623	(244, 173, 66)	244	173	66	(242, 173, 66)	242	173	66			4.128	5.31	0.781	249	10	fca3	4	6	-0.0244686	epidermis	off	1
24881	(251, 193, 74)	251	193	74	(246, 194, 66)	246	194	66			5.17	5.492	0.675	174	10	fca3	4	7	2.16726	epidermis	on	1
31221	(241, 220, 63)	241	220	63	(246, 220, 65)	246	220	65			5.05	5.277	0.969	141	10	fca3	4	8	-0.0654417	epidermis	off	1
24248	(247, 247, 67)	247	247	67	(245, 247, 64)	245	247	64			4.841	5.287	0.934	186	10	fca3	4	9	-0.103916	epidermis	off	1
37609	(246, 277, 61)	246	277	61	(248, 277, 64)	248	277	64			5.763	5.361	0.989	111	10	fca3	4	10	0.466098	epidermis	on	1
29138	(249, 305, 65)	249	305	65	(247, 305, 63)	247	305	63			5.3	5.406	0.975	151	10	fca3	4	11	0.0298974	epidermis	off	1
26511	(245, 333, 66)	245	333	66	(246, 334, 62)	246	334	62			5.26	5.425	0.922	197	10	fca3	4	12	0.279989	epidermis	off	1
24312	(245, 360, 63)	245	360	63	(248, 360, 62)	248	360	62			4.965	5.302	0.897	267	10	fca3	4	13	0.233117	epidermis	off	1
35788	(254, 395, 67)	254	395	67	(249, 394, 61)	249	394	61			4.932	5.09	0.978	122	10	fca3	4	14	-0.0470552	epidermis	off	1
31094	(242, 431, 51)	242	431	51	(248, 429, 58)	248	429	58			4.984	5.128	0.99	153	10	fca3	4	15	-0.0936566	epidermis	off	1
30372	(240, 463, 49)	240	463	49	(246, 462, 55)	246	462	55			4.983	5.117	0.988	154	10	fca3	4	16	-0.0734777	epidermis	off	1
33603	(242, 495, 46)	242	495	46	(245, 493, 54)	245	493	54			5.102	5.213	0.99	124	10	fca3	4	17	-0.0594646	epidermis	off	1
36688	(238, 528, 44)	238	528	44	(244, 528, 51)	244	528	51			5.023	5.133	0.997	121	10	fca3	4	18	-0.0948857	epidermis	off	1
37698	(235, 566, 42)	235	566	42	(243, 565, 48)	243	565	48			5.166	5.194	0.996	118	10	fca3	4	19	-0.00725301	epidermis	off	1
42063	(232, 609, 38)	232	609	38	(240, 605, 45)	240	605	45			5.019	5.069	0.999	97	10	fca3	4	20	-0.044976	epidermis	off	1
37842	(233, 645, 37)	233	645	37	(241, 643, 43)	241	643	43			5.169	5.154	0.959	208	10	fca3	4	21	0.23599	epidermis	off	1
48806	(235, 683, 47)	235	683	47	(236, 686, 42)	236	686	42			5.435	5.202	1	76	10	fca3	4	22	0.233	epidermis	off	1
55072	(241, 730, 41)	241	730	41	(234, 730, 41)	234	730	41			5.519	5.162	0.995	79	10	fca3	4	23	0.384734	epidermis	off	1
48824	(241, 773, 44)	241	773	44	(230, 775, 40)	230	775	40			4.987	5.02	0.954	95	10	fca3	4	24	0.207463	epidermis	off	1
54469	(235, 828, 42)	235	828	42	(227, 818, 38)	227	818	38			4.943	4.959	0.942	84	10	fca3	4	25	0.288346	epidermis	off	1
111508	(232, 879, 37)	232	879	37	(220, 895, 33)	220	895	33			4.882	4.886	0.977	66	10	fca3	4	26	0.110929	epidermis	off	1
89850	(210, 1008, 30)	210	1008	30	(208, 978, 29)	208	978	29			6.023	4.838	0.525	34	10	fca3	4	27	6.63438			1
10534	(266, 52, 66)	266	52	66	(265, 51, 66)	265	51	66			3.93	5.232	0.771	324	10	fca3	5	0	-0.134724	epidermis	off	1
16270	(267, 74, 66)	267	74	66	(266, 73, 66)	266	73	66			4.235	5.156	0.84	272	10	fca3	5	1	-0.114333	epidermis	off	1
20339	(270, 103, 64)	270	103	64	(270, 104, 63)	270	104	63			5.081	5.229	0.975	227	10	fca3	5	2	-0.0177179	epidermis	off	1
24244	(274, 146, 59)	274	146	59	(273, 146, 61)	273	146	61			5.233	5.335	0.935	269	10	fca3	5	3	0.261791	epidermis	off	1
23530	(273, 189, 57)	273	189	57	(273, 190, 58)	273	190	58			5.085	5.381	0.947	258	10	fca3	5	4	-0.0114118	epidermis	off	1
22970	(280, 235, 56)	280	235	56	(279, 234, 58)	279	234	58			6.555	5.723	0.999	175	10	fca3	5	5	0.838562	epidermis	on	1
18535	(282, 267, 55)	282	267	55	(280, 266, 57)	280	266	57			5.473	5.506	0.96	240	10	fca3	5	6	0.195042	epidermis	off	1
30609	(279, 310, 52)	279	310	52	(278, 313, 52)	278	313	52			6.567	5.571	0.947	247	10	fca3	5	7	1.36353	epidermis	on	1
38842	(280, 371, 52)	280	371	52	(278, 375, 50)	278	375	50			6.879	5.511	0.98	116	10	fca3	5	8	1.50839	epidermis	on	1
40424	(284, 431, 48)	284	431	48	(281, 433, 47)	281	433	47			5.688	5.282	0.96	202	10	fca3	5	9	0.643	epidermis	off	1
51508	(284, 500, 47)	284	500	47	(281, 496, 43)	281	496	43			5.694	5.309	0.998	68	10	fca3	5	10	0.396411	epidermis	off	1
47892	(283, 556, 43)	283	556	43	(281, 557, 39)	281	557	39			7.624	5.519	0.962	101	10	fca3	5	11	2.40616	epidermis	on	1
51728	(280, 619, 41)	280	619	41	(278, 620, 36)	278	620	36			7.548	5.355	0.953	90	10	fca3	5	12	2.56525	epidermis	on	1
54853	(279, 684, 37)	279	684	37	(275, 686, 33)	275	686	33			7.97	5.371	0.93	77	10	fca3	5	13	3.19889	epidermis	on	1
107716	(271, 790, 33)	271	790	33	(265, 802, 29)	265	802	29			7.017	5.093	0.972	69	10	fca3	5	14	2.12614	epidermis	on	1
112513	(255, 945, 27)	255	945	27	(251, 945, 22)	251	945	22			6.115	4.891	0.918	125	10	fca3	5	15	1.77022	epidermis	on	1
15428	(295, 33, 71)	295	33	71	(295, 33, 69)	295	33	69			3.818	5.232	0.681	281	10	fca3	6	0	0.374461	epidermis	off	1
17187	(300, 55, 73)	300	55	73	(299, 55, 68)	299	55	68			4.546	5.296	0.699	264	10	fca3	6	1	1.20758	epidermis	off	1
14673	(301, 80, 67)	301	80	67	(303, 79, 67)	303	79	67			4.223	5.382	0.788	289	10	fca3	6	2	-0.0228629	epidermis	off	1
15054	(304, 101, 67)	304	101	67	(304, 100, 67)	304	100	67			4.06	5.369	0.766	283	10	fca3	6	3	-0.0687389	epidermis	off	1
16154	(309, 119, 69)	309	119	69	(306, 119, 66)	306	119	66			4.113	5.342	0.764	273	10	fca3	6	4	0.0415079	epidermis	off	1
19381	(314, 140, 72)	314	140	72	(310, 141, 66)	310	141	66			4.492	5.465	0.707	225	10	fca3	6	5	0.888607	epidermis	off	1
13862	(308, 161, 66)	308	161	66	(307, 161, 65)	307	161	65			4.1	5.381	0.769	296	10	fca3	6	6	-0.0494005	epidermis	off	1
19345	(307, 183, 66)	307	183	66	(309, 182, 65)	309	182	65			4.196	5.312	0.801	219	10	fca3	6	7	-0.0735481	epidermis	off	1
21772	(306, 204, 64)	306	204	64	(309, 203, 64)	309	203	64			4.359	5.349	0.831	209	10	fca3	6	8	-0.103513	epidermis	off	1
26981	(318, 229, 61)	318	229	61	(318, 229, 64)	318	229	64			4.89	5.219	0.971	157	10	fca3	6	9	-0.182955	epidermis	off	1
24553	(313, 255, 66)	313	255	66	(316, 256, 64)	316	256	64			4.622	5.176	0.929	187	10	fca3	6	10	-0.200758	epidermis	off	1
23538	(321, 281, 66)	321	281	66	(317, 282, 62)	317	282	62			4.712	5.139	0.914	861	10	fca3	6	11	0.0163611	epidermis	off	1
28449	(324, 307, 68)	324	307	68	(317, 308, 61)	317	308	61			4.855	5.205	0.887	237	10	fca3	6	12	0.268506	epidermis	off	1
19567	(311, 339, 54)	311	339	54	(312, 337, 56)	312	337	56			5.161	5.306	0.967	253	10	fca3	6	13	0.0311251	epidermis	off	1
22548	(320, 366, 56)	320	366	56	(316, 365, 59)	316	365	59			4.804	5.169	0.925	210	10	fca3	6	14	0.0245135	epidermis	off	1
25484	(324, 391, 65)	324	391	65	(319, 392, 59)	319	392	59			4.714	5.157	0.902	547	10	fca3	6	15	0.0691641	epidermis	off	1
31088	(326, 419, 63)	326	419	63	(322, 419, 58)	322	419	58			4.901	5.08	0.993	136	10	fca3	6	16	-0.144451	epidermis	off	1
50325	(316, 475, 49)	316	475	49	(321, 463, 55)	321	463	55			5.025	5.098	0.972	224	10	fca3	6	17	0.0717531	epidermis	off	1
28474	(318, 510, 47)	318	510	47	(321, 509, 51)	321	509	51			5.075	5.171	0.998	188	10	fca3	6	18	-0.0858297	epidermis	off	1
24295	(320, 543, 46)	320	543	46	(321, 541, 50)	321	541	50			5.32	5.264	0.993	199	10	fca3	6	19	0.0935025	epidermis	off	1
58859	(317, 607, 42)	317	607	42	(319, 591, 48)	319	591	48			5.06	5.066	0.998	75	10	fca3	6	20	0.00414028	epidermis	off	1
67419	(315, 678, 40)	315	678	40	(318, 658, 45)	318	658	45			5.193	5.186	0.996	62	10	fca3	6	21	0.0278554	epidermis	off	1
70598	(319, 711, 48)	319	711	48	(313, 731, 43)	313	731	43			4.986	5.034	0.955	57	10	fca3	6	22	0.186942	epidermis	off	1
64482	(312, 792, 45)	312	792	45	(309, 796, 42)	309	796	42			5.476	5.142	0.942	137	10	fca3	6	23	0.671163	epidermis	off	1
71201	(297, 844, 40)	297	844	40	(302, 861, 38)	302	861	38			4.984	4.961	0.95	54	10	fca3	6	24	0.285316	epidermis	off	1
85173	(301, 938, 43)	301	938	43	(296, 941, 36)	296	941	36			4.979	4.843	0.936	94	10	fca3	6	25	0.476444	epidermis	off	1
34472	(293, 1003, 38)	293	1003	38	(289, 998, 35)	289	998	35			4.695	4.918	0.722	167	10	fca3	6	26	1.58477	epidermis	off	1
22272	(355, 287, 66)	355	287	66	(355, 283, 65)	355	283	65			5.315	5.4	0.982	2010	10	fca3	7	0	0.0124236	epidermis	off	1
34107	(353, 324, 62)	353	324	62	(355, 331, 64)	355	331	64			5.09	5.211	0.98	139	10	fca3	7	1	-0.0171224	epidermis	off	1
34683	(356, 383, 62)	356	383	62	(357, 385, 62)	357	385	62			7.411	5.66	0.991	133	10	fca3	7	2	1.8183	epidermis	on	1
42861	(358, 448, 58)	358	448	58	(360, 438, 61)	360	438	61			4.968	5.139	0.984	126	10	fca3	7	3	-0.0902195	epidermis	off	1
36976	(357, 485, 55)	357	485	55	(358, 490, 57)	358	490	57			5.578	5.217	0.996	123	10	fca3	7	4	0.383402	epidermis	off	1
42354	(356, 559, 51)	356	559	51	(359, 547, 53)	359	547	53			4.928	5.107	0.992	108	10	fca3	7	5	-0.139258	epidermis	off	1
37061	(357, 607, 49)	357	607	49	(359, 607, 50)	359	607	50			5.065	5.154	0.989	127	10	fca3	7	6	-0.0326653	epidermis	off	1
59349	(356, 677, 52)	356	677	52	(356, 681, 50)	356	681	50			5.902	5.193	0.999	60	10	fca3	7	7	0.714908	epidermis	on	1
54094	(353, 753, 51)	353	753	51	(353, 755, 47)	353	755	47			5.499	5.116	0.913	161	10	fca3	7	8	0.907001	epidermis	on	1
84481	(347, 839, 49)	347	839	49	(345, 849, 44)	345	849	44			5.905	5.106	0.949	46	10	fca3	7	9	1.11634	epidermis	on	1
86979	(333, 961, 45)	333	961	45	(334, 957, 41)	334	957	41			5.432	4.854	0.938	61	10	fca3	7	10	0.937045	epidermis	on	1
14582	(377, 165, 77)	377	165	77	(375, 165, 75)	375	165	75			3.648	5.191	0.246	280	10	fca3	8	0	9.63827			1
20061	(380, 213, 77)	380	213	77	(380, 207, 75)	380	207	75			4.052	5.427	0.28	346	10	fca3	8	1	9.04443			1
19614	(389, 258, 77)	389	258	77	(388, 255, 75)	388	255	75			3.912	5.544	0.31	230	10	fca3	8	2	7.07535			1
32114	(388, 303, 77)	388	303	77	(388, 304, 72)	388	304	72			5.576	5.34	0.498	292	10	fca3	8	3	5.85679			1
35341	(392, 346, 77)	392	346	77	(390, 355, 71)	390	355	71			5.19	5.157	0.525	166	10	fca3	8	4	4.72871			1
33573	(393, 406, 75)	393	406	75	(393, 408, 71)	393	408	71			5.638	5.288	0.629	172	10	fca3	8	5	3.67543	epidermis	on	1
31881	(393, 452, 75)	393	452	75	(393, 453, 71)	393	453	71			5.972	5.342	0.636	259	10	fca3	8	6	4.04794	epidermis	on	1
87276	(391, 511, 74)	391	511	74	(392, 519, 68)	392	519	68			7.032	5.27	0.697	117	10	fca3	8	7	4.81895	epidermis	on	1
99733	(387, 628, 66)	387	628	66	(392, 624, 66)	392	624	66			6.07	5.028	0.899	107	10	fca3	8	8	1.72395	epidermis	on	1
113532	(384, 740, 67)	384	740	67	(389, 745, 66)	389	745	66			6.844	5.061	0.995	2018	10	fca3	8	9	1.81739	epidermis	on	1
163747	(370, 881, 63)	370	881	63	(377, 890, 62)	377	890	62			6.324	4.936	0.937	44	10	fca3	8	10	1.8132	epidermis	on	1
47012	(357, 1008, 55)	357	1008	55	(366, 992, 55)	366	992	55			4.961	4.923	0.49	130	10	fca3	8	11	5.20149			1
19713	(340, 328, 77)	340	328	77	(336, 331, 70)	336	331	70			3.838	5.09	0.305	356	10	fca3	9	0	7.49361			1
20267	(343, 364, 77)	343	364	77	(343, 362, 73)	343	362	73			4.408	5.171	0.41	357	10	fca3	9	1	5.58022			1
20401	(342, 397, 77)	342	397	77	(345, 400, 75)	345	400	75			3.66	5.143	0.249	398	10	fca3	9	2	9.5558			1
19749	(340, 437, 77)	340	437	77	(340, 437, 74)	340	437	74			4.006	4.962	0.342	342	10	fca3	9	3	6.75145			1
30387	(350, 476, 77)	350	476	77	(348, 479, 72)	348	479	72			4.582	4.984	0.493	160	10	fca3	9	4	4.31012			1
31355	(347, 521, 77)	347	521	77	(348, 520, 72)	348	520	72			4.606	4.905	0.528	165	10	fca3	9	5	3.81848			1
50002	(352, 553, 75)	352	553	75	(348, 560, 70)	348	560	70			4.881	4.884	0.678	88	10	fca3	9	6	2.31512	cortex	off	1
53224	(356, 597, 77)	356	597	77	(346, 603, 70)	346	603	70			4.827	4.818	0.534	93	10	fca3	9	7	4.22133			1
63879	(345, 661, 73)	345	661	73	(345, 652, 70)	345	652	70			4.729	4.845	0.797	67	10	fca3	9	8	1.0885	cortex	off	1
69827	(354, 701, 74)	354	701	74	(342, 702, 69)	342	702	69			5.221	4.828	0.74	64	10	fca3	9	9	2.22741	cortex	on	1
148676	(344, 779, 71)	344	779	71	(339, 780, 68)	339	780	68			6.203	4.79	0.913	21	10	fca3	9	10	2.00409	cortex	on	1
200536	(342, 890, 70)	342	890	70	(329, 890, 67)	329	890	67			5.742	4.638	0.927	18	10	fca3	9	11	1.55617	cortex	on	1
140036	(301, 998, 66)	301	998	66	(321, 982, 65)	321	982	65			4.513	4.553	0.905	22	10	fca3	9	12	0.43374	cortex	off	1
5873	(240, 368, 77)	240	368	77	(239, 370, 75)	239	370	75			2.079		0.063	677	10	fca3	10	0	33			1
4776	(242, 386, 77)	242	386	77	(236, 387, 76)	236	387	76			1.508	4.829	0.037	564	10	fca3	10	1	35.9278			1
25142	(240, 422, 77)	240	422	77	(237, 430, 73)	237	430	73			4.309	5.279	0.315	229	10	fca3	10	2	8.40037			1
23186	(232, 472, 77)	232	472	77	(235, 474, 74)	235	474	74			4.752	5.137	0.319	216	10	fca3	10	3	9.75955			1
34550	(232, 514, 77)	232	514	77	(234, 516, 73)	234	516	73			4.888	4.951	0.476	144	10	fca3	10	4	5.31791			1
44006	(229, 562, 77)	229	562	77	(234, 559, 71)	234	559	71			5.252	4.981	0.536	109	10	fca3	10	5	4.81751			1
68613	(228, 615, 77)	228	615	77	(228, 606, 70)	228	606	70			5.323	4.866	0.537	52	10	fca3	10	6	5.04648			1
67935	(220, 653, 75)	220	653	75	(229, 658, 69)	229	658	69			6.696	5.003	0.679	51	10	fca3	10	7	4.85856	cortex	on	1
75155	(214, 710, 70)	214	710	70	(225, 707, 69)	225	707	69			6.412	4.84	0.949	47	10	fca3	10	8	1.91659	cortex	on	1
73361	(223, 746, 76)	223	746	76	(219, 754, 68)	219	754	68			5.472	4.805	0.604	53	10	fca3	10	9	4.2546	cortex	on	1
179742	(205, 829, 65)	205	829	65	(214, 835, 66)	214	835	66			6.031	4.655	0.924	31	10	fca3	10	10	1.87206	cortex	on	1
276505	(202, 945, 71)	202	945	71	(200, 948, 64)	200	948	64			4.897	4.539	0.894	16	10	fca3	10	11	0.938629	cortex	off	1
4535	(286, 147, 77)	286	147	77	(291, 146, 75)	291	146	75			1.447	4.625	0.042	935	10	fca3	11	0	29.8274			1
9961	(275, 163, 77)	275	163	77	(273, 165, 75)	273	165	75			2.525	5.069	0.129	625	10	fca3	11	1	14.5046			1
7282	(281, 179, 77)	281	179	77	(281, 181, 74)	281	181	74			2.477	5.246	0.147	423	10	fca3	11	2	11.6043			1
6778	(279, 193, 77)	279	193	77	(280, 196, 75)	280	196	75			1.895	5.295	0.106	559	10	fca3	11	3	12.5824			1
10951	(285, 208, 77)	285	208	77	(284, 209, 73)	284	209	73			3.107	5.28	0.275	383	10	fca3	11	4	6.01818			1
20729	(283, 232, 77)	283	232	77	(284, 233, 74)	284	233	74			4.122	5.258	0.274	242	10	fca3	11	5	9.7858			1
20087	(283, 261, 77)	283	261	77	(286, 262, 74)	286	262	74			4.026	5.152	0.299	250	10	fca3	11	6	8.31288			1
23646	(282, 293, 77)	282	293	77	(286, 294, 72)	286	294	72			4.66	5.513	0.42	315	10	fca3	11	7	5.58224			1
31463	(287, 322, 77)	287	322	77	(286, 321, 71)	286	321	71			5.976	5.415	0.525	218	10	fca3	11	8	5.96786			1
25536	(295, 347, 77)	295	347	77	(290, 349, 70)	290	349	70			4.384	5.15	0.463	192	10	fca3	11	9	4.31868			1
24461	(287, 371, 77)	287	371	77	(288, 372, 71)	288	372	71			4.694	5.181	0.468	206	10	fca3	11	10	4.84891			1
59090	(289, 404, 75)	289	404	75	(289, 408, 71)	289	408	71			6.159	5.126	0.673	83	10	fca3	11	11	4.02556	cortex	on	1
80137	(293, 461, 70)	293	461	70	(288, 461, 69)	288	461	69			6.055	5.052	0.944	45	10	fca3	11	12	1.36219	cortex	on	1
101148	(287, 518, 70)	287	518	70	(289, 518, 68)	289	518	68			5.989	5.002	0.953	27	10	fca3	11	13	1.28237	cortex	on	1
98799	(285, 580, 65)	285	580	65	(287, 578, 66)	287	578	66			5.331	4.933	0.997	29	10	fca3	11	14	0.414041	cortex	might be on	1
112556	(289, 630, 73)	289	630	73	(285, 636, 65)	285	636	65			5.184	4.952	0.765	35	10	fca3	11	15	1.82447	cortex	off	1
107375	(281, 694, 58)	281	694	58	(281, 696, 62)	281	696	62			5.437	4.879	0.995	33	10	fca3	11	16	0.585322	cortex	off	1
125158	(281, 770, 61)	281	770	61	(278, 755, 62)	278	755	62			5.956	4.822	0.981	2031	10	fca3	11	17	1.24936	cortex	on	1
159813	(274, 837, 65)	274	837	65	(272, 840, 60)	272	840	60			6.258	4.787	0.981	2029	10	fca3	11	18	1.5922	cortex	on	1
136625	(250, 924, 58)	250	924	58	(261, 932, 53)	261	932	53			4.788	4.685	0.952	25	10	fca3	11	19	0.344412	cortex	off	1
57614	(255, 1008, 50)	255	1008	50	(248, 996, 50)	248	996	50			4.536	4.636	0.517	128	10	fca3	11	20	4.13769			1
18622	(206, 86, 67)	206	86	67	(189, 97, 60)	189	97	60			3.596	5.249	0.65	313	12	fca3	1	0	0.283308		off	1
18292	(192, 125, 67)	192	125	67	(175, 137, 59)	175	137	59			3.255	5.213	0.592	395	12	fca3	1	1	0.285311		off	1
20526	(184, 162, 66)	184	162	66	(165, 176, 59)	165	176	59			3.3	5.185	0.603	360	12	fca3	1	2	0.287637		off	1
58538	(152, 243, 62)	152	243	62	(141, 242, 57)	141	242	57			4.261	5.274	0.731	112	12	fca3	1	3	0.555001		might be on	1
39670	(140, 299, 64)	140	299	64	(124, 318, 58)	124	318	58			3.825	5.166	0.691	197	12	fca3	1	4	0.369456		off	1
37150	(112, 393, 59)	112	393	59	(105, 395, 56)	105	395	56			4.449	5.236	0.776	132	12	fca3	1	5	0.497247		might be on	1
94423	(100, 489, 63)	100	489	63	(89, 503, 59)	89	503	59			4.624	5.114	0.859	68	12	fca3	1	6	0.269003		off	1
94935	(82, 640, 65)	82	640	65	(75, 665, 62)	75	665	62			4.394	4.973	0.861	29	12	fca3	1	7	0.130368		off	1
95220	(67, 876, 68)	67	876	68	(67, 833, 65)	67	833	65			4.598	4.832	0.825	83	12	fca3	1	8	0.741333		off	1
58455	(68, 1001, 72)	68	1001	72	(67, 969, 67)	67	969	67			4.445	4.74	0.5	124	12	fca3	1	9	4.15			1
21041	(154, 266, 44)	154	266	44	(152, 263, 44)	152	263	44			3.249	5.284	0.585	269	12	fca3	2	0	0.269846		off	1
24819	(157, 292, 49)	157	292	49	(149, 295, 47)	149	295	47			3.333	5.346	0.643	136	12	fca3	2	1	-0.162485		off	1
38549	(153, 331, 51)	153	331	51	(143, 332, 48)	143	332	48			4.417	5.413	0.797	237	12	fca3	2	2	0.129033		off	1
37948	(126, 386, 44)	126	386	44	(130, 381, 46)	130	381	46			4.395	5.303	0.813	108	12	fca3	2	3	0.102904		off	1
38827	(125, 427, 47)	125	427	47	(121, 430, 45)	121	430	45			4.685	5.428	0.855	99	12	fca3	2	4	0.0515322		off	1
44265	(126, 470, 51)	126	470	51	(120, 471, 49)	120	471	49			4.641	5.304	0.84	244	12	fca3	2	5	0.221		off	1
43553	(111, 529, 46)	111	529	46	(114, 522, 49)	114	522	49			5.047	5.387	0.86	163	12	fca3	2	6	0.481605		off	1
66674	(114, 572, 53)	114	572	53	(110, 569, 52)	110	569	52			5.04	5.176	0.945	70	12	fca3	2	7	0.157333		off	1
122501	(117, 635, 58)	117	635	58	(106, 658, 54)	106	658	54			5.125	5.268	0.901	81	12	fca3	2	8	0.420124		off	1
82541	(110, 737, 61)	110	737	61	(102, 757, 56)	102	757	56			5.063	5.074	0.964	98	12	fca3	2	9	0.178075		off	1
103283	(108, 828, 61)	108	828	61	(101, 845, 59)	101	845	59			4.939	4.952	0.889	79	12	fca3	2	10	0.603681			1
113543	(93, 958, 55)	93	958	55	(101, 952, 60)	101	952	60			5.131	4.904	0.94	39	12	fca3	2	11	0.554511		might be on	1
6006	(230, 20, 39)	230	20	39	(227, 20, 38)	227	20	38			2.144	5.274	0.426	362	12	fca3	3	0	-0.241136			1
8695	(224, 52, 38)	224	52	38	(221, 52, 37)	221	52	37			2.496	5.219	0.487	266	12	fca3	3	1	-0.0937433			1
9081	(214, 85, 37)	214	85	37	(215, 83, 37)	215	83	37			2.385	5.234	0.46	238	12	fca3	3	2	-0.0492174			1
11773	(209, 112, 39)	209	112	39	(203, 118, 36)	203	118	36			2.974	5.351	0.557	298	12	fca3	3	3	-0.0116822			1
13642	(200, 154, 37)	200	154	37	(194, 158, 35)	194	158	35			3.063	5.3	0.576	186	12	fca3	3	4	0.0177083			1
36342	(176, 219, 32)	176	219	32	(180, 212, 33)	180	212	33			3.783	5.287	0.714	135	12	fca3	3	5	0.0113193			1
48752	(160, 296, 31)	160	296	31	(159, 289, 31)	159	289	31			4.253	5.408	0.769	140	12	fca3	3	6	0.122559			1
[truncated: 2,379 more rows]
